# Supplementary material for: Palladium-catalyzed carbonylation of benzylic ammonium salts to amides and esters via C–N bond activation
Source: Royal Society of Chemistry journal article supplement (doi:10.1039/c8ob00488a), 2018-01-01

## **Palladium-Catalyzed Carbonylation of Benzylic Ammonium Salts via C-N Bond Activation under atmosphere pressure**

Weijie Yu<sup>a</sup>, Shuwu Yang<sup>a</sup>, Fei Xiong<sup>a</sup>, Tianxiang Fan<sup>a</sup>, Yan Feng<sup>a</sup>, Yuanyuan Huang<sup>a</sup>, Junkai  
Fu<sup>\*,b</sup>, Tao Wang<sup>\*,a</sup>

<sup>a</sup>National Research Center for Carbohydrate Synthesis and Key Laboratory of Chemical Biology, Jiangxi Normal University, Nanchang 330022, Jiangxi, P. R. China. E-mail: wangtao@jxnu.edu.cn

<sup>b</sup>Jilin Province Key Laboratory of Organic Functional Molecular Design & Synthesis, Department of Chemistry, Northeast Normal University, Changchun 130024, China

### **Supporting Information**

|                                                                                                 |            |
|-------------------------------------------------------------------------------------------------|------------|
| <b>Part 1. General informations.....</b>                                                        | <b>S1</b>  |
| <b>Part 2. Optimization details.....</b>                                                        | <b>S2</b>  |
| <b>Part 3. Synthesis of Benzylic Ammonium Salts.....</b>                                        | <b>S6</b>  |
| <b>Part 4. Scale-up experiment.....</b>                                                         | <b>S11</b> |
| <b>Part 5. Characterization of carbonylation products of amines.....</b>                        | <b>S13</b> |
| <b>Part 6. Characterization of carbonylation products of esters(reaction with alcohols)....</b> | <b>S26</b> |
| <b>Part 7. Characterization of carbonylation products of esters(reaction with phenols)....</b>  | <b>S33</b> |
| <b>Part 8. References.....</b>                                                                  | <b>S40</b> |
| <b>Part 9. <sup>1</sup>H NMR and <sup>13</sup>C NMR Spectra.....</b>                            | <b>S41</b> |

## Part 1. General informations

**1. Analytical methods.** All the reactions were monitored by thin-layer chromatography (TLC) or LC-MS (EI); products purification was done using silica gel column chromatography.  $^1\text{H}/^{13}\text{C}$  NMR spectra were recorded on Bruker avance 400 MHz and Bruker AMX 400 MHz spectrometer at 400/100 MHz, respectively, in  $\text{CDCl}_3$  unless otherwise stated, using either TMS or the undeuterated solvent residual signal as the reference. Chemical shifts are given in ppm and are measured relative to  $\text{CDCl}_3$  or  $\text{DMSO-d}_6$  as an internal standard. Mass spectra were obtained by the electrospray ionization time-of-flight (ESI-TOF) mass spectrometry. GC yields were obtained using biphenyl as an internal standard. Flash column chromatography purification of compounds was carried out by gradient elution using ethyl acetate (EA) in light petroleum ether (PE). Melting points were determined on an X-4 digital display microscope apparatus.

## Part 2. Optimization details

### General Procedure A: Carbonylation of **1a** and **2a** with CO (Table 1)

Ammonium salts **1a** (119.6 mg, 0.40 mmol), PdCl<sub>2</sub>(dppf) (4.4 mg, 0.006 mmol), PPh<sub>3</sub> (15.7 mg, 0.06 mmol) and Na<sub>2</sub>CO<sub>3</sub> (42.4 mg, 0.40 mmol) were added into a 25 mL Schlenk tube equipped with a magnetic stirred bar. The reaction mixture was degassed 3 times by CO and stirred under CO balloon. Toluene (1.0 mL), amine **2a** (18.6 mg, 0.20 mmol) and DMSO (0.2 mL) were then added into the tube by syringe. The reaction mixture was heated to 100 °C and monitored by TLC. Upon completion, the reaction was diluted by AcOEt (5 mL), The reaction was extracted with EA (20 mL x 3). The combined organic layers were washed with brine (20 mL) and dried over Na<sub>2</sub>SO<sub>4</sub>, filtered, and concentrated in vacuo. Purification by flash column chromatography (PE/EA = 4:1) afford the amide **3aa**. Alternatively, 1,1'-biphenyl (30.8 mg, 0.2 mmol) was added into the residue as internal standard (*k* = 1.235), and the yield of the product **3aa** was determined by GC analysis.

**Table 1.** Optimization for the reaction of *N,N,N*-trimethyl-1-phenylmethan-aminium trifluoromethanesulfonate (**1a**) and aniline (**2a**)<sup>a</sup>

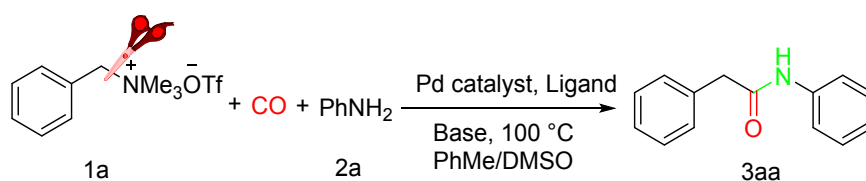

| Entry | Cat. (X mol%)                                          | Ligand (Y mol%)       | Solvent   | Base             | Yield <sup>b</sup> (%) |
|-------|--------------------------------------------------------|-----------------------|-----------|------------------|------------------------|
| 1     | PdCl <sub>2</sub> (5)                                  | PPh <sub>3</sub> (10) | PhMe/DMSO | EtN <sub>3</sub> | 22                     |
| 2     | Pd(PPh <sub>3</sub> ) <sub>4</sub> (5)                 | PPh <sub>3</sub> (10) | PhMe/DMSO | EtN <sub>3</sub> | 34                     |
| 3     | PdCl <sub>2</sub> (PPh <sub>3</sub> ) <sub>2</sub> (5) | PPh <sub>3</sub> (10) | PhMe/DMSO | EtN <sub>3</sub> | 48                     |
| 4     | PdCl <sub>2</sub> (dppf) (5)                           | PPh <sub>3</sub> (10) | PhMe/DMSO | EtN <sub>3</sub> | 66(65) <sup>c</sup>    |
| 5     | Pd(OAc) <sub>2</sub> (5)                               | PPh <sub>3</sub> (10) | PhMe/DMSO | EtN <sub>3</sub> | trace                  |
| 6     | Pd(TFA) <sub>2</sub> (5)                               | PPh <sub>3</sub> (10) | PhMe/DMSO | EtN <sub>3</sub> | trace                  |
| 7     | Pd(acac) <sub>2</sub> (5)                              | PPh <sub>3</sub> (10) | PhMe/DMSO | EtN <sub>3</sub> | trace                  |
| 8     | PdCl <sub>2</sub> (dppf) (5)                           | BINAP (10)            | PhMe/DMSO | EtN <sub>3</sub> | 60                     |
| 9     | PdCl <sub>2</sub> (dppf) (5)                           | dppf (10)             | PhMe/DMSO | EtN <sub>3</sub> | 62                     |
| 10    | PdCl <sub>2</sub> (dppf) (5)                           | Xantphos (10)         | PhMe/DMSO | EtN <sub>3</sub> | 55                     |
| 11    | PdCl <sub>2</sub> (dppf) (5)                           | 1,10-Phen (10)        | PhMe/DMSO | EtN <sub>3</sub> | 31                     |
| 12    | PdCl <sub>2</sub> (dppf) (5)                           | --                    | PhMe/DMSO | EtN <sub>3</sub> | 30                     |
| 13    | PdCl <sub>2</sub> (dppf) (5)                           | PPh <sub>3</sub> (10) | PhMe/DMSO | Pyridine         | 0                      |
| 14    | PdCl <sub>2</sub> (dppf) (5)                           | PPh <sub>3</sub> (10) | PhMe/DMSO | DBU              | trace                  |

|                 |                                   |                             |                                |                                              |                           |
|-----------------|-----------------------------------|-----------------------------|--------------------------------|----------------------------------------------|---------------------------|
| 15              | PdCl <sub>2</sub> (dppf) (5)      | PPh <sub>3</sub> (10)       | PhMe/DMSO                      | KO <sup>t</sup> Bu                           | trace                     |
| 16              | PdCl <sub>2</sub> (dppf) (5)      | PPh <sub>3</sub> (10)       | PhMe/DMSO                      | K <sub>2</sub> CO <sub>3</sub>               | 71                        |
| 17              | PdCl <sub>2</sub> (dppf) (5)      | PPh <sub>3</sub> (10)       | PhMe/DMSO                      | Na <sub>2</sub> CO <sub>3</sub>              | 80                        |
| 18              | PdCl <sub>2</sub> (dppf) (5)      | PPh <sub>3</sub> (10)       | PhMe                           | Na <sub>2</sub> CO <sub>3</sub>              | 58                        |
| 19              | PdCl <sub>2</sub> (dppf) (5)      | PPh <sub>3</sub> (10)       | DMF                            | Na <sub>2</sub> CO <sub>3</sub>              | trace                     |
| 20              | PdCl <sub>2</sub> (dppf) (5)      | PPh <sub>3</sub> (10)       | 1,4-dioxane                    | Na <sub>2</sub> CO <sub>3</sub>              | 0                         |
| 21              | PdCl <sub>2</sub> (dppf) (5)      | PPh <sub>3</sub> (10)       | (PhMe/DMSO) <sup>d</sup>       | Na <sub>2</sub> CO <sub>3</sub>              | 75                        |
| 22              | PdCl <sub>2</sub> (dppf) (5)      | PPh <sub>3</sub> (10)       | (PhMe/DMSO) <sup>e</sup>       | Na <sub>2</sub> CO <sub>3</sub>              | 82                        |
| 23              | PdCl <sub>2</sub> (dppf) (5)      | PPh <sub>3</sub> (10)       | (PhMe/DMSO) <sup>e</sup>       | Na <sub>2</sub> CO <sub>3</sub>              | 70                        |
| 24              | PdCl <sub>2</sub> (dppf) (5)      | PPh <sub>3</sub> (5)        | (PhMe/DMSO) <sup>e</sup>       | Na <sub>2</sub> CO <sub>3</sub>              | 58                        |
| 25              | PdCl <sub>2</sub> (dppf) (5)      | PPh <sub>3</sub> (20)       | (PhMe/DMSO) <sup>e</sup>       | Na <sub>2</sub> CO <sub>3</sub>              | 88                        |
| 26              | PdCl <sub>2</sub> (dppf) (5)      | PPh <sub>3</sub> (30)       | (PhMe/DMSO) <sup>e</sup>       | Na <sub>2</sub> CO <sub>3</sub>              | 91(90) <sup>c</sup>       |
| <b>27</b>       | <b>PdCl<sub>2</sub>(dppf) (3)</b> | <b>PPh<sub>3</sub> (30)</b> | <b>(PhMe/DMSO)<sup>e</sup></b> | <b>Na<sub>2</sub>CO<sub>3</sub></b>          | <b>97(97)<sup>c</sup></b> |
| 28              | PdCl <sub>2</sub> (dppf) (3)      | PPh <sub>3</sub> (30)       | (PhMe/DMSO) <sup>e</sup>       | Na <sub>2</sub> CO <sub>3</sub> <sup>f</sup> | 87                        |
| 29 <sup>g</sup> | PdCl <sub>2</sub> (dppf) (3)      | PPh <sub>3</sub> (30)       | (PhMe/DMSO) <sup>e</sup>       | Na <sub>2</sub> CO <sub>3</sub>              | trace                     |
| 30 <sup>h</sup> | PdCl <sub>2</sub> (dppf) (3)      | PPh <sub>3</sub> (30)       | (PhMe/DMSO) <sup>e</sup>       | Na <sub>2</sub> CO <sub>3</sub>              | 0                         |

<sup>a</sup> General reaction condition: **1a** (0.40 mmol), **2a** (0.20 mmol), catalyst (X mol %), ligand (Y mol %), base (0.40 mmol) in PhMe/DMSO (1.0 mL/0.1 mL) under 1 atm CO at 100 °C for 12 h. <sup>b</sup> Yield were determined by GC analysis. <sup>c</sup> Isolated yield. <sup>d</sup> PhMe/DMSO (0.75 mL/0.25 mL). <sup>e</sup> PhMe/DMSO (1.0 mL/0.2 mL). <sup>f</sup> Na<sub>2</sub>CO<sub>3</sub> (0.20 mmol). <sup>g</sup> 80 °C instead of 100 °C. <sup>h</sup> 60 °C instead of 100 °C.

### General Procedure B: Carbonylation of **1a** and **4a** with CO (Table 2)

Ammonium salts **1a** (59.8 mg, 0.2 mmol), PdCl<sub>2</sub>(dppf) (14.6 mg, 0.02 mmol), and Na<sub>2</sub>CO<sub>3</sub> (21.2 mg, 0.2 mmol) was added to a 25 mL schlenk tube equipped with a magnetic stirred bar, and a balloon filled with CO was connected to the Schlenk tube through the side arm after exhaust the air,. benzyl alcohol **2a** (108 mg, 1.0 mmol) and toluene (2.0 mL) were then injected into the tube by syringe. The reaction was then heated to 100 °C and stirred corresponding time. Upon completion, the reaction was quenched by AcOEt (5 mL). The reaction was extracted with EA (20 mL x 3). The combined organic layers were washed with brine (20 mL) and dried over Na<sub>2</sub>SO<sub>4</sub>, filtered, and concentrated in vacuo. Purification by flash column chromatography (PE/EA = 50:1) afford the amide **3aa**. Alternatively, 1,1'-biphenyl (30.8 mg, 0.2 mmol) was added into the residue as internal standard (k=1.108). The yield of the product **5aa** was determined by GC analysis.

**Table 2. Optimization for the reaction of N,N,N-trimethyl-1-phenylmethan -aminium trifluoromethanesulfonate (**1a**) and benzyl alcohol (**4a**)<sup>a</sup>**



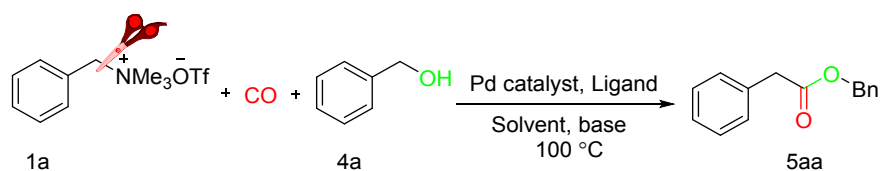

| Entry           | Cat. (X mol%)                                          | Ligand (Y mol%)       | Solvent              | Base                            | Yield <sup>b</sup> (%) |
|-----------------|--------------------------------------------------------|-----------------------|----------------------|---------------------------------|------------------------|
| 1               | PdCl <sub>2</sub> (dppf) (5)                           | PPh <sub>3</sub> (10) | PhMe                 | Na <sub>2</sub> CO <sub>3</sub> | 25                     |
| 2               | Pd(PPh <sub>3</sub> ) <sub>4</sub> (5)                 | PPh <sub>3</sub> (10) | PhMe                 | Na <sub>2</sub> CO <sub>3</sub> | 17                     |
| 3               | PdCl <sub>2</sub> (PPh <sub>3</sub> ) <sub>2</sub> (5) | PPh <sub>3</sub> (10) | PhMe                 | Na <sub>2</sub> CO <sub>3</sub> | trace                  |
| 4               | Pd(acac) <sub>2</sub> (5)                              | PPh <sub>3</sub> (10) | PhMe                 | Na <sub>2</sub> CO <sub>3</sub> | trace                  |
| 5               | Pd(OAc) <sub>2</sub> (5)                               | PPh <sub>3</sub> (10) | PhMe                 | Na <sub>2</sub> CO <sub>3</sub> | ND                     |
| 6               | PdCl <sub>2</sub> (5)                                  | PPh <sub>3</sub> (10) | PhMe                 | Na <sub>2</sub> CO <sub>3</sub> | ND                     |
| 7               | Pd <sub>2</sub> (dba) <sub>3</sub> (5)                 | PPh <sub>3</sub> (10) | PhMe                 | Na <sub>2</sub> CO <sub>3</sub> | ND                     |
| 8               | PdCl <sub>2</sub> (dppf) (5)                           | BINAP (10)            | PhMe                 | Na <sub>2</sub> CO <sub>3</sub> | trace                  |
| 9               | PdCl <sub>2</sub> (dppf) (5)                           | dppe (10)             | PhMe                 | Na <sub>2</sub> CO <sub>3</sub> | 19                     |
| 10              | PdCl <sub>2</sub> (dppf) (5)                           | dppf (10)             | PhMe                 | Na <sub>2</sub> CO <sub>3</sub> | 20                     |
| 11              | PdCl <sub>2</sub> (dppf) (5)                           | Xantphos (10)         | PhMe                 | Na <sub>2</sub> CO <sub>3</sub> | ND                     |
| 12              | PdCl <sub>2</sub> (dppf) (5)                           | --                    | PhMe                 | Na <sub>2</sub> CO <sub>3</sub> | 24                     |
| 13              | PdCl <sub>2</sub> (dppf) (5)                           | --                    | 1,4-dioxane          | Na <sub>2</sub> CO <sub>3</sub> | trace                  |
| 14              | PdCl <sub>2</sub> (dppf) (5)                           | --                    | DMF                  | Na <sub>2</sub> CO <sub>3</sub> | ND                     |
| 15              | PdCl <sub>2</sub> (dppf) (5)                           | --                    | PhCH <sub>2</sub> OH | Na <sub>2</sub> CO <sub>3</sub> | 72(70) <sup>c</sup>    |
| 16              | PdCl <sub>2</sub> (dppf) (5)                           | --                    | PhMe/DMSO (1:1)      | Na <sub>2</sub> CO <sub>3</sub> | 17                     |
| 17              | PdCl <sub>2</sub> (dppf) (5)                           | --                    | PhMe/DMF (1:1)       | Na <sub>2</sub> CO <sub>3</sub> | 16                     |
| 18 <sup>d</sup> | PdCl <sub>2</sub> (dppf) (5)                           | --                    | PhMe                 | Na <sub>2</sub> CO <sub>3</sub> | 34                     |
| 19 <sup>e</sup> | PdCl <sub>2</sub> (dppf) (5)                           | --                    | PhMe                 | Na <sub>2</sub> CO <sub>3</sub> | 66                     |
| 20 <sup>f</sup> | PdCl <sub>2</sub> (dppf) (5)                           | --                    | PhMe                 | Na <sub>2</sub> CO <sub>3</sub> | 79                     |
| 21 <sup>g</sup> | PdCl <sub>2</sub> (dppf) (5)                           | --                    | PhMe                 | Na <sub>2</sub> CO <sub>3</sub> | 77                     |
| 22 <sup>h</sup> | PdCl <sub>2</sub> (dppf) (5)                           | --                    | PhMe                 | Na <sub>2</sub> CO <sub>3</sub> | 47                     |
| 23 <sup>i</sup> | PdCl <sub>2</sub> (dppf) (5)                           | --                    | PhMe                 | Na <sub>2</sub> CO <sub>3</sub> | 69                     |
| 24              | PdCl <sub>2</sub> (dppf) (5)                           | --                    | PhMe                 | K <sub>2</sub> CO <sub>3</sub>  | 76                     |
| 25              | PdCl <sub>2</sub> (dppf) (5)                           | --                    | PhMe                 | Cs <sub>2</sub> CO <sub>3</sub> | 10                     |
| 26              | PdCl <sub>2</sub> (dppf) (5)                           | --                    | PhMe                 | NaHCO <sub>3</sub>              | 29                     |
| 27              | PdCl <sub>2</sub> (dppf) (5)                           | --                    | PhMe                 | DBU                             | trace                  |
| 28              | PdCl <sub>2</sub> (dppf) (3)                           | --                    | PhMe                 | Na <sub>2</sub> CO <sub>3</sub> | 10                     |
| 29              | PdCl <sub>2</sub> (dppf) (10)                          | --                    | PhMe                 | Na <sub>2</sub> CO <sub>3</sub> | 84(82)                 |

|                 |                                    |           |             |                                                 |               |
|-----------------|------------------------------------|-----------|-------------|-------------------------------------------------|---------------|
| 30              | PdCl <sub>2</sub> (dppf) (15)      | --        | PhMe        | Na <sub>2</sub> CO <sub>3</sub>                 | 81            |
| <b>31</b>       | <b>PdCl<sub>2</sub>(dppf) (10)</b> | <b>--</b> | <b>PhMe</b> | <b>Na<sub>2</sub>CO<sub>3</sub><sup>j</sup></b> | <b>84(82)</b> |
| 32              | PdCl <sub>2</sub> (dppf) (10)      | --        | PhMe        | Na <sub>2</sub> CO <sub>3</sub> <sup>k</sup>    | 75            |
| 33 <sup>l</sup> | PdCl <sub>2</sub> (dppf) (10)      | --        | PhMe        | Na <sub>2</sub> CO <sub>3</sub>                 | 37            |
| 34 <sup>m</sup> | PdCl <sub>2</sub> (dppf) (10)      | --        | PhMe        | Na <sub>2</sub> CO <sub>3</sub>                 | 50            |

<sup>a</sup>Reaction condition: 1a (0.2 mmol), 2a (0.2 mmol), catalyst (X mol%), ligand (Y mol%), base (0.4 mmol) in PhMe (2.0 mL) under 1 atm CO at 100 °C for 12 h. <sup>b</sup>Yield were determined by GC analysis. <sup>c</sup>Isolated yield; <sup>d</sup>1a: 4a=1:3; <sup>e</sup>1a: 4a=1:4; <sup>f</sup>1a: 4a=1:5; <sup>g</sup>1a: 4a=1:7; <sup>h</sup>1a: 4a=3:1; <sup>i</sup>1a: 4a=3:1; <sup>j</sup>Na<sub>2</sub>CO<sub>3</sub> (0.2 mmol, 1 equiv); <sup>k</sup>Na<sub>2</sub>CO<sub>3</sub> (0.1 mmol, 0.5 equiv); <sup>l</sup>90 °C instead of 100°C; <sup>m</sup>110 °C instead of 100°C.

### General Procedure C: Carbonylation of 1a and 6a with CO (Table 3)

Ammonium salts **1a** (59.8 mg, 0.2 mmol), PdCl<sub>2</sub>(dppf) (14.6 mg, 0.02 mmol), dppp (16.5 mg, 0.04 mmol), and Na<sub>2</sub>CO<sub>3</sub> (21.2 mg, 0.2 mmol) was added to a 25 mL schlenk tube equipped with a magnetic stirred bar, and a balloon filled with CO was connected to the Schlenk tube through the side arm after exhaust the air, phenol **6a** (56.4 mg, 0.6 mmol) and toluene (2.0 mL) were then injected into the tube by syringe. The reaction was then heated to 100 °C and stirred corresponding time. Upon completion, the reaction was quenched by AcOEt (5 mL). The reaction was extracted with EA (20 mL x 3). The combined organic layers were washed with brine (20 mL) and dried over Na<sub>2</sub>SO<sub>4</sub>, filtered, and concentrated in vacuo. Purification by flash column chromatography (PE/EA = 50:1) afford the amide **3aa**. Alternatively, 1,1'-biphenyl (30.8 mg, 0.2 mmol) was added into the residue as internal standard (k=1.026). The yield of the product **7aa** was determined by GC analysis.

**Table 3. Optimization for the reaction of N,N,N-trimethyl-1-phenylmethan -aminium trifluoromethanesulfonate (1a) and phenol (4a)<sup>a</sup>**

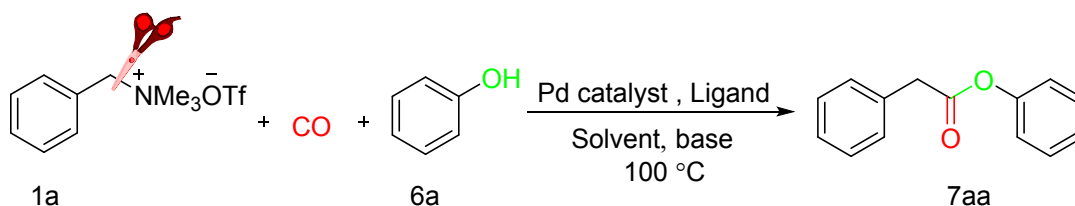

| Entry           | Cat. (X mol%)                           | Ligand (Y mol%)       | Solvent     | Base                                | Yield <sup>b</sup> (%)    |
|-----------------|-----------------------------------------|-----------------------|-------------|-------------------------------------|---------------------------|
| 1               | PdCl <sub>2</sub> (dppf) (10)           | --                    | PhMe        | Na <sub>2</sub> CO <sub>3</sub>     | 13                        |
| 2               | PdCl <sub>2</sub> (dppf) (10)           | TFP (20)              | PhMe        | Na <sub>2</sub> CO <sub>3</sub>     | 17                        |
| 3               | PdCl <sub>2</sub> (dppf) (10)           | BINAP (20)            | PhMe        | Na <sub>2</sub> CO <sub>3</sub>     | 69                        |
| 4               | PdCl <sub>2</sub> (dppf) (10)           | dppe (20)             | PhMe        | Na <sub>2</sub> CO <sub>3</sub>     | 19                        |
| <b>5</b>        | <b>PdCl<sub>2</sub>(dppf) (10)</b>      | <b>dppp (20)</b>      | <b>PhMe</b> | <b>Na<sub>2</sub>CO<sub>3</sub></b> | <b>82(81)<sup>c</sup></b> |
| 6               | PdCl <sub>2</sub> (dppf) (10)           | dppf (20)             | PhMe        | Na <sub>2</sub> CO <sub>3</sub>     | 70                        |
| 7               | PdCl <sub>2</sub> (dppf) (10)           | PPh <sub>3</sub> (20) | PhMe        | Na <sub>2</sub> CO <sub>3</sub>     | 28                        |
| 8               | Pd(PPh <sub>3</sub> ) <sub>4</sub> (10) | PPh <sub>3</sub> (20) | PhMe        | Na <sub>2</sub> CO <sub>3</sub>     | 19                        |
| 9               | PdCl <sub>2</sub> (10)                  | PPh <sub>3</sub> (20) | PhMe        | Na <sub>2</sub> CO <sub>3</sub>     | 14                        |
| 10              | Pd(acac) <sub>2</sub> (10)              | PPh <sub>3</sub> (20) | PhMe        | Na <sub>2</sub> CO <sub>3</sub>     | trace                     |
| 11              | Pd(OAc) <sub>2</sub> (10)               | PPh <sub>3</sub> (20) | PhMe        | Na <sub>2</sub> CO <sub>3</sub>     | trace                     |
| 12              | PdCl <sub>2</sub> (dppf) (10)           | dppp (20)             | DMF         | Na <sub>2</sub> CO <sub>3</sub>     | trace                     |
| 13              | PdCl <sub>2</sub> (dppf) (10)           | dppp (20)             | DMSO        | Na <sub>2</sub> CO <sub>3</sub>     | trace                     |
| 14              | PdCl <sub>2</sub> (dppf) (10)           | dppp (20)             | 1,4-dioxane | Na <sub>2</sub> CO <sub>3</sub>     | 31                        |
| 15              | PdCl <sub>2</sub> (dppf) (10)           | dppp (20)             | PhMe        | NaHCO <sub>3</sub>                  | 62                        |
| 16              | PdCl <sub>2</sub> (dppf) (10)           | dppp (20)             | PhMe        | K <sub>2</sub> CO <sub>3</sub>      | 48                        |
| 17              | PdCl <sub>2</sub> (dppf) (10)           | dppp (20)             | PhMe        | <sup>t</sup> BuONa                  | trace                     |
| 18              | PdCl <sub>2</sub> (dppf) (10)           | dppp (20)             | PhMe        | DBU                                 | trace                     |
| 19              | PdCl <sub>2</sub> (dppf) (5)            | dppp (20)             | PhMe        | Na <sub>2</sub> CO <sub>3</sub>     | 59                        |
| 20              | PdCl <sub>2</sub> (dppf) (5)            | dppp (10)             | PhMe        | Na <sub>2</sub> CO <sub>3</sub>     | 33                        |
| 21              | PdCl <sub>2</sub> (dppf) (3)            | dppp (10)             | PhMe        | Na <sub>2</sub> CO <sub>3</sub>     | 25                        |
| 22              | PdCl <sub>2</sub> (dppf) (3)            | dppp (30)             | PhMe        | Na <sub>2</sub> CO <sub>3</sub>     | 70                        |
| 23              | PdCl <sub>2</sub> (dppf) (5)            | dppp (20)             | PhMe        | Na <sub>2</sub> CO <sub>3</sub>     | 77                        |
| 24 <sup>d</sup> | PdCl <sub>2</sub> (dppf) (10)           | dppp (20)             | PhMe        | Na <sub>2</sub> CO <sub>3</sub>     | 79(77) <sup>c</sup>       |
| 25 <sup>e</sup> | PdCl <sub>2</sub> (dppf) (10)           | dppp (20)             | PhMe        | Na <sub>2</sub> CO <sub>3</sub>     | 68                        |
| 26 <sup>f</sup> | PdCl <sub>2</sub> (dppf) (10)           | dppp (20)             | PhMe        | Na <sub>2</sub> CO <sub>3</sub>     | trace                     |
| 27 <sup>g</sup> | PdCl <sub>2</sub> (dppf) (10)           | dppp (20)             | PhMe        | Na <sub>2</sub> CO <sub>3</sub>     | 45                        |

<sup>a</sup>Reaction condition: 1a (0.2 mmol), 6a (0.6 mmol), catalyst (X mol%), ligand (Y mol%), base (0.2 mmol) in PhMe (2.0 mL) under 1 atm CO at 100 °C for 12 h. <sup>b</sup>Yield were determined by GC analysis. <sup>c</sup>Isolated yield; <sup>d</sup>Na<sub>2</sub>CO<sub>3</sub> (0.4 mmol 2.0 equiv); <sup>e</sup>Na<sub>2</sub>CO<sub>3</sub> (0.1 mmol 0.5 equiv); <sup>f</sup>90 °C instead of 100°C; <sup>g</sup>110 °C instead of 100°C

### Part 3: Synthesis of Benzylic Ammonium Salts

#### General Procedure D (Preparation of Benzyl Ammonium Triflates): Preparation of N,N,N-Trimethyl-1-phenylmethanaminium trifluoromethanesulfonate

Dimethylbenzylamine (2.5 g, 18.5 mmol, 1.0 equiv) was dissolved in Et<sub>2</sub>O (15 mL, 4.0 M). MeOTf (2.7 mL, 23.9 mmol, 1.3 equiv) was added dropwise at 0 °C. White precipitate formed immediately. After complete addition the reaction mixture was stirred for an additional 30 minutes at 0 °C. The precipitate was isolated by filtration and washed with Et<sub>2</sub>O (2 x 20 mL). The resulting solid was dried under vacuum to give salt 1a (5.17 g, 94%) as a white solid (mp 97–99 °C)

Substituted dimethyl benzyl amines were prepared either from the benzyl amines using Eschweiler–Clarke conditions<sup>1</sup> or via reductive amination of the benzaldehyde or acetophenone derivative<sup>2</sup>.

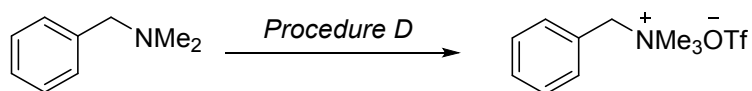

**N,N,N-trimethyl-1-phenylmethanaminium trifluoromethanesulfonate**, was synthesized following the procedure D from dimethyl benzyl amine, white solid, 95%, Mp: 97-99° C, Analytical data were in agreement with previous reports.<sup>3</sup>

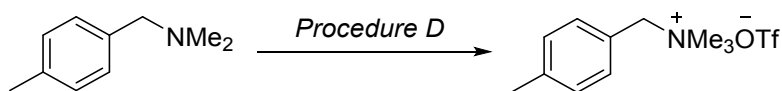

**N,N,N-trimethyl-1-(p-tolyl)methanaminium trifluoromethanesulfonate**, was synthesized following the procedure D from corresponding dimethyl benzyl amine, white solid, 95%, Mp: 110-113° C, <sup>1</sup>H NMR (400 MHz, DMSO-d<sub>6</sub>) δ 7.41 (d, *J* = 7.8 Hz, 2H), 7.33 (d, *J* = 7.5 Hz, 2H), 4.46 (s, 2H), 3.00 (s, 9H), 2.36 (s, 3H). <sup>13</sup>C NMR (101 MHz, DMSO-d<sub>6</sub>) δ 140.5, 133.1, 123.0, 125.8, 121.1(d, *J*<sub>C-F</sub> = 320.5 Hz), 68.2, 52.1, 21.3. FTIR(KBr): 3037, 1488, 1483, 1263, 1230, 1152, 1035. HRMS(ESI) calcd for C<sub>11</sub>H<sub>18</sub>N<sup>+</sup>[M-OTf]<sup>+</sup> 164.1434, found 164.1442.

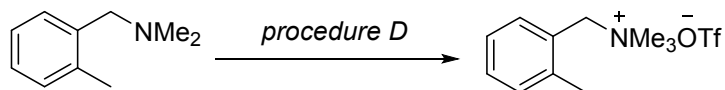

**N,N,N-trimethyl-1-(o-tolyl)methanaminium trifluoromethanesulfonate**, was synthesized following the procedure D from corresponding dimethyl benzyl amine, white solid, 90%, Mp: 116-118° C. <sup>1</sup>H NMR (400 MHz, DMSO-d<sub>6</sub>) δ 7.49 - 7.30 (m, 4H), 4.55 (d, *J* = 3.0 Hz, 2H), 3.05 (d, *J* = 2.9 Hz, 9H), 2.44 (s, 3H). <sup>13</sup>C NMR (101 MHz, DMSO-d<sub>6</sub>) δ 140.3, 134.7, 132.0, 130., 127.2, 126.6, 121.2(d, *J*<sub>C-F</sub> = 320.4 Hz), 65.6, 52.4, 20.1. FTIR(KBr): 3039, 1496, 1279, 1278, 1258, 1228, 1161, 1146, 1034. HRMS(ESI) calcd for C<sub>12</sub>H<sub>18</sub>N<sup>+</sup>[M-OTf]<sup>+</sup> 164.1434, found 164.1438.

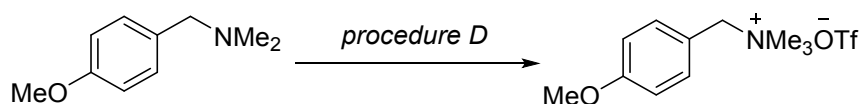

**1-(4-methoxyphenyl)-N,N,N-trimethylmethanaminium trifluoromethanesulfonate**, was synthesized following the procedure D from corresponding dimethyl benzyl amine, white soild, 95%, Mp: 94-95° C, Analytical data were in agreement with previous reports.<sup>3</sup>

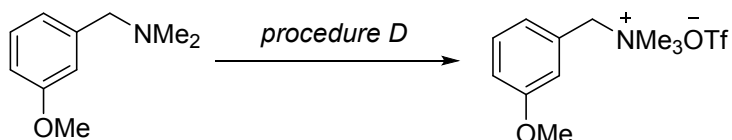

**1-(3-methoxyphenyl)-N,N,N-trimethylmethanaminium, trifluoromethanesulfonate**, was synthesized following the procedure D from corresponding dimethyl benzyl amine, light brown soild, 89%, Mp: 59-62° C, Analytical data were in agreement with previous reports.<sup>3</sup>

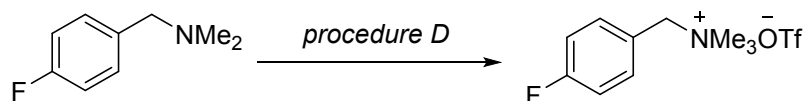

**1-(4-fluorophenyl)-N,N,N-trimethylmethanaminium trifluoromethanesulfonate**, was synthesized following the procedure D from corresponding dimethyl benzyl amine, white soild, 89%, Mp: 130-132° C. <sup>1</sup>H NMR (400 MHz, DMSO-*d*<sub>6</sub>) δ 7.66 – 7.55 (m, 2H), 7.41 – 7.31 (m, 2H), 4.51 (d, *J* = 3.2 Hz, 2H), 3.01 (d, *J* = 2.7 Hz, 9H). <sup>13</sup>C NMR (101 MHz, DMSO-*d*<sub>6</sub>) δ 163.7 (d, *J*<sub>C-F</sub> = 247.6 Hz), 135.6 (d, *J*<sub>C-F</sub> = 8.8 Hz), 125.2, 121.2 (d, *J*<sub>C-F</sub> = 322.9 Hz), 116.4 (d, *J*<sub>C-F</sub> = 22.2 Hz), 67.5, 52.2. FTIR(KBr): 3036, 1512, 1488, 1263, 1228, 1261, 1156, 1035 HRMS(ESI) calcd for C<sub>10</sub>H<sub>15</sub>FN<sup>+</sup>[M-OTf]<sup>+</sup> 168.1183, found 168.1189.

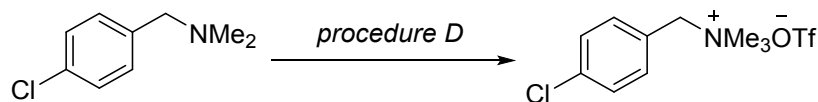

**1-(4-chlorophenyl)-N,N,N-trimethylmethanaminium trifluoromethanesulfonate**, was synthesized following the procedure D from corresponding dimethyl benzyl amine, white soild, 90%, Mp: 120-122° C. <sup>1</sup>H NMR (400 MHz, DMSO) δ 7.62 – 7.54(m,4H), 4.54 (dd, *J* = 19.5, 2.9 Hz, 2H), 3.02 (d, *J* = 2.3 Hz, 9H). <sup>13</sup>C NMR (101 MHz, DMSO) δ 135.8, 135.1, 129.5, 127.8, 121.2 (d, *J* = 320.3 Hz), 67.4, 52.3. FTIR(KBr): 3038, 1488, 1261, 1156, 1035. HRMS(ESI) calcd for C<sub>10</sub>H<sub>15</sub>ClN<sup>+</sup>[M-OTf]<sup>+</sup> 184.0888, found 184.0892

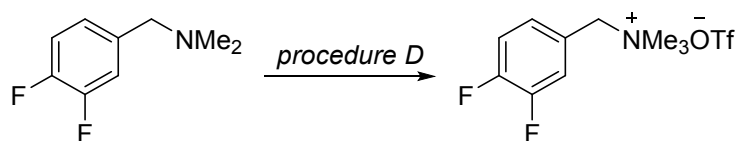

**1-(3,4-difluorophenyl)-N,N,N-trimethylmethanaminium trifluoromethanesulfonate**, was synthesized following the procedure D from corresponding dimethyl benzyl amine, white soild, 88%, Mp: 117-119° C, Analytical data were in agreement with previous reports.<sup>3</sup>

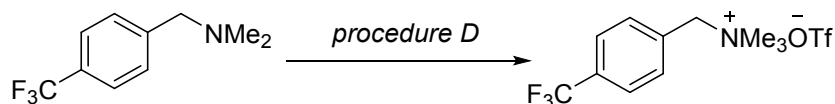

**N,N,N-trimethyl-1-(4-(trifluoromethyl)phenyl)methanaminium trifluoromethanesulfonate**, was synthesized following the procedure D from corresponding dimethyl benzyl amine, white soild, 90%, Mp: 117-119° C, Analytical data were in agreement with previous reports.

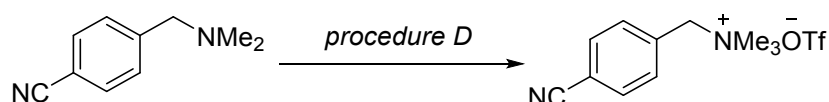

**1-(4-cyanophenyl)-N,N,N-trimethylmethanaminium trifluoromethanesulfonate**, was synthesized following the procedure D from corresponding dimethyl benzyl amine, white soild, 90%, Mp: 133-135° C. <sup>1</sup>H NMR (400 MHz, DMSO-d<sub>6</sub>) δ 8.02 (d, *J* = 8.2 Hz, 2H), 7.74 (d, *J* = 8.2 Hz, 2H), 4.61 (s, 2H), 3.05 (s, 9H). <sup>13</sup>C NMR (101 MHz, DMSO-d<sub>6</sub>) δ 134.2, 133.9, 133.2, 121.2 (d, *J*<sub>C-F</sub> = 320.6 Hz), 118.7, 113.6, 67.4, 52.6. FTIR(KBr): 3038, 2230, 1485, 1493, 1285, 1260, 1156, 1028. HRMS(ESI) calcd for C<sub>11</sub>H<sub>15</sub>N<sub>2</sub><sup>+</sup>[M-OTf]<sup>+</sup> 175.1230, found 175.1238

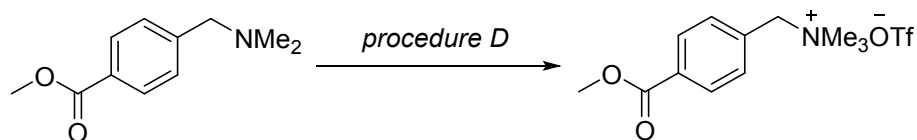

**1-(4-**

**(methoxycarbonyl)phenyl)-N,N,N-trimethylmethanaminium trifluoromethane sulfonate**, was synthesized following the procedure D from corresponding dimethyl benzyl amine, white soild, 92%, Mp: 168-171° C, <sup>1</sup>H NMR (400 MHz, DMSO-d<sub>6</sub>) δ 8.08 (d, *J* = 7.6 Hz, 2H), 7.69 (d, *J* = 8.1 Hz, 2H), 4.60 (d, *J* = 3.0 Hz, 2H), 3.89 (d, *J* = 1.5 Hz, 3H), 3.05 (d, *J* = 3.5 Hz, 9H). <sup>13</sup>C NMR (101 MHz, DMSO-d<sub>6</sub>) δ 166.2, 133.7, 131.7, 130.0, 121.2 (d, *J*<sub>C-F</sub> = 320.6 Hz), 67.6, 52.9, 52.5. FTIR(KBr): 3034, 1728, 1282, 1259, 1163, 1032, 1032. HRMS(ESI) calcd for C<sub>12</sub>H<sub>18</sub>NO<sub>2</sub><sup>+</sup>[M-OTf]<sup>+</sup> 208.1332, found 208.1340

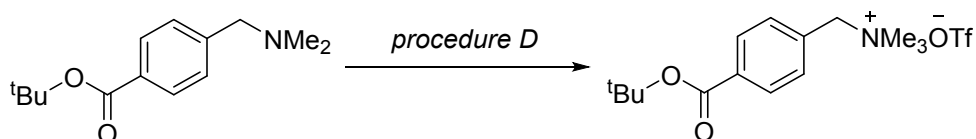

**1-(4-(tert-butoxycarbonyl)phenyl)-N,N,N-trimethylmethanaminium trifluoromethanesulfonate**, was synthesized following the procedure D from corresponding dimethyl benzyl amine, white soild, 92%, Mp: 114-116° C, <sup>1</sup>H NMR (400 MHz, DMSO-d<sub>6</sub>) δ 8.02 (d, *J* = 8.2 Hz, 2H), 7.66 (d, *J* = 9.5 Hz, 2H), 4.59 (d, *J* =

2.2 Hz, 2H), 3.04 (d,  $J = 2.4$  Hz, 9H), 1.56 (s, 9H).  $^{13}\text{C}$  NMR (101 MHz, DMSO- $d_6$ )  $\delta$  164.9, 133.6, 133.4, 133.2, 129.9, 121.2(d,  $J_{C-F} = 314.3$  Hz), 81.8, 67.7, 52.5, 28.2. FTIR(KBr): 3037, 2994, 1696, 1492, 1304, 1141, 1123, 1031. HRMS(ESI) calcd for  $\text{C}_{15}\text{H}_{24}\text{NO}_2^+[\text{M-OTf}]^+$  250.1802, found 250.1809

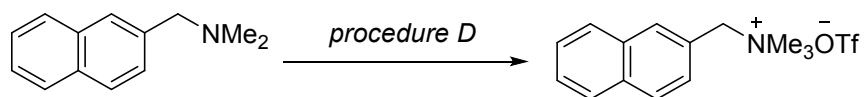

**N,N,N-trimethyl-1-(naphthalen-2-yl)methanaminium trifluoromethanesulfonate**, was synthesized following the procedure D from corresponding dimethyl benzyl amine, white solid, 90%, Mp: 108-110° C, Analytical data were in agreement with previous reports.<sup>3</sup>

#### Part 4: Scale-up experiment

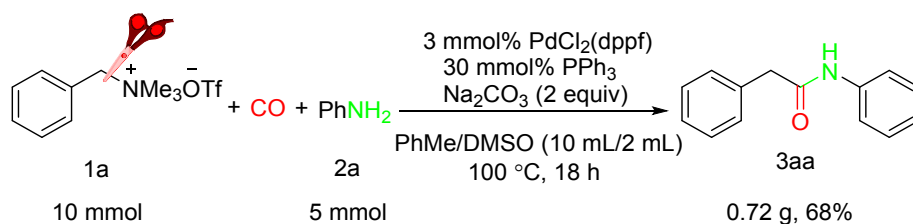

According to Procedure A, ammonium salts **1a** (2.99 g, 10 mmol), PdCl<sub>2</sub>(dppf) (109.8 mg, 0.15 mmol), PPh<sub>3</sub> (393 mg, 1.5 mmol), and Na<sub>2</sub>CO<sub>3</sub> (1.06 g, 10 mmol) was added to a 50 mL schlenk flask equipped with a magnetic stirred bar, a and a balloon filled with CO was connected to the Schlenk tube through the side arm after exhaust the air, DMSO (2 mL), amine **2a** (18.6 mg, 0.2 mmol) and toluene (10 mL) were then injected into the tube by syringe. The reaction was then heated to 100 °C and stirred 18 h (Fig 1). Upon completion, the reaction was quenched by AcOEt (5 mL). The reaction was extracted with EA (60 mL x 3). The combined organic layers were washed with brine (60 mL) and dried over Na<sub>2</sub>SO<sub>4</sub>, filtered, and concentrated in vacuo. Purification by flash column chromatography (silica gel, hexanes:EtOAc= 4:1), 0.72 g (68%) **3aa** was obtained as light yellow solid .

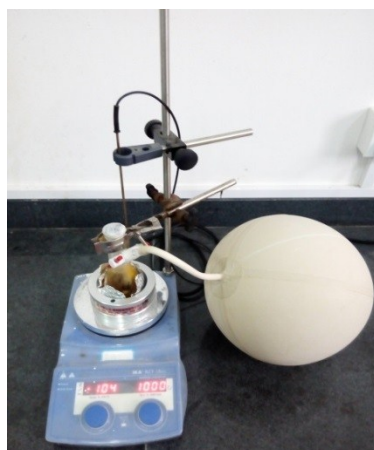

Fig 1

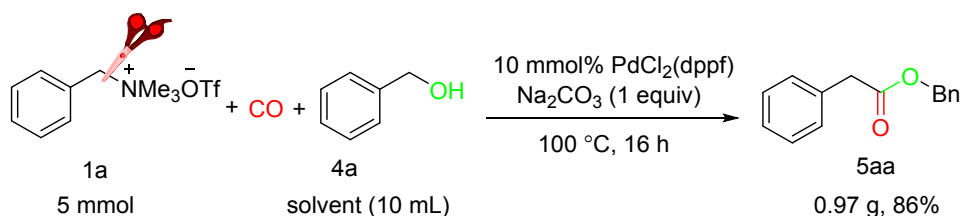

According to Procedure B, ammonium salts **1a** (1.50 g, 5 mmol), PdCl<sub>2</sub>(dppf) (366 mg, 0.5 mmol), and Na<sub>2</sub>CO<sub>3</sub> (530 mg, 5 mmol) was added to a 50 mL schlenk flask equipped with a magnetic stirred bar, and a balloon filled with CO was connected to the Schlenk tube through the side arm after exhaust the air,, benzyl alcohol **4a** (10 mL) were then injected into the tube by syringe. The reaction was then heated to 100 °C and stirred 16 h. Upon completion. The reaction was extracted with EA



(60 mL x 3). The combined organic layers were washed with brine (60 mL) and dried over Na<sub>2</sub>SO<sub>4</sub>, filtered, and concentrated in vacuo. Purification by flash column chromatography (silica gel, hexanes:EtOAc= 100:1), 0.97 g (86%) **5aa** was obtained as yellow liquid .

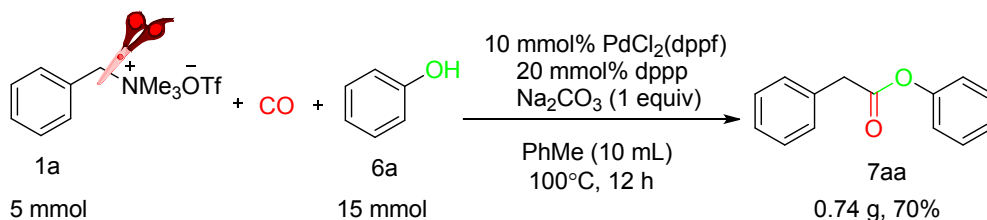

According to Procedure C, ammonium salts **1a** (1.50 g, 5 mmol), PdCl<sub>2</sub>(dppf) (370 mg, 0.5 mmol), dppp (415 mg, 1 mmol), Na<sub>2</sub>CO<sub>3</sub> (530 mg, 5 mmol), and phenol **6a** (1.4 g, 15 mmol) was added to a 50 mL schlenk flask equipped with a magnetic stirred bar, and a balloon filled with CO was connected to the Schlenk tube through the side arm after exhaust the air, toluene (10 mL) were then injected into the tube by syringe. The reaction was then heated to 100 °C and stirred 12 h (Fig 1). Upon completion, the reaction was quenched by AcOEt (5 mL). The reaction was extracted with EA (60 mL x 3). The combined organic layers were washed with brine (60 mL) and dried over Na<sub>2</sub>SO<sub>4</sub>, filtered, and concentrated in vacuo. Purification by flash column chromatography (silica gel, hexanes:EtOAc= 100:1), 0.74 g (70%) **3aa** was obtained as colorless liquid .

## Part 5. Characterization of carbonylation products of amines(3aa—3bj)

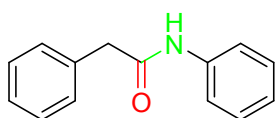

N,2-diphenylacetamide (3aa)<sup>4,5</sup>, this compound was prepared according to General Procedure A for 12 h, Yield: 97% (40.9 mg), light yellow solid, Mp: 118 – 120°C; <sup>1</sup>H NMR (400 MHz, CDCl<sub>3</sub>) δ 7.45 – 7.29 (d, 7H), 7.28 – 7.23 (m, 2H), 7.08 (t, *J*=7.4Hz, 1H), 3.70 (s, 2H); <sup>13</sup>C NMR (100 MHz, CDCl<sub>3</sub>) δ 169.2, 137.7, 134.6, 129.5, 129.2, 128.9, 127.6, 124.5, 120.0, 44.8. HRMS(ESI<sup>+</sup>) calculated for C<sub>14</sub>H<sub>13</sub>NO [M+H]<sup>+</sup>: 212.1075; found: 212.1077.

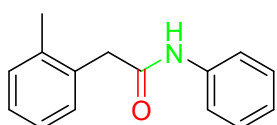

N-phenyl-2-(o-tolyl)acetamide (3ab)<sup>[40748-53-6]</sup>, this compound was prepared according to General Procedure A for 12 h, Yield: 95% (42.6 mg), light yellow solid, Mp: 133 - 135°C; <sup>1</sup>H NMR (400 MHz, CDCl<sub>3</sub>) δ 7.38 (d, *J* = 7.9 Hz, 2H), 7.28 – 7.21 (m, 7H), 7.06 (t, *J* = 7.2 Hz, 1H), 3.70 (s, 2H), 2.32 (s, 3H). <sup>13</sup>C NMR (100 MHz, CDCl<sub>3</sub>) δ 169.1, 137.6, 137.3, 133.0, 130.9, 130.5, 128.9, 128.1, 126.8, 124.4, 120.0, 42.8, 19.5. HRMS(ESI<sup>+</sup>) calculated for C<sub>15</sub>H<sub>15</sub>NO [M+H]<sup>+</sup>: 226.1232; found: 226.1237.

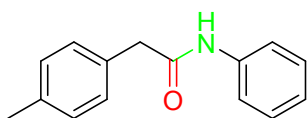

N-phenyl-2-(p-tolyl)acetamide (3ac)<sup>5</sup>, this compound was prepared according to General Procedure A for 12 h, Yield: 95% (42.7 mg), yellow solid, Mp: 156 - 158°C; <sup>1</sup>H NMR (400 MHz, CDCl<sub>3</sub>) δ 7.44 (d, *J* = 8.0 Hz, 2H), 7.29 (dd, *J* = 10.0, 5.4 Hz, 3H), 7.23 (s, 4H), 7.10 (t, *J* = 7.3 Hz, 1H), 3.71 (s, 2H), 2.39 (s, 3H). <sup>13</sup>C NMR (100 MHz, CDCl<sub>3</sub>) δ 169.5, 137.7, 137.4, 131.4, 130.0, 129.5, 128.9, 124.4, 119.9, 44.5, 21.1. HRMS(ESI<sup>+</sup>) calculated for C<sub>15</sub>H<sub>15</sub>NO [M+Na]<sup>+</sup>: 248.1051; found: 248.1055.

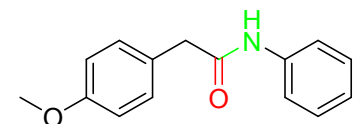

2-(4-methoxyphenyl)-N-phenylacetamide (3ad)<sup>5</sup>, this compound was prepared according to General Procedure A for 10 h, Yield: 96% (46.2 mg), yellow solid, Mp: 115 - 117°C; <sup>1</sup>H NMR (400 MHz, CDCl<sub>3</sub>) δ 7.44 (s, 1H), 7.34 (d, *J* = 7.9 Hz, 2H), 7.15 (dd, *J* = 18.4, 8.2 Hz, 4H), 6.98 (t, *J* = 7.3 Hz, 1H), 6.80 (d, *J* = 8.2 Hz, 2H), 3.71 (s, 3H), 3.54 (s, 2H). <sup>13</sup>C NMR (100 MHz, CDCl<sub>3</sub>) δ 169.8, 159.1, 137.8, 130.6, 128.9, 126.5, 124.4, 119.9, 114.5, 55.3, 43.8. HRMS(ESI<sup>+</sup>) calculated for C<sub>15</sub>H<sub>15</sub>NO<sub>2</sub> [M+Na]<sup>+</sup>: 264.1000; found: 264.1004.

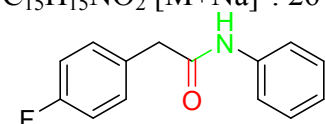

**2-(4-fluorophenyl)-N-phenylacetamide (3ae)**<sup>5</sup>, this compound was prepared according to General Procedure A for 16 h, Yield: 81% (37.2 mg), light yellow solid, Mp: 124 - 126°C; <sup>1</sup>H NMR (400 MHz, CDCl<sub>3</sub>) δ 7.43 (d, *J* = 8.0 Hz, 2H), 7.31 – 7.22 (m, 4H), 7.11 – 7.01 (m, 3H), 3.66 (s, 2H). <sup>13</sup>C NMR (101 MHz, CDCl<sub>3</sub>) δ 169.0, 162.24 (d, *J*<sub>C-F</sub> = 246.4 Hz), 137.6, 131.1 (d, *J*<sub>C-F</sub> = 8.0 Hz), 130.3 (d, *J*<sub>C-F</sub> = 3.4 Hz), 129.0, 124.6, 120.0, 116.0 (d, *J*<sub>C-F</sub> = 22.5 Hz), 43.8; HRMS(ESI<sup>+</sup>) calculated for C<sub>14</sub>H<sub>12</sub>FNO [M+H]<sup>+</sup>: 230.0981; found: 230.0978.

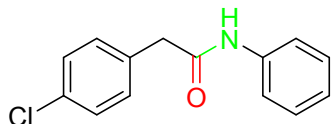

**2-(4-chlorophenyl)-N-phenylacetamide (3af)**<sup>7</sup>, this compound was prepared according to General Procedure A for 12 h, Yield: 89% (43.7 mg), light yellow solid, Mp: 170 - 172°C; <sup>1</sup>H NMR (400 MHz, DMSO-d<sub>6</sub>) δ 10.19 (s, 1H), 7.60 (d, *J* = 7.9 Hz, 2H), 7.37 (q, *J* = 8.6 Hz, 4H), 7.30 (t, *J* = 7.8 Hz, 2H), 7.04 (t, *J* = 7.3 Hz, 1H), 3.66 (s, 2H). <sup>13</sup>C NMR (100 MHz, DMSO-d<sub>6</sub>) δ 168.8, 139.2, 135.1, 131.4, 131.1, 128.8, 128.3, 123.4, 119.2, 42.5. HRMS(ESI<sup>+</sup>) calculated for C<sub>14</sub>H<sub>12</sub>ClNO [M+H]<sup>+</sup>: 246.0686; found: 246.0685

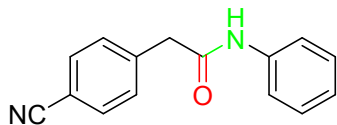

**2-(4-cyanophenyl)-N-phenylacetamide (3ag)**, this compound was prepared according to General Procedure A for 14 h, Yield: 85% (40.3 mg), yellow solid, Mp: 156 - 159°C; <sup>1</sup>H NMR (400 MHz, DMSO) δ 10.26 (s, 1H), 7.81 (d, *J* = 8.1 Hz, 2H), 7.61 (d, *J* = 8.0 Hz, 2H), 7.55 (d, *J* = 8.1 Hz, 2H), 7.31 (t, *J* = 7.8 Hz, 2H), 7.05 (t, *J* = 7.3 Hz, 1H), 3.79 (s, 2H). <sup>13</sup>C NMR (100 MHz, DMSO-d<sub>6</sub>) δ 168.2, 141.9, 139.1, 132.2, 130.4, 128.8, 123.5, 119.3, 119.0, 109.6, 43.2. FTIR(KBr): 1668 cm<sup>-1</sup> (CH<sub>2</sub>CONR<sub>1</sub>R<sub>2</sub>), HRMS(ESI<sup>+</sup>) calculated for C<sub>15</sub>H<sub>12</sub>N<sub>2</sub>O [M+H]<sup>+</sup>: 237.1028; found: 237.1032.

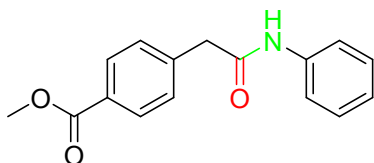

**methyl 4-(2-oxo-2-(phenylamino)ethyl)benzoate (3ah)**, this compound was prepared according to General Procedure A for 12 h, Yield: 94% (50.8 mg), white solid, Mp: 164 - 166°C; <sup>1</sup>H NMR (400 MHz, DMSO-d<sub>6</sub>) δ 10.25 (s, 1H), 7.95 (d, *J* = 8.0 Hz, 2H), 7.62 (d, *J* = 7.8 Hz, 2H), 7.50 (d, *J* = 7.9 Hz, 2H), 7.31 (t, *J* = 7.7 Hz, 2H), 7.05 (t, *J* = 7.3 Hz, 1H), 3.85 (s, 3H), 3.77 (s, 2H). <sup>13</sup>C NMR (100 MHz, DMSO-d<sub>6</sub>) δ 168.5, 166.2, 141.7, 139.2, 129.7, 129.3, 128.9, 128.1, 123.4, 119.2, 52.1, 43.3. FTIR(KBr): 1664 cm<sup>-1</sup> (CH<sub>2</sub>CONR<sub>1</sub>R<sub>2</sub>), HRMS(ESI<sup>+</sup>) calculated for C<sub>16</sub>H<sub>15</sub>NO<sub>3</sub> [M+Na]<sup>+</sup>: 292.0950; found: 292.0953.

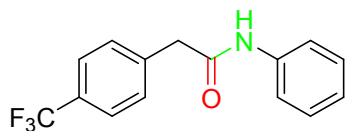

**N-phenyl-2-(4-(trifluoromethyl)phenyl)acetamide (3ai)**, this compound was prepared according to General Procedure A for 8 h, Yield: 98% (54.7 mg), light red solid, Mp: 135 - 138°C;  $^1\text{H}$  NMR (400 MHz, DMSO- $d_6$ )  $\delta$  10.25 (s, 1H), 7.70 (d,  $J$  = 8.0 Hz, 2H), 7.63 (d,  $J$  = 8.1 Hz, 2H), 7.58 (d,  $J$  = 8.0 Hz, 2H), 7.31 (t,  $J$  = 7.8 Hz, 2H), 7.06 (t,  $J$  = 7.3 Hz, 1H), 3.80 (s, 2H).  $^{13}\text{C}$  NMR (100 MHz, DMSO- $d_6$ )  $\delta$  168.8, 141.2 (d,  $J_{\text{C-F}}$  = 1.0 Hz), 139.5, 130.5, 129.2, 127.8 (d,  $J_{\text{C-F}}$  = 31.4 Hz), 125.5 (q,  $J_{\text{C-F}}$  = 7.1 Hz), 124.9 (d,  $J_{\text{C-F}}$  = 270.2 Hz), 123.8, 119.7, 43.4. FTIR(KBr): 1658  $\text{cm}^{-1}$  ( $\text{CH}_2\text{CONR}_1\text{R}_2$ ), HRMS(ESI $^+$ ) calculated for  $\text{C}_{15}\text{H}_{12}\text{F}_3\text{NO}[\text{M}+\text{H}]^+$ : 280.0949; found: 280.0947.

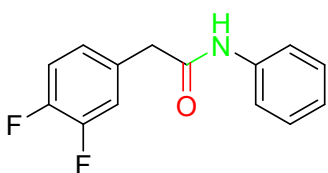

**2-(3,4-difluorophenyl)-N-phenylacetamide (3aj)**, this compound was prepared according to General Procedure A for 8 h, Yield: 95% (47.2 mg), light yellow solid, Mp: 108 - 110°C;  $^1\text{H}$  NMR (400 MHz, DMSO- $d_6$ )  $\delta$  10.19 (s, 1H), 7.62 (d,  $J$  = 7.9 Hz, 2H), 7.40 (dd,  $J$  = 16.2, 8.6 Hz, 2H), 7.31 (t,  $J$  = 7.7 Hz, 2H), 7.19 (s, 1H), 7.05 (t,  $J$  = 7.3 Hz, 1H), 3.69 (s, 2H).  $^{13}\text{C}$  NMR (100 MHz, DMSO- $d_6$ )  $\delta$  168.6, 150.1 (dd,  $J_{\text{C-F}}$  = 70.3, 12.4 Hz), 147.6 (dd,  $J_{\text{C-F}}$  = 69.3, 12.5 Hz), 139.2, 133.7 (dd,  $J_{\text{C-F}}$  = 6.3, 3.8 Hz), 128.9, 126.1 (dd,  $J_{\text{C-F}}$  = 6.3, 3.3 Hz), 123.4, 119.3, 118.3 (d,  $J_{\text{C-F}}$  = 17.1 Hz), 117.2 (d,  $J_{\text{C-F}}$  = 16.9 Hz), 42.2. FTIR(KBr): 1655  $\text{cm}^{-1}$  ( $\text{CH}_2\text{CONR}_1\text{R}_2$ ), HRMS(ESI $^+$ ) calculated for  $\text{C}_{14}\text{H}_{11}\text{F}_2\text{NO}[\text{M}+\text{H}]^+$ : 248.0887; found: 248.0884.

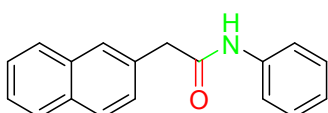

**N,2-diphenylacetamide (3ak)**, this compound was prepared according to General Procedure A For 14 h, Yield 63% (32.8 mg), white solid, Mp: 118 - 120°C;  $^1\text{H}$  NMR (400 MHz, DMSO- $d_6$ )  $\delta$  10.24 (s, 1H), 7.88 (d,  $J$  = 8.0 Hz, 3H), 7.85 (s, 1H), 7.63 (d,  $J$  = 7.8 Hz, 2H), 7.54 - 7.47 (m, 3H), 7.31 (t,  $J$  = 7.8 Hz, 2H), 7.05 (t,  $J$  = 7.4 Hz, 1H), 3.84 (s, 2H).  $^{13}\text{C}$  NMR (100 MHz, DMSO- $d_6$ )  $\delta$  169.5, 139.7, 134.2, 133.5, 132.3, 129.2, 128.2, 128.1, 126.6, 126.1, 123.72 (s), 119.7, 43.9. FTIR(KBr): 1658  $\text{cm}^{-1}$  ( $\text{CH}_2\text{CONR}_1\text{R}_2$ ); HRMS(ESI $^+$ ) calculated for  $\text{C}_{18}\text{H}_{15}\text{NO}[\text{M}+\text{H}]^+$ : 262.1232; found: 262.1238.

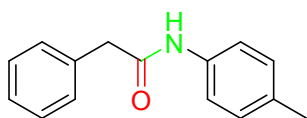

**2-phenyl-N-(p-tolyl)acetamide (3al)**<sup>5</sup>, this compound was prepared according to General Procedure A for 12 h, Yield: 87% (39.3 mg), white solid, Mp: 128 - 131°C;  $^1\text{H}$  NMR (400 MHz,  $\text{CDCl}_3$ )  $\delta$

7.38 (s, 1H), 7.31 – 7.24 (m, 2H), 7.21 (d,  $J = 7.3$  Hz, 5H), 6.97 (d,  $J = 8.0$  Hz, 2H), 3.56 (s, 2H), 2.19 (s, 3H).  $^{13}\text{C}$  NMR (100 MHz,  $\text{CDCl}_3$ )  $\delta$  169.3, 135.2, 134.7, 134.1, 129.5, 129.4, 129.1, 127.5, 120.1, 44.7, 20.9. HRMS(ESI<sup>+</sup>) calculated for  $\text{C}_{15}\text{H}_{15}\text{NO}$   $[\text{M}+\text{H}]^+$ : 248.1051; found: 248.1053.

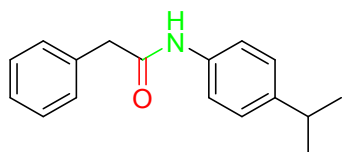

**N-(4-isopropylphenyl)-2-phenylacetamide (3am)**, this compound was prepared according to General Procedure A for 8 h, Yield: 96% (48.5 mg), white solid, Mp: 134 - 136°C;  $^1\text{H}$  NMR (400 MHz,  $\text{CDCl}_3$ )  $\delta$  7.40 (s, 1H), 7.34 (m, 2H), 7.31 (t,  $J = 5.4$  Hz, 5H), 7.11 (d,  $J = 8.4$  Hz, 2H), 3.68 (s, 2H), 2.88 – 2.78 (m, 1H), 1.20 (s, 2H), 1.19 (s, 3H).  $^{13}\text{C}$  NMR (100 MHz,  $\text{CDCl}_3$ )  $\delta$  169.2, 145.2, 135.4, 134.7, 129.5, 129.1, 127.5, 126.8, 120.2, 44.7, 33.6, 24.0. FTIR(KBr): 1658  $\text{cm}^{-1}$  ( $\text{CH}_2\text{CONR}_1\text{R}_2$ ), HRMS(ESI<sup>+</sup>) calculated for  $\text{C}_{17}\text{H}_{19}\text{NO}$   $[\text{M}+\text{H}]^+$ : 276.1364; found: 276.1366.

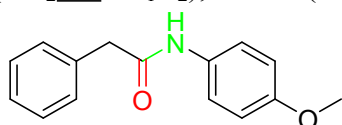

**N-(4-methoxyphenyl)-2-phenylacetamide (3an)**<sup>6</sup>, this compound was prepared according to General Procedure A for 12 h, Yield: 89% (42.7 mg), light yellow solid, Mp: 121 – 124°C;  $^1\text{H}$  NMR (400 MHz,  $\text{CDCl}_3$ )  $\delta$  7.38 – 7.25 (m, 8H), 6.77 (d,  $J = 8.6$  Hz, 2H), 3.73 (s, 3H), 3.63 (s, 2H).  $^{13}\text{C}$  NMR (100 MHz,  $\text{CDCl}_3$ )  $\delta$  169.3, 156.5, 134.8, 130.9, 129.4, 129.0, 127.4, 122.0, 114.0, 55.5, 44.4. HRMS(ESI<sup>+</sup>) calculated for  $\text{C}_{15}\text{H}_{15}\text{NO}_2$   $[\text{M}+\text{H}]^+$ : 264.1000; found: 264.1005.

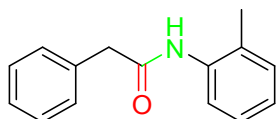

**2-phenyl-N-(o-tolyl)acetamide (3ao)**<sup>6</sup>, this compound was prepared according to General Procedure A for 8 h, Yield 99% (44.6 mg), white solid, Mp: 158 - 161°C;  $^1\text{H}$  NMR (400 MHz,  $\text{CDCl}_3$ )  $\delta$  7.77 (d,  $J = 8.0$  Hz, 1H), 7.35 – 7.29 (m, 2H), 7.26 (d,  $J = 7.3$  Hz, 3H), 7.08 (t,  $J = 7.5$  Hz, 1H), 6.99 (d,  $J = 7.2$  Hz, 1H), 6.91 (dd,  $J = 14.6, 7.1$  Hz, 2H), 3.67 (s, 2H), 1.80 (s, 3H).  $^{13}\text{C}$  NMR (100 MHz,  $\text{CDCl}_3$ )  $\delta$  169.1, 135.6, 134.7, 130.4, 129.7, 129.4, 128.3, 127.8, 126.8, 125.0, 122.3, 44.9, 17.1. HRMS(ESI<sup>+</sup>) calculated for  $\text{C}_{15}\text{H}_{15}\text{NO}$   $[\text{M}+\text{H}]^+$ : 248.1051; found: 248.1052.

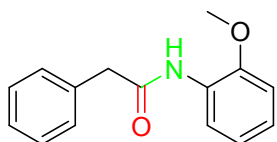

**N-(2-methoxyphenyl)-2-phenylacetamide (3ap)**<sup>8</sup>, this compound was prepared according to General Procedure A for 8 h, Yield 99% (47.7 mg), white solid, Mp: 158 - 161°C;  $^1\text{H}$  NMR (400 MHz,  $\text{CDCl}_3$ )  $\delta$  8.26 (d,  $J = 7.8$  Hz, 1H), 7.72 (s, 1H), 7.32 – 7.27 (m, 2H), 7.27 – 7.22 (m, 3H), 6.90

(t,  $J = 7.7$  Hz, 1H), 6.83 (t,  $J = 7.7$  Hz, 1H), 6.70 (d,  $J = 8.0$  Hz, 1H), 3.65 (s, 2H), 3.61 (s, 3H).  $^{13}\text{C}$  NMR (101 MHz,  $\text{CDCl}_3$ ) 168.9, 147.9, 134.6, 129.5, 129.0, 127.5, 127.5, 123.7, 121.0, 119.5, 110.0, 55.6, 45.1. HRMS(ESI<sup>+</sup>) calculated for  $\text{C}_{15}\text{H}_{15}\text{NO}_2$  [M+H]<sup>+</sup>: 264.1000; found: 264.1004.

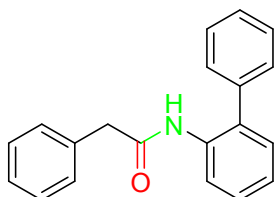

**N-([1,1'-biphenyl]-2-yl)-2-phenylacetamide (3aq)**, this compound was prepared according to General Procedure A for 12 h, Yield 90% (47.7 mg), white solid, Mp: 158 - 161°C;  $^1\text{H}$  NMR (400 MHz,  $\text{CDCl}_3$ )  $\delta$  8.35 (d,  $J = 8.2$  Hz, 1H), 7.35 – 7.29 (m, 2H), 7.29 – 7.23 (m, 3H), 7.19 (s, 2H), 7.11 (d,  $J = 6.5$  Hz, 2H), 7.03 (d,  $J = 6.5$  Hz, 5H), 3.58 (s, 2H).  $^{13}\text{C}$  NMR (101 MHz,  $\text{CDCl}_3$ )  $\delta$  168.9, 137.6, 134.7, 133.8, 132.1, 129.9, 129.3, 129.1, 128.9, 128.8, 128.3, 127.6, 127.4, 124.1, 120.9, 45.1. FTIR(KBr): 1655  $\text{cm}^{-1}$  ( $\text{CH}_2\text{CONR}_1\text{R}_2$ ); HRMS(ESI<sup>+</sup>) calculated for  $\text{C}_{20}\text{H}_{17}\text{NO}$ [M+H]<sup>+</sup>: 310.1208; found: 310.1208.

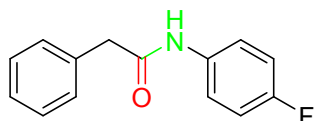

**N-(4-fluorophenyl)-2-phenylacetamide (3ar)**<sup>7</sup>, this compound was prepared according to General Procedure A for 10 h, Yield: 95% (43.7 mg), brown solid, Mp: 133 - 135°C;  $^1\text{H}$  NMR (400 MHz,  $\text{DMSO-d}_6$ )  $\delta$  10.22 (s, 1H), 7.63 (dd,  $J = 8.9, 5.0$  Hz, 2H), 7.35 – 7.30 (m, 4H), 7.27 – 7.23 (m, 1H), 7.13 (t,  $J = 8.8$  Hz, 2H), 3.64 (s, 2H).  $^{13}\text{C}$  NMR (100 MHz,  $\text{DMSO-d}_6$ )  $\delta$  169.5, 158.44 (d,  $J_{\text{C-F}} = 239.7$  Hz), 136.4, 136.1 (d,  $J_{\text{C-F}} = 2.6$  Hz), 129.6, 128.8, 127.0, 121.4 (d,  $J_{\text{C-F}} = 7.8$  Hz), 115.7 (d,  $J_{\text{C-F}} = 22.2$  Hz), 43.7. HRMS(ESI<sup>+</sup>) calculated for  $\text{C}_{14}\text{H}_{12}\text{FNO}$ [M+H]<sup>+</sup>: 230.0981; found: 230.0981.

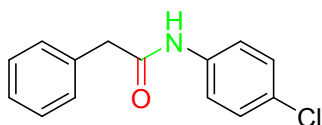

**N-(4-chlorophenyl)-2-phenylacetamide (3as)**<sup>5,7</sup>, this compound was prepared according to General Procedure A for 14 h, Yield: 87% (42.8 mg), light yellow solid, Mp: 170 - 172°C;  $^1\text{H}$  NMR (400 MHz,  $\text{CDCl}_3$ )  $\delta$  7.37 (dd,  $J = 7.7, 5.4$  Hz, 5H), 7.30 (d,  $J = 7.4$  Hz, 3H), 7.21 (d,  $J = 8.7$  Hz, 2H), 3.70 (s, 2H).  $^{13}\text{C}$  NMR (100 MHz,  $\text{CDCl}_3$ )  $\delta$  169.3, 136.2, 134.2, 129.5, 129.3, 128.9, 127.8, 126.4, 121.2, 44.7. HRMS(ESI<sup>+</sup>) calculated for  $\text{C}_{14}\text{H}_{12}\text{ClNO}$ [M+H]<sup>+</sup>: 246.0686; found: 246.0684.

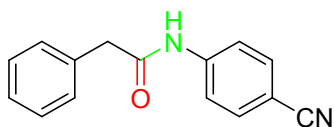

**N-(4-cyanophenyl)-2-phenylacetamide(3at)**<sup>6</sup>, this compound was prepared according to General Procedure A for 12 h, Yield: 95% (44.7 mg), yellow solid; <sup>1</sup>H NMR (400 MHz, DMSO-d<sub>6</sub>) δ 10.62 (s, 1H), 7.78 (q, *J* = 8.5 Hz, 4H), 7.34 (d, *J* = 3.8 Hz, 4H), 7.26 (d, *J* = 3.4 Hz, 1H), 3.71 (s, 2H). <sup>13</sup>C NMR (100 MHz, DMSO-d<sub>6</sub>) δ 170.1, 143.5, 135.5, 133.4, 129.3, 128.4, 126.8, 119.2, 119.1, 105.1, 43.4. HRMS(ESI<sup>+</sup>) calculated for C<sub>15</sub>H<sub>12</sub>N<sub>2</sub>O[M+H]<sup>+</sup>: 237.1028; found: 237.1030.

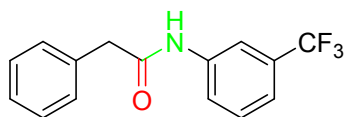

**2-phenyl-N-(3-(trifluoromethyl)phenyl)acetamide (3au)**<sup>5</sup>, this compound was prepared according to General Procedure A for 8 h, Yield: 98% (54.7 mg), light yellow solid, Mp: 84 - 86°C; <sup>1</sup>H NMR (400 MHz, CDCl<sub>3</sub>) δ 7.76 (s, 1H), 7.65 (s, 1H), 7.52 (d, *J* = 7.3 Hz, 1H), 7.27 – 7.17 (m, 7H), 3.60 (s, 2H). <sup>13</sup>C NMR (100 MHz, CDCl<sub>3</sub>) δ 169.6, 138.2, 134.1, 131.6 (q, *J* = 32.6 Hz), 129.4, 129.3, 127.8, 123.8 (q, *J*<sub>C-F</sub> = 270.7 Hz), 123.0, 121.0 (d, *J*<sub>C-F</sub> = 3.7 Hz), 119.7, 116.6 (d, *J*<sub>C-F</sub> = 3.6 Hz), 44.7. FTIR(KBr): 1639 cm<sup>-1</sup> (CH<sub>2</sub>CONR<sub>1</sub>R<sub>2</sub>), HRMS(ESI<sup>+</sup>) calculated for C<sub>15</sub>H<sub>12</sub>F<sub>3</sub>NO[M+H]<sup>+</sup>: 280.0949; found: 280.0948.

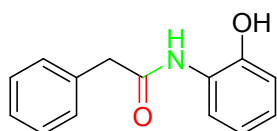

**N-(2-hydroxyphenyl)-2-phenylacetamide (3av)**, this compound was prepared according to General Procedure A for 12 h, Yield: 78% (35.3 mg), yellow solid, Mp: 61 - 64°C; <sup>1</sup>H NMR (400 MHz, DMSO-d<sub>6</sub>) δ 9.79 (s, 1H), 9.34 (s, 1H), 7.78 (d, *J* = 7.9 Hz, 1H), 7.38 – 7.30 (m, 4H), 7.27 – 7.22 (m, 1H), 6.93 (t, *J* = 7.6 Hz, 1H), 6.86 (d, *J* = 7.9 Hz, 1H), 6.75 (t, *J* = 7.6 Hz, 1H), 3.75 (s, 2H). <sup>13</sup>C NMR (100 MHz, DMSO-d<sub>6</sub>) δ 169.5, 147.6, 136.1, 129.2, 128.3, 126.5, 126.3, 124.5, 121.9, 118.9, 115.5, 42.9. FTIR(KBr): 1639 cm<sup>-1</sup> (CH<sub>2</sub>CONR<sub>1</sub>R<sub>2</sub>), HRMS(ESI<sup>+</sup>) calculated for C<sub>14</sub>H<sub>13</sub>NO<sub>2</sub>[M+H]<sup>+</sup>: 250.0844; found: 250.0846.

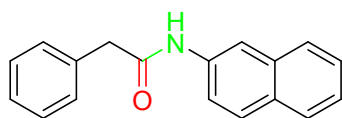

**N-(naphthalen-2-yl)-2-phenylacetamide (3aw)**<sup>5</sup>, this compound was prepared according to General Procedure A for 14 h, Yield: 76% (39.6 mg), brown solid, Mp: 157 - 160°C; <sup>1</sup>H NMR (400 MHz, DMSO-d<sub>6</sub>) δ 10.39 (s, 1H), 8.32 (s, 1H), 7.85 (d, *J* = 4.7 Hz, 1H), 7.82 (d, *J* = 3.0 Hz, 1H), 7.62 (dd, *J* = 8.8, 1.6 Hz, 1H), 7.45 (t, *J* = 7.2 Hz, 1H), 7.42 (d, *J* = 7.8 Hz, 3H), 7.37 (s, 1H), 7.33 (d, *J* = 7.6 Hz, 2H), 7.26 (d, *J* = 7.2 Hz, 1H), 3.72 (s, 2H). <sup>13</sup>C NMR (100 MHz, DMSO-d<sub>6</sub>) δ 169.5, 136.9, 136.1, 133.5, 129.8, 129.2, 128.4, 128.4, 127.5, 127.3, 126.6, 126.5, 124.6, 120.0, 115.3, 43.5. HRMS (ESI<sup>+</sup>) calculated for C<sub>18</sub>H<sub>15</sub>NO [M+H]<sup>+</sup>: 284.1051; found: 284.1050.

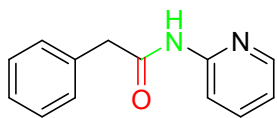

**2-phenyl-N-(pyridin-2-yl)acetamide (3ax)**, this compound was prepared according to General Procedure A for 12 h, Yield: 89% (37.6 mg), brown solid, Mp: 123 - 124°C;  $^1\text{H}$  NMR (400 MHz,  $\text{CDCl}_3$ )  $\delta$  8.47 (s, 1H), 8.18 – 8.06 (m, 2H), 7.59 (t,  $J = 7.8$  Hz, 1H), 7.29 – 7.23 (m, 2H), 7.21 (d,  $J = 7.0$  Hz, 3H), 6.95 – 6.87 (m, 1H), 3.65 (s, 2H).  $^{13}\text{C}$  NMR (100 MHz,  $\text{CDCl}_3$ )  $\delta$  169.7, 151.4, 147.6, 138.4, 134.1, 129.4, 129.1, 127.6, 119.9, 114.2, 44.8. FTIR(KBr): 1639  $\text{cm}^{-1}$  ( $\text{CH}_2\text{CONR}_1\text{R}_2$ ), 1640  $\text{cm}^{-1}$  ( $\text{CH}_2\text{CONR}_1\text{R}_2$ ), HRMS(ESI $^+$ ) calculated for  $\text{C}_{13}\text{H}_{12}\text{N}_2\text{O}$   $[\text{M}+\text{H}]^+$ : 213.1028; found: 213.1024.

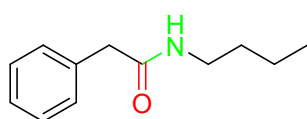

**N-butyl-2-phenylacetamide (3ay)**<sup>4</sup>, this compound was prepared according to General Procedure A for 12 h, Yield: 79% (30.1 mg), brown solid, Mp: 53 - 55°C;  $^1\text{H}$  NMR (400 MHz,  $\text{CDCl}_3$ )  $\delta$  7.35 (t,  $J = 7.2$  Hz, 2H), 7.30 (d,  $J = 7.1$  Hz, 1H), 7.26 (dd,  $J = 5.4, 4.4$  Hz, 2H), 5.45 (s, 1H), 3.56 (s, 2H), 3.20 (dd,  $J = 13.1, 6.9$  Hz, 2H), 1.40 (dt,  $J = 14.8, 7.2$  Hz, 2H), 1.25 (dd,  $J = 15.0, 7.4$  Hz, 2H), 0.87 (t,  $J = 7.3$  Hz, 3H).  $^{13}\text{C}$  NMR (100 MHz,  $\text{CDCl}_3$ )  $\delta$  170.9, 135.1, 129.5, 129.0, 127.3, 43.9, 39.4, 31.5, 20.0, 13.7. HRMS(ESI $^+$ ) calculated for  $\text{C}_{12}\text{H}_{17}\text{NO}$   $[\text{M}+\text{H}]^+$ : 192.1388; found: 192.1391.

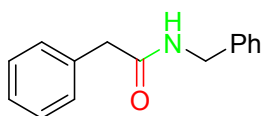

**N-benzyl-2-phenylacetamide (3az)**<sup>4</sup>, this compound was prepared according to General Procedure A for 12 h, Yield: 72% (32.4 mg), yellow solid, Mp: 123 - 125°C;  $^1\text{H}$  NMR (400 MHz,  $\text{CDCl}_3$ )  $\delta$  7.36 – 7.30 (m, 2H), 7.26 (t,  $J = 7.0$  Hz, 6H), 7.16 (d,  $J = 7.2$  Hz, 2H), 5.87 (s, 1H), 4.39 (d,  $J = 5.7$  Hz, 2H), 3.60 (s, 2H).  $^{13}\text{C}$  NMR (100 MHz,  $\text{CDCl}_3$ )  $\delta$  170.9, 138.2, 134.8, 129.4, 129.0, 128.6, 127.5, 127.4, 127.4, 43.8, 43.6. HRMS (ESI $^+$ ) calculated for  $\text{C}_{15}\text{H}_{15}\text{NO}$   $[\text{M}+\text{H}]^+$ : 226.1232; found: 226.1229.

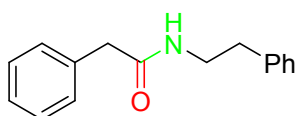

**N-phenethyl-2-phenylacetamide (3ba)**, this compound was prepared according to General Procedure A for 10 h, Yield: 81% (38.6 mg), yellow solid, Mp: 92 - 95°C;  $^1\text{H}$  NMR (400 MHz,  $\text{CDCl}_3$ )  $\delta$  7.32 (d,  $J = 7.3$  Hz, 2H), 7.26 (dd,  $J = 14.0, 6.8$  Hz, 3H), 7.16 (d,  $J = 6.9$  Hz, 3H), 7.02 (d,  $J = 7.0$  Hz, 2H), 5.43 (s, 1H), 3.52 (s, 2H), 3.45 (dd,  $J = 12.9, 6.5$  Hz, 2H), 2.71 (t,  $J = 6.8$  Hz, 2H).  $^{13}\text{C}$  NMR (100 MHz,  $\text{CDCl}_3$ )  $\delta$  170.9, 138.7, 134.8, 129.5, 129.0, 128.7, 128.6, 127.3, 126.4, 43.9,



40.7, 35.5. FTIR(KBr): 1639  $\text{cm}^{-1}$  ( $\text{CH}_2\text{CONR}_1\text{R}_2$ ), 1640  $\text{cm}^{-1}$  ( $\text{CH}_2\text{CONR}_1\text{R}_2$ ), HRMS (ESI<sup>+</sup>) calculated for  $\text{C}_{16}\text{H}_{17}\text{NO}$   $[\text{M}+\text{Na}]^+$ : 262.1208; found: 262.1210.

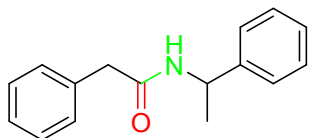

**2-phenyl-N-(1-phenylethyl)acetamide (3bb)**, this compound was prepared according to General Procedure A for 10 h, Yield: 91% (43.4 mg), white solid, Mp: 115 - 117°C; <sup>1</sup>H NMR (400 MHz,  $\text{CDCl}_3$ )  $\delta$  7.34 (t,  $J = 7.1$  Hz, 2H), 7.31 – 7.22 (m, 6H), 7.18 (d,  $J = 7.0$  Hz, 2H), 5.16 – 5.06 (m, 1H), 3.56 (s, 2H), 1.39 (d,  $J = 6.9$  Hz, 3H). <sup>13</sup>C NMR (100 MHz,  $\text{CDCl}_3$ )  $\delta$  170.0, 143.1, 135.0, 129.4, 129.0, 128.6, 127.3, 127.3, 126.0, 48.8, 43.9, 21.8. FTIR(KBr): 1641  $\text{cm}^{-1}$  ( $\text{CH}_2\text{CONR}_1\text{R}_2$ ), HRMS(ESI<sup>+</sup>) calculated for  $\text{C}_{16}\text{H}_{17}\text{NO}$   $[\text{M}+\text{Na}]^+$ : 262.1208; found: 262.1206.

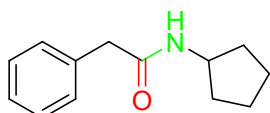

**N-cyclopentyl-2-phenylacetamide (3bc)**, this compound was prepared according to General Procedure A for 16 h, Yield: 63% (25.8 mg), yellow solid, Mp: 116 - 119°C; <sup>1</sup>H NMR (400 MHz,  $\text{CDCl}_3$ )  $\delta$  7.35 (t,  $J = 7.2$  Hz, 2H), 7.29 (d,  $J = 7.1$  Hz, 1H), 7.24 (d,  $J = 7.2$  Hz, 2H), 5.40 (s, 1H), 4.18 (dd,  $J = 13.9, 7.0$  Hz, 1H), 3.54 (s, 2H), 1.92 (dd,  $J = 12.1, 6.1$  Hz, 2H), 1.55 (s, 4H), 1.28 – 1.22 (m, 2H). <sup>13</sup>C NMR (100 MHz,  $\text{CDCl}_3$ )  $\delta$  170.5, 135.2, 129.4, 129.0, 127.2, 51.3, 43.9, 33.0, 23.6. FTIR(KBr): 1641  $\text{cm}^{-1}$  ( $\text{CH}_2\text{CONR}_1\text{R}_2$ ), HRMS(ESI<sup>+</sup>) calculated for  $\text{C}_{13}\text{H}_{17}\text{NO}$   $[\text{M}+\text{Na}]^+$ : 226.1208; found: 226.1207.

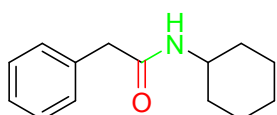

**N-cyclohexyl-2-phenylacetamide (3bd)**<sup>8</sup>, this compound was prepared according to General Procedure A for 12 h, Yield: 85% (36.9 mg), light yellow solid, Mp: 131 - 133°C; <sup>1</sup>H NMR (400 MHz,  $\text{CDCl}_3$ )  $\delta$  7.34 (t,  $J = 7.3$  Hz, 2H), 7.28 (d,  $J = 7.8$  Hz, 1H), 7.25 (d,  $J = 7.1$  Hz, 2H), 5.40 (s, 1H), 3.80 – 3.69 (m, 1H), 3.53 (s, 2H), 1.84 – 1.81 (m, 2H), 1.66 – 1.54 (m, 2H), 1.37 – 1.21 (m, 2H), 1.06 – 0.98 (m, 2H). <sup>13</sup>C NMR (100 MHz,  $\text{CDCl}_3$ )  $\delta$  170.0, 135.2, 129.3, 128.9, 127.2, 48.2, 44.0, 32.9, 25.4, 24.7. HRMS(ESI<sup>+</sup>) calculated for  $\text{C}_{14}\text{H}_{19}\text{NO}$   $[\text{M}+\text{Na}]^+$ : 240.1364; found: 240.1367.

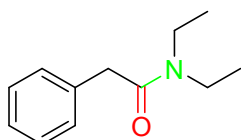

**N,N-diethyl-2-phenylacetamide (3be)**<sup>8</sup>, this compound was prepared according to General Procedure A for 12 h, Yield: 55% (21.2 mg), white solid, Mp: 57-59°C; <sup>1</sup>H NMR (400 MHz,

CDCl<sub>3</sub>)  $\delta$  7.36 – 7.28 (m, 2H), 7.28 – 7.23 (m, 3H), 3.70 (s, 2H), 3.39 (q,  $J = 7.1$  Hz, 2H), 3.30 (q,  $J = 7.1$  Hz, 2H), 1.15 – 1.06 (m, 6H). <sup>13</sup>C NMR (100 MHz, CDCl<sub>3</sub>)  $\delta$  170.2, 135.6, 128.6, 128.6, 126.7, 42.4, 40.9, 40.2, 14.2, 13.0. HRMS(ESI<sup>+</sup>) calculated for C<sub>12</sub>H<sub>17</sub>NO [M+Na]<sup>+</sup>: 214.1208; found: 214.1206.

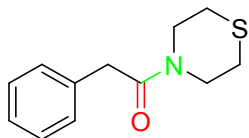

**2-phenyl-1-thiomorpholinoethan-1-one (3bf)**, this compound was prepared according to General Procedure A for 12 h, Yield: 55% (24.4 mg), yellow solid, Mp: 83 - 85°C; <sup>1</sup>H NMR (400 MHz, CDCl<sub>3</sub>)  $\delta$  7.33 (t,  $J = 7.3$  Hz, 2H), 7.24 (d,  $J = 7.6$  Hz, 3H), 3.92 – 3.87 (m, 2H), 3.73 (s, 2H), 3.71 – 3.68 (m, 2H), 2.60 – 2.55 (m, 2H), 2.33 – 2.28 (m, 2H). <sup>13</sup>C NMR (100 MHz, CDCl<sub>3</sub>)  $\delta$  169.5, 134.8, 128.9, 128.5, 127.0, 48.8, 44.4, 41.4, 27.5, 27.3. FTIR(KBr): 1649 cm<sup>-1</sup> (CH<sub>2</sub>CONR<sub>1</sub>R<sub>2</sub>), HRMS(ESI<sup>+</sup>) calculated for C<sub>12</sub>H<sub>15</sub>NOS [M+Na]<sup>+</sup>: 244.0772; found: 244.0769.

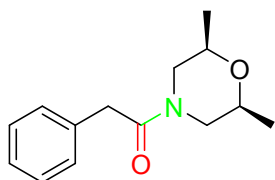

**1-((2S,6R)-2,6-dimethylmorpholino)-2-phenylethan-1-one (3bg)**, this compound was prepared according to General Procedure A for 12 h, Yield: 79% (37.0 mg), yellow liquid; <sup>1</sup>H NMR (400 MHz, CDCl<sub>3</sub>)  $\delta$  7.32 (t,  $J = 7.2$  Hz, 2H), 7.24 (t,  $J = 6.9$  Hz, 3H), 4.48 (d,  $J = 13.2$  Hz, 1H), 3.73 (s, 2H), 3.63 (d,  $J = 13.1$  Hz, 1H), 3.52 – 3.42 (m, 1H), 3.27 – 3.17 (m, 1H), 2.76 – 2.66 (m, 1H), 2.37 – 2.26 (m, 1H), 1.17 (d,  $J = 6.2$  Hz, 3H), 1.07 (d,  $J = 6.1$  Hz, 3H). <sup>13</sup>C NMR (100 MHz, CDCl<sub>3</sub>)  $\delta$  169.32 (s), 134.9, 128.8, 128.5, 126.9, 71.9, 71.6, 51.7, 47.2, 41.1, 18.7, 18.6. FTIR(thin film): 1644 cm<sup>-1</sup> (CH<sub>2</sub>CONR<sub>1</sub>R<sub>2</sub>), HRMS(ESI<sup>+</sup>) calculated for C<sub>14</sub>H<sub>19</sub>NO<sub>2</sub> [M+Na]<sup>+</sup>: 256.1313; found: 256.1317.

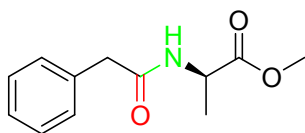

**(S)-Methyl 2-(2-phenylacetamido)propanoate (3bh)**, this compound was prepared according to General Procedure A for 12 h ( $\alpha$ -amino-esters was in the hydrochloride form), Yield: 83% (36.7 mg), yellow solid, Mp: 63 - 65°C; <sup>1</sup>H NMR (400 MHz, CDCl<sub>3</sub>) 7.36 (t,  $J = 7.0$  Hz, 2H), 7.29 (t,  $J = 8.1$  Hz, 3H), 6.07 (s, 1H), 4.58 (m,  $J = 7.2$  Hz, 1H), 3.71 (s, 3H), 3.59 (s, 2H), 1.34 (d,  $J = 7.1$  Hz, 3H). <sup>13</sup>C NMR (100 MHz, CDCl<sub>3</sub>)  $\delta$  173.4, 170.5, 134.6, 129.4, 129.0, 127.4, 52.4, 48.1, 43.6, 18.3.

FTIR(KBr): 1613  $\text{cm}^{-1}$  ( $\text{CH}_2\text{CONR}_1\text{R}_2$ ), HRMS(ESI<sup>+</sup>) calculated for  $\text{C}_{12}\text{H}_{15}\text{NO}_3$   $[\text{M}+\text{Na}]^+$ : 244.0950; found: 244.0952. HPLC (Chiral IC, n-hexane:isopropanol=75:25, flow rate = 1.0 mL/min),  $t_R$  = 11.893, 13.737 min, ee = 90%.

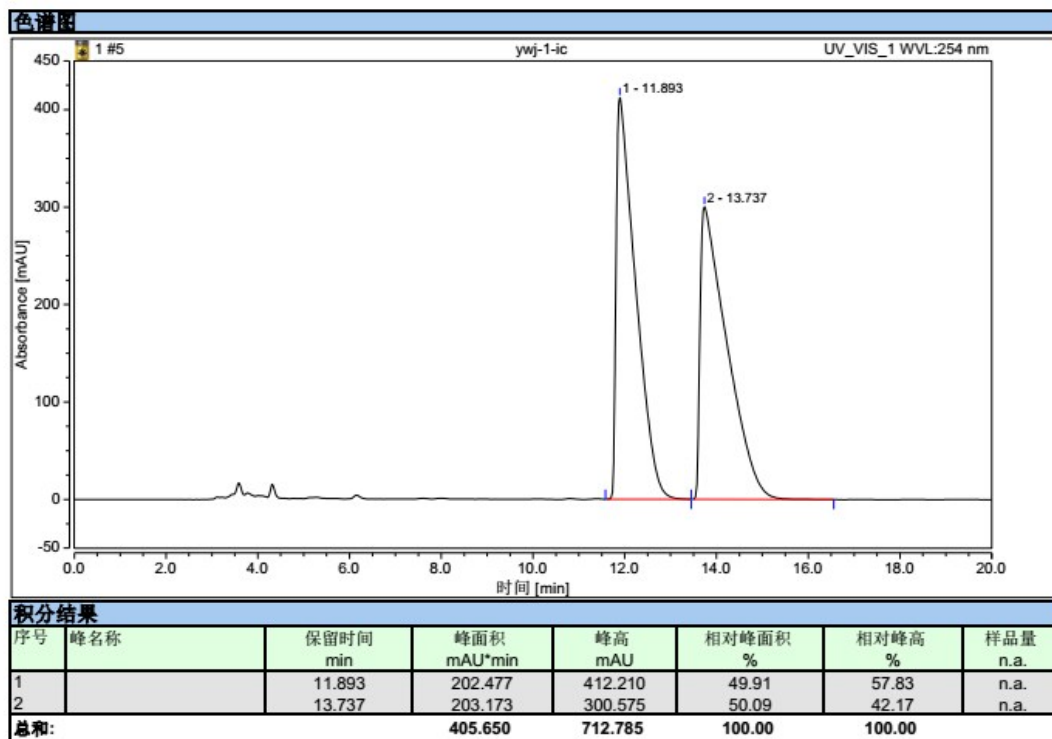

(Rac-HPLC spectrum)

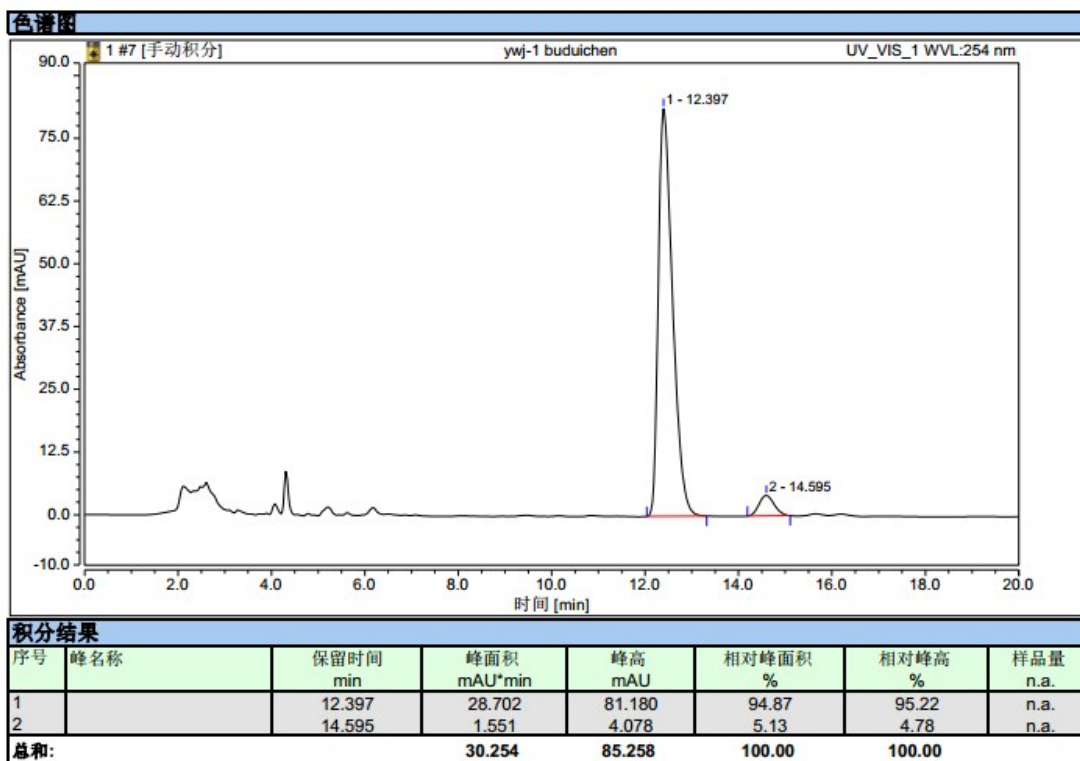

(3aj HPLC spectrum)

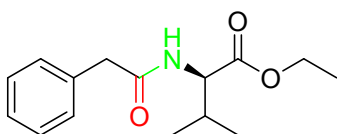

**(S)-Ethyl 3-methyl-2-(2-phenylacetamido)butanoate (3bi)**, this compound was prepared according to General Procedure A for 12 h ( $\alpha$ -amino-esters was in the hydrochloride form, equal dppf instead of  $\text{PPh}_3$ ), Yield: 42% (22.3 mg), yellow solid, Mp: 58 - 60°C;  $^1\text{H}$  NMR (400 MHz,  $\text{CDCl}_3$ )  $\delta$  7.36 (t,  $J = 9.7$ , 2H), 7.30 (t,  $J = 6.6$  Hz, 3H), 5.89 (d,  $J = 7.9$  Hz, 1H), 4.52 (dd,  $J = 8.8$ , 4.8 Hz, 1H), 4.21 – 4.09 (m, 2H), 3.62 (s, 2H), 2.16 – 2.05 (m, 1H), 1.24 (t,  $J = 7.1$  Hz, 3H), 0.86 (d,  $J = 6.9$  Hz, 3H), 0.77 (d,  $J = 6.9$  Hz, 3H).  $^{13}\text{C}$  NMR (100 MHz,  $\text{CDCl}_3$ )  $\delta$  171.8, 170.8, 134.8, 129.4, 129.1, 127.5, 61.2, 57.0, 43.8, 31.3, 18.9, 17.6, 14.2. FTIR(KBr): 1640  $\text{cm}^{-1}$  ( $\text{CH}_2\text{CONR}_1\text{R}_2$ ), HRMS(ESI $^+$ ) calculated for  $\text{C}_{12}\text{H}_{15}\text{NO}_3$  [ $\text{M}+\text{Na}$ ] $^+$ : 264.1600; found: 264.1601. HPLC (Chiral IC, n-hexane:isopropanol=75:25, flow rate = 1.0 mL/min), tR= 9.820, 10.957 min, ee = 100%.

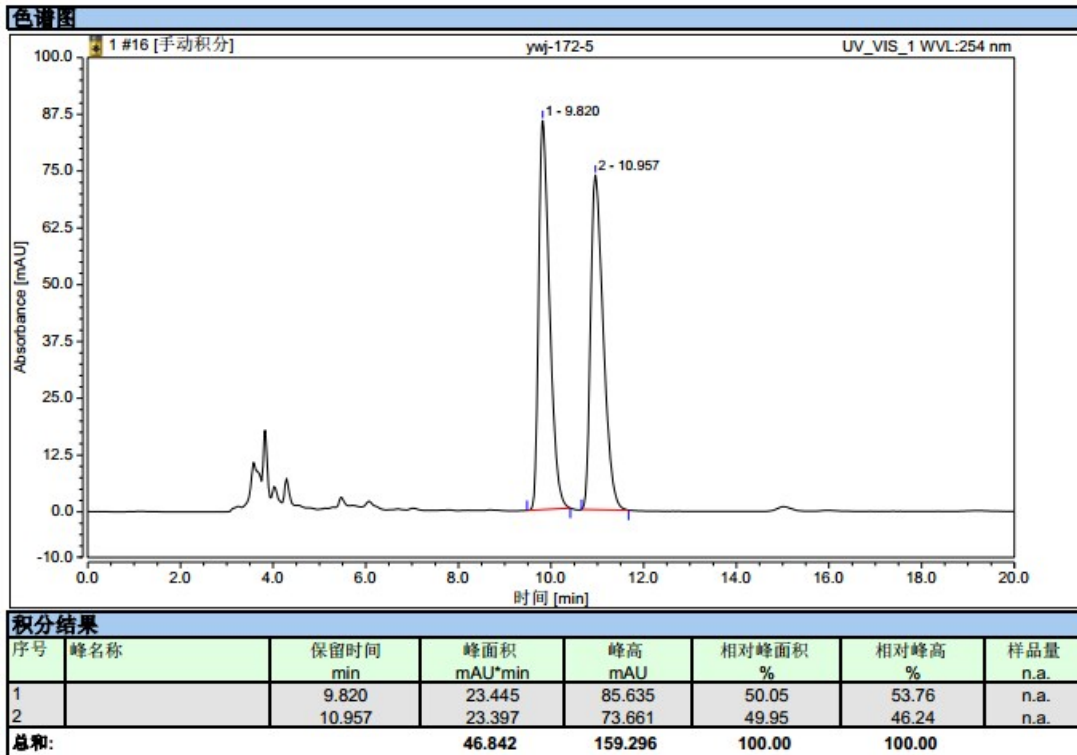

(Rac-HPLC spectrum)

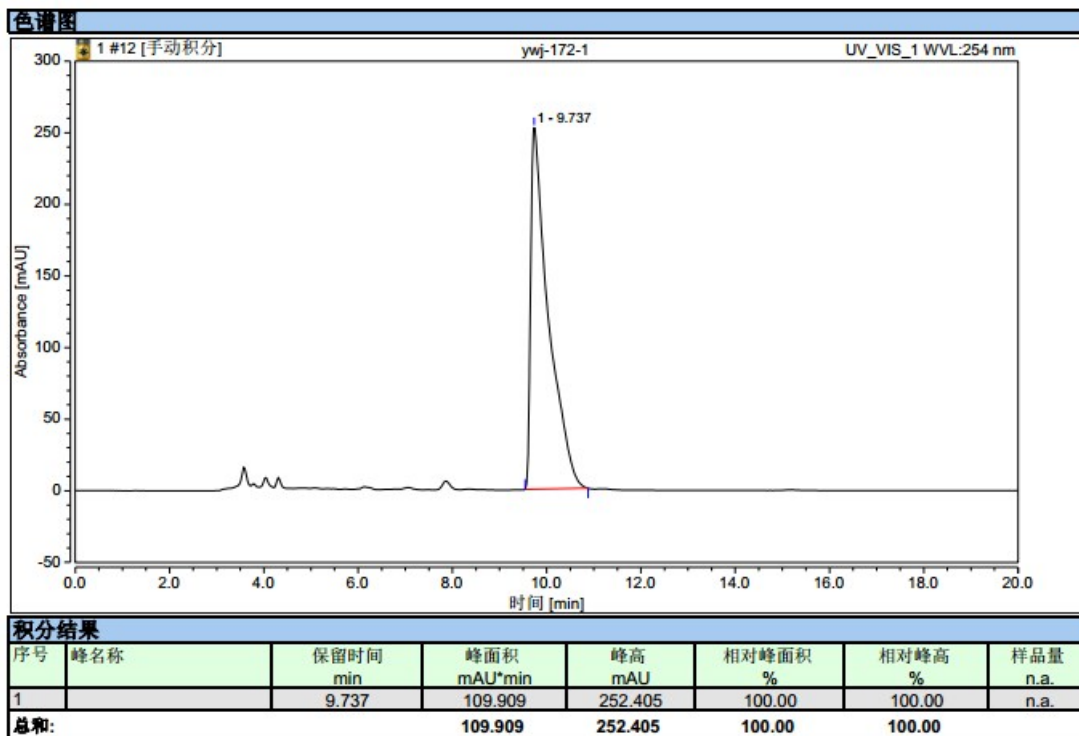

(3ak HPLC spectrum)

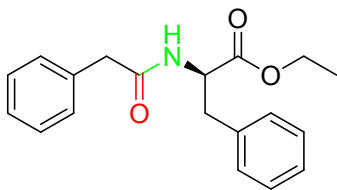

**(S)-Ethyl 3-phenyl-2-(2-phenylacetamido)propanoate (3bj)**, this compound was prepared according to General Procedure A for 16 h ( $\alpha$ -amino-esters was in the hydrochloride form, equal dppf instead of PPh<sub>3</sub>), Yield: 39% (22.9 mg), brown oil; <sup>1</sup>H NMR (400 MHz, CDCl<sub>3</sub>)  $\delta$  7.36 – 7.28 (m, 3H), 7.21 – 7.16 (m, 5H), 6.91 (dd,  $J$  = 6.5, 3.0 Hz, 2H), 5.84 (d,  $J$  = 7.3 Hz, 1H), 4.87 – 4.79(m, 1H), 4.13 (q,  $J$  = 7.1 Hz, 2H), 3.55 (s, 2H), 3.10 – 2.97 (m, 2H), 1.21 (t,  $J$  = 7.2 Hz, 3H). <sup>13</sup>C NMR (100 MHz, CDCl<sub>3</sub>)  $\delta$  171.3, 170.4, 135.7, 134.5, 129.4, 129.2, 129.0, 128.5, 127.4, 127.0, 61.5, 53.0, 43.7, 37.7, 14.1. FTIR(KBr): 1655 cm<sup>-1</sup> (CH<sub>2</sub>C=O, N-H), HRMS(ESI<sup>+</sup>) calculated for C<sub>12</sub>H<sub>15</sub>NO<sub>3</sub> [M+H]<sup>+</sup>: 312.1600; found: 312.1594. HPLC (Chiral IC, n-hexane:isopropanol=75:25, flow rate = 1.0 mL/min), tR= 12.820, 17.343 min, ee = 94%.

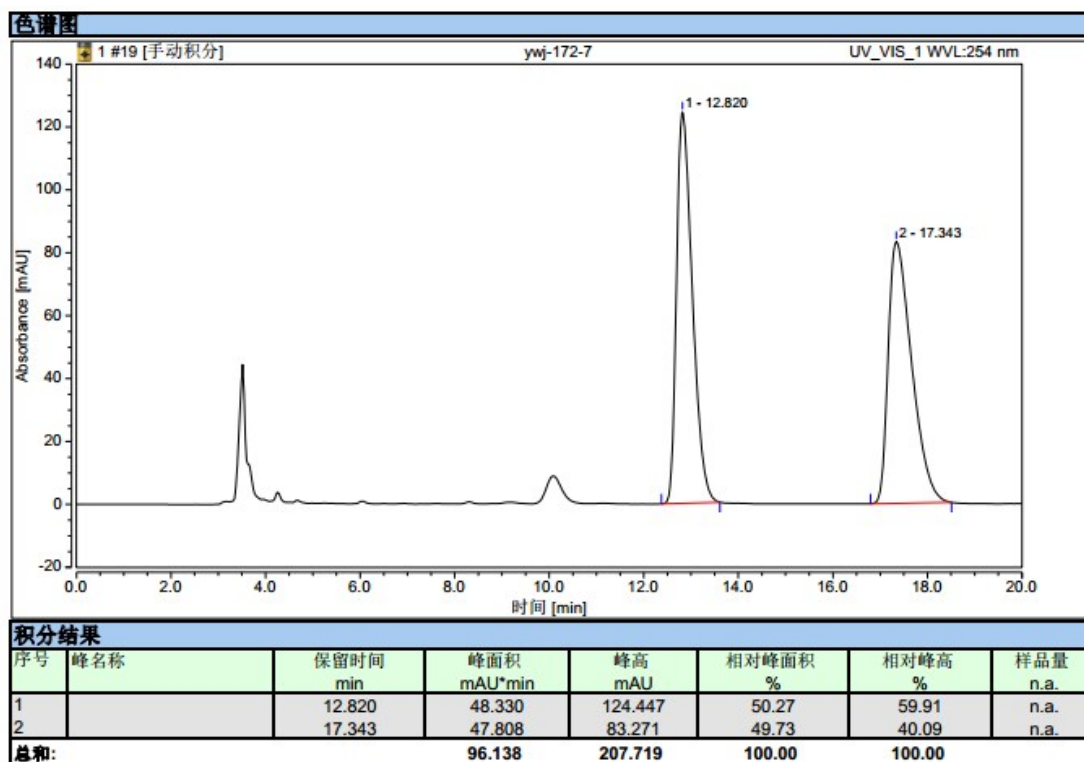

(Rac-HPLC spectrum)

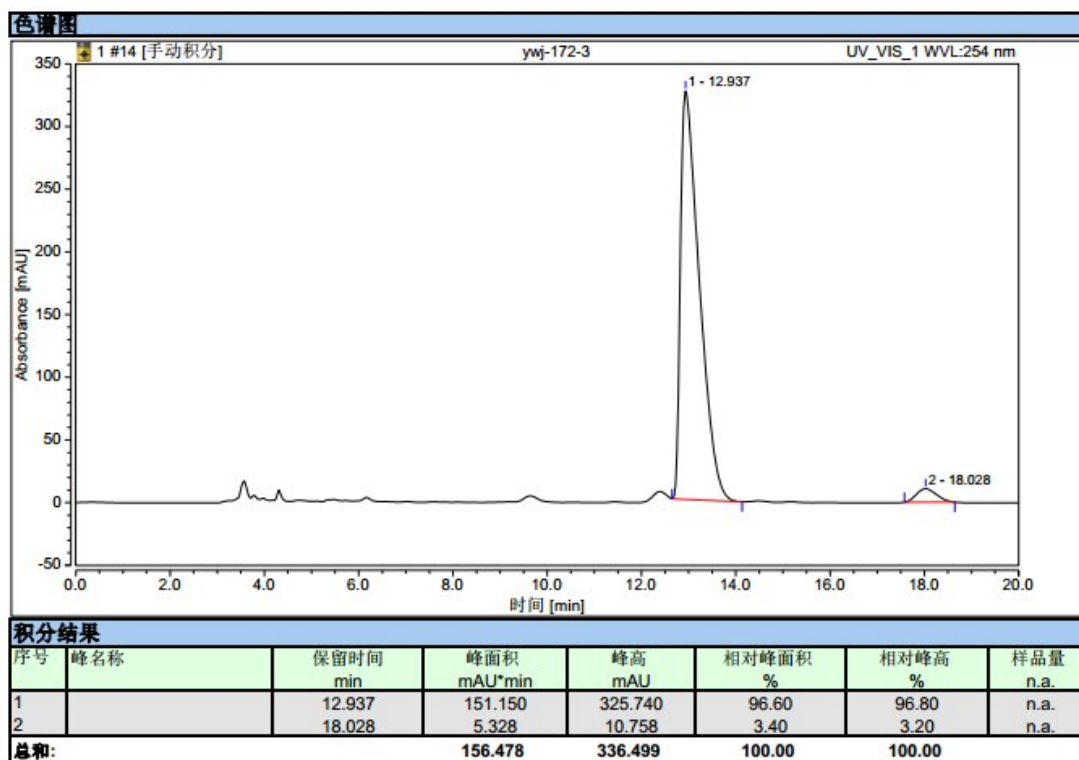

(3al HPLC spectrum)

## Part 6.Characterization of carbonylation products of esters (reaction with alcohols) (5aa—5ay)

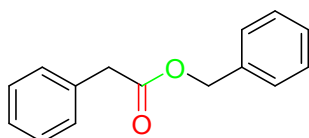

**Benzyl 2-phenylacetate (5aa)**<sup>[102-16-9]</sup>, this compound was prepared according to General Procedure B for 12 h, Yield: 82% (36.7 mg), light yellow liquid; <sup>1</sup>H NMR (400 MHz, CDCl<sub>3</sub>) δ 7.46 – 7.06 (m, 10H), 5.12 (s, 2H), 3.66 (s, 2H). <sup>13</sup>C NMR (100 MHz, CDCl<sub>3</sub>) δ 171.4, 135.9, 133.9, 129.3, 128.6, 128.6, 128.2, 128.1, 127.2, 66.6, 41.4. HRMS(ESI<sup>+</sup>) calculated for C<sub>15</sub>H<sub>14</sub>O<sub>2</sub> [M+Na<sup>+</sup>] 249.0891, found 249.0890.

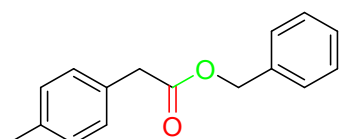

**Benzyl 2-(p-tolyl)acetate (5ab)**, this compound was prepared according to General Procedure B for 10 h, Yield: 86% (41.2 mg), light green liquid; <sup>1</sup>H NMR (400 MHz, CDCl<sub>3</sub>) δ 7.36 – 7.26 (m, 5H), 7.14 (m, 4H), 5.11 (s, 2H), 3.62 (s, 2H), 2.32 (s, 3H). <sup>13</sup>C NMR (100 MHz, CDCl<sub>3</sub>) δ 171.7, 136.8,

136.0, 130.9, 129.3, 129.2, 128.6, 128.2, 128.2, 66.6, 41.0, 21.1. FTIR(thin film): 1738  $\text{cm}^{-1}$  ( $\text{CH}_2\text{COOR}$ ); HRMS(ESI<sup>+</sup>) calculated for  $\text{C}_{16}\text{H}_{16}\text{O}_2$  [ $\text{M}+\text{H}^+$ ] 241.1229, found 241.1220.

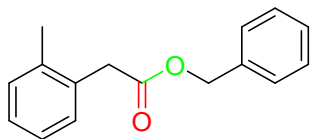

**Benzyl 2-(o-tolyl)acetate (5ac)**, Yield: 86% (41.1 mg), this compound was prepared according to General Procedure B for 10 h, light green liquid; <sup>1</sup>H NMR (400 MHz,  $\text{CDCl}_3$ )  $\delta$  7.37 – 7.26 (m, 5H), 7.24 – 7.12 (m, 4H), 5.14 (s, 2H), 3.67 (s, 2H), 2.28 (s, 3H). <sup>13</sup>C NMR (100 MHz,  $\text{CDCl}_3$ )  $\delta$  171.3, 136.9, 136.0, 132.7, 130.4, 130.2, 128.5, 128.2, 128.1, 127.5, 126.2, 66.6, 39.2, 19.6. FTIR(thin film): 1739  $\text{cm}^{-1}$  ( $\text{CH}_2\text{COOR}$ ); HRMS(ESI<sup>+</sup>) calculated for  $\text{C}_{16}\text{H}_{16}\text{O}_2$  [ $\text{M}+\text{H}^+$ ] 241.1229, found 241.1223.

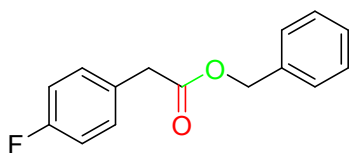

**Benzyl 2-(4-fluorophenyl)acetate (5ad)**, this compound was prepared according to General Procedure B for 12 h, Yield: 82% (39.9 mg), light green liquid; <sup>1</sup>H NMR (400 MHz,  $\text{CDCl}_3$ )  $\delta$  7.37 – 7.28 (m, 5H), 7.36 – 7.21 (m, 2H), 6.99 (t,  $J = 8.7$  Hz, 2H), 5.13 (s, 2H), 3.63 (s, 2H). <sup>13</sup>C NMR (100 MHz,  $\text{CDCl}_3$ )  $\delta$  171.3, 162.1 (d,  $J_{\text{C-F}} = 245.4$  Hz), 135.8, 130.9 (d,  $J_{\text{C-F}} = 8.0$  Hz), 129.7 (d,  $J_{\text{C-F}} = 3.3$  Hz), 128.6, 128.3, 128.2, 115.4 (d,  $J_{\text{C-F}} = 21.5$  Hz), 66.8, 40.5. FTIR(thin film): 1731  $\text{cm}^{-1}$  ( $\text{CH}_2\text{COOR}$ ); HRMS(ESI<sup>+</sup>) calculated for  $\text{C}_{15}\text{H}_{13}\text{FO}_2$  [ $\text{M}+\text{H}^+$ ] 245.0978, found 245.0972.

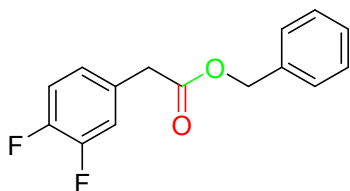

**Benzyl 2-(3,4-difluorophenyl)acetate (5ae)**, this compound was prepared according to General Procedure B for 12 h, Yield: 81% (47.7 mg), light yellow liquid; <sup>1</sup>H NMR (400 MHz,  $\text{CDCl}_3$ )  $\delta$  7.37 – 7.29 (m, 5H), 7.14 – 7.04 (m, 2H), 7.00 – 6.95 (m, 1H), 5.13 (s, 2H), 3.61 (s, 2H). <sup>13</sup>C NMR (100 MHz,  $\text{CDCl}_3$ )  $\delta$  170.7, 151.18 (dd,  $J_{\text{C-F}} = 51.6, 12.7$  Hz), 148.71 (dd,  $J_{\text{C-F}} = 50.9, 12.7$  Hz), 135.6, 130.7 (dd,  $J_{\text{C-F}} = 50.9, 6.1$  Hz), 128.6, 128.4, 128.3, 125.4 (dd,  $J_{\text{C-F}} = 6.2, 3.7$  Hz), 118.4 (d,  $J_{\text{C-F}} = 17.7$  Hz), 117.3 (d,  $J_{\text{C-F}} = 17.4$  Hz), 66.9, 40.3 (d,  $J_{\text{C-F}} = 1.2$  Hz). FTIR(thin film): 1738  $\text{cm}^{-1}$  ( $\text{CH}_2\text{COOR}$ ); HRMS(ESI<sup>+</sup>) calculated for  $\text{C}_{15}\text{H}_{12}\text{F}_2\text{O}_2$  [ $\text{M}+\text{Na}^+$ ] 285.0703, found 285.0695.

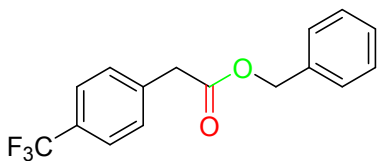



**Benzyl 2-(4-(trifluoromethyl)phenyl)acetate (5af)**, this compound was prepared according to General Procedure B for 10 h, Yield: 80% (47.1 mg), light yellow liquid;  $^1\text{H}$  NMR (400 MHz,  $\text{CDCl}_3$ )  $\delta$  7.57 (d,  $J = 8.1$  Hz, 2H), 7.39 (d,  $J = 8.1$  Hz, 2H), 7.36 – 7.27 (m, 5H), 5.14 (s, 2H), 3.72 (s, 2H).  $^{13}\text{C}$  NMR (100 MHz,  $\text{CDCl}_3$ )  $\delta$  171.2, 139.9 (d,  $J_{\text{C-F}} = 4.8$  Hz), 133.7, 130.4 (q,  $J_{\text{C-F}} = 32.5$  Hz), 129.3, 128.7, 128.0, 127.3, 125.5 (q,  $J_{\text{C-F}} = 3.8$  Hz), 124.1 (q,  $J_{\text{C-F}} = 272.1$  Hz), 65.6, 41.4. FTIR(thin film):  $1731\text{ cm}^{-1}$  ( $\text{CH}_2\text{COOR}$ ); HRMS(ESI $^+$ ) calculated for  $\text{C}_{16}\text{H}_{13}\text{F}_3\text{O}_2$  [ $\text{M}+\text{H}^+$ ] 295.0946, found 295.0940.

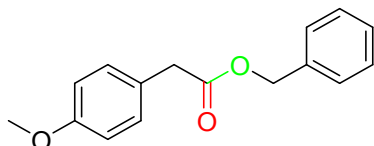

**Benzyl 2-(4-methoxyphenyl)acetate (5ag)**, this compound was prepared according to General Procedure B for 14 h, Yield: 62% (31.8 mg), colorless liquid;  $^1\text{H}$  NMR (400 MHz,  $\text{CDCl}_3$ )  $\delta$  7.37 – 7.28 (m, 5H), 7.20 (d,  $J = 8.7$  Hz, 2H), 6.85(d,  $J = 8.8$  Hz, 2H), 5.12 (s, 2H), 3.79 (s, 3H), 3.60 (s, 2H).  $^{13}\text{C}$  NMR (100 MHz,  $\text{CDCl}_3$ )  $\delta$  171.8, 158.8, 136.0, 130.4, 128.6, 128.2, 128.2, 126.0, 114.1, 66.6, 55.3, 40.5. FTIR(thin film):  $1735\text{ cm}^{-1}$  ( $\text{CH}_2\text{COOR}$ ); HRMS(ESI $^+$ ) calculated for  $\text{C}_{16}\text{H}_{16}\text{O}_3$  [ $\text{M}+\text{H}^+$ ] 257.1178, found 257.1178.

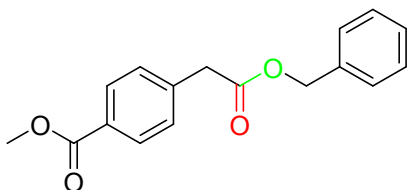

**Methyl 4-(2-(benzyloxy)-2-oxoethyl)benzoate (5ah)**, this compound was prepared according to General Procedure B for 12 h, Yield: 66% (37.1 mg), colorless liquid;  $^1\text{H}$  NMR (400 MHz,  $\text{CDCl}_3$ )  $\delta$  7.99(d,  $J = 8.4$  Hz, 2H), 7.41 – 7.28 (m, 7H), 5.14 (s, 2H), 3.90 (s, 3H), 3.72 (s, 2H).  $^{13}\text{C}$  NMR (100 MHz,  $\text{CDCl}_3$ )  $\delta$  170.7, 166.9, 139.0, 135.7, 129.9, 129.4, 129.1, 128.6, 128.4, 128.2, 66.9, 52.1, 41.3. FTIR(thin film):  $1740\text{ cm}^{-1}$  ( $\text{CH}_2\text{COOR}$ ); HRMS(ESI $^+$ ) calculated for  $\text{C}_{17}\text{H}_{16}\text{O}_4$  [ $\text{M}+\text{H}^+$ ] 285.1127, found 285.1131.

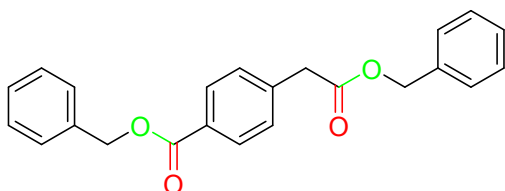

**Benzyl-4-(2-(benzyloxy)-2-oxoethyl)benzoate (5ai)**, this compound was prepared according to General Procedure B for 16 h, Yield: 40%/45%, (27.5 mg/ 30.8), from 4-chloro/bromo benzylic ammonium salts, yellow liquid;  $^1\text{H}$  NMR (400 MHz,  $\text{CDCl}_3$ )  $\delta$  8.03 (d,  $J = 8.3$  Hz, 2H), 7.49 – 7.18 (m, 12H), 5.35 (s, 2H), 5.13 (s, 2H), 3.71 (s, 2H).  $^{13}\text{C}$  NMR (100 MHz,  $\text{CDCl}_3$ )  $\delta$  170.6, 166.2, 139.2, 136.1, 135.7, 130.0, 129.4, 129.1, 128.6, 128.6, 128.4, 128.3, 128.2, 128.2, 66.9, 66.7, 41.3.

FTIR(thin film): 1731  $\text{cm}^{-1}$  ( $\text{CH}_2\text{COOR}$ ); HRMS(ESI<sup>+</sup>) calculated for  $\text{C}_{23}\text{H}_{20}\text{O}_4$  [ $\text{M}+\text{Na}^+$ ] 383.1259, found 383.1261.

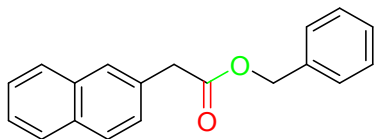

**Benzyl 2-(naphthalen-2-yl)acetate (5aj)**, this compound was prepared according to General Procedure B for 16 h, Yield: 47% (25.9 mg), light yellow liquid; <sup>1</sup>H NMR (400 MHz,  $\text{CDCl}_3$ )  $\delta$  7.83 – 7.76 (m, m, 3H), 7.72 (s, 1H), 7.47 – 7.39 (m, 3H), 7.36 – 7.29 (m, 5H), 5.15 (s, 2H), 3.83 (s, 2H). <sup>13</sup>C NMR (100 MHz,  $\text{CDCl}_3$ )  $\delta$  171.4, 135.9, 133.5, 132.6, 131.4, 128.6, 128.3, 128.2, 128.1, 127.7, 127.7, 127.4, 126.2, 125.9, 66.8, 41.6. FTIR(thin film): 1731  $\text{cm}^{-1}$  ( $\text{CH}_2\text{COOR}$ ); HRMS(ESI<sup>+</sup>) calculated for  $\text{C}_{19}\text{H}_{16}\text{O}_2$  [ $\text{M}+\text{H}^+$ ] 277.1229, found 277.1236.

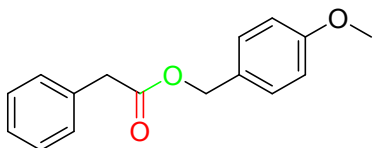

**4-methoxybenzyl 2-phenylacetate (5ak)**, this compound was prepared according to General Procedure B for 12 h, Yield: 57% (29.2 mg), yellow liquid; <sup>1</sup>H NMR (400 MHz,  $\text{CDCl}_3$ )  $\delta$  7.35 – 7.22 (m, 7H), 6.87 (d,  $J$  = 8.5 Hz, 2H), 5.06 (s, 2H), 3.79 (s, 3H), 3.62 (s, 2H). <sup>13</sup>C NMR (100 MHz,  $\text{CDCl}_3$ )  $\delta$  171.5, 159.7, 134.0, 130.0, 129.3, 128.6, 128.0, 127.1, 114.0, 66.5, 55.3, 41.4. FTIR(thin film): 1740  $\text{cm}^{-1}$  ( $\text{CH}_2\text{COOR}$ ); HRMS(ESI<sup>+</sup>) calculated for  $\text{C}_{16}\text{H}_{16}\text{O}_2$  [ $\text{M}+\text{H}^+$ ] 257.1178, found 257.1180.

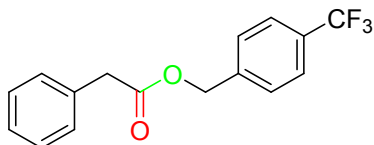

**4-(trifluoromethyl)benzyl 2-phenylacetate (5al)**, this compound was prepared according to General Procedure B for 10 h, Yield: 79% (46.7 mg), yellow liquid; <sup>1</sup>H NMR (400 MHz,  $\text{CDCl}_3$ )  $\delta$  7.58 (d,  $J$  = 8.1 Hz, 2H), 7.38 (d,  $J$  = 8.0 Hz, 2H), 7.36 – 7.24 (m, 5H), 5.17 (s, 2H), 3.69 (s, 2H). <sup>13</sup>C NMR (100 MHz,  $\text{CDCl}_3$ ) 171.2, 139.9 (d,  $J_{\text{C-F}}$  = 1.2 Hz), 133.7, 130.4 (d,  $J_{\text{C-F}}$  = 32.5 Hz), 129.3, 128.7, 128.0, 127.3, 125.5 (q,  $J_{\text{C-F}}$  = 3.8 Hz), 124.1 (d,  $J_{\text{C-F}}$  = 272.1 Hz), 65.6, 41.4. FTIR(thin film): 1729  $\text{cm}^{-1}$  ( $\text{CH}_2\text{COOR}$ ); HRMS(ESI<sup>+</sup>) calculated for  $\text{C}_{16}\text{H}_{13}\text{F}_3\text{O}_2$  [ $\text{M}+\text{H}^+$ ] 295.0946, found 295.0950.

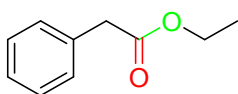

**Ethyl 2-phenylacetate (5am)**, this compound was prepared according to General Procedure B for 16 h, Yield: 48% (15.8 mg), 20 mol% xantphos extra added, <sup>1</sup>H NMR (400 MHz,  $\text{CDCl}_3$ )  $\delta$  7.53 – 6.97

(m, 4H), 4.14 (q,  $J = 7.1$  Hz, 2H), 3.61 (s, 2H), 1.24 (t,  $J = 7.1$  Hz, 3H). FTIR(thin film):  $1738\text{ cm}^{-1}$  ( $\text{CH}_2\text{COOR}$ );  $^{13}\text{C}$  NMR (100 MHz,  $\text{CDCl}_3$ )  $\delta$  171.6, 134.2, 129.3, 128.6, 127.0, 60.9, 41.5, 14.2. HRMS( $\text{ESI}^+$ ) calculated for  $\text{C}_{10}\text{H}_{12}\text{O}_2$  [ $\text{M}+\text{Na}^+$ ] 187.0735, found 187.0739.

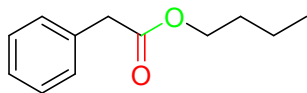

**Butyl 2-phenylacetate (5an)**, this compound was prepared according to General Procedure B For 12 h, Yield: 54% (21.1 mg), yellow liquid;  $^1\text{H}$  NMR (400 MHz,  $\text{CDCl}_3$ )  $\delta$  7.34 – 7.25 (m, 5H), 4.09 (t,  $J = 6.7$  Hz, 2H), 3.61 (s, 2H), 1.62 – 1.54(m, 4H), 1.38 – 1.31(m, 2H), 0.91 (t,  $J = 7.4$  Hz, 3H).  $^{13}\text{C}$  NMR (100 MHz,  $\text{CDCl}_3$ )  $\delta$  171.8, 134.3, 129.3, 128.6, 127.1, 64.8, 41.5, 30.7, 19.1, 13.7. FTIR(thin film):  $1736\text{ cm}^{-1}$  ( $\text{CH}_2\text{COOR}$ ); HRMS( $\text{ESI}^+$ ) calculated for  $\text{C}_{12}\text{H}_{16}\text{O}_2$  [ $\text{M}+\text{Na}^+$ ] 215.1048, found 215.1043.

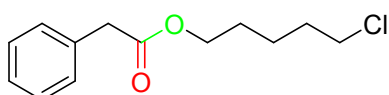

**5-chloropentyl 2-phenylacetate (5ao)**, this compound was prepared according to General Procedure B for 10 h, Yield: 61% (26.3 mg), yellow liquid;  $^1\text{H}$  NMR (400 MHz,  $\text{CDCl}_3$ )  $\delta$  7.35 – 7.25 (m, 5H), 4.10 (t,  $J = 6.5$  Hz, 2H), 3.61 (s, 2H), 3.49 (t,  $J = 6.6$  Hz, 2H), 1.80 – 1.71 (m, 2H), 1.69 – 1.61 (m, 2H), 1.51 – 1.42 (m, 2H).  $^{13}\text{C}$  NMR (100 MHz,  $\text{CDCl}_3$ )  $\delta$  171.6, 134.1, 129.3, 128.6, 127.1, 64.6, 44.8, 41.5, 32.1, 27.9, 23.3. FTIR(thin film):  $1736\text{ cm}^{-1}$  ( $\text{CH}_2\text{COOR}$ ); HRMS( $\text{ESI}^+$ ) calculated for  $\text{C}_{13}\text{H}_{17}\text{ClO}_2$  [ $\text{M}+\text{H}^+$ ] 241.0995, found 241.0990.

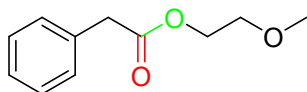

**2-methoxyethyl 2-phenylacetate (5ap)**, this compound was prepared according to General Procedure B for 10 h, Yield: 59% (22.9 mg), yellow liquid;  $^1\text{H}$  NMR (400 MHz,  $\text{CDCl}_3$ )  $\delta$  7.35 – 7.24 (m, 5H), 4.25 (t,  $J = 5.4$ , 2H), 3.66 (s, 2H), 3.58 (t,  $J = 4.1$  Hz, 2H), 3.36 (s, 3H).  $^{13}\text{C}$  NMR (100 MHz,  $\text{CDCl}_3$ )  $\delta$  171.6, 134.0, 129.3, 128.6, 127.1, 70.4, 63.9, 59.0, 41.2. FTIR(thin film):  $1737\text{ cm}^{-1}$  ( $\text{CH}_2\text{COOR}$ ); HRMS( $\text{ESI}^+$ ) calculated for  $\text{C}_{11}\text{H}_{14}\text{O}_3$  [ $\text{M}+\text{Na}^+$ ] 263.0841, found 263.0835.

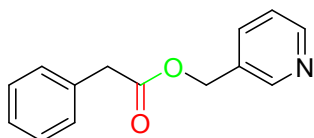

**Pyridin-3-ylmethyl 2-phenylacetate (5aq)**, this compound was prepared according to General Procedure B for 12 h, Yield: 65% (29.5 mg), yellow liquid;  $^1\text{H}$  NMR (400 MHz,  $\text{CDCl}_3$ )  $\delta$  8.60 – 8.53 (m, 2H), 7.68 – 7.59 (m, 1H), 7.37 – 7.22 (m, 6H), 5.14 (s, 2H), 3.67 (s, 2H).  $^{13}\text{C}$  NMR (100

MHz, CDCl<sub>3</sub>)  $\delta$  171.2, 149.5, 149.4, 136.0, 133.6, 131.6, 129.2, 128.7, 127.3, 123.5, 64.0, 41.3. FTIR(thin film): 1738 cm<sup>-1</sup> (CH<sub>2</sub>COOR); HRMS(ESI<sup>+</sup>) calculated for C<sub>14</sub>H<sub>13</sub>NO<sub>2</sub> [M+H<sup>+</sup>] 228.1025, found 228.1019.

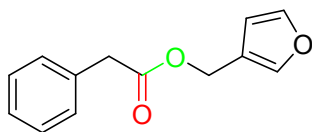

**Furan-3-ylmethyl 2-phenylacetate (5ar)**, this compound was prepared according to General Procedure B for 12 h, Yield: 54% (24.1 mg), yellow liquid; <sup>1</sup>H NMR (400 MHz, CDCl<sub>3</sub>)  $\delta$  7.42 (d, *J* = 0.6 Hz, 1H), 7.37 (d, *J* = 1.5 Hz, 1H), 7.34 – 7.25 (m, 5H), 6.39 (s, 1H), 5.00 (s, 2H), 3.63 (s, 2H). <sup>13</sup>C NMR (100 MHz, CDCl<sub>3</sub>)  $\delta$  171.4, 143.4, 141.6, 133.9, 129.3, 128.6, 127.2, 120.4, 110.5, 58.2, 41.3. FTIR(thin film): 1738 cm<sup>-1</sup> (CH<sub>2</sub>COOR); HRMS(ESI<sup>+</sup>) calculated for C<sub>13</sub>H<sub>12</sub>O<sub>3</sub> [M+H<sup>+</sup>] 217.0865, found 217.0866.

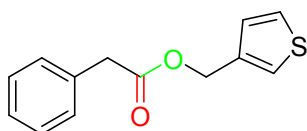

**Thiophen-3-ylmethyl 2-phenylacetate (5as)**, this compound was prepared according to General Procedure B for 12 h, Yield: 63% (29.2 mg), yellow liquid; <sup>1</sup>H NMR (400 MHz, CDCl<sub>3</sub>)  $\delta$  7.35 – 7.25 (m, 6H), 7.23 (s, 2H), 7.03 (d, *J* = 4.9 Hz, 1H), 5.12 (s, 2H), 3.64 (s, 2H). <sup>13</sup>C NMR (100 MHz, CDCl<sub>3</sub>)  $\delta$  171.4, 136.7, 133.9, 129.3, 128.6, 127.5, 127.2, 126.2, 124.2, 61.7, 41.3. FTIR(thin film): 1736 cm<sup>-1</sup> (CH<sub>2</sub>COOR); HRMS(ESI<sup>+</sup>) calculated for C<sub>13</sub>H<sub>12</sub>O<sub>2</sub>S[M+Na<sup>+</sup>] 255.0456, found 255.0450.

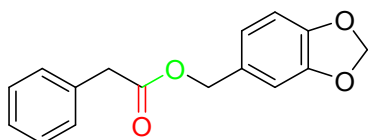

**Benzo[d][1,3]dioxol-5-ylmethyl 2-phenylacetate (5at)**, this compound was prepared according to General Procedure B for 10 h, Yield: 74% (37.1 mg), yellow solid; Mp: 112-114 °C, <sup>1</sup>H NMR (400 MHz, CDCl<sub>3</sub>)  $\delta$  7.34 – 7.24 (m, 5H), 6.81– 6.74 (m, 3H), 5.94 (s, 2H), 5.02 (s, 2H), 3.64 (s, 2H). <sup>13</sup>C NMR (100 MHz, CDCl<sub>3</sub>)  $\delta$  171.4, 147.9, 147.7, 134.0, 129.7, 129.3, 128.6, 127.2, 122.2, 109.0, 108.3, 101.2, 66.6, 41.4. FTIR(KBr): 1736 cm<sup>-1</sup> (CH<sub>2</sub>COOR); HRMS(ESI<sup>+</sup>) calculated for C<sub>16</sub>H<sub>14</sub>O<sub>3</sub> [M+Na<sup>+</sup>] 277.0841, found 277.0838.

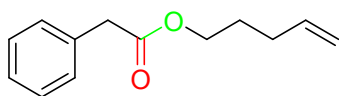

**Pent-4-en-1-yl 2-phenylacetate (5au)**, this compound was prepared according to General Procedure B for 10 h, Yield: 80% (32.6 mg), yellow liquid; <sup>1</sup>H NMR (400 MHz, CDCl<sub>3</sub>)  $\delta$  7.36 – 7.25 (m, 5H),

5.83 – 5.70 (m, 1H), 5.03 – 4.93 (m, 2H), 4.10 (t,  $J = 9.0$  Hz, 2H), 3.61 (s, 2H), 2.07 (dd,  $J = 14.3, 7.3$  Hz, 2H), 1.76 – 1.57 (m, 3H).  $^{13}\text{C}$  NMR (100 MHz,  $\text{CDCl}_3$ )  $\delta$  171.6, 137.5, 134.2, 129.3, 128.6, 127.1, 115.3, 64.3, 41.5, 30.0, 27.9. FTIR(thin film):  $1761\text{ cm}^{-1}$  ( $\text{CH}_2\text{COOR}$ ); HRMS(ESI $^+$ ) calculated for  $\text{C}_{13}\text{H}_{16}\text{O}_2$  [ $\text{M}+\text{Na}^+$ ] 227.1048, found 227.1043.

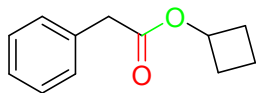

**Cyclobutyl 2-phenylacetate (5av)**, this compound was prepared according to General Procedure B for 10 h, Yield: 77% (29.1 mg), colorless liquid;  $^1\text{H}$  NMR (400 MHz,  $\text{CDCl}_3$ )  $\delta$  7.42 – 7.20 (m, 5H), 5.07 – 4.83 (m, 1H), 3.58 (s, 2H), 2.44 – 2.26 (m, 2H), 2.09 – 1.58 (m, 2H).  $^{13}\text{C}$  NMR (100 MHz,  $\text{CDCl}_3$ )  $\delta$  171.0, 134.2, 129.3, 128.6, 127.0, 69.3, 41.4, 30.3, 13.6. FTIR(thin film):  $1736\text{ cm}^{-1}$  ( $\text{CH}_2\text{COOR}$ ); HRMS(ESI $^+$ ) calculated for  $\text{C}_{12}\text{H}_{14}\text{O}_2$  [ $\text{M}+\text{Na}^+$ ] 213.0891, found 213.0886.

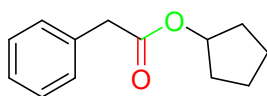

**Cyclopentyl 2-phenylacetate (5aw)**, this compound was prepared according to General Procedure B for 12 h, Yield: 61% (24.8 mg), colorless liquid;  $^1\text{H}$  NMR (400 MHz,  $\text{CDCl}_3$ )  $\delta$  7.37 – 7.18 (m, 5H), 5.24 – 5.13 (m, 1H), 3.57 (s, 2H), 1.89 – 1.78 (m, 2H), 1.72 – 1.62 (m, 4H), 1.60 – 1.54 (m, 2H).  $^{13}\text{C}$  NMR (100 MHz,  $\text{CDCl}_3$ )  $\delta$  171.4, 134.4, 129.2, 128.5, 127.0, 77.6, 41.8, 32.7, 23.7. FTIR (thin film):  $1734\text{ cm}^{-1}$  ( $\text{CH}_2\text{COOR}$ ); HRMS(ESI $^+$ ) calculated for  $\text{C}_{13}\text{H}_{16}\text{O}_2$  [ $\text{M}+\text{Na}^+$ ] 227.1048, found 227.1047.

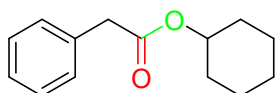

**Cyclohexyl 2-phenylacetate (5ax)**, this compound was prepared according to General Procedure B for 12 h, Yield: 66% (28.6 mg), colorless liquid;  $^1\text{H}$  NMR (400 MHz,  $\text{CDCl}_3$ )  $\delta$  7.36 – 7.21 (m, 5H), 4.81 – 4.73 (m, 1H), 3.59 (s, 2H), 1.86 – 1.77 (m, 2H), 1.74 – 1.64 (m, 2H), 1.55 – 1.25 (m, 6H).  $^{13}\text{C}$  NMR (100 MHz,  $\text{CDCl}_3$ )  $\delta$  171.1, 134.5, 129.2, 128.5, 127.0, 73.1, 41.9, 31.6, 25.4, 23.7. FTIR(thin film):  $1732\text{ cm}^{-1}$  ( $\text{CH}_2\text{COOR}$ ); HRMS(ESI $^+$ ) calculated for  $\text{C}_{14}\text{H}_{18}\text{O}_2$  [ $\text{M}+\text{H}^+$ ] 219.1385, found 219.1385.

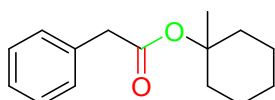

**1-methylcyclohexyl 2-phenylacetate (5ay)**, this compound was prepared according to General Procedure B for 16 h, Yield: 20% (9.4 mg), colorless liquid;  $^1\text{H}$  NMR (400 MHz,  $\text{CDCl}_3$ )  $\delta$  7.33 – 7.31 (m, 3H), 7.29 (d,  $J = 2.6$  Hz, 2H), 3.58 (s, 2H), 1.47 (s, 3H), 1.46 – 1.27 (m, 10H).  $^{13}\text{C}$  NMR (100 MHz,  $\text{CDCl}_3$ )  $\delta$  170.8, 134.9, 129.4, 128.5, 126.9, 82.4, 43.0, 36.6, 25.6, 25.4, 22.0. FTIR(thin

film): 1731  $\text{cm}^{-1}$  ( $\text{CH}_2\text{COOR}$ ); HRMS( $\text{ESI}^+$ ) calculated for  $\text{C}_{15}\text{H}_{20}\text{O}_2[\text{M}+\text{Na}^+]$  255.1361, found 255.1364.

### Part 7.Characterization of carbonylation products of esters (reaction with phenols) (7aa—7ay)

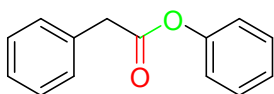

**Phenyl 2-phenylacetate (7aa)**<sup>[722-01-0]</sup>, this compound was prepared according to General Procedure C for 8 h, Yield: 81% (34.3 mg), colorless liquid;  $^1\text{H}$  NMR (400 MHz,  $\text{CDCl}_3$ )  $\delta$  7.41 – 7.28 (m, 7H), 7.20 (t,  $J = 7.4$  Hz, 1H), 7.05 (d,  $J = 7.8$  Hz, 2H), 3.86 (s, 2H).  $^{13}\text{C}$  NMR (100 MHz,  $\text{CDCl}_3$ )  $\delta$  170.0, 150.8, 133.5, 129.4, 129.3, 128.8, 127.4, 125.9, 121.5, 41.5. HRMS( $\text{ESI}^+$ ) calculated for  $\text{C}_{14}\text{H}_{12}\text{O}_2$   $[\text{M}+\text{H}^+]$  213.0916, found 213.0910.

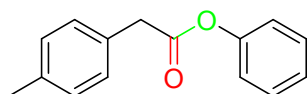

**Phenyl 2-(p-tolyl)acetate(7ab)**, this compound was prepared according to General Procedure C for 8 h, Yield: 88% (40.2 mg), colorless liquid;  $^1\text{H NMR}$  (400 MHz,  $\text{CDCl}_3$ )  $\delta$  7.34 (dd,  $J = 10.7, 5.1$  Hz, 2H), 7.26 (d,  $J = 7.9$  Hz, 2H), 7.23 – 7.14 (m, 3H), 7.08 – 7.01 (m, 2H), 3.80 (s, 2H), 2.34 (s, 3H).  $^{13}\text{C NMR}$  (100 MHz,  $\text{CDCl}_3$ )  $\delta$  170.2, 150.8, 137.0, 130.4, 129.4, 129.4, 129.2, 125.8, 121.5, 41.1, 21.1. FTIR (thin film):  $1746\text{ cm}^{-1}$  ( $\text{CH}_2\text{COOR}$ ); HRMS(ESI $^+$ ) calculated for  $\text{C}_{15}\text{H}_{14}\text{O}_2$  [ $\text{M}+\text{Na}^+$ ] 249.0891, found 249.0886.

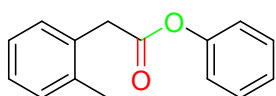

**Phenyl 2-(m-tolyl)acetate(7ac)**, this compound was prepared according to General Procedure C for 10 h, Yield: 70% (31.6 mg), colorless liquid;  $^1\text{H NMR}$  (400 MHz,  $\text{CDCl}_3$ )  $\delta$  7.38 – 7.27 (m, 3H), 7.25 – 7.17 (m, 4H), 7.05 (m, d,  $J = 8.8$  Hz, 2H), 3.87 (s, 2H), 2.40 (s, 3H).  $^{13}\text{C NMR}$  (100 MHz,  $\text{CDCl}_3$ )  $\delta$  169.9, 150.8, 136.9, 132.3, 130.5, 130.3, 129.4, 127.7, 126.3, 125.9, 121.5, 39.4 19.7. FTIR (thin film):  $1754\text{ cm}^{-1}$  ( $\text{CH}_2\text{COOR}$ ); HRMS(ESI $^+$ ) calculated for  $\text{C}_{15}\text{H}_{14}\text{O}_2$  [ $\text{M}+\text{Na}^+$ ] 249.0891, found 249.0895.

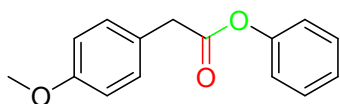

**Phenyl 2-(4-methoxyphenyl)acetate (7ad)**, this compound was prepared according to General Procedure C for 8 h, Yield: 85% (41.2 mg), colorless liquid;  $^1\text{H NMR}$  (400 MHz,  $\text{CDCl}_3$ )  $\delta$  7.35 (t,  $J = 7.6$  Hz, 2H), 7.30 (d,  $J = 8.7$  Hz, 2H), 7.22 (t,  $J = 7.6$  Hz, 1H), 7.05 (d,  $J = 8.8$  Hz, 2H), 6.90 (d,  $J = 6.8$  Hz, 2H), 3.80 (s, 3H), 3.79 (s, 2H).  $^{13}\text{C NMR}$  (100 MHz,  $\text{CDCl}_3$ )  $\delta$  170.3, 158.9, 150.8, 130.4, 129.4, 125.8, 125.5, 121.5, 114.2, 55.3, 40.6. FTIR (thin film):  $1754\text{ cm}^{-1}$  ( $\text{CH}_2\text{COOR}$ ); HRMS(ESI $^+$ ) calculated for  $\text{C}_{15}\text{H}_{14}\text{O}_3$  [ $\text{M}+\text{H}^+$ ] 243.1021, found 243.1016.

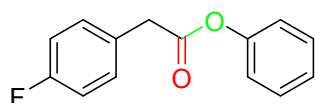

**Phenyl 2-(4-fluorophenyl)acetate (7ae)**, this compound was prepared according to General Procedure C for 8 h, Yield: 85% (39.1mg), colorless liquid;  $^1\text{H NMR}$  (400 MHz,  $\text{CDCl}_3$ )  $\delta$  7.39 – 7.32 (m, 4H), 7.22 (dd,  $J = 12.7, 5.3$  Hz, 1H), 7.08 – 7.02 (m, 4H), 3.82 (s, 2H).  $^{13}\text{C NMR}$  (100 MHz,  $\text{CDCl}_3$ )  $\delta$  169.9, 162.2 (d,  $J_{\text{C-F}} = 245.8$  Hz), 150.7, 131.0 (d,  $J_{\text{C-F}} = 8.1$  Hz), 129.5, 129.2 (d,  $J_{\text{C-F}} = 3.2$  Hz), 126.0, 121.4, 115.6 (d,  $J_{\text{C-F}} = 21.5$  Hz), 40.6. FTIR (thin film):  $1755\text{ cm}^{-1}$  ( $\text{CH}_2\text{COOR}$ ); HRMS(ESI $^+$ ) calculated for  $\text{C}_{14}\text{H}_{11}\text{FO}_2$  [ $\text{M}+\text{Na}^+$ ] 253.0641, found 253.0635.

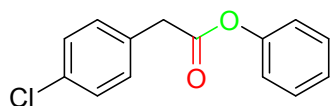

**Phenyl 2-(4-chlorophenyl)acetate (7af)**, this compound was prepared according to General Procedure C for 10 h, Yield: 80% (39.2mg), colorless liquid;  $^1\text{H}$  NMR (400 MHz,  $\text{CDCl}_3$ )  $\delta$  7.40 – 7.29 (m, 6H), 7.22 (dd,  $J = 12.4, 5.0$  Hz, 1H), 7.05 (d,  $J = 7.6$  Hz, 2H), 3.82 (s, 2H).  $^{13}\text{C}$  NMR (100 MHz,  $\text{CDCl}_3$ )  $\delta$  169.6, 150.6, 133.4, 131.9, 130.7, 129.5, 128.9, 126.0, 121.4, 40.7. FTIR (thin film):  $1762\text{ cm}^{-1}$  ( $\text{CH}_2\text{COOR}$ ); HRMS(ESI $^+$ ) calculated for  $\text{C}_{14}\text{H}_{11}\text{ClO}_2$  [ $\text{M} + \text{Na}^+$ ] 269.0345, found 269.0340.

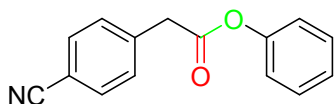

**Phenyl 2-(4-cyanophenyl)acetate (7ag)**, this compound was prepared according to General Procedure C for 12 h, Yield: 56% (26.5 mg), white solid; Mp: 64-66 °C,  $^1\text{H}$  NMR (400 MHz,  $\text{CDCl}_3$ )  $\delta$  7.66 (d,  $J = 8.3$  Hz, 2H), 7.50 (d,  $J = 8.1$  Hz, 2H), 7.38 (t,  $J = 8.0$  Hz, 2H), 7.24(m,  $J = 8.4$  Hz, 1H), 7.06 (m,  $J = 8.0$  Hz, 2H), 3.93 (s, 2H).  $^{13}\text{C}$  NMR (100 MHz,  $\text{CDCl}_3$ )  $\delta$  168.8, 150.5, 138.7, 132.5, 130.3, 129.5, 126.2, 121.3, 118.6, 111.5, 41.3. FTIR (KBr):  $1749\text{ cm}^{-1}$  ( $\text{CH}_2\text{COOR}$ ); HRMS(ESI $^+$ ) calculated for  $\text{C}_{15}\text{H}_{11}\text{FO}_2$  [ $\text{M} + \text{H}^+$ ] 260.0687, found 260.0682.

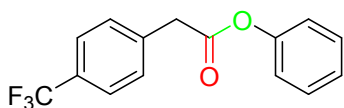

**Phenyl 2-(4-(trifluoromethyl)phenyl)acetate (7ah)**, this compound was prepared according to General Procedure C for 14 h, Yield: 48% (27.0 mg), colorless liquid;  $^1\text{H}$  NMR (400 MHz,  $\text{CDCl}_3$ )  $\delta$  7.63 (d,  $J = 8.1$  Hz, 2H), 7.51 (d,  $J = 8.1$  Hz, 2H), 7.37(t,  $J = 7.8$  Hz, 2H), 7.22 (t,  $J = 7.6$  Hz, 1H), 7.07 (t,  $J = 8.4$  Hz, 2H), 3.92 (s, 2H).  $^{13}\text{C}$  NMR (100 MHz,  $\text{CDCl}_3$ )  $\delta$  169.2, 150.8, 137.4, 129.8, 129.8(d,  $J_{\text{C-F}} = 128.0$  Hz), 129.5, 126.1, 125.7 (q,  $J_{\text{C-F}} = 3.8$  Hz), 124.1 (d,  $J_{\text{C-F}} = 272.0$  Hz), 121.4, 41.1. FTIR (thin film):  $1756\text{ cm}^{-1}$  ( $\text{CH}_2\text{COOR}$ ); HRMS(ESI $^+$ ) calculated for  $\text{C}_{15}\text{H}_{11}\text{F}_3\text{O}_2$  [ $\text{M} + \text{Na}^+$ ] 303.0609, found 303.0603.

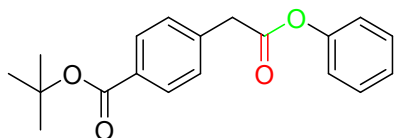

**Tert-butyl 4-(2-oxo-2-phenoxyethyl)benzoate (7ai)**, this compound was prepared according to General Procedure C for 12 h, Yield: 67% (42.0 mg), colorless liquid;  $^1\text{H}$  NMR (400 MHz,  $\text{CDCl}_3$ )  $\delta$  7.99 (d,  $J = 8.2$  Hz, 2H), 7.44 (d,  $J = 8.2$  Hz, 2H), 7.36 (t,  $J = 7.6$  Hz, 2H), 7.21 (t,  $J = 7.4$  Hz, 1H), 7.04 (d, 7.6 Hz, 2H), 3.90 (s, 2H), 1.60 (s, 9H).  $^{13}\text{C}$  NMR (100 MHz,  $\text{CDCl}_3$ )  $\delta$  169.4, 165.5, 150.7, 138.0, 131.2, 129.9, 129.5, 129.2, 126.0, 121.4, 81.1, 41.4, 28.2. FTIR (thin film):  $1757\text{ cm}^{-1}$  ( $\text{CH}_2\text{COOR}$ ); HRMS(ESI $^+$ ) calculated for  $\text{C}_{19}\text{H}_{20}\text{O}_4$  [ $\text{M} + \text{Na}^+$ ] 313.1440, found 313.1445.

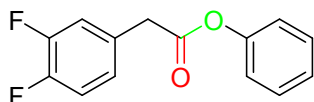



**Phenyl 2-(3,4-difluorophenyl)acetate (7aj)**, this compound was prepared according to General Procedure C for 10 h, Yield: 83% (41.2 mg), colorless liquid;  $^1\text{H NMR}$  (400 MHz,  $\text{CDCl}_3$ )  $\delta$  7.37 (t,  $J = 8.0$  Hz, 2H), 7.25 – 7.19 (m, 2H), 7.18 – 7.02 (m, 4H), 3.81 (s, 2H).  $^{13}\text{C NMR}$  (100 MHz,  $\text{CDCl}_3$ )  $\delta$  169.3, 151.3 (dd,  $J = 47.0, 12.7$  Hz), 150.6, 148.8 (dd,  $J = 46.5, 12.5$  Hz), 130.2 (q,  $J_{\text{C-F}} = 40.0$  Hz), 129.5, 126.1, 125.5 (dd,  $J_{\text{C-F}} = 39.6, 9.6$  Hz), 121.4, 118.5 (d,  $J = 17.7$  Hz), 117.5 (d,  $J = 17.3$  Hz), 40.4. FTIR (thin film):  $1761\text{ cm}^{-1}$  ( $\text{CH}_2\text{COOR}$ ); HRMS( $\text{ESI}^+$ ) calculated for  $\text{C}_{14}\text{H}_{10}\text{F}_2\text{O}_2$  [ $\text{M}+\text{Na}^+$ ] 271.0547, found 271.0548.

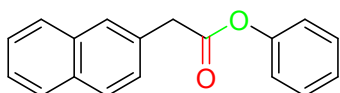

**Phenyl 2-(naphthalen-2-yl)acetate (7ak)**, this compound was prepared according to General Procedure C for 12 h, Yield: 32% (16.9 mg), white solid; Mp: 109-110 °C,  $^1\text{H NMR}$  (400 MHz,  $\text{CDCl}_3$ )  $\delta$  7.84 (t,  $J = 8.8$  Hz, 4H), 7.50 (m,  $J = 9.2, 8.0, 2.7$  Hz, 3H), 7.34 (t,  $J = 7.9$  Hz, 2H), 7.20 (t,  $J = 7.4$  Hz, 1H), 7.06 (d,  $J = 8.8$  Hz, 2H), 4.02 (s, 2H).  $^{13}\text{C NMR}$  (100 MHz,  $\text{CDCl}_3$ )  $\delta$  170.0, 150.8, 133.5, 132.6, 131.0, 129.4, 128.5, 128.2, 127.8, 127.7, 127.3, 126.3, 126.0, 125.9, 121.5, 41.7. FTIR (KBr):  $1755\text{ cm}^{-1}$  ( $\text{CH}_2\text{COOR}$ ); HRMS( $\text{ESI}^+$ ) calculated for  $\text{C}_{18}\text{H}_{14}\text{O}_2$  [ $\text{M}+\text{Na}^+$ ] 285.0891, found 285.0886.

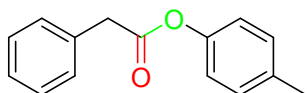

**P-tolyl 2-phenylacetate (7al)**, this compound was prepared according to General Procedure C for 8 h, Yield: 83% (37.5 mg), colorless liquid;  $^1\text{H NMR}$  (400 MHz,  $\text{CDCl}_3$ )  $\delta$  7.42 – 7.26 (m, 5H), 7.13 (d,  $J = 8.3$  Hz, 2H), 6.93 (d,  $J = 8.3$  Hz, 2H), 3.83 (s, 2H), 2.31 (s, 2H).  $^{13}\text{C NMR}$  (100 MHz,  $\text{CDCl}_3$ )  $\delta$  170.2, 148.6, 135.5, 133.6, 129.9, 129.3, 128.7, 127.3, 121.1, 41.4, 20.9. FTIR (thin film):  $1740\text{ cm}^{-1}$  ( $\text{CH}_2\text{COOR}$ ); HRMS( $\text{ESI}^+$ ) calculated for  $\text{C}_{15}\text{H}_{14}\text{O}_2$  [ $\text{M}+\text{Na}^+$ ] 249.0891, found 249.0893.

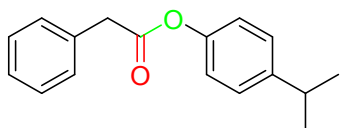

**4-isopropylphenyl 2-phenylacetate (7am)**, this compound was prepared according to General Procedure C for 10 h, Yield: 89% (45.2 mg), colorless liquid;  $^1\text{H NMR}$  (400 MHz,  $\text{CDCl}_3$ )  $\delta$  7.43 – 7.25 (m, 5H), 7.19 (d,  $J = 8.5$  Hz, 2H), 6.96 (d,  $J = 8.5$  Hz, 2H), 3.83 (s, 2H), 2.94 – 2.82 (m, 1H), 1.22 (d,  $J = 6.9$  Hz, 6H).  $^{13}\text{C NMR}$  (100 MHz,  $\text{CDCl}_3$ )  $\delta$  170.2, 148.7, 146.4, 133.6, 129.3, 128.7, 127.3, 127.3, 121.1, 41.5, 33.6, 24.0. FTIR (thin film):  $1762\text{ cm}^{-1}$  ( $\text{CH}_2\text{COOR}$ ); HRMS( $\text{ESI}^+$ ) calculated for  $\text{C}_{17}\text{H}_{18}\text{O}_2$  [ $\text{M}+\text{Na}^+$ ] 277.1204, found 277.1199.

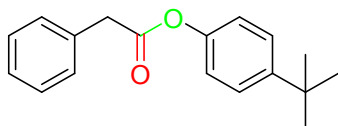

**4-(tert-butyl)phenyl 2-phenylacetate (7an)**, this compound was prepared according to General Procedure C for 8 h, Yield: 84% (44.9 mg), colorless liquid;  $^1\text{H}$  NMR (400 MHz,  $\text{CDCl}_3$ )  $\delta$  7.40 – 7.32 (m, 6H), 7.31 – 7.26 (m, 1H), 7.00 – 6.95 (m, 2H), 3.84 (s, 2H), 1.29 (s, 9H).  $^{13}\text{C}$  NMR (100 MHz,  $\text{CDCl}_3$ )  $\delta$  170.2, 148.7, 148.5, 133.7, 129.3, 128.7, 127.3, 126.3, 120.8, 41.5, 34.5, 31.4. FTIR (thin film):  $1759\text{ cm}^{-1}$  ( $\text{CH}_2\text{COOR}$ ); HRMS(ESI $^+$ ) calculated for  $\text{C}_{18}\text{H}_{20}\text{O}_2$  [ $\text{M}+\text{Na}^+$ ] 291.1361, found 291.1356.

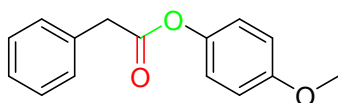

**4-methoxyphenyl 2-phenylacetate (7ao)**, this compound was prepared according to General Procedure C for 10 h, Yield: 87% (42.1 mg), colorless liquid;  $^1\text{H}$  NMR (400 MHz,  $\text{CDCl}_3$ )  $\delta$  7.40 – 7.34 (m, 4H), 7.33 – 7.27 (m, 1H), 6.97 (d,  $J = 9.2$  Hz, 2H), 6.85 (d,  $J = 9.2$  Hz, 2H), 3.83 (s, 2H), 3.77 (s, 3H).  $^{13}\text{C}$  NMR (100 MHz,  $\text{CDCl}_3$ )  $\delta$  170.4, 157.3, 144.3, 133.6, 129.3, 128.7, 127.3, 122.2, 114.4, 55.6, 41.4. FTIR (thin film):  $1739\text{ cm}^{-1}$  ( $\text{CH}_2\text{COOR}$ ); HRMS(ESI $^+$ ) calculated for  $\text{C}_{15}\text{H}_{14}\text{O}_3$  [ $\text{M}+\text{Na}^+$ ] 265.0841, found 265.0835.

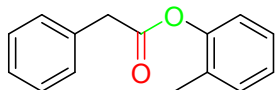

**O-tolyl 2-phenylacetate (7ap)**, this compound was prepared according to General Procedure C for 8 h, Yield: 76% (34.3 mg), colorless liquid;  $^1\text{H}$  NMR (400 MHz,  $\text{CDCl}_3$ )  $\delta$  7.42 – 7.33 (m, 4H), 7.29 (t,  $J = 7.2$  Hz, 1H), 7.17 (t,  $J = 7.2$  Hz, 2H), 7.13 – 7.07 (m, 1H), 6.97 (d,  $J = 7.8$  Hz, 1H), 3.86 (s, 2H), 2.02 (s, 3H).  $^{13}\text{C}$  NMR (100 MHz,  $\text{CDCl}_3$ )  $\delta$  169.7, 149.4, 133.6, 131.2, 130.2, 129.4, 128.8, 127.4, 126.9, 126.1, 121.8, 41.5, 16.0. FTIR (thin film):  $1754\text{ cm}^{-1}$  ( $\text{CH}_2\text{COOR}$ ); HRMS(ESI $^+$ ) calculated for  $\text{C}_{15}\text{H}_{14}\text{O}_2$  [ $\text{M}+\text{Na}^+$ ] 249.0891, found 249.0886

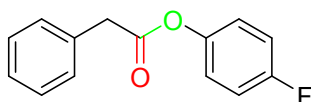

**4-fluorophenyl 2-phenylacetate (7aq)**, this compound was prepared according to General Procedure C for 12 h, Yield: 80% (36.7 mg), colorless liquid;  $^1\text{H}$  NMR (400 MHz,  $\text{CDCl}_3$ )  $\delta$  7.41 – 7.28 (m, 5H), 7.06 – 6.99 (m, 4H), 3.85 (s, 2H).  $^{13}\text{C}$  NMR (100 MHz,  $\text{CDCl}_3$ )  $\delta$  170.1, 160.3 (d,  $J_{\text{C-F}} = 244.2$  Hz), 146.6 (d,  $J_{\text{C-F}} = 2.7$  Hz), 133.4, 129.3, 128.8, 127.5, 122.9 (d,  $J_{\text{C-F}} = 8.5$  Hz), 116.0 (d,  $J_{\text{C-F}} = 23.5$  Hz), 41.3. FTIR (thin film):  $1759\text{ cm}^{-1}$  ( $\text{CH}_2\text{COOR}$ ); HRMS(ESI $^+$ ) calculated for  $\text{C}_{14}\text{H}_{11}\text{FO}_2$  [ $\text{M}+\text{Na}^+$ ] 253.0641, found 253.0635.

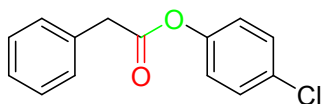

**4-chlorophenyl 2-phenylacetate (7ar)**, this compound was prepared according to General Procedure C for 8 h, Yield: 89% (43.7 mg), colorless liquid;  $^1\text{H NMR}$  (400 MHz,  $\text{CDCl}_3$ )  $\delta$  7.36 (d,  $J = 4.4$  Hz, 4H), 7.33 – 7.27 (m, 3H), 7.02 – 6.97 (m, 2H), 3.84 (s, 2H).  $^{13}\text{C NMR}$  (100 MHz,  $\text{CDCl}_3$ )  $\delta$  169.8, 149.3, 133.3, 131.3, 129.5, 129.3, 128.8, 127.5, 122.9, 41.4. FTIR (thin film):  $1747\text{ cm}^{-1}$  ( $\text{CH}_2\text{COOR}$ ); HRMS(ESI $^+$ ) calculated for  $\text{C}_{14}\text{H}_{11}\text{ClO}_2$  [ $\text{M}+\text{Na}^+$ ] 269.0345, found 269.0340.

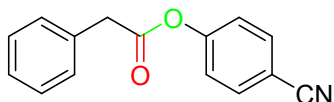

**4-cyanophenyl 2-phenylacetate (7as)**, this compound was prepared according to General Procedure C for 10 h, Yield: 92% (43.7 mg), colorless liquid;  $^1\text{H NMR}$  (400 MHz,  $\text{CDCl}_3$ )  $\delta$  7.66 (d,  $J = 8.8$  Hz, 2H), 7.42 – 7.28 (m, 5H), 7.20 (d,  $J = 8.7$  Hz, 2H), 3.88 (s, 2H).  $^{13}\text{C NMR}$  (100 MHz,  $\text{CDCl}_3$ )  $\delta$  169.2, 154.0, 133.7, 132.8, 129.3, 128.9, 127.7, 122.7, 118.2, 109.8, 41.3. FTIR(thin film):  $1766\text{ cm}^{-1}$  ( $\text{CH}_2\text{COOR}$ ); HRMS(ESI $^+$ ) calculated for  $\text{C}_{15}\text{H}_{11}\text{NO}_2$  [ $\text{M}+\text{Na}^+$ ] 260.0687, found 260.0682.

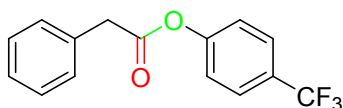

**4-(trifluoromethyl)phenyl 2-phenylacetate (7at)**, this compound was prepared according to General Procedure C for 8 h, Yield: 91% (50.9 mg), yellow liquid;  $^1\text{H NMR}$  (400 MHz,  $\text{CDCl}_3$ )  $\delta$  7.62 (d,  $J = 8.8$  Hz, 2H), 7.39 – 7.30 (m, 5H), 7.19 (d,  $J = 8.4$  Hz, 2H), 3.87 (s, 2H).  $^{13}\text{C NMR}$  (100 MHz,  $\text{CDCl}_3$ )  $\delta$  169.5, 153.3, 133.1, 129.4, 128.9, 128.2 (q,  $J_{\text{C-F}} = 32.9$  Hz), 127.6, 126.8 (q,  $J_{\text{C-F}} = 3.7$  Hz), 123.9 (d,  $J_{\text{C-F}} = 271.9$  Hz), 122.0, 41.4. FTIR(thin film):  $1750\text{ cm}^{-1}$  ( $\text{CH}_2\text{COOR}$ ); HRMS(ESI $^+$ ) calculated for  $\text{C}_{15}\text{H}_{11}\text{F}_3\text{O}_2$  [ $\text{M}+\text{Na}^+$ ] 303.0609, found 303.0603.

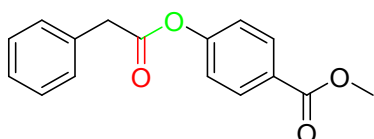

**Methyl 4-(2-phenylacetoxy)benzoate (7au)**, this compound was prepared according to General Procedure C for 10 h, Yield: 58% (31.3 mg), white solid; Mp: 88-89 °C.  $^1\text{H NMR}$  (400 MHz,  $\text{CDCl}_3$ )  $\delta$  8.04 (d,  $J = 8.8$  Hz, 2H), 7.38 (d,  $J = 4.3$  Hz, 3H), 7.32 (t,  $J = 4.2$  Hz, 1H), 7.14 (d,  $J = 8.8$  Hz, 2H), 3.90 (s, 3H), 3.87 (s, 2H).  $^{13}\text{C NMR}$  (100 MHz,  $\text{CDCl}_3$ )  $\delta$  169.5, 166.3, 154.4, 133.1, 131.1, 129.3, 128.8, 127.8, 127.5, 121.5, 52.2, 41.4. FTIR(KBr):  $1745\text{ cm}^{-1}$  ( $\text{CH}_2\text{COOR}$ ); HRMS(ESI $^+$ ) calculated for  $\text{C}_{16}\text{H}_{14}\text{O}_4$  [ $\text{M}+\text{H}^+$ ] 271.0970, found 271.0965.

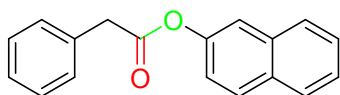

**Naphthalen-2-yl 2-phenylacetate (7av)**, this compound was prepared according to General Procedure C for 10 h, Yield: 58% (30.2 mg), white solid; Mp: 82-83 °C,  $^1\text{H}$  NMR (400 MHz,  $\text{CDCl}_3$ )  $\delta$  7.82 (d,  $J = 8.9$  Hz, 2H), 7.79 – 7.75 (m, 1H), 7.53 (d,  $J = 2.1$  Hz, 1H), 7.50 – 7.36 (m, 6H), 7.35 – 7.29 (m, 1H), 7.19 (dd,  $J = 8.9, 2.3$  Hz, 1H), 3.91 (s, 2H).  $^{13}\text{C}$  NMR (100 MHz,  $\text{CDCl}_3$ )  $\delta$  170.2, 148.5, 133.8, 133.5, 131.5, 129.4, 129.4, 128.9, 127.8, 127.7, 127.5, 126.6, 125.8, 121.0, 118.5, 41.5. FTIR(KBr):  $1760\text{ cm}^{-1}$  ( $\text{CH}_2\text{COOR}$ ); HRMS(ESI $^+$ ) calculated for  $\text{C}_{18}\text{H}_{14}\text{O}_2$  [ $\text{M}+\text{Na}^+$ ] 285.0891, found 285.0886.

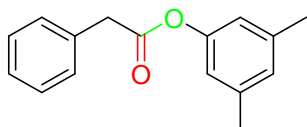

**3,5-dimethylphenyl 2-phenylacetate (7aw)**, this compound was prepared according to General Procedure C for 10 h, Yield: 71% (34.1 mg), colorless liquid;  $^1\text{H}$  NMR (400 MHz,  $\text{CDCl}_3$ )  $\delta$  7.42 – 7.33 (m, 4H), 7.32 – 7.26 (m, 1H), 6.84 (s, 1H), 6.66 (s, 2H), 3.83 (s, 2H), 2.28 (s, 6H).  $^{13}\text{C}$  NMR (100 MHz,  $\text{CDCl}_3$ )  $\delta$  170.2, 150.7, 139.3, 133.6, 129.3, 128.7, 127.6, 127.3, 119.0, 41.5, 21.2. FTIR(thin film):  $1758\text{ cm}^{-1}$  ( $\text{CH}_2\text{COOR}$ ); HRMS(ESI $^+$ ) calculated for  $\text{C}_{16}\text{H}_{16}\text{O}_2$  [ $\text{M}+\text{Na}^+$ ] 263.1048, found 263.1043.

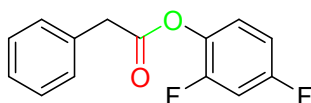

**2,4-difluorophenyl 2-phenylacetate (7ax)**, this compound was prepared according to General Procedure C for 10 h, Yield: 73% (36.2 mg), colorless liquid;  $^1\text{H}$  NMR (400 MHz,  $\text{CDCl}_3$ )  $\delta$  7.39 – 7.27 (m, 5H), 7.08 – 7.00 (m, 1H), 6.93 – 6.78 (m, 2H), 3.89 (s, 2H).  $^{13}\text{C}$  NMR (100 MHz,  $\text{CDCl}_3$ )  $\delta$  169.1, 161.5 (dd,  $J_{\text{C-F}} = 247.4, 10.5$  Hz), 155.4 (dd,  $J_{\text{C-F}} = 252.1, 12.5$  Hz), 134.6 (dd,  $J_{\text{C-F}} = 13.0, 4.0$  Hz), 133.0, 129.3, 128.8, 127.5, 124.2 (dd,  $J_{\text{C-F}} = 9.9, 2.0$  Hz), 111.2 (dd,  $J_{\text{C-F}} = 23.1, 3.9$  Hz), 105.1 (dd,  $J_{\text{C-F}} = 26.9, 22.4$  Hz), 40.8. FTIR(thin film):  $1752\text{ cm}^{-1}$  ( $\text{CH}_2\text{COOR}$ ); HRMS(ESI $^+$ ) calculated for  $\text{C}_{14}\text{H}_{10}\text{F}_2\text{O}_2$  [ $\text{M}+\text{Na}^+$ ] 271.0547, found 271.0548.

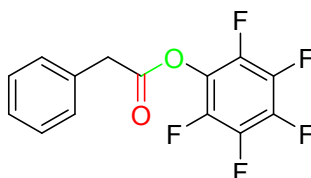

**Perfluorophenyl 2-phenylacetate (7ay)**, this compound was prepared according to General Procedure C for 12 h, Yield: 48% (28.7 mg), white solid;  $^1\text{H}$  NMR (400 MHz,  $\text{CDCl}_3$ )  $\delta$  7.46 – 7.29 (m, 5H), 3.97 (s, 2H).  $^{13}\text{C}$  NMR (100 MHz,  $\text{CDCl}_3$ )  $\delta$  167.5, 132.1, 129.3, 129.0, 127.9, 40.2. FTIR(thin film):  $1748\text{ cm}^{-1}$  ( $\text{CH}_2\text{COOR}$ ); HRMS(ESI $^+$ ) calculated for  $\text{C}_{14}\text{H}_8\text{F}_5\text{NO}$  [ $\text{M} + \text{Na}^+$ ] 324.0424, found 324.0430.

## Part 8: References:

- (1) Icke, R. N.; Wisegarver, B. B.; Alles, G. A. *Org. Synth.* **1955**, *Coll. Vol. 3*, 723.
- (2) The reductive aminations were carried out according to literature procedure, except that Me<sub>2</sub>NH was formed in situ from Me<sub>2</sub>N·HCl and Et<sub>3</sub>N. See: Bhattacharyya, S. *Synth. Commun.* **2000**, *30*, 2001.
- (3) Maity, P.; Shacklady-McAtee, D. M.; Yap, G. P. A.; Sirianni, E. R.; Watson, M. P. *J. Am. Chem. Soc.* **2013**, *135*, 280.
- (4) Gu, L.; Lim, J.; Cheong, J. L.; Lee, S. S. *Chem. Commun.* **2014**, *50*, 7017.
- (5) Huang, H.; Tang, L.; Xi, Y.; He, G.; Zhu, H. *Tetrahedron Lett* **2016**, *57*, 1873.

- (6) Mamillapalli, N. C.; Sekar, G. *Adv. Synth. Catal* **2015**, *357*, 3273.
- (7) Liu, H.; Laurency, G.; Yan, N.; Dyson, P. J. *Chem. Commun.* **2014**, *50*, 341.
- (8) Xie, P.; Xia, C.; Huang, H. *Org Lett* **2013**, *15*, 3370-3.

## Part 9. $^1\text{H}$ NMR and $^{13}\text{C}$ NMR Spectra

### $^1\text{H}$ NMR Spectra of 3aa

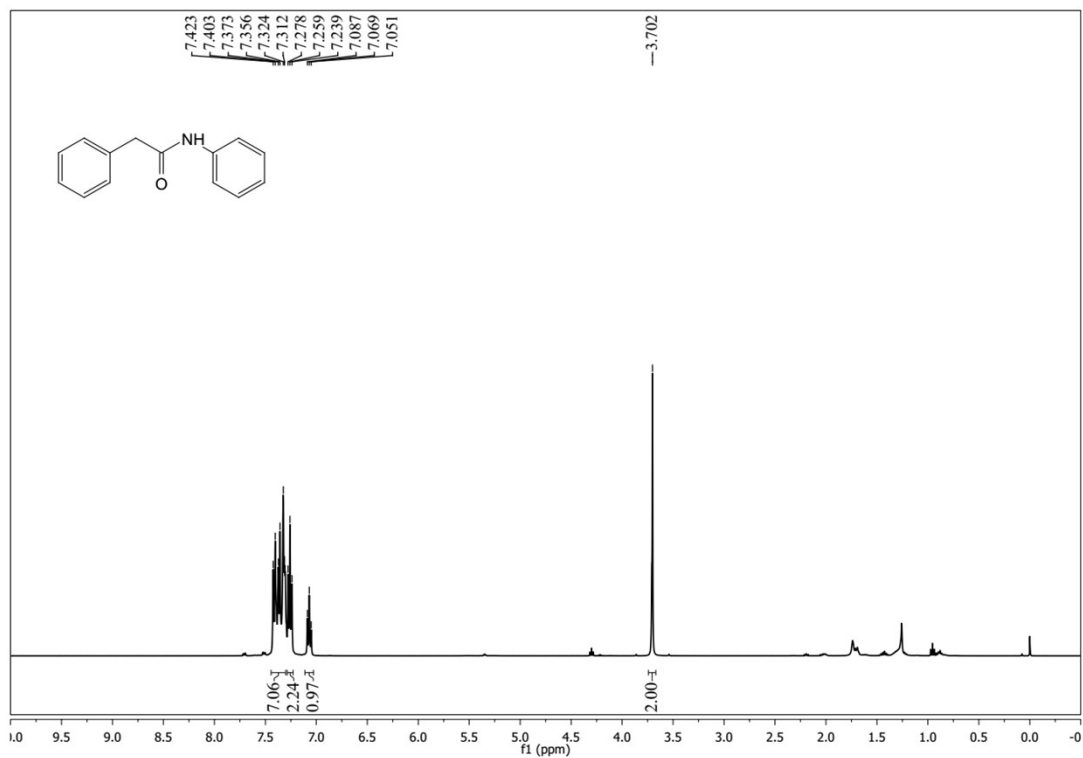

### <sup>13</sup>C NMR Spectra of 3aa

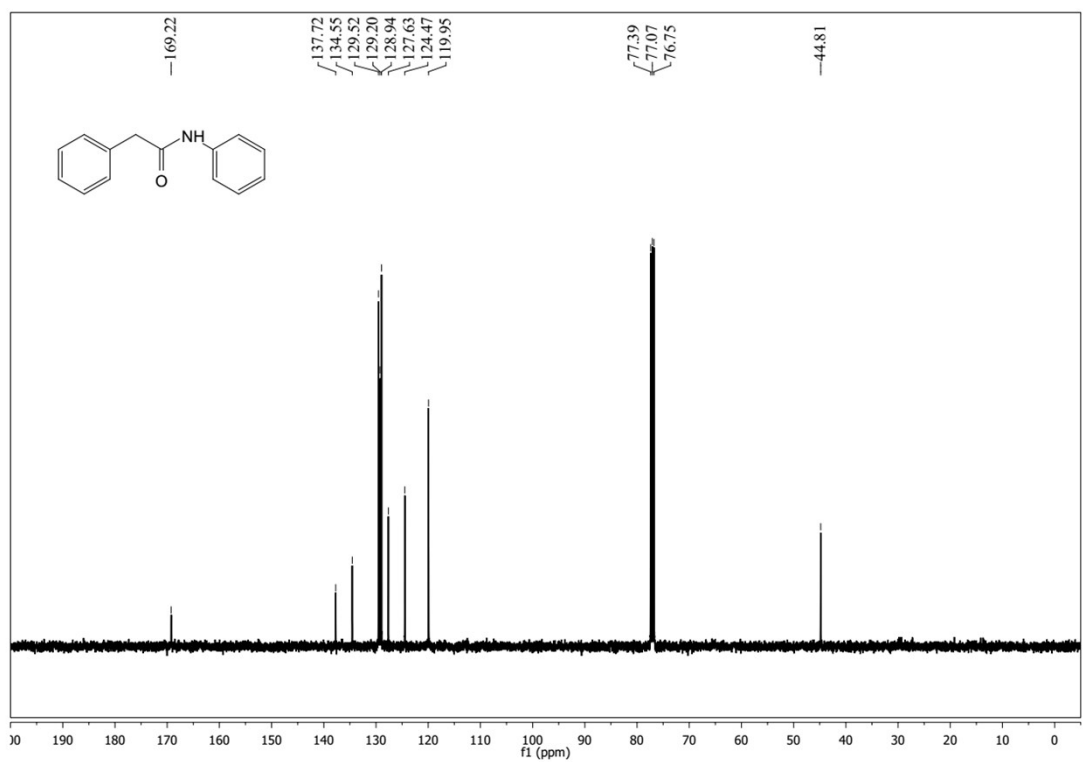

### <sup>1</sup>H NMR Spectra of 3ab

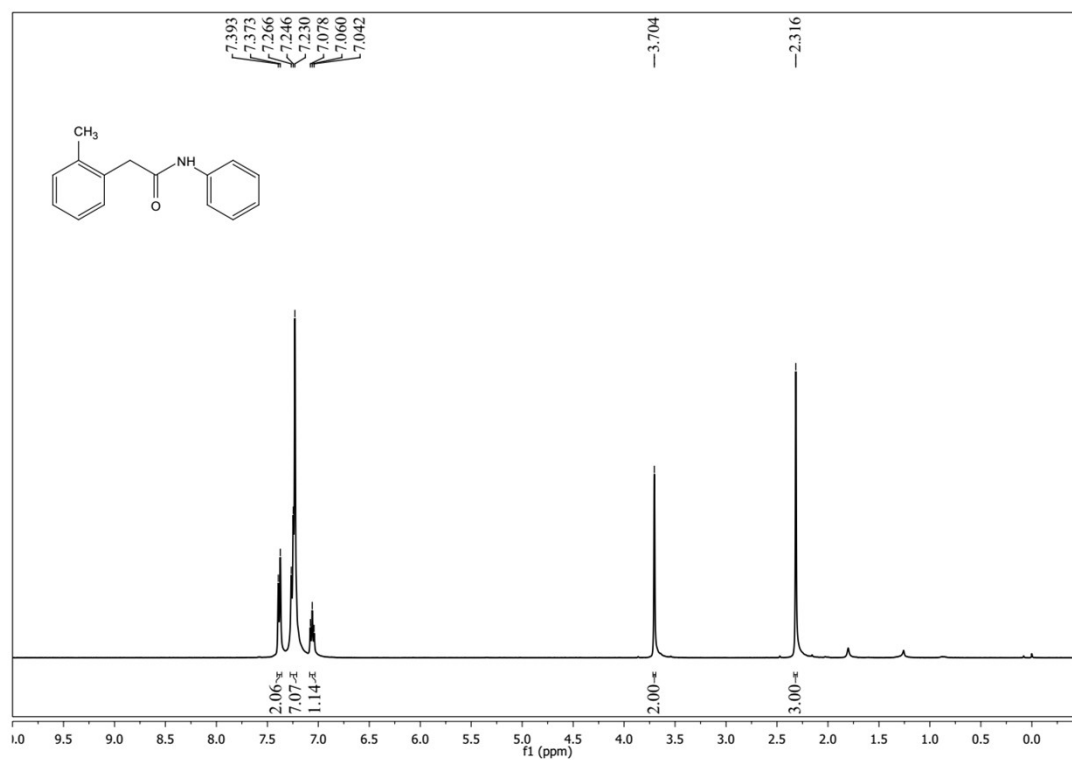

### <sup>13</sup>C NMR Spectra of 3ab

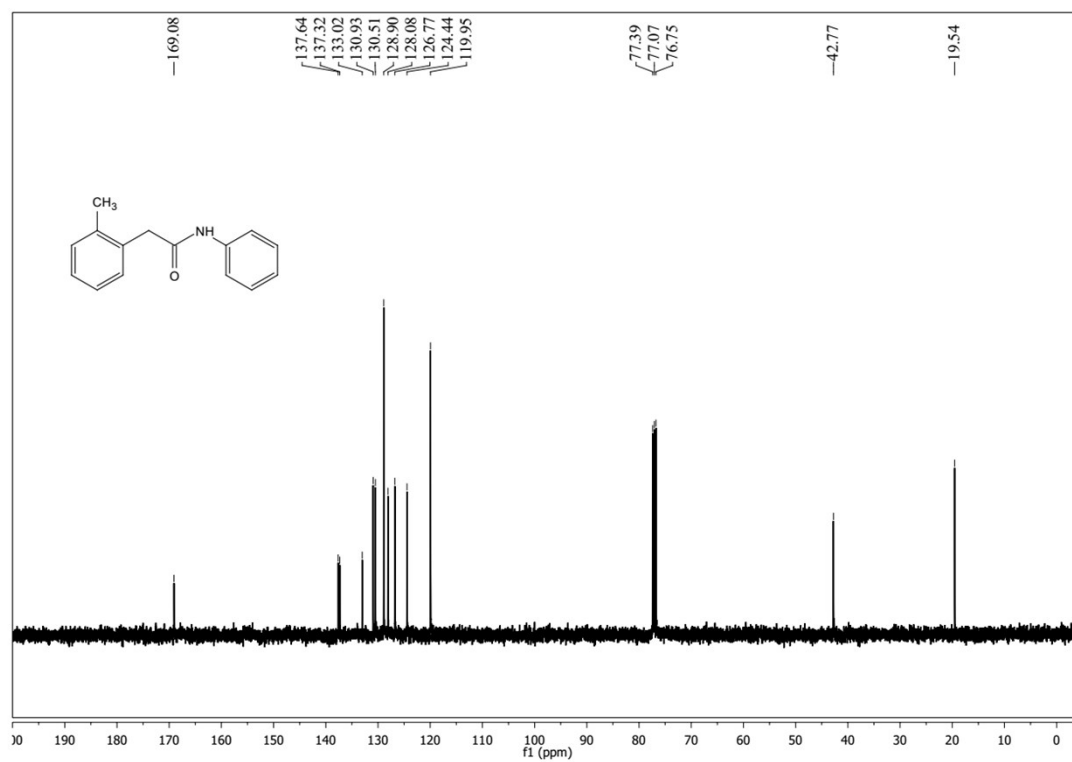

### <sup>1</sup>H NMR Spectra of 3ac



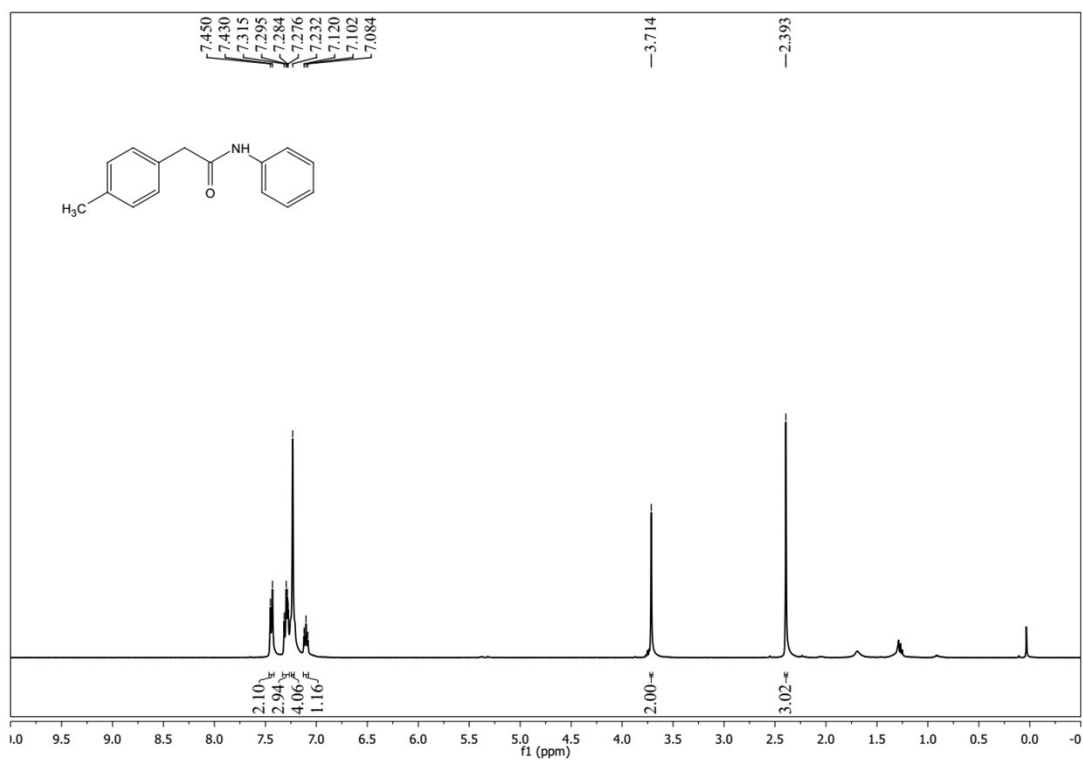

### <sup>13</sup>C NMR Spectra of 3ac

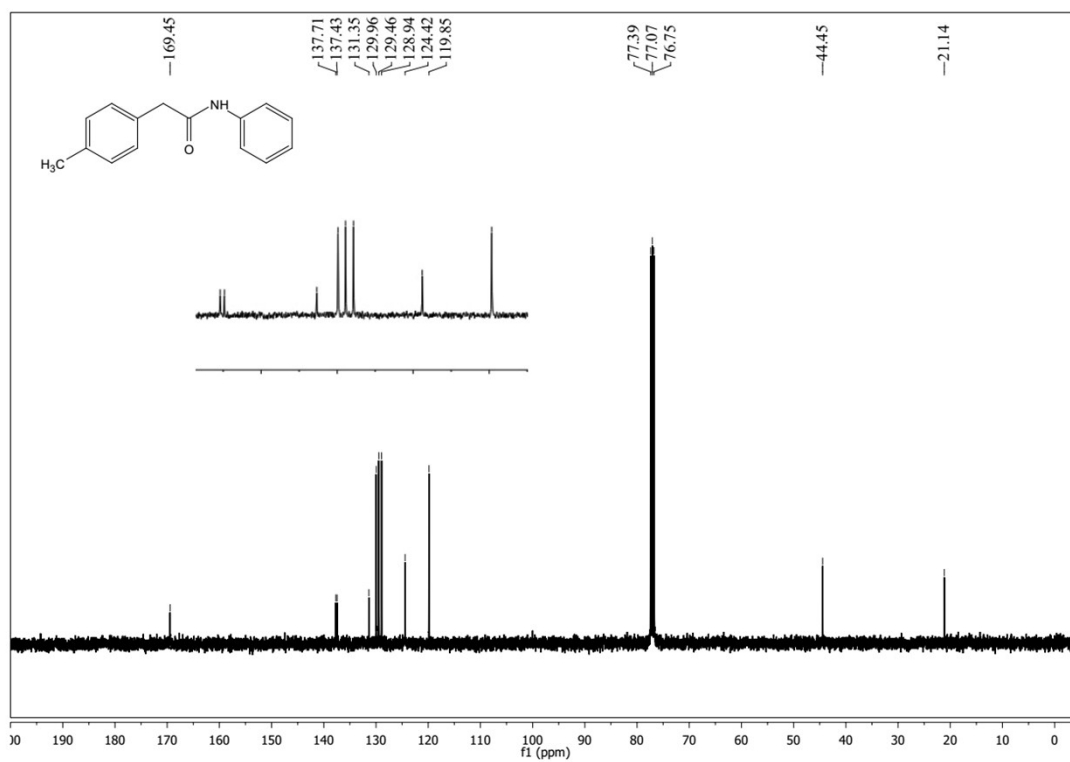

### <sup>1</sup>H NMR Spectra of 3ad

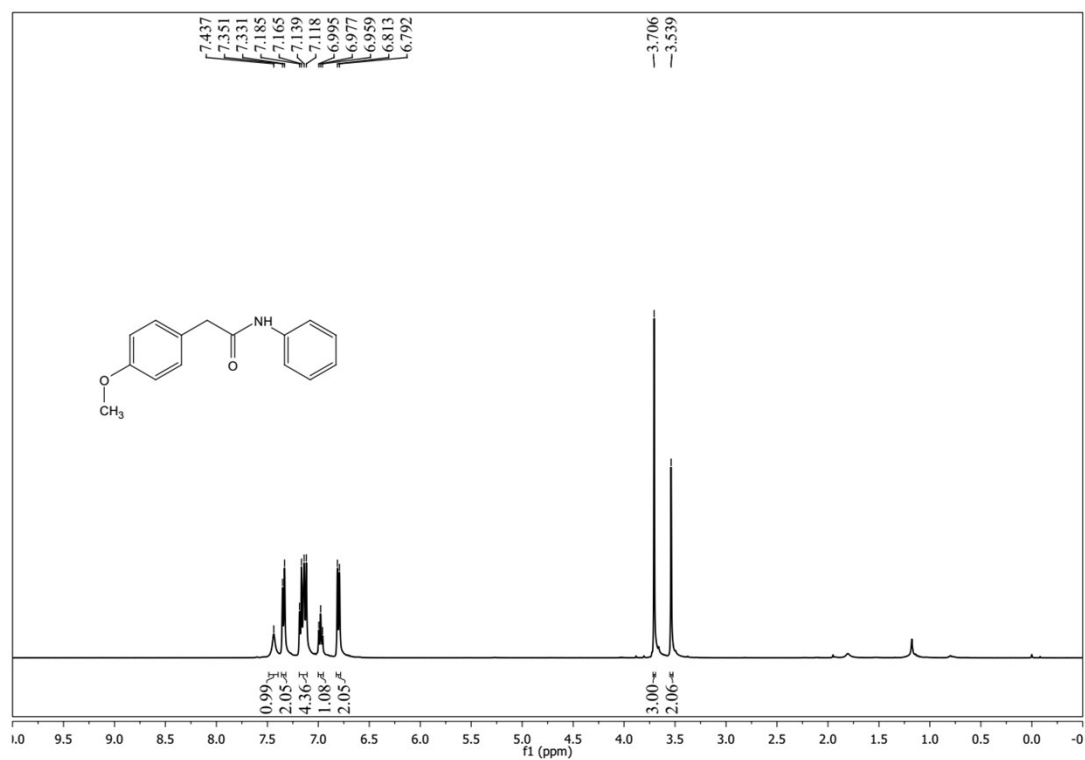

### <sup>13</sup>C NMR Spectra of 3ad

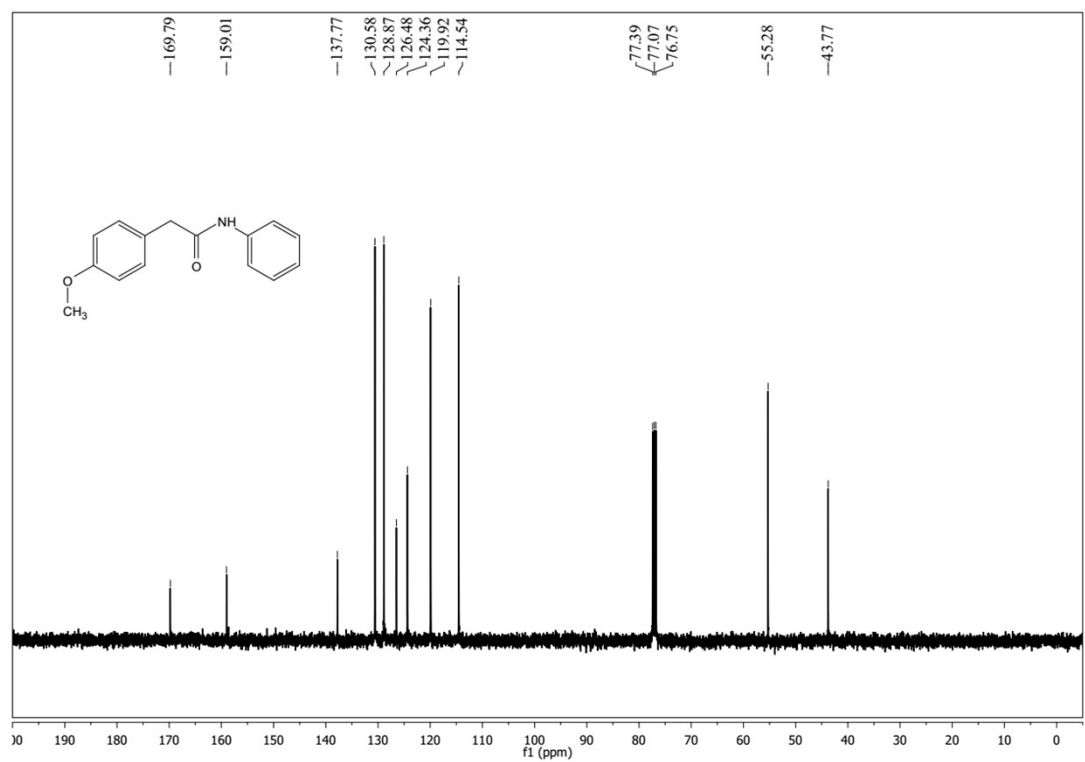

### <sup>1</sup>H NMR Spectra of 3ae

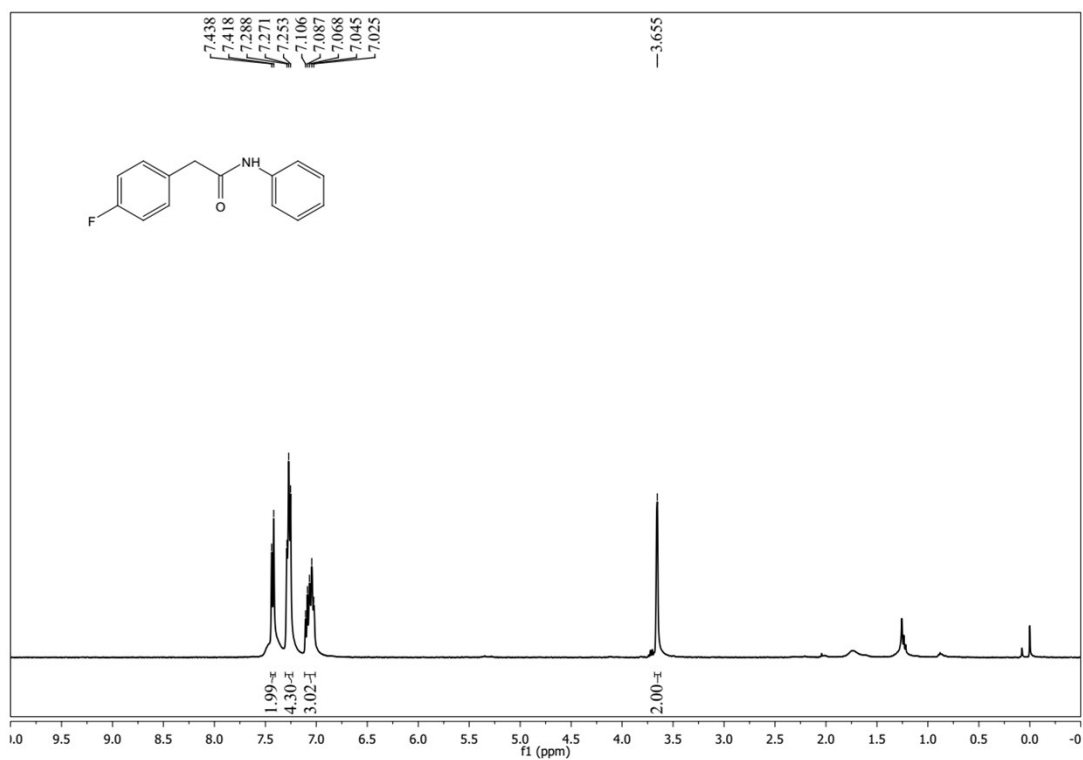

### <sup>13</sup>C NMR Spectra of 3ae

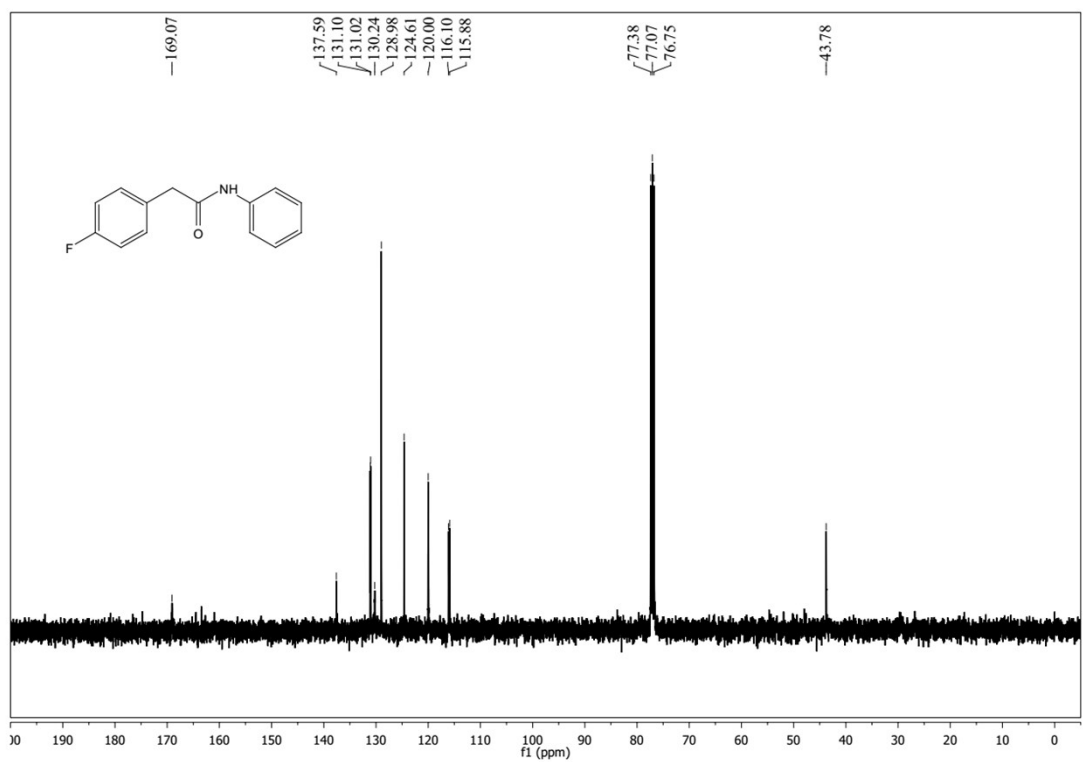

### <sup>1</sup>H NMR Spectra of 3af

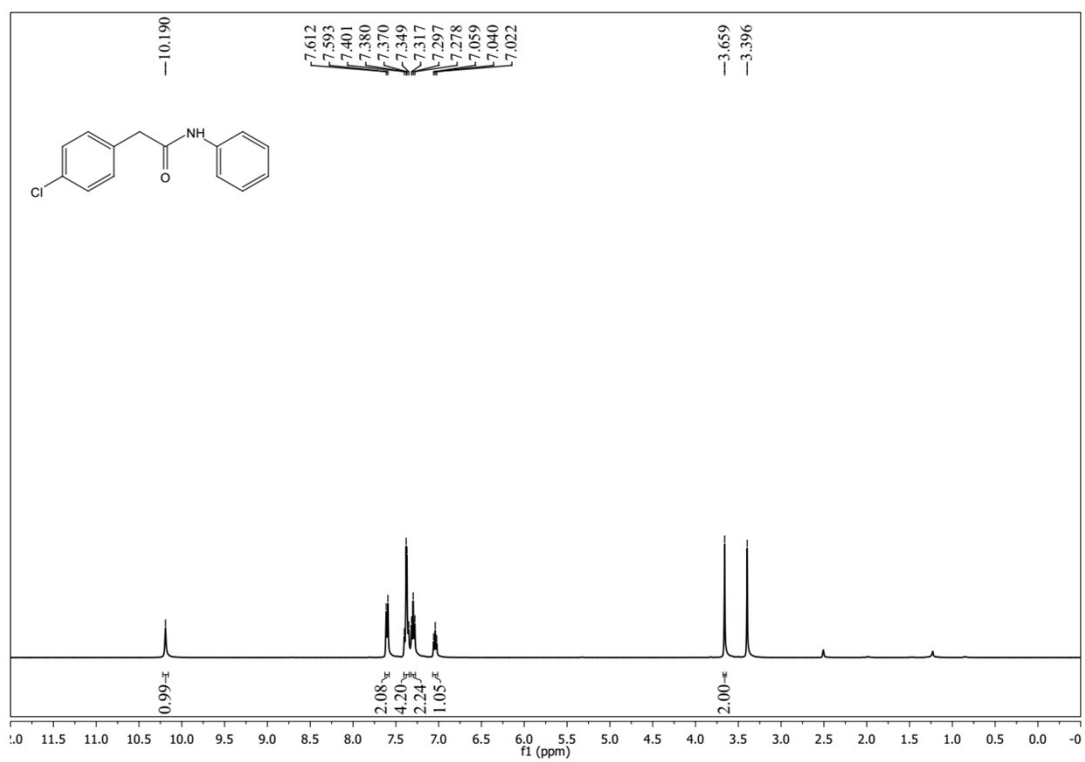

### <sup>13</sup>C NMR Spectra of 3af

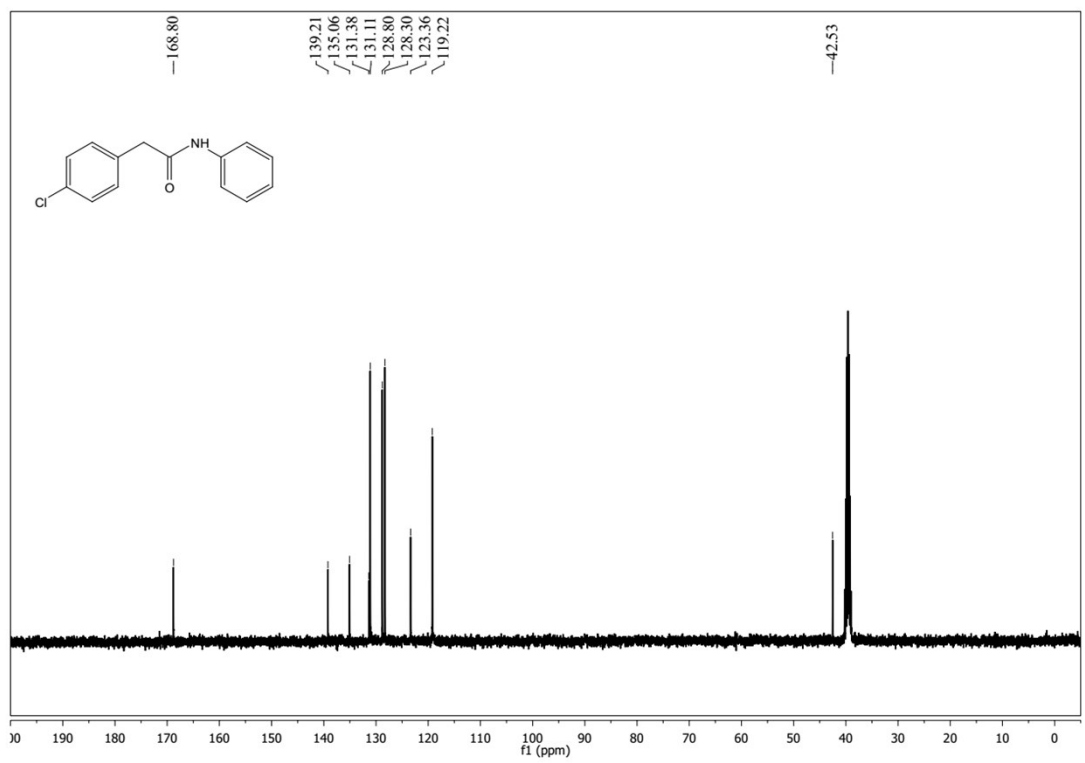

### <sup>1</sup>H NMR Spectra of 3ag

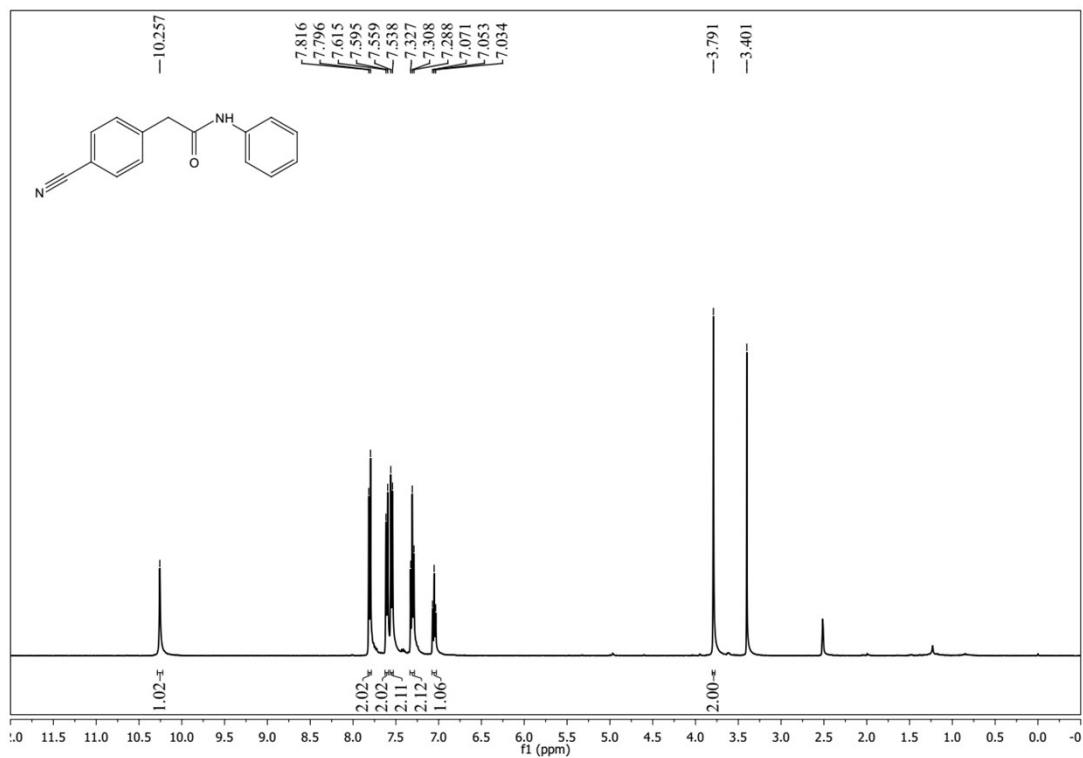

**<sup>13</sup>C NMR Spectra of 3ag**

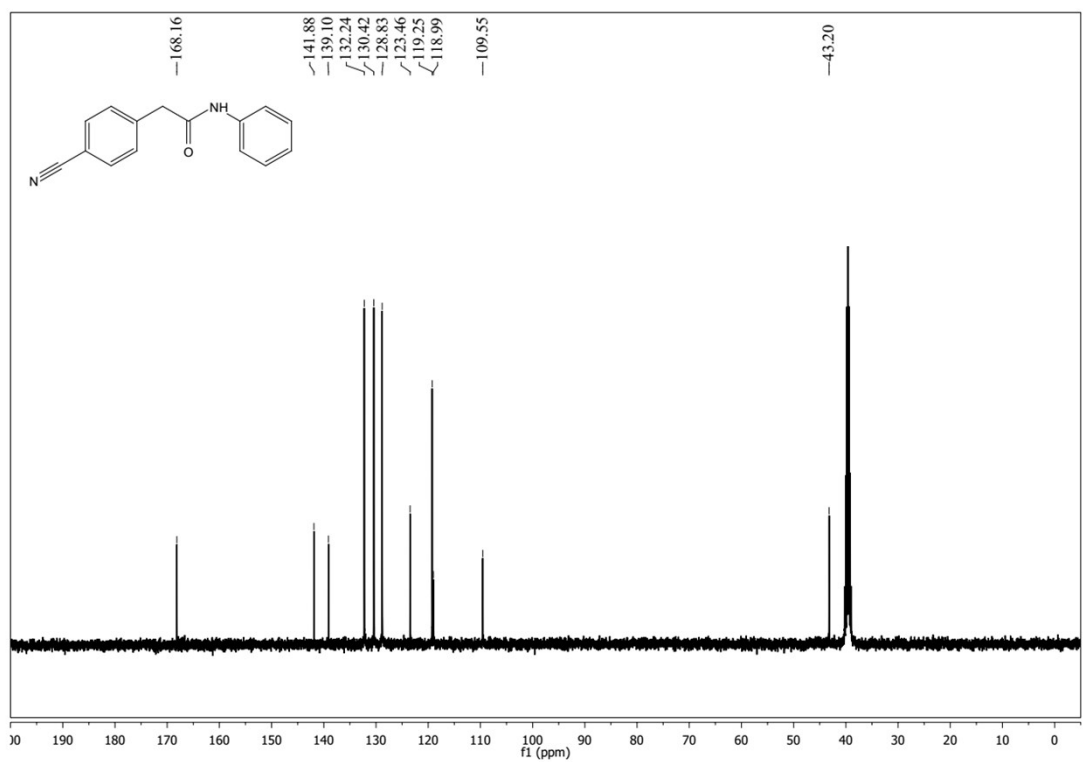

**<sup>1</sup>H NMR Spectra of 3ah**

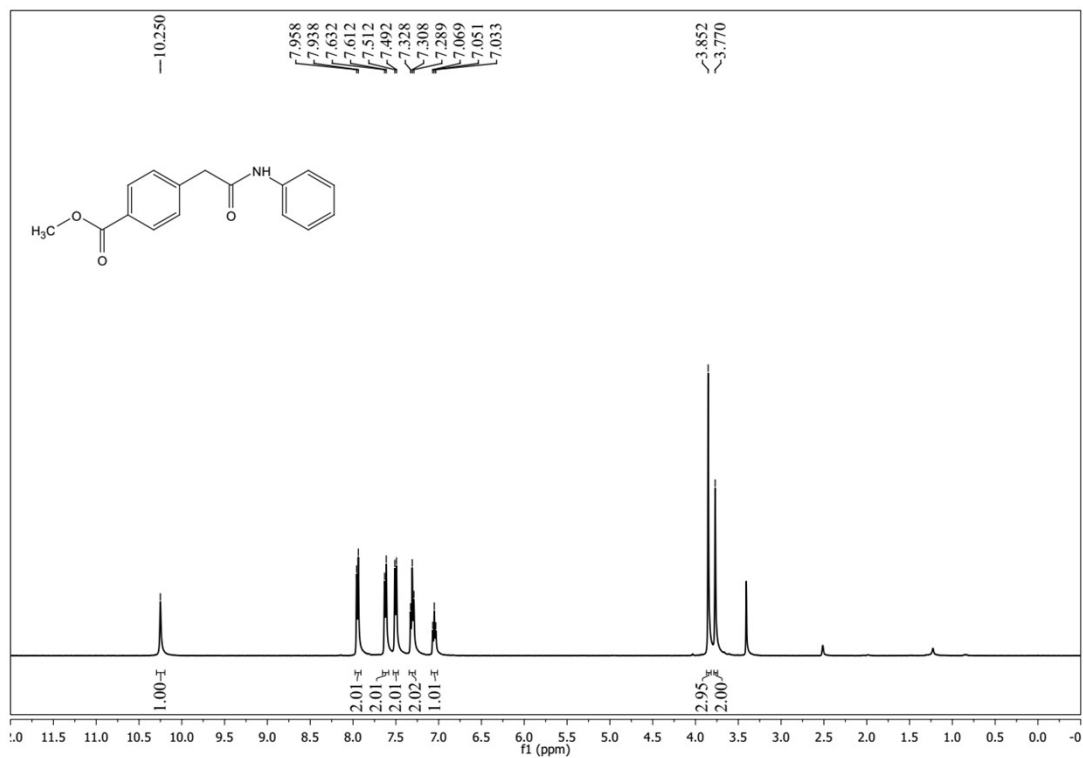

### <sup>13</sup>C NMR Spectra of 3ah

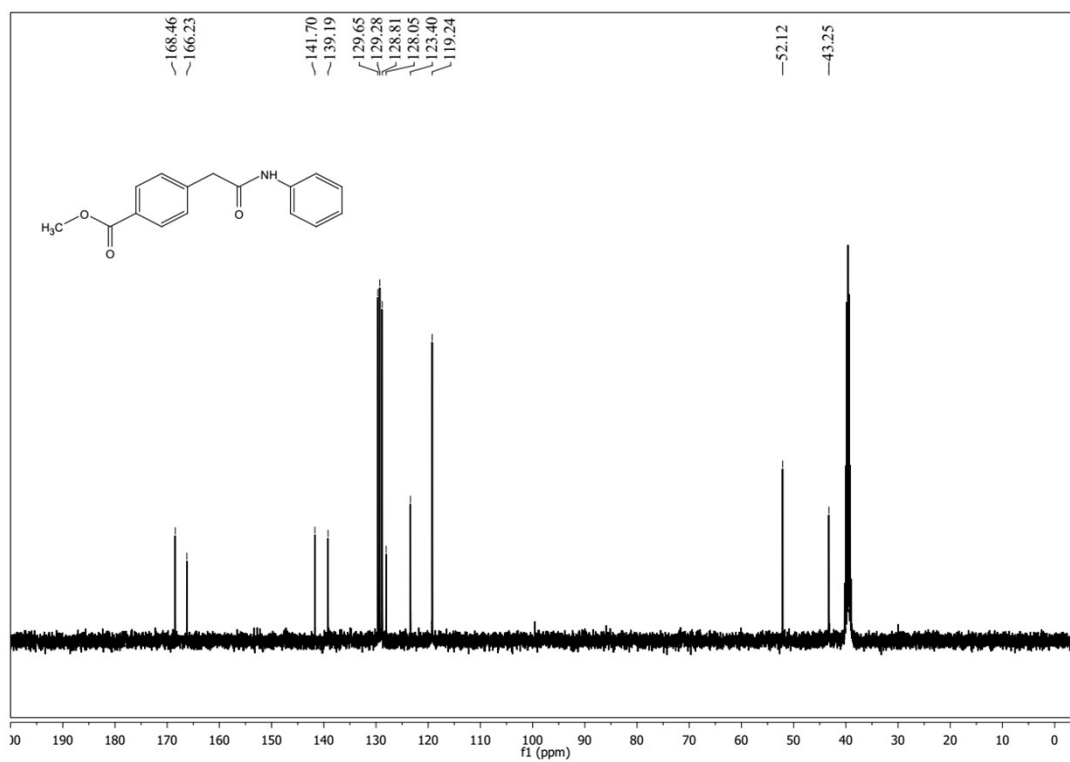

### <sup>1</sup>H NMR Spectra of 3ai

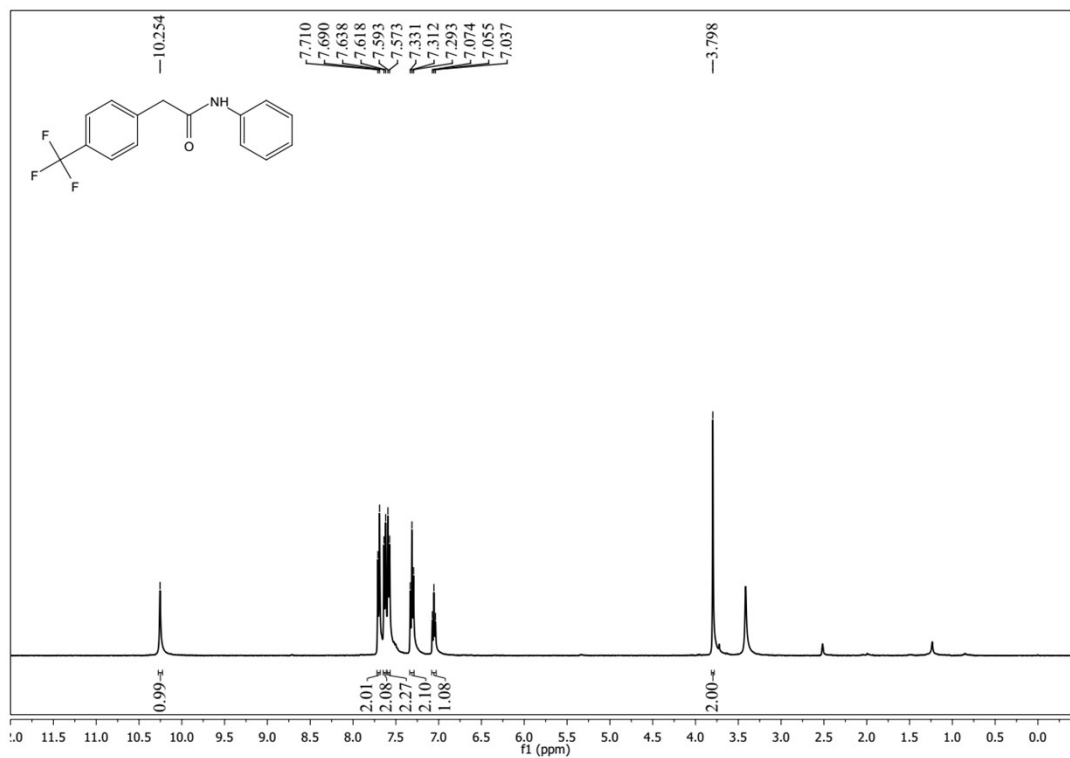

### <sup>13</sup>C NMR Spectra of 3ai

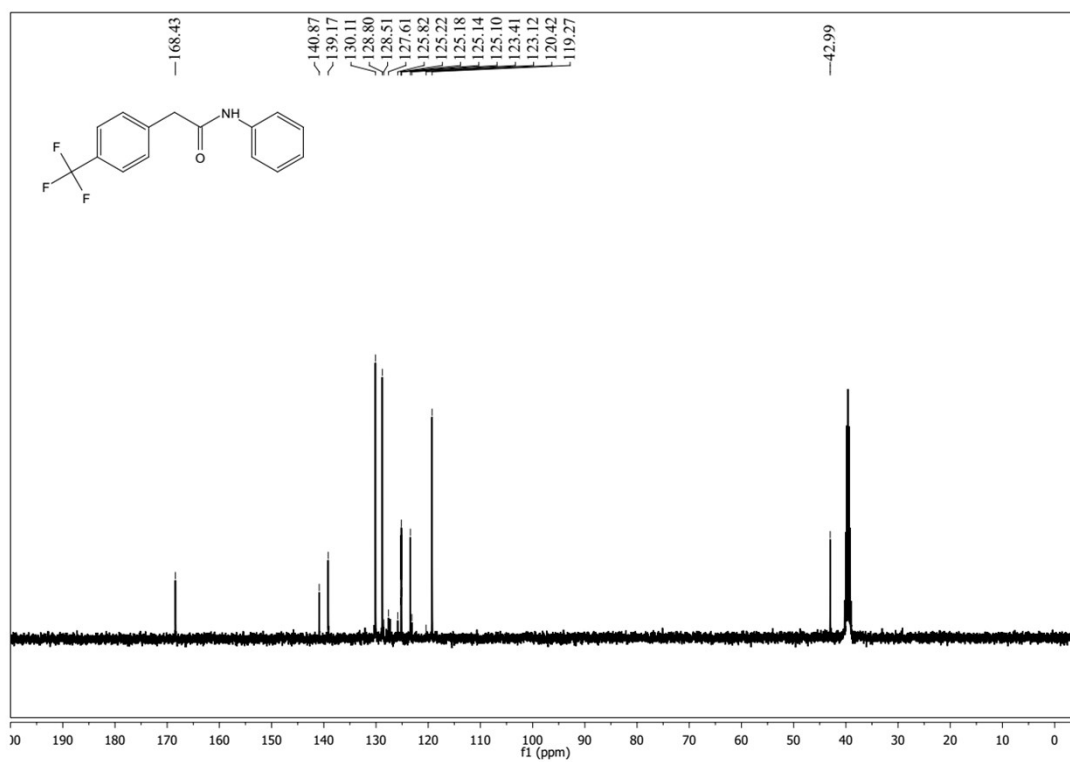

### <sup>1</sup>H NMR Spectra of 3aj

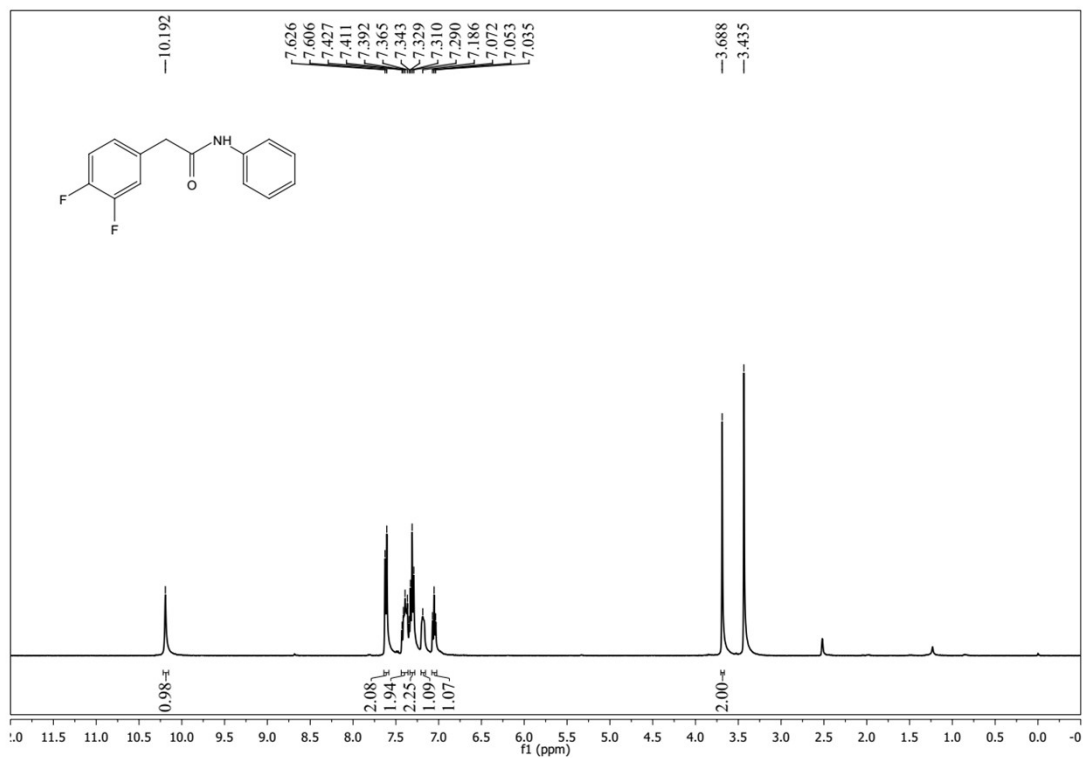

### <sup>13</sup>C NMR Spectra of 3aj

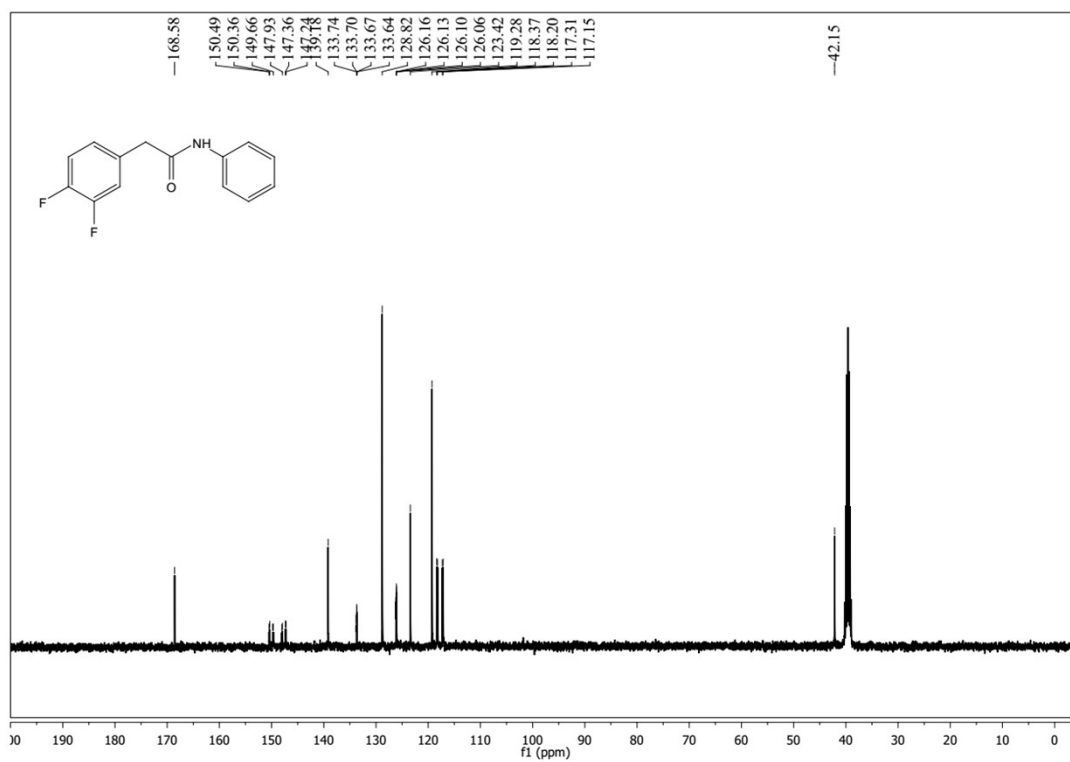

### <sup>1</sup>H NMR Spectra of 3ak



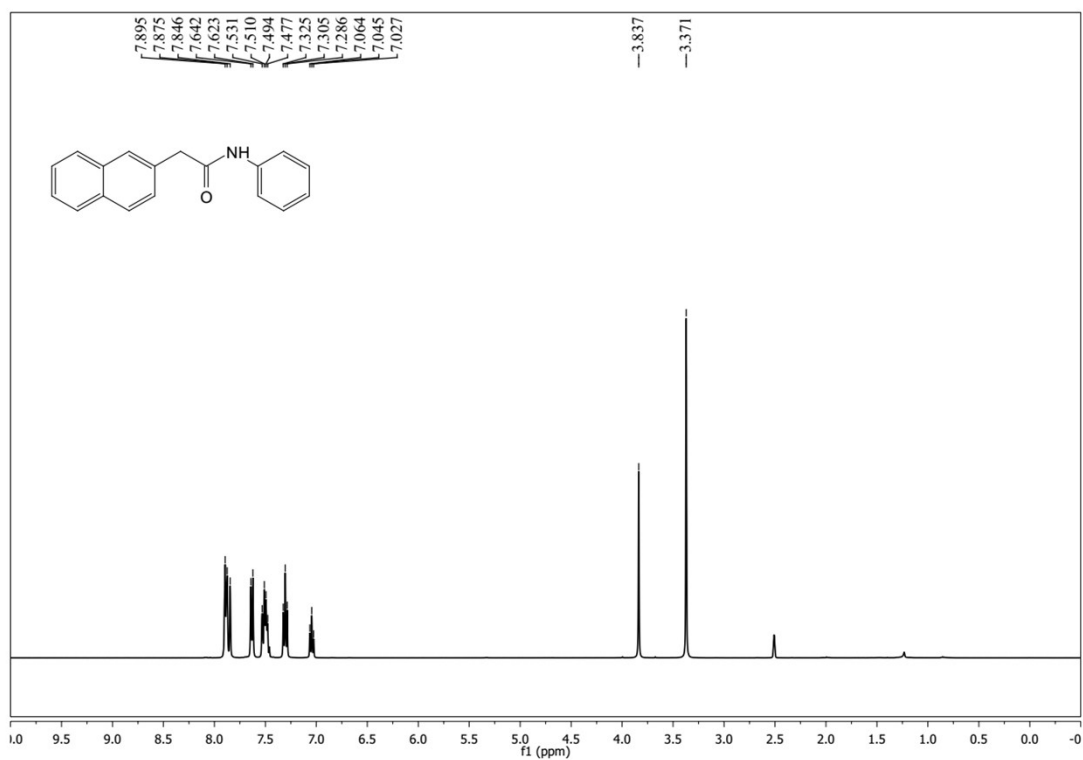

### <sup>13</sup>C NMR Spectra of 3ak

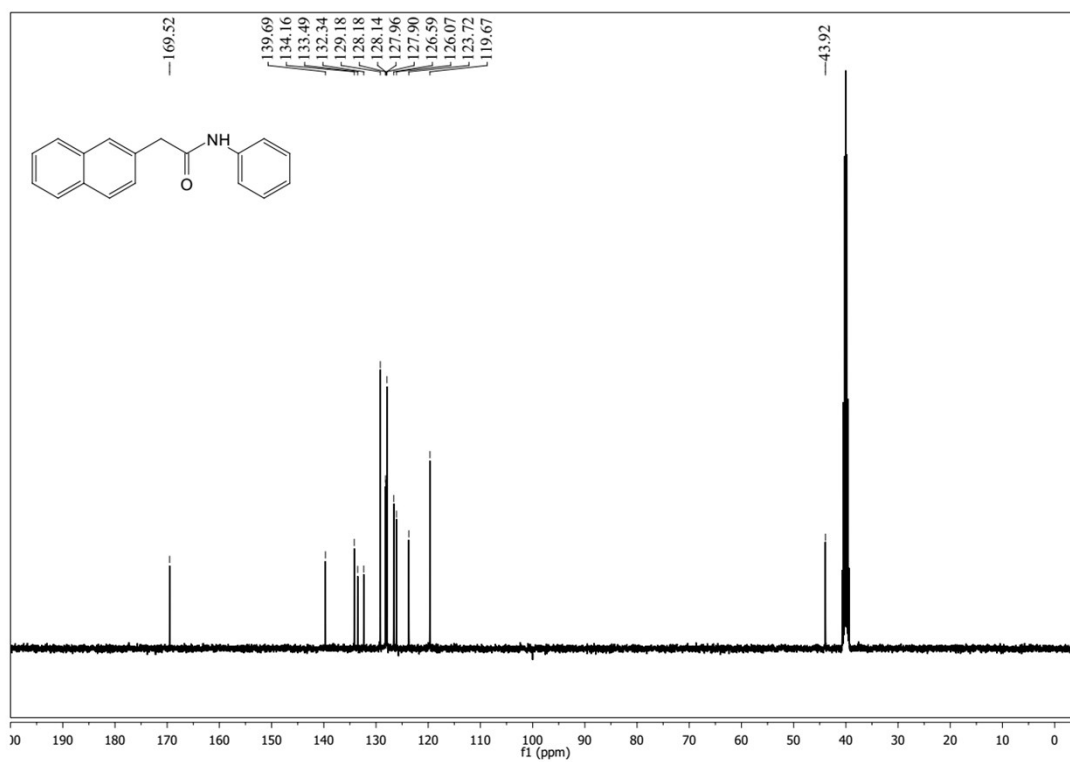

### <sup>1</sup>H NMR Spectra of 3al

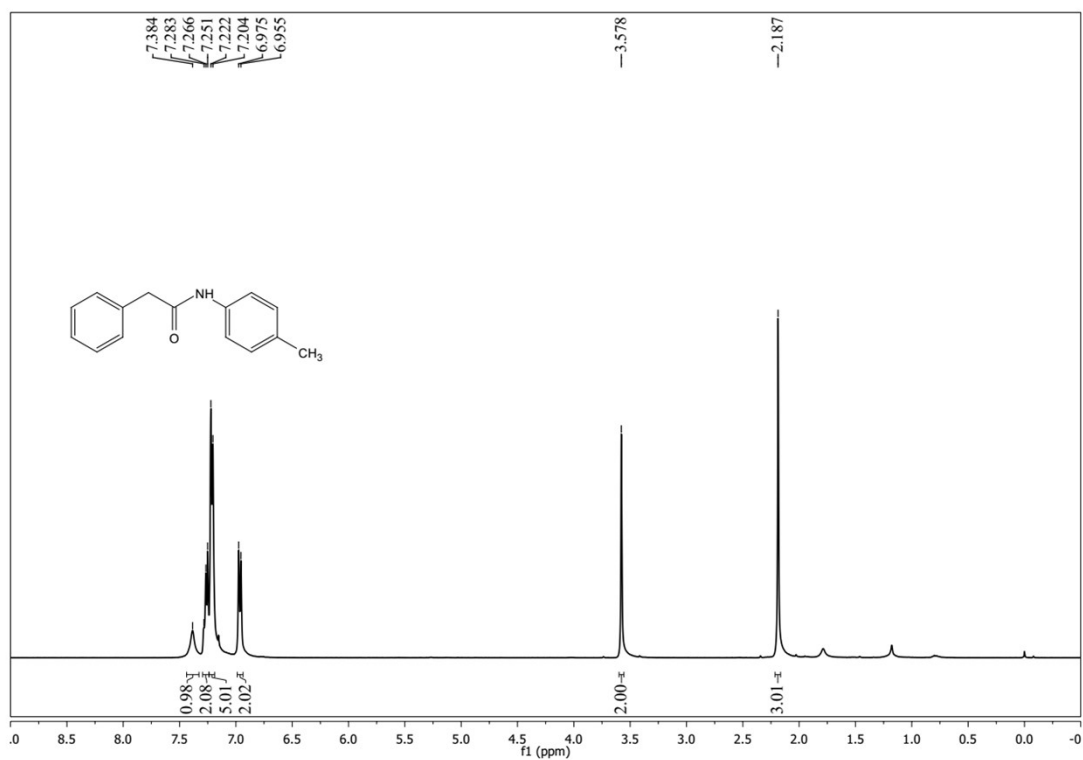

### <sup>13</sup>C NMR Spectra of 3aI

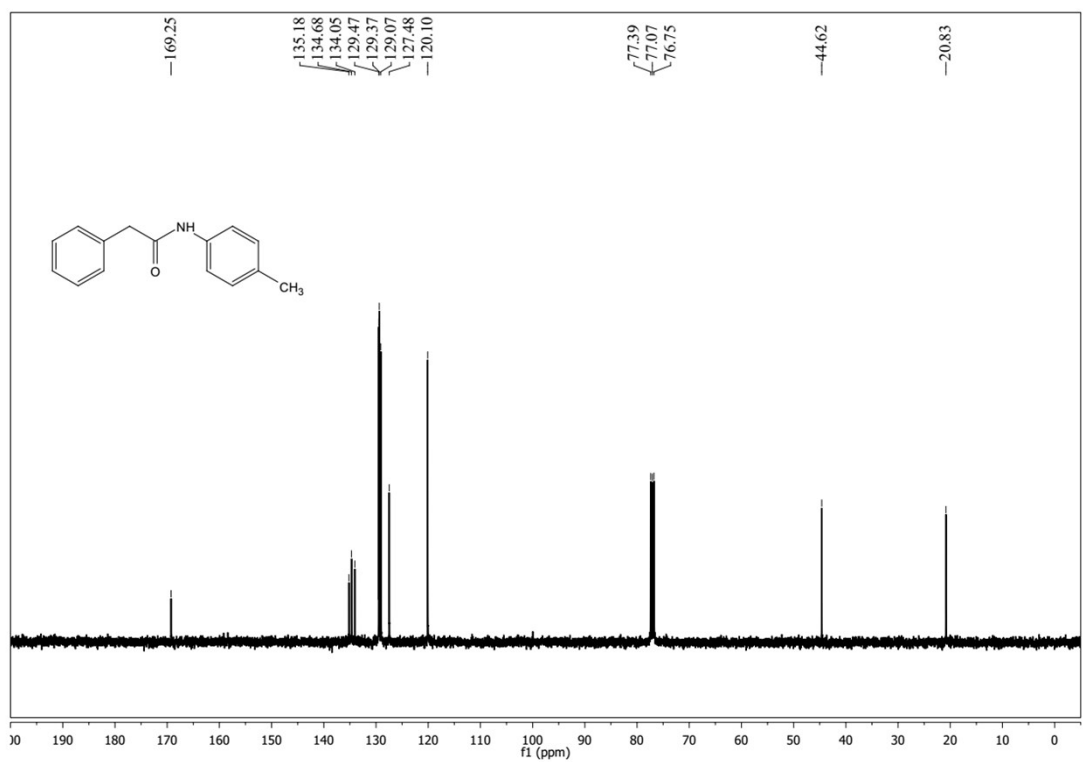

### <sup>1</sup>H NMR Spectra of 3aM

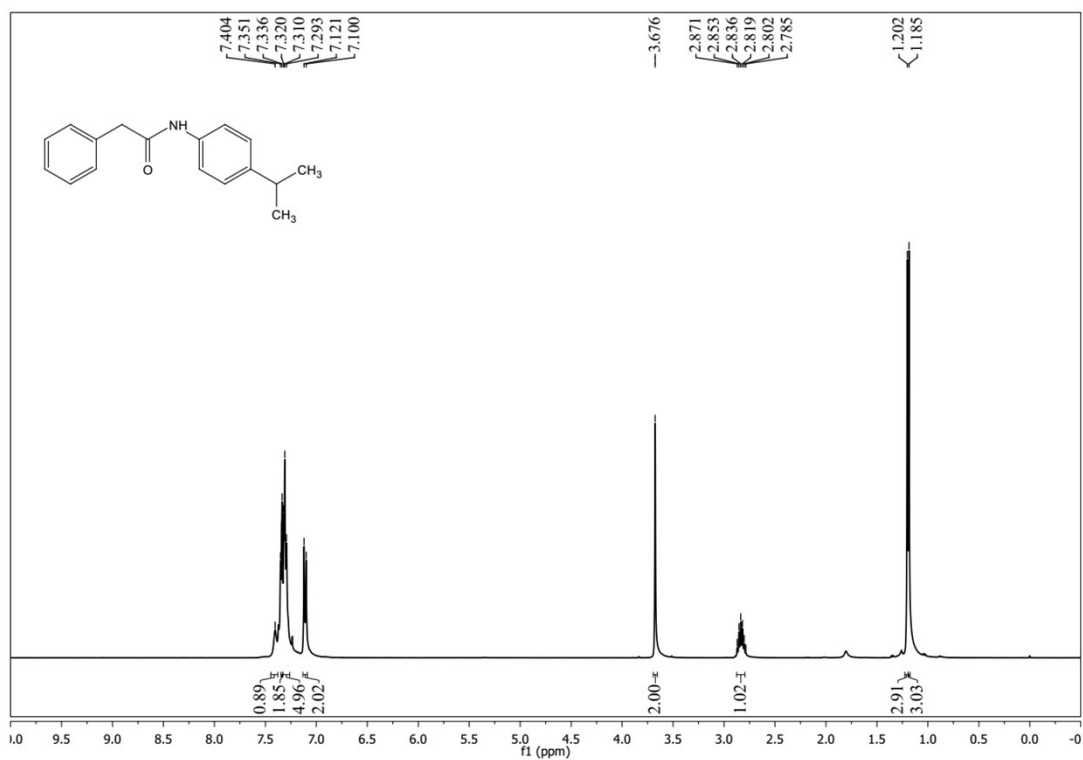

### <sup>13</sup>C NMR Spectra of 3am

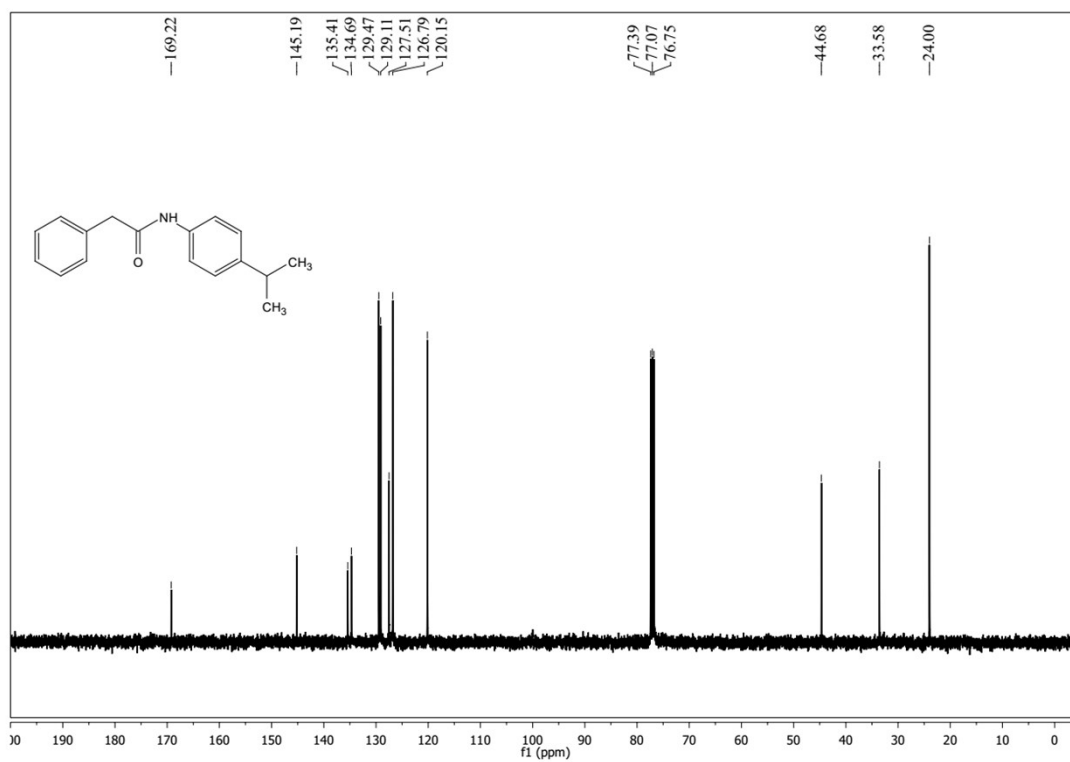

### <sup>1</sup>H NMR Spectra of 3an

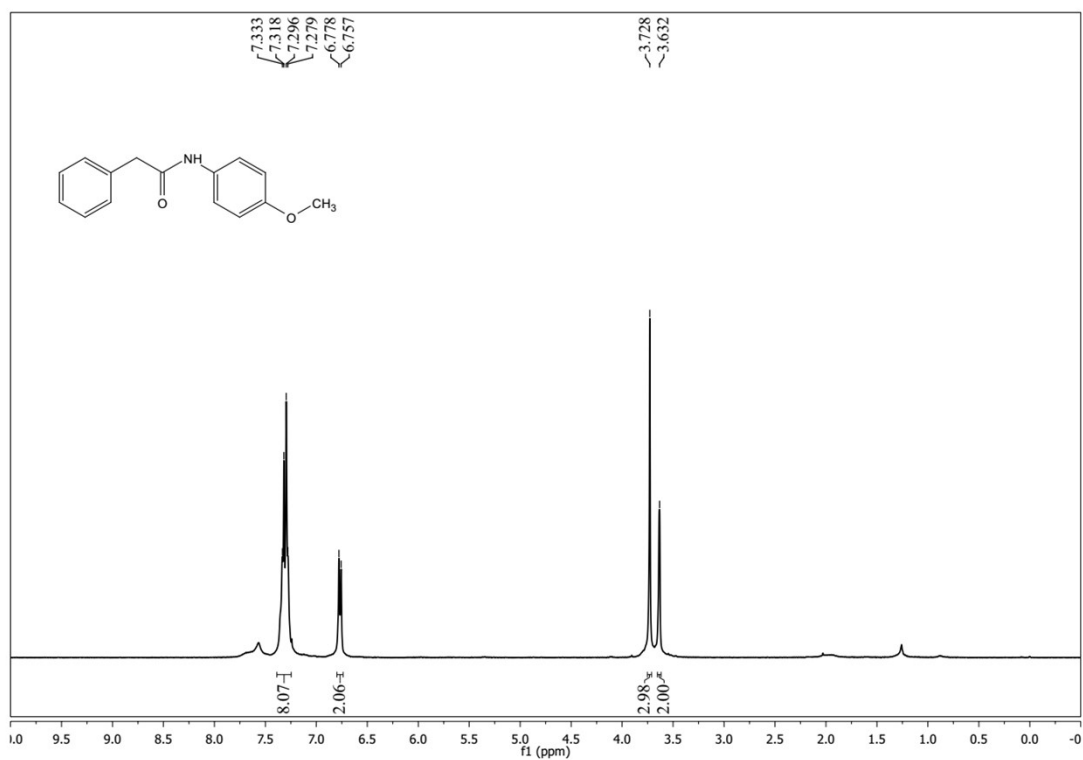

### <sup>13</sup>C NMR Spectra of 3am

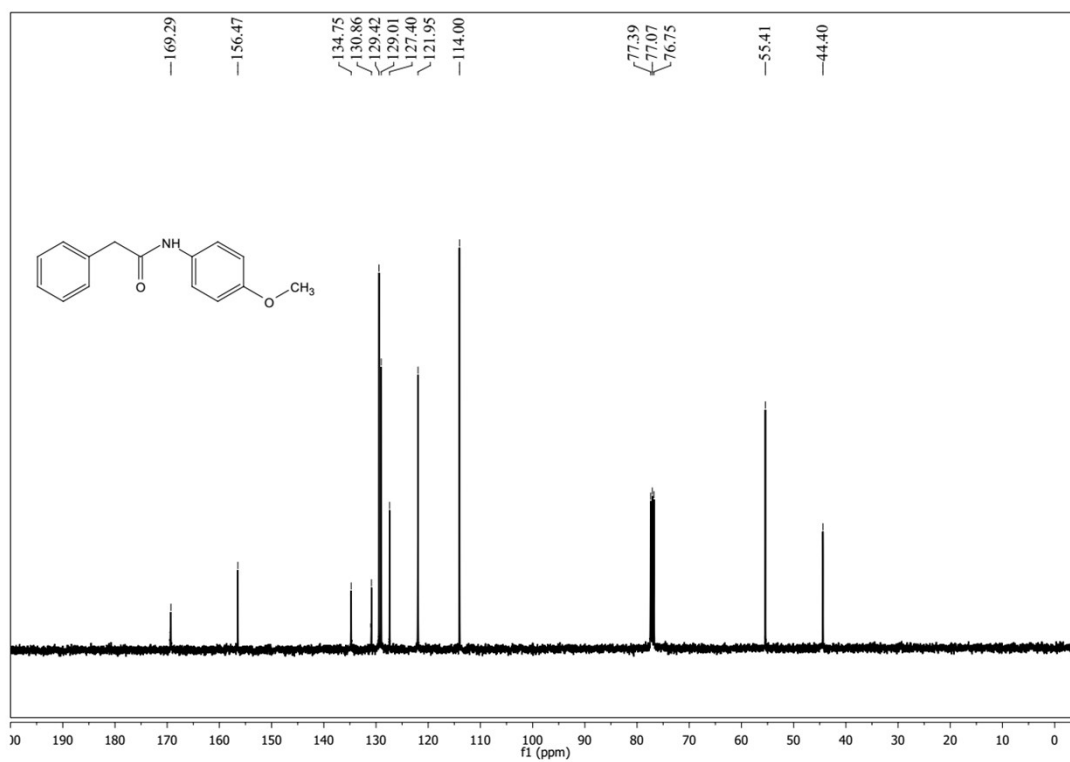

### <sup>1</sup>H NMR Spectra of 3ao

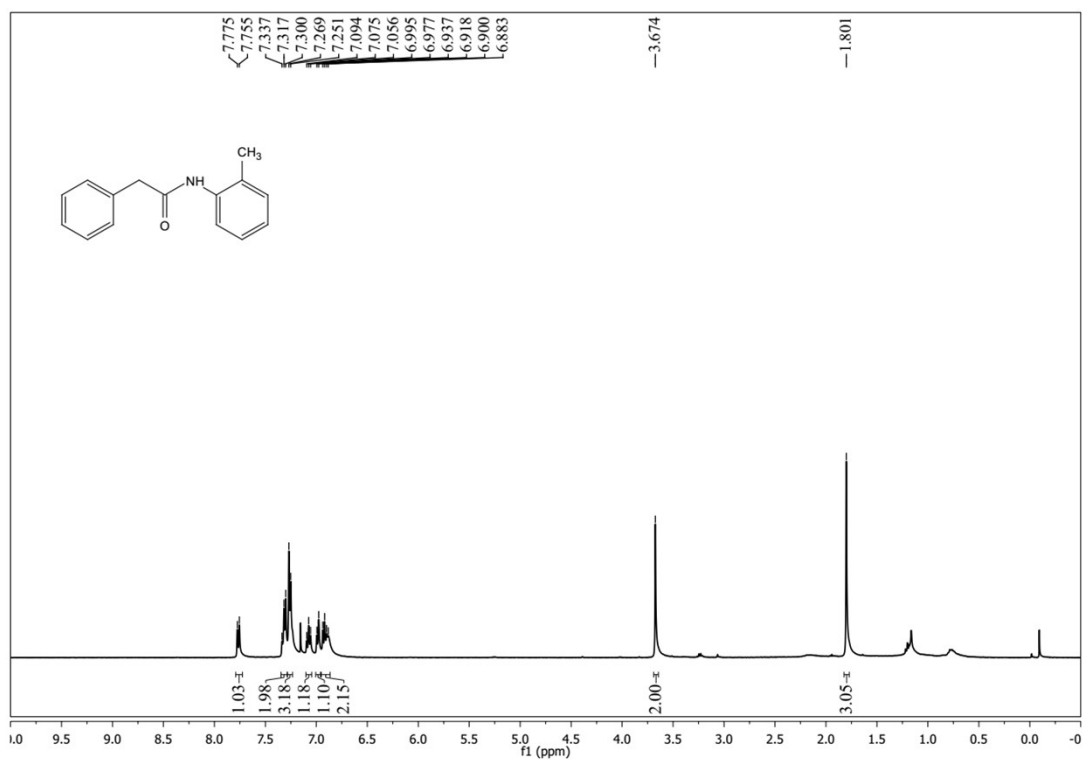

### <sup>13</sup>C NMR Spectra of 3ao

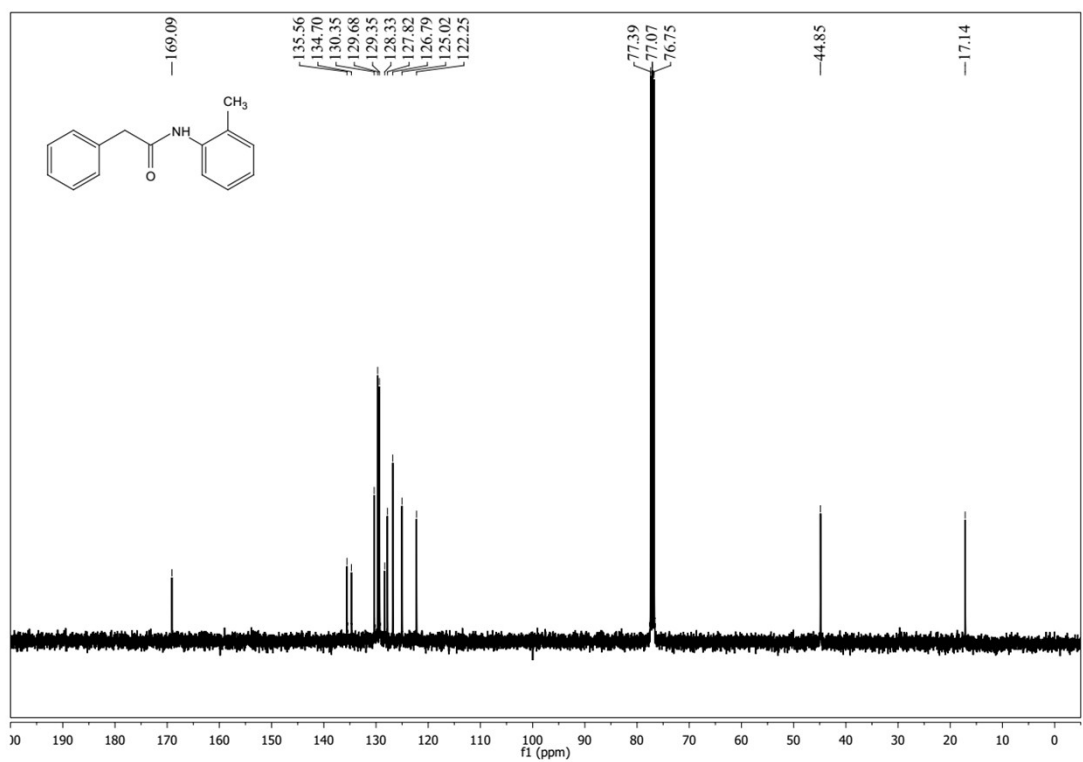

### <sup>1</sup>H NMR Spectra of 3ap

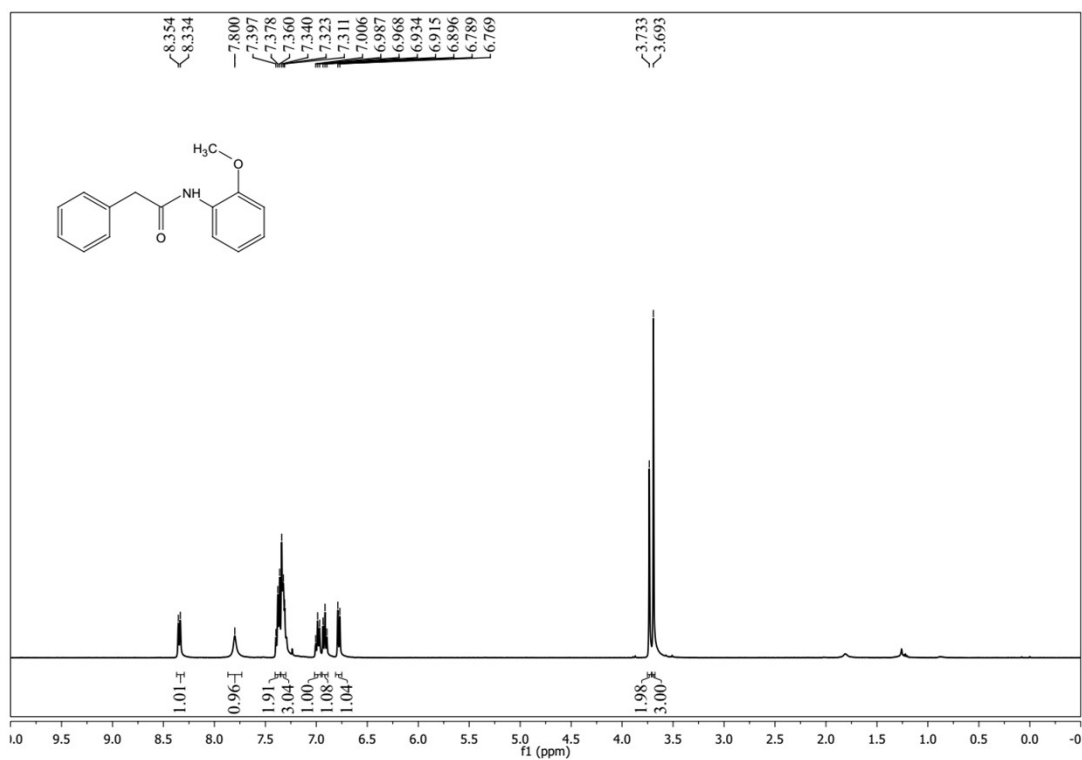

### <sup>13</sup>C NMR Spectra of 3ap

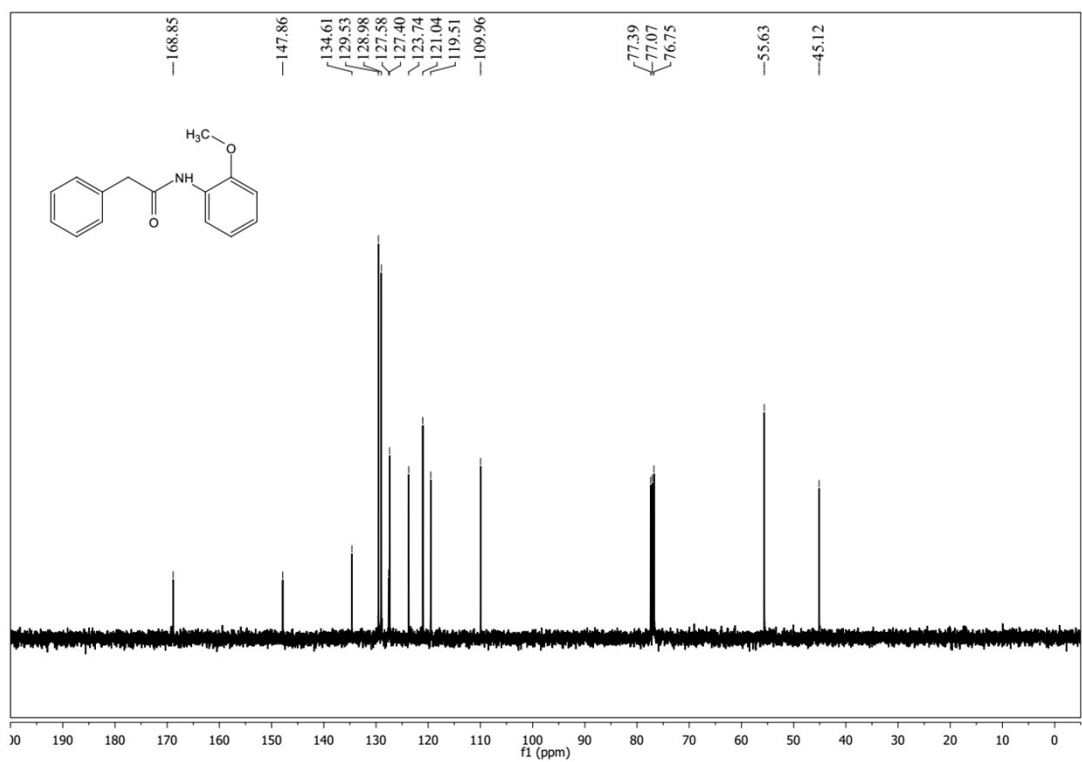

### <sup>1</sup>H NMR Spectra of 3aq

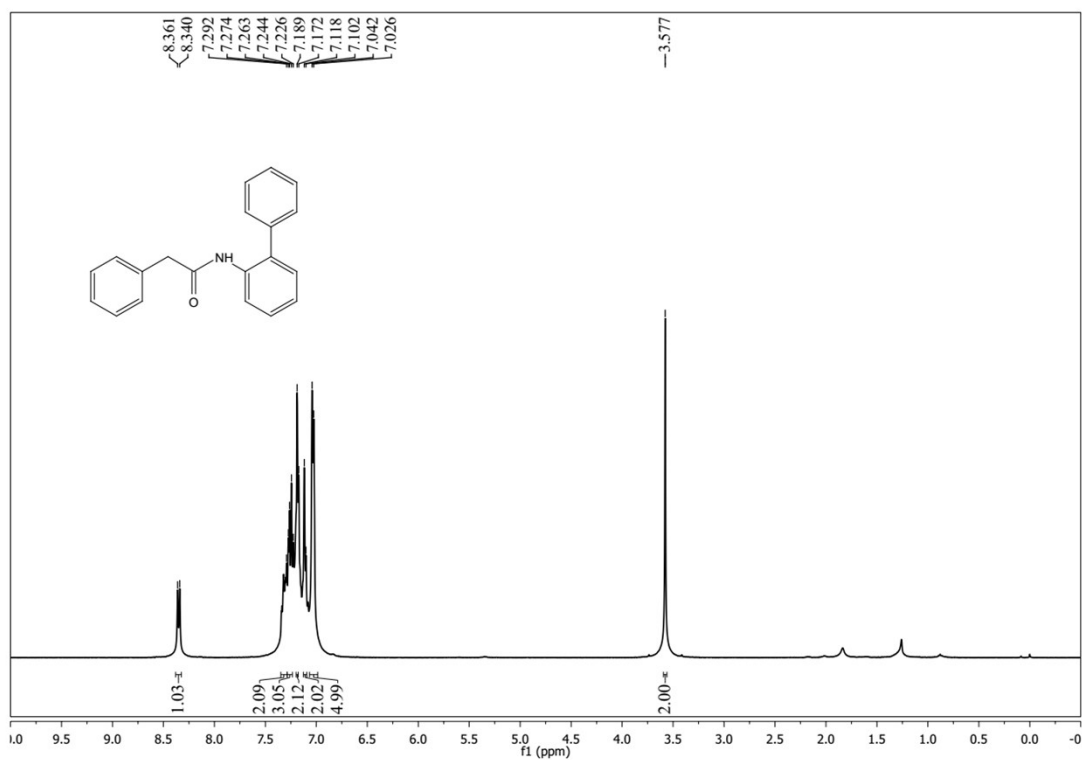

### <sup>13</sup>C NMR Spectra of 3aq

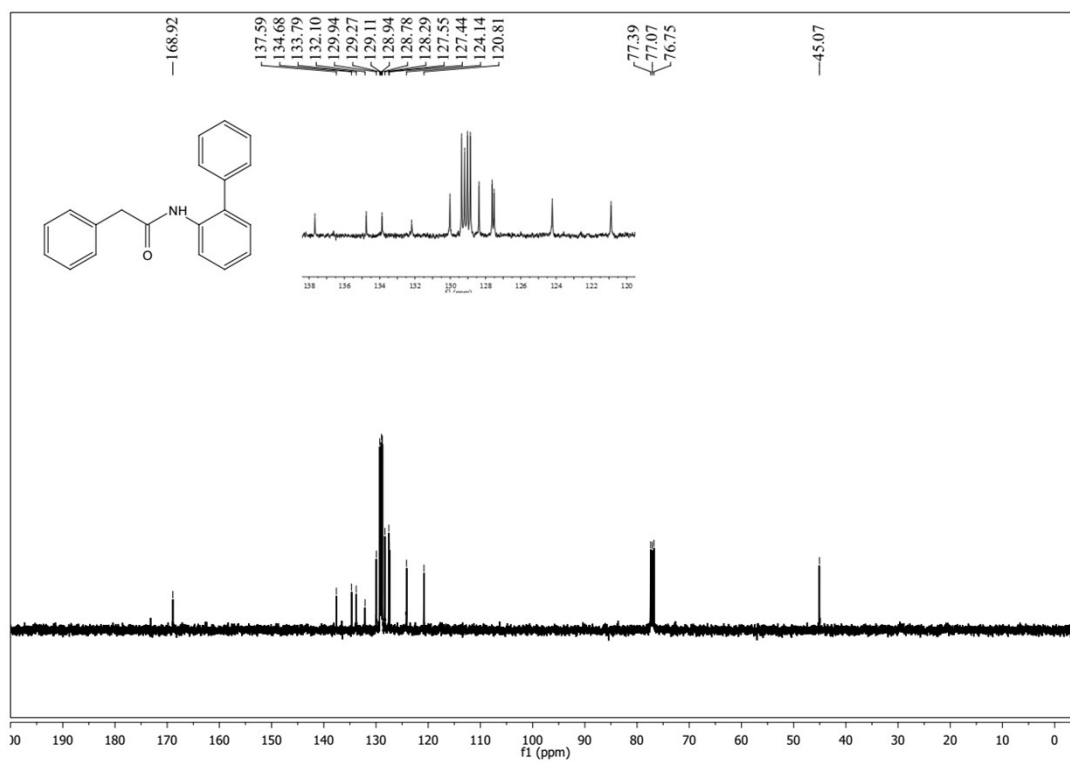

### <sup>1</sup>H NMR Spectra of 3ar

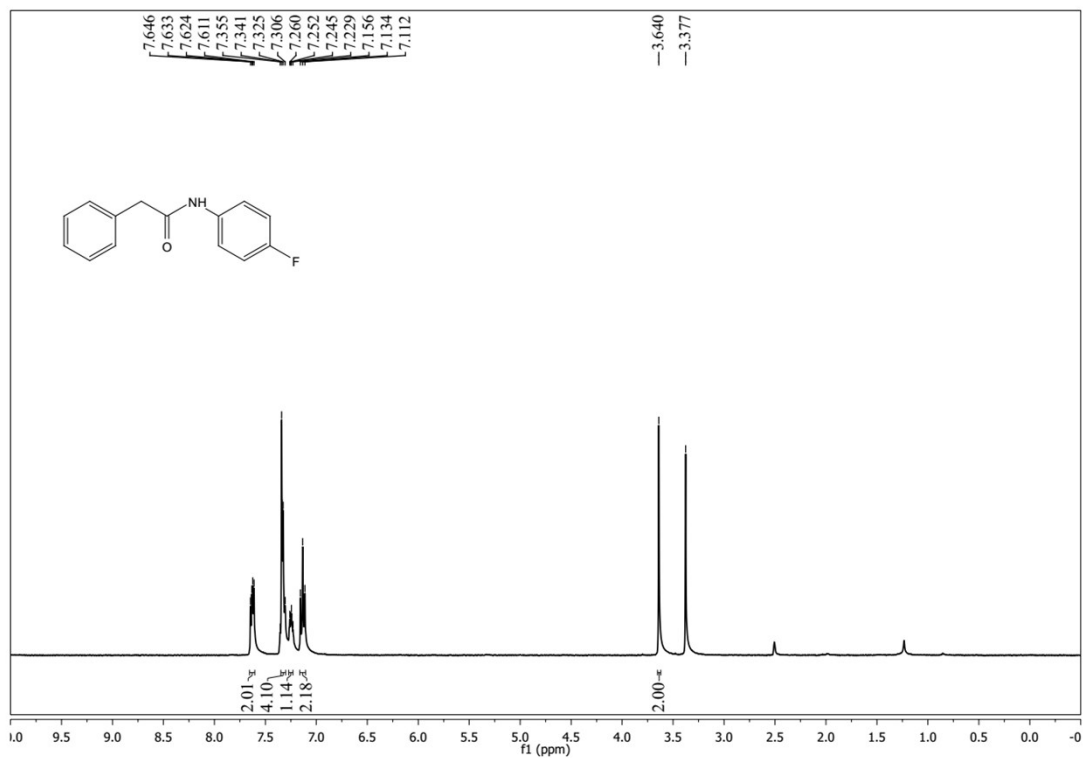

### <sup>13</sup>C NMR Spectra of 3ar

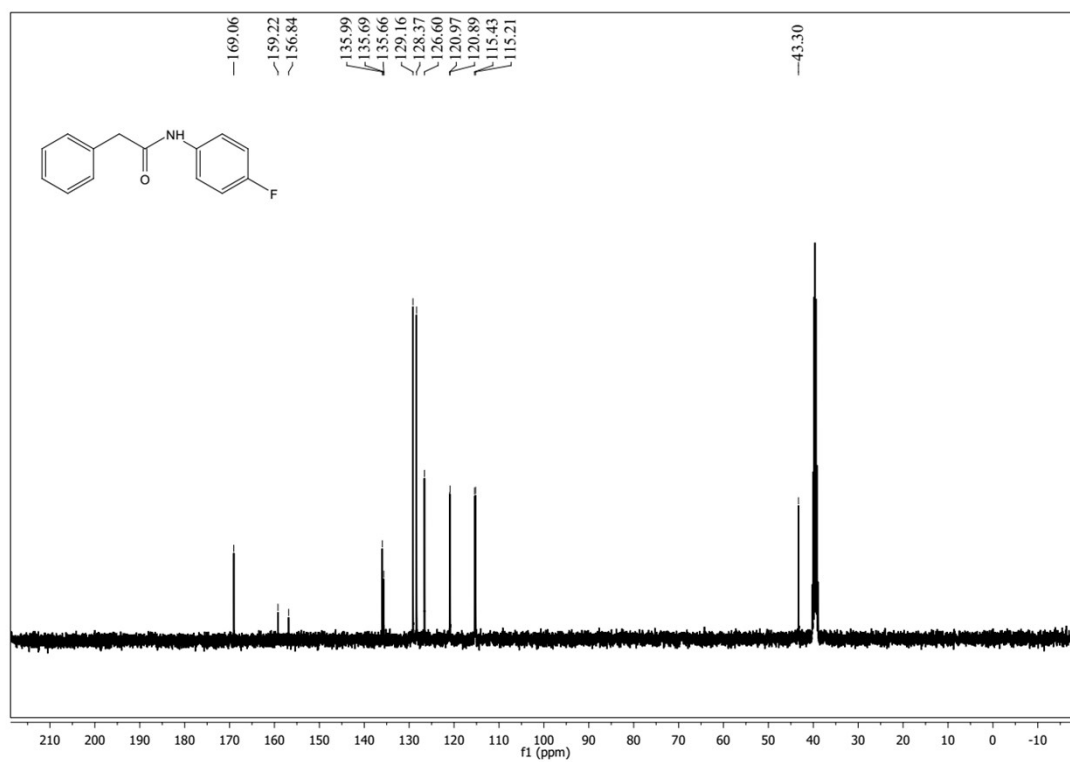

### <sup>1</sup>H NMR Spectra of 3as



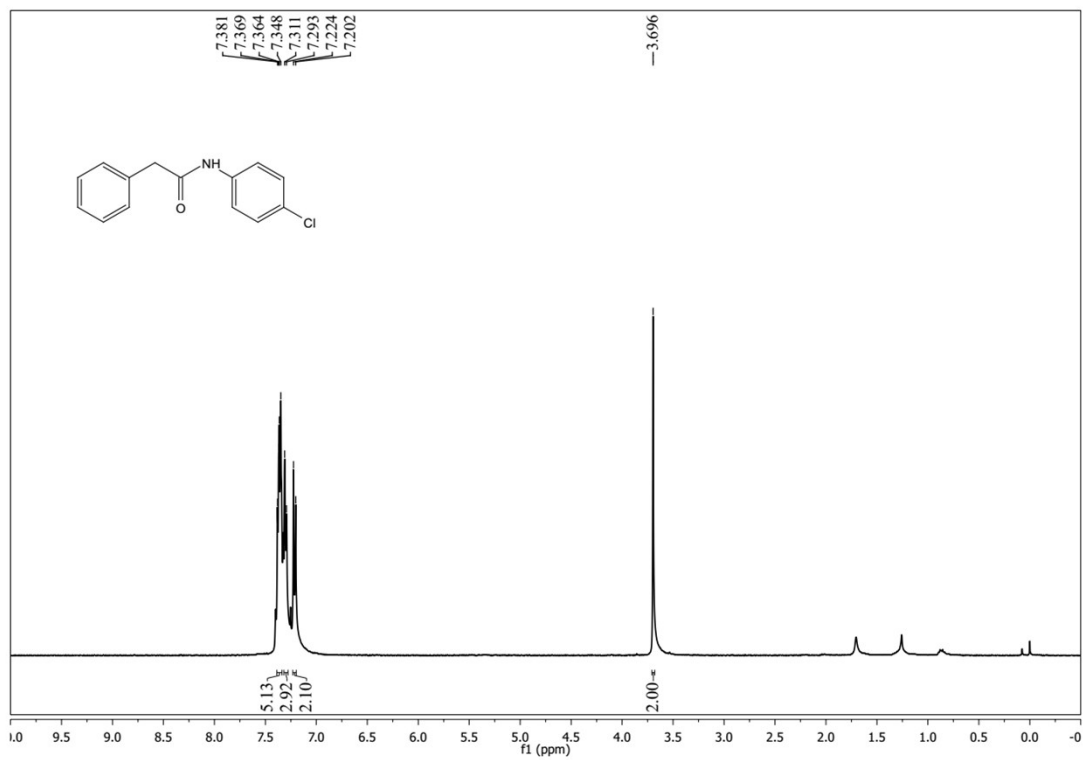

### <sup>13</sup>C NMR Spectra of 3as

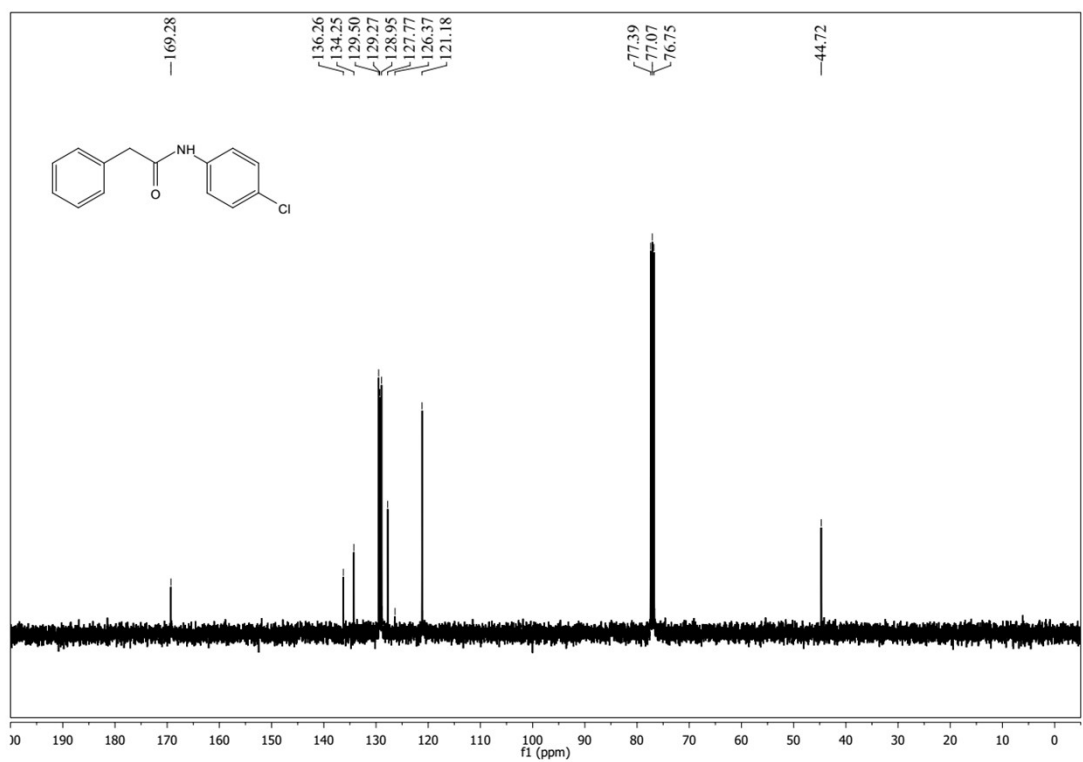

### <sup>1</sup>H NMR Spectra of 3at

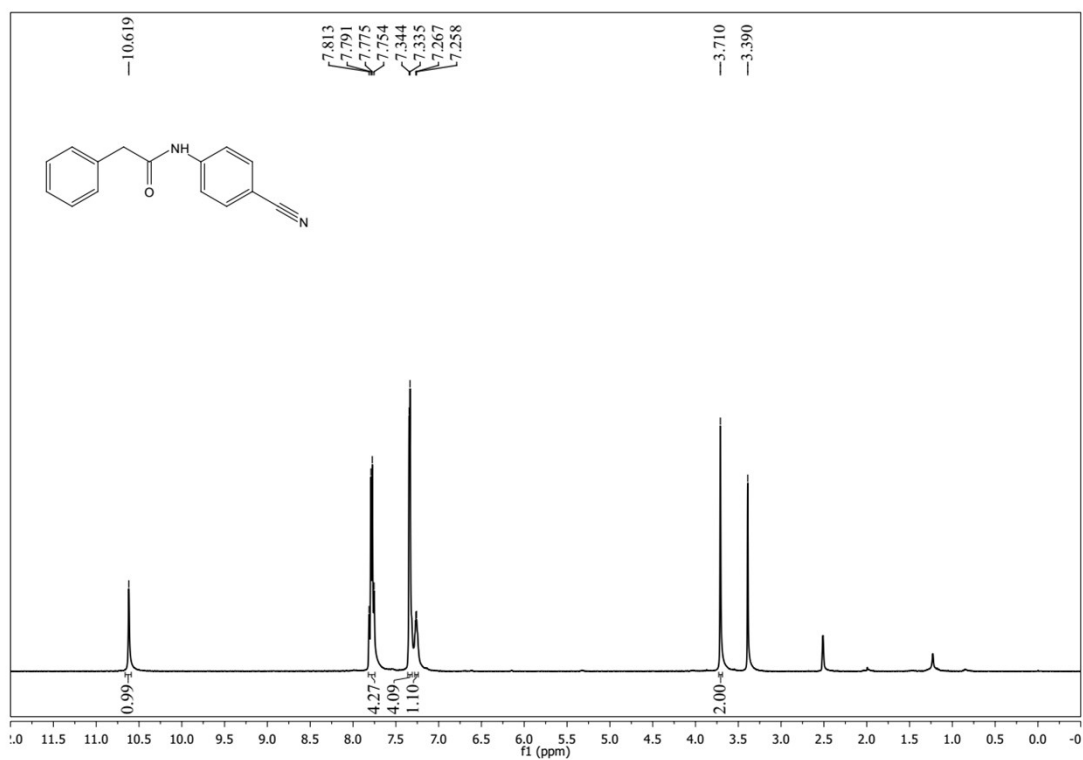

### <sup>13</sup>C NMR Spectra of 3at

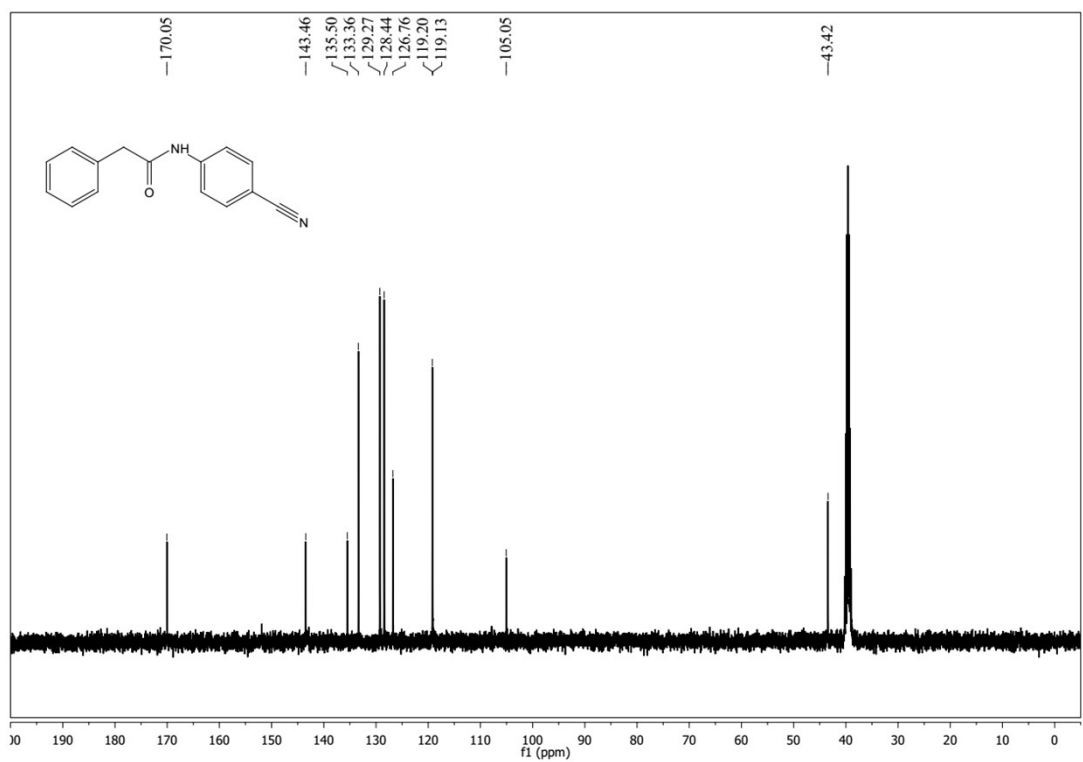

### <sup>1</sup>H NMR Spectra of 3au

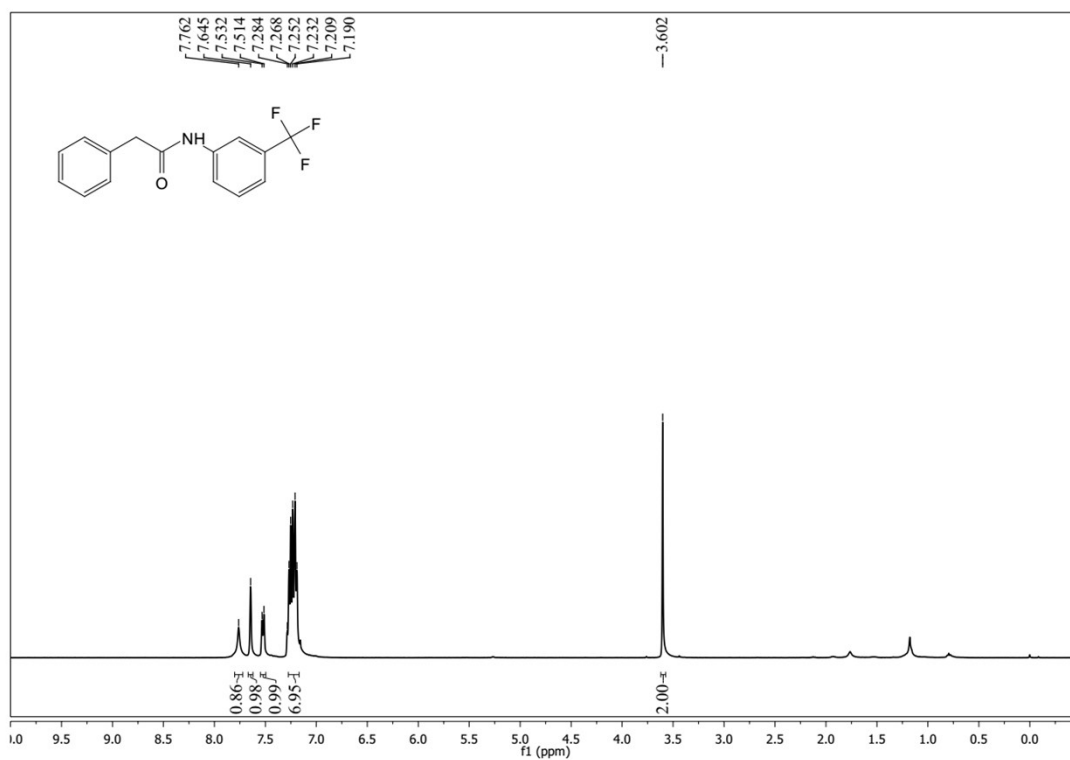

### <sup>13</sup>C NMR Spectra of 3au

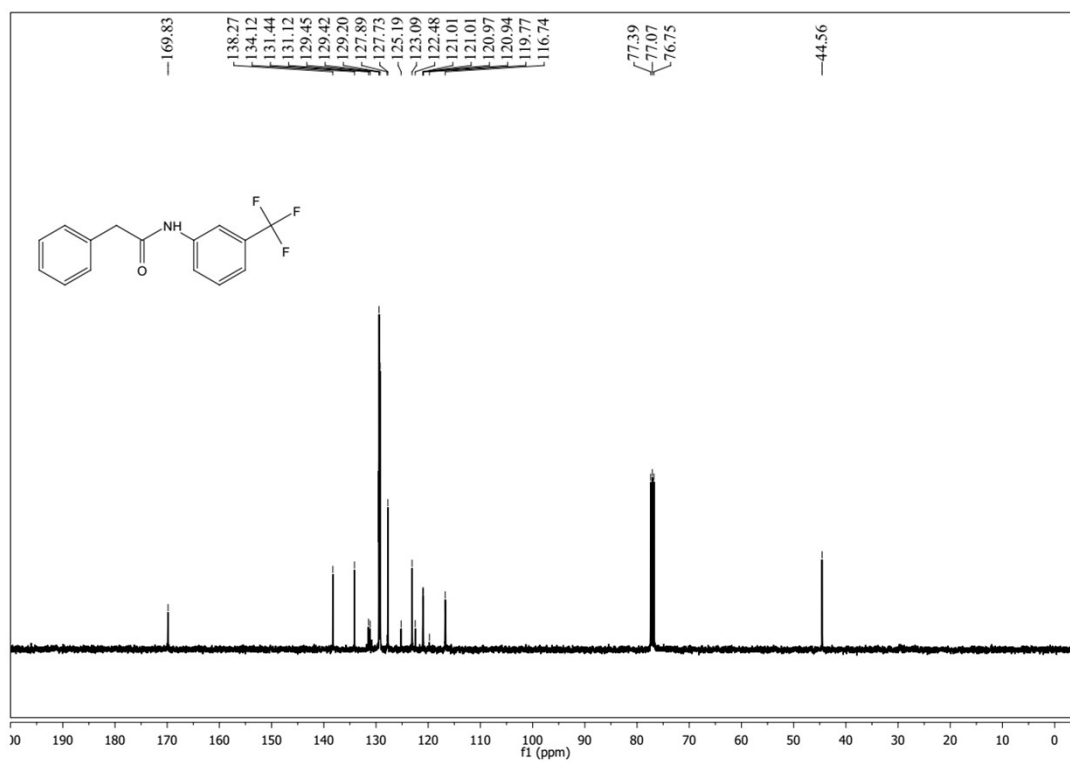

### <sup>1</sup>H NMR Spectra of 3av

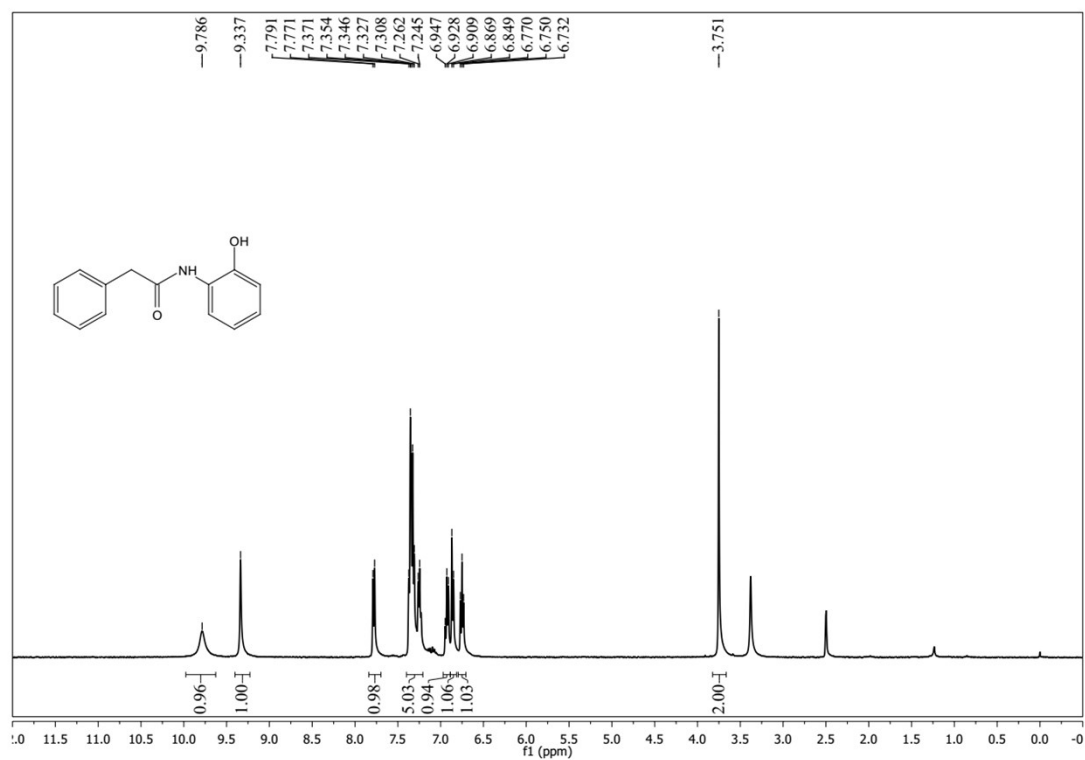

**<sup>13</sup>C NMR Spectra of 3av**

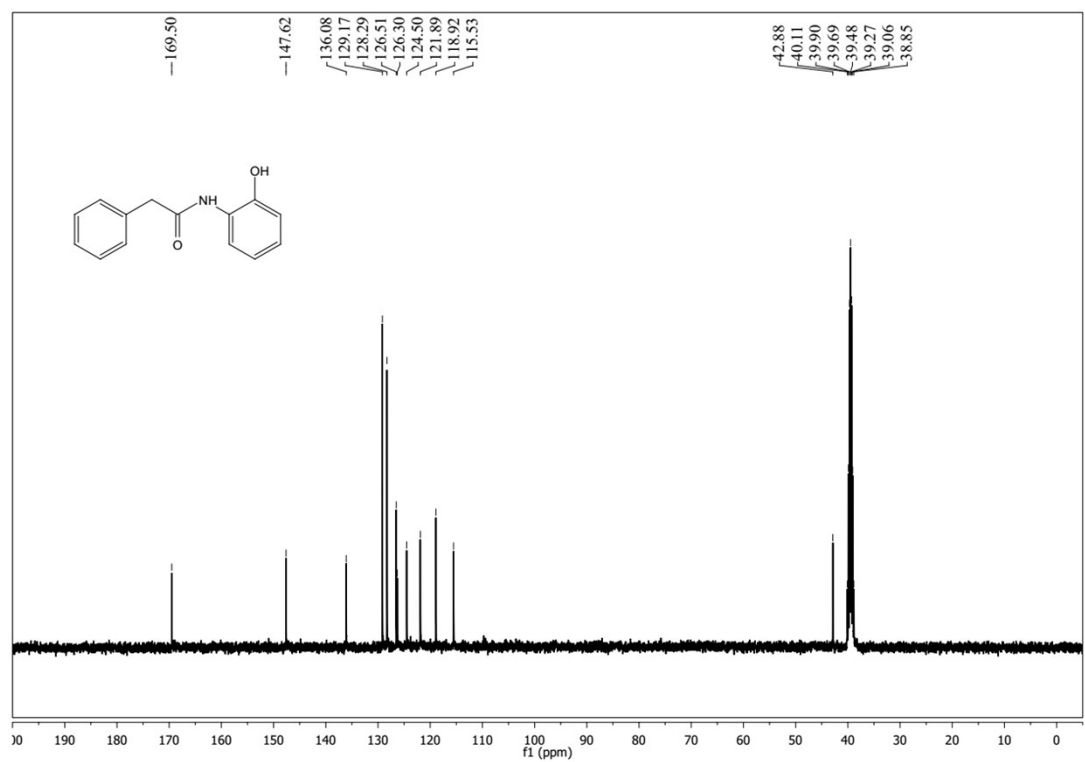

**<sup>1</sup>H NMR Spectra of 3aw**

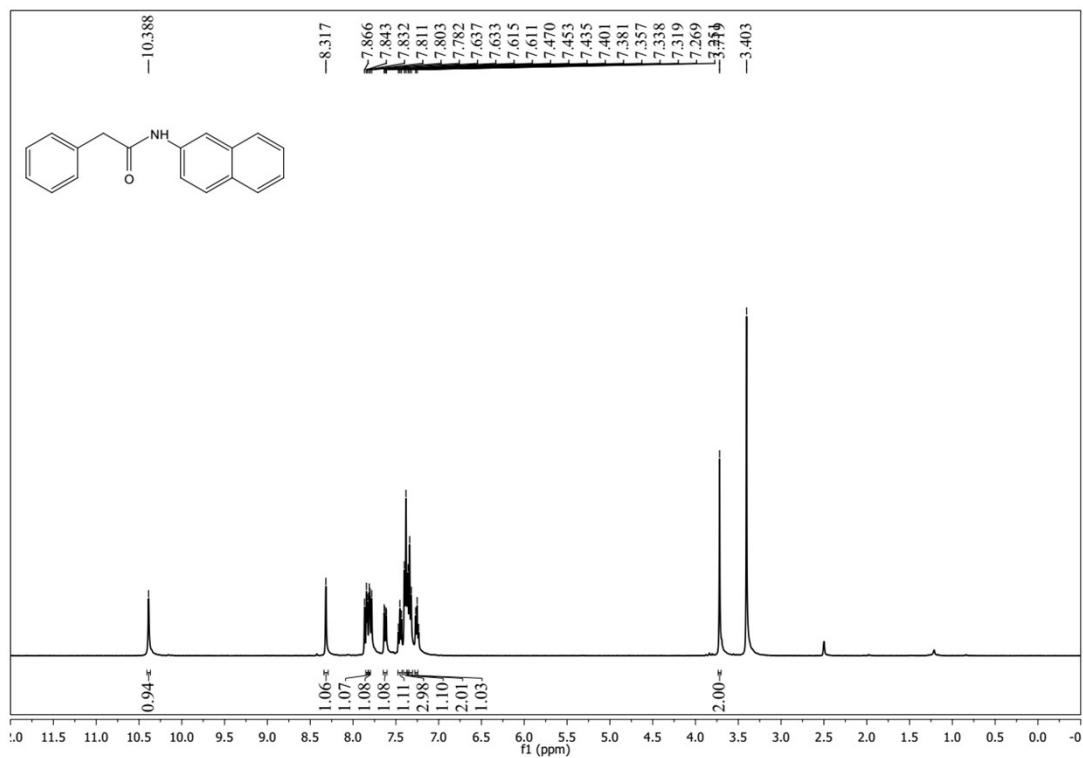

### <sup>13</sup>C NMR Spectra of 3aw

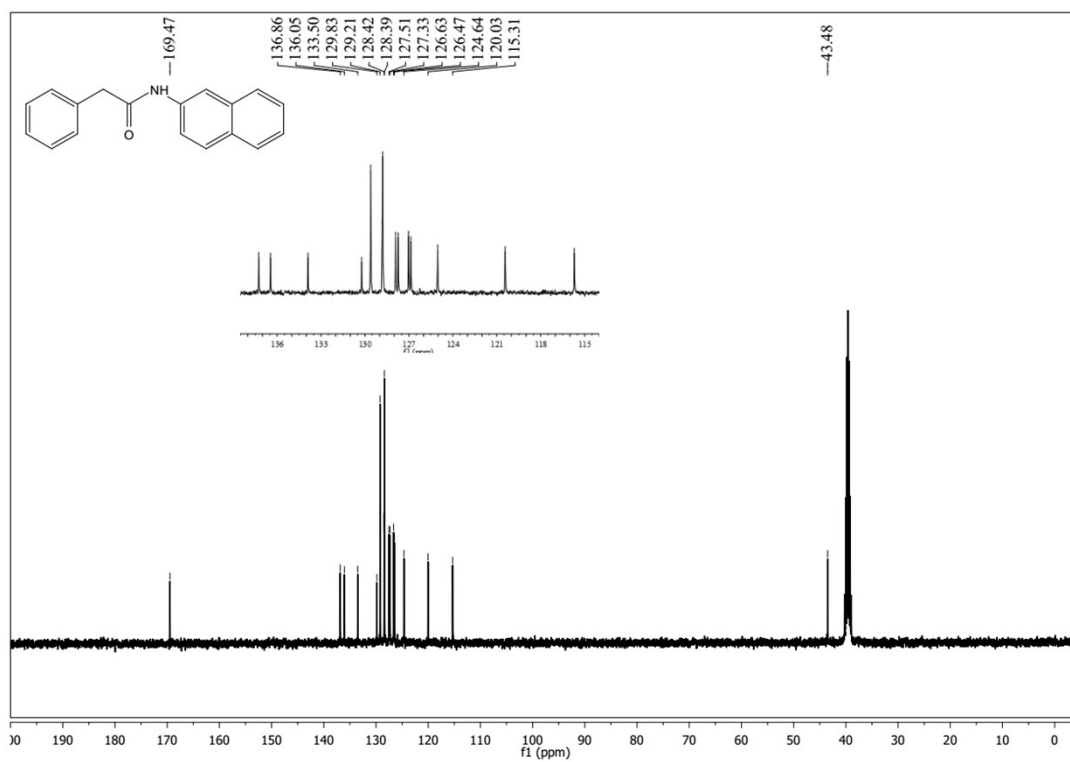

### <sup>1</sup>H NMR Spectra of 3ax

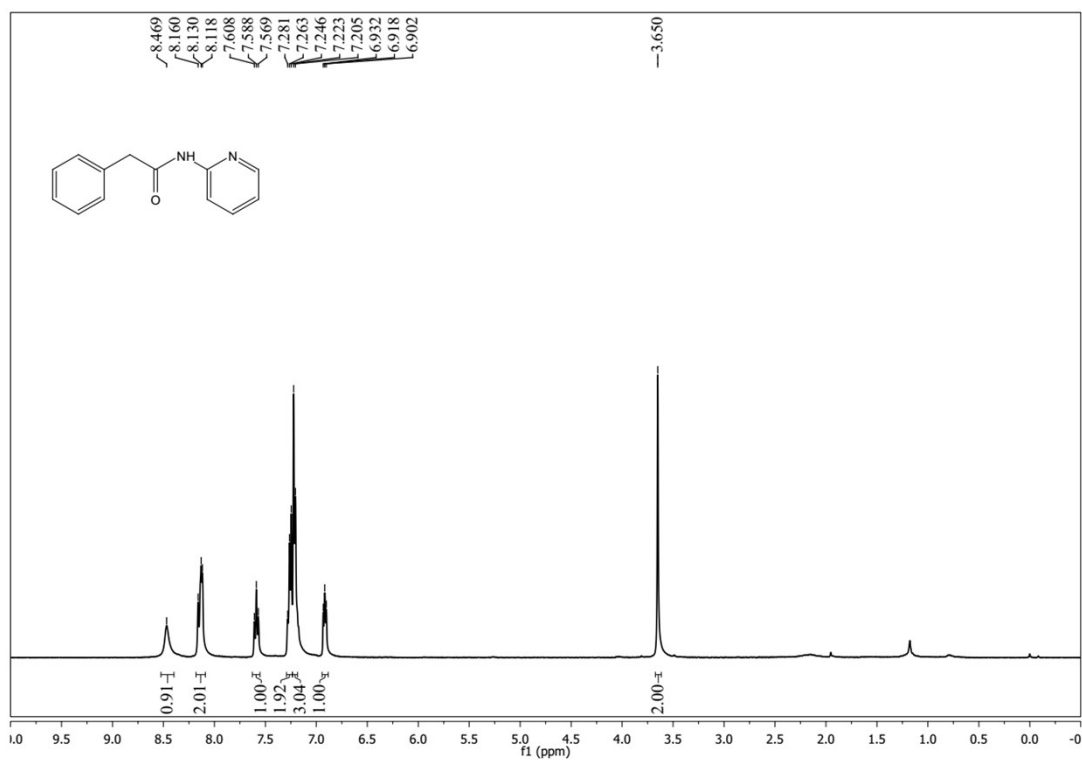

### <sup>13</sup>C NMR Spectra of 3ax

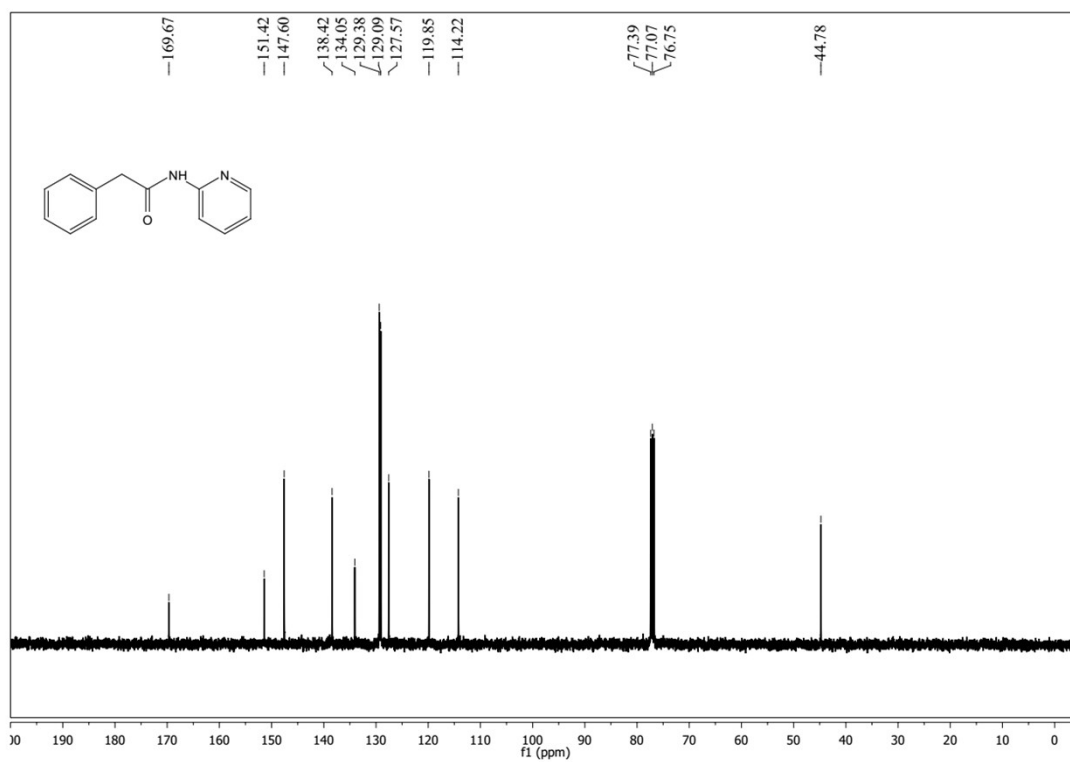

### <sup>1</sup>H NMR Spectra of 3ay

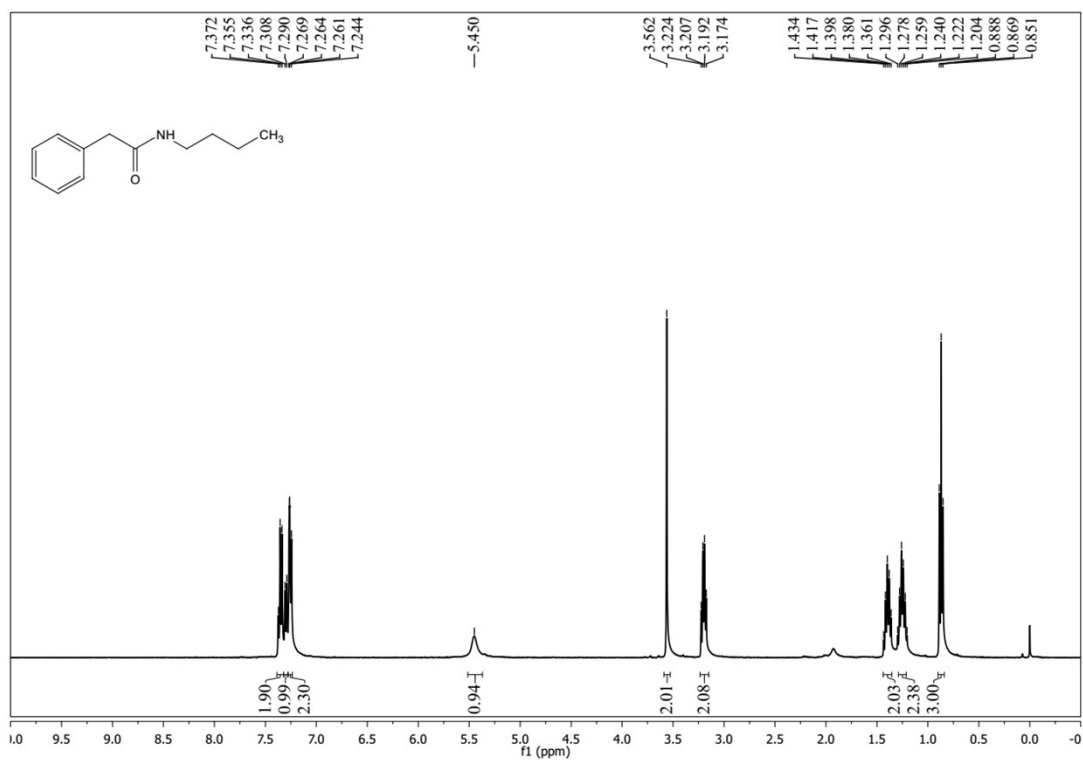

### <sup>13</sup>C NMR Spectra of 3ay

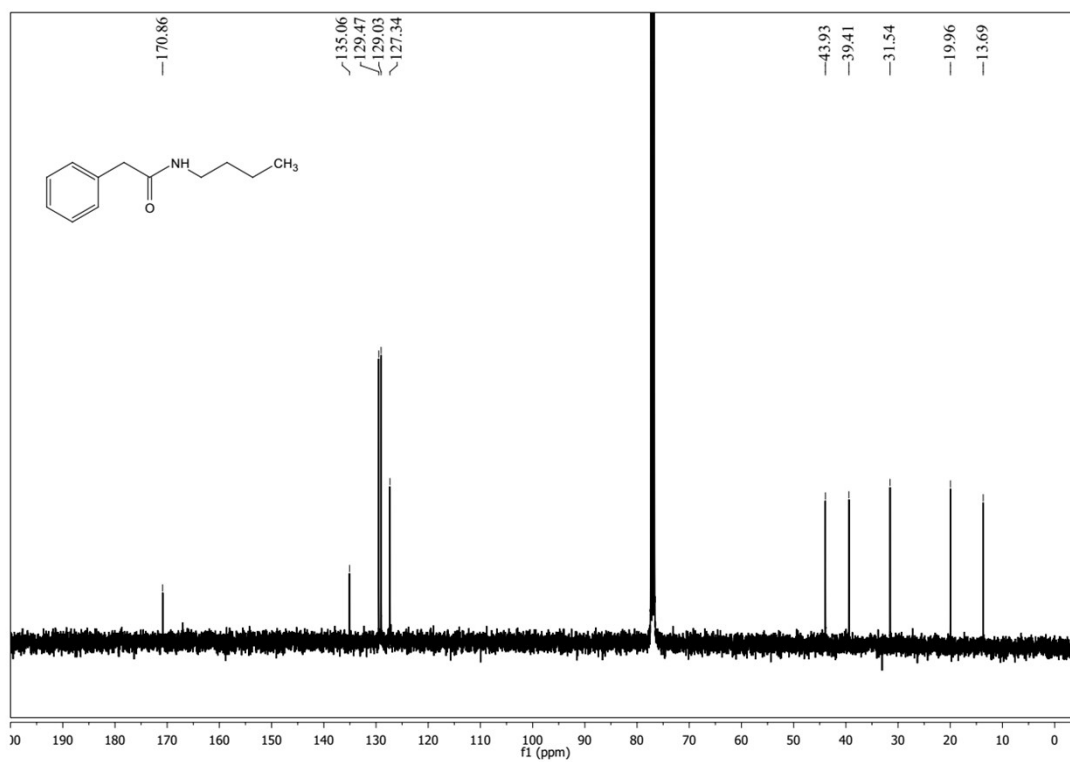

### <sup>1</sup>H NMR Spectra of 3az

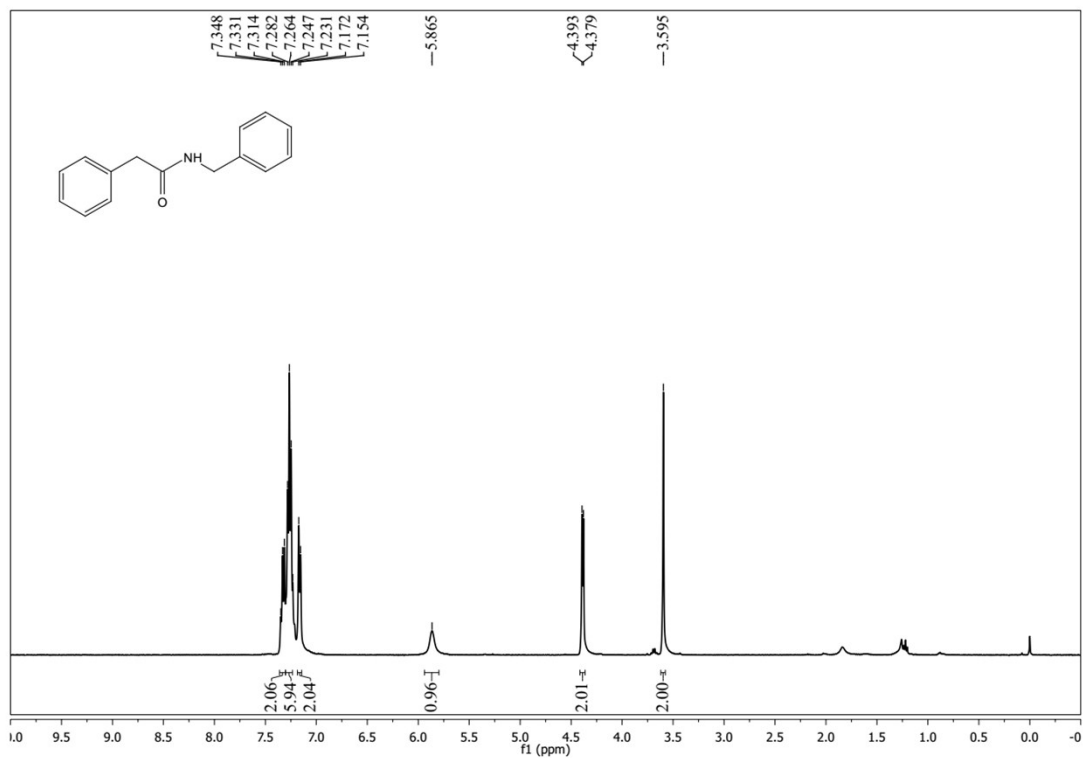

**<sup>13</sup>C NMR Spectra of 3az**

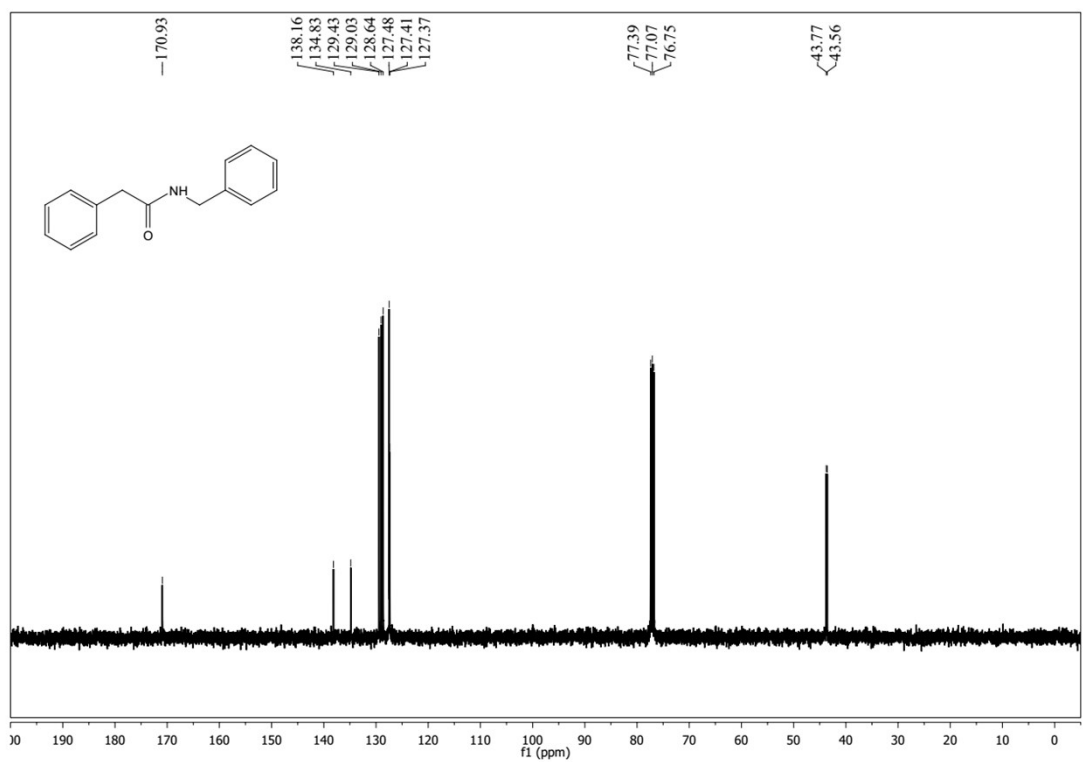

**<sup>1</sup>H NMR Spectra of 3ba**



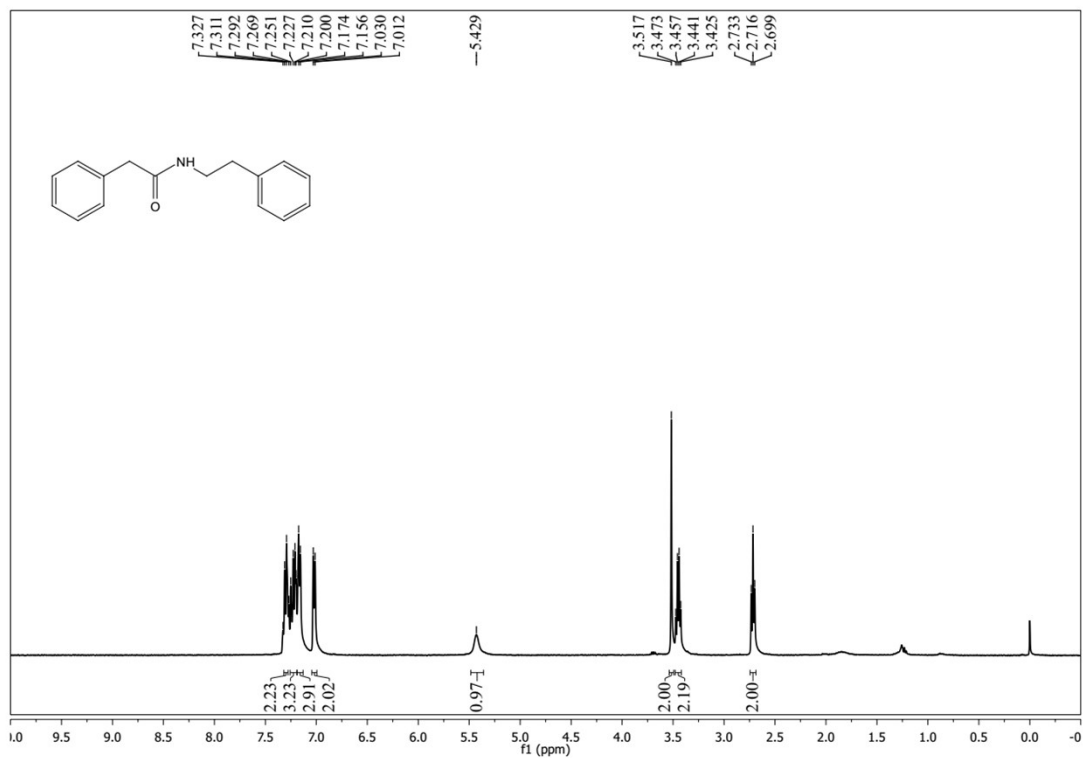

### <sup>13</sup>C NMR Spectra of 3ba

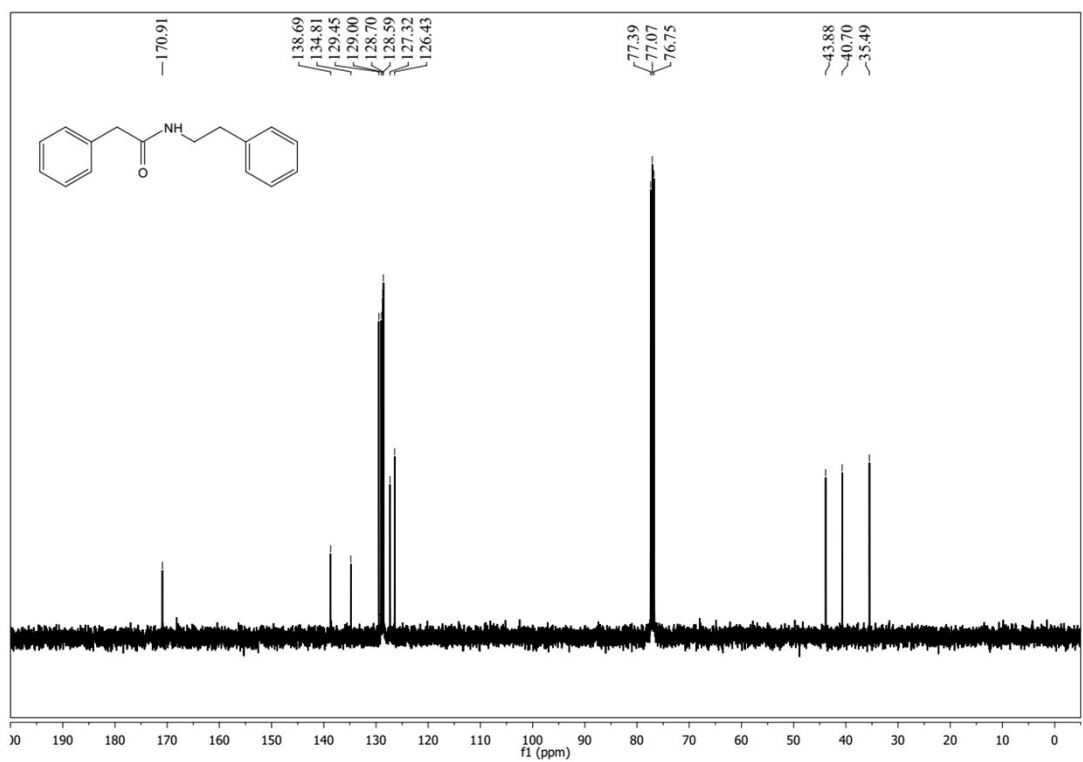

### <sup>1</sup>H NMR Spectra of 3bb

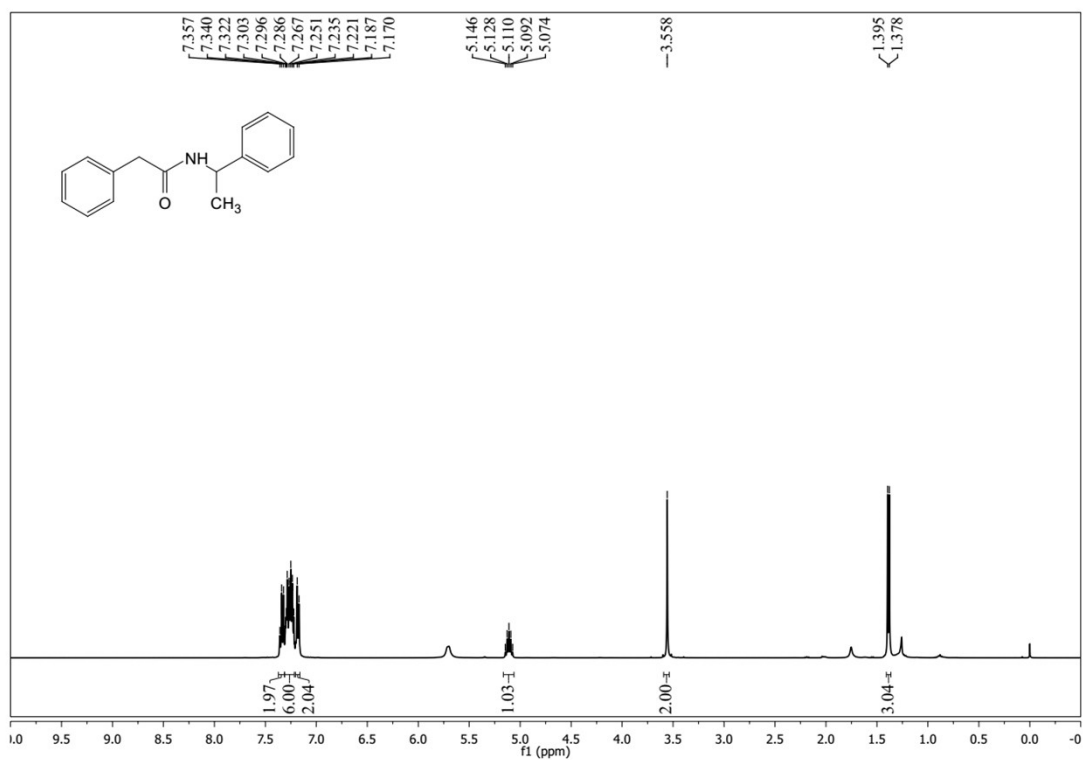

### <sup>13</sup>C NMR Spectra of 3bb

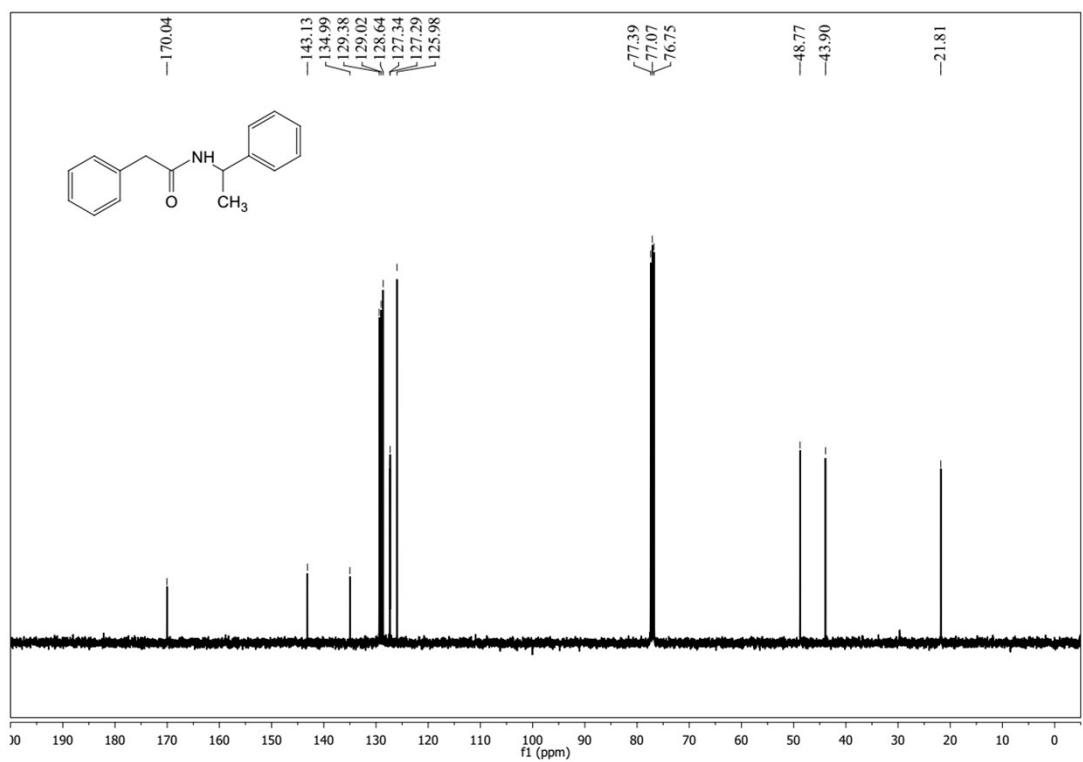

### <sup>1</sup>H NMR Spectra of 3bc

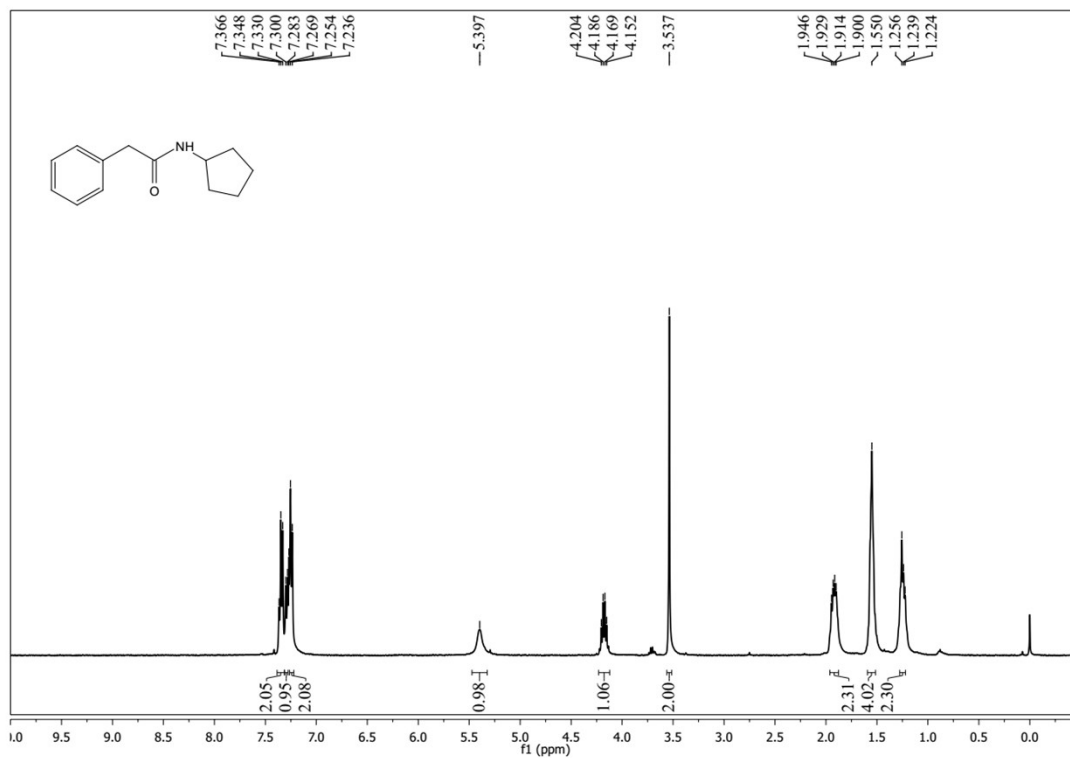

**<sup>13</sup>C NMR Spectra of 3bc**

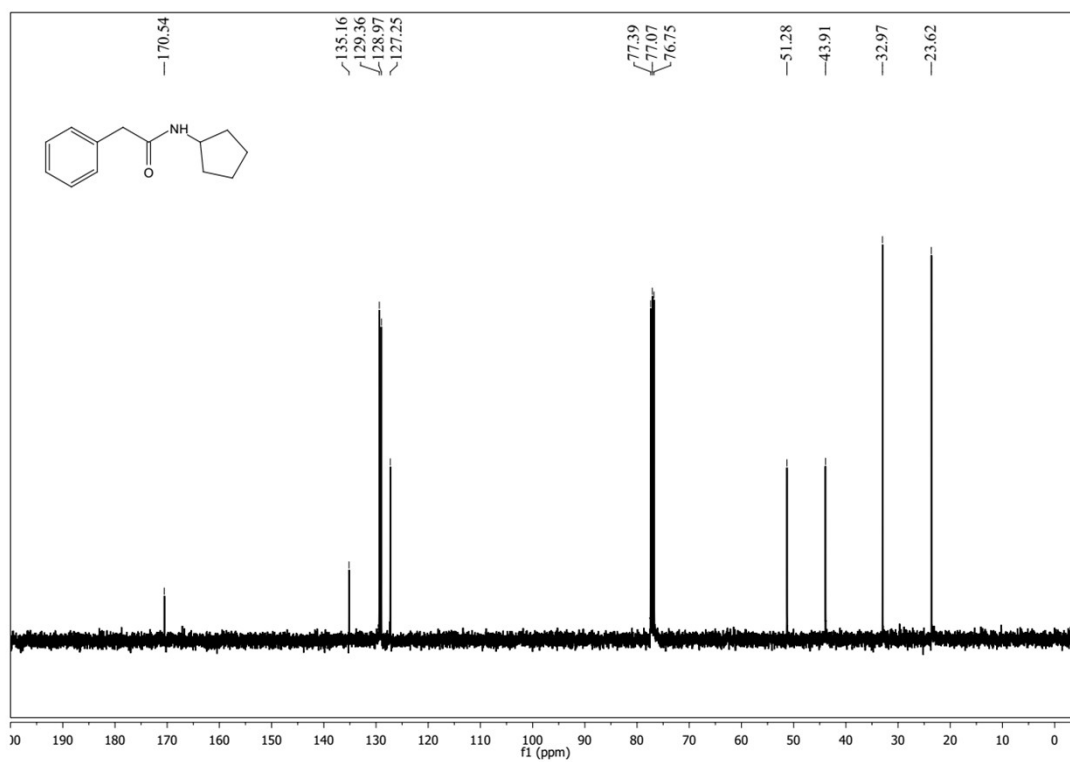

**<sup>1</sup>H NMR Spectra of 3bd**

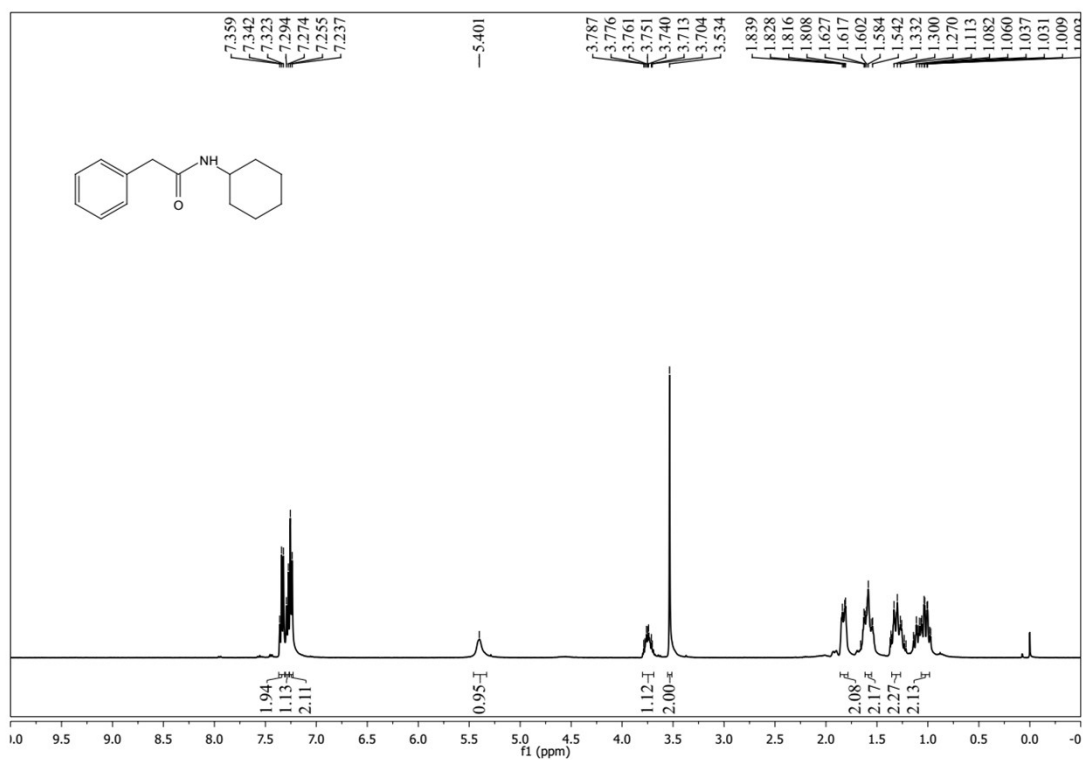

**<sup>13</sup>C NMR Spectra of 3bd**

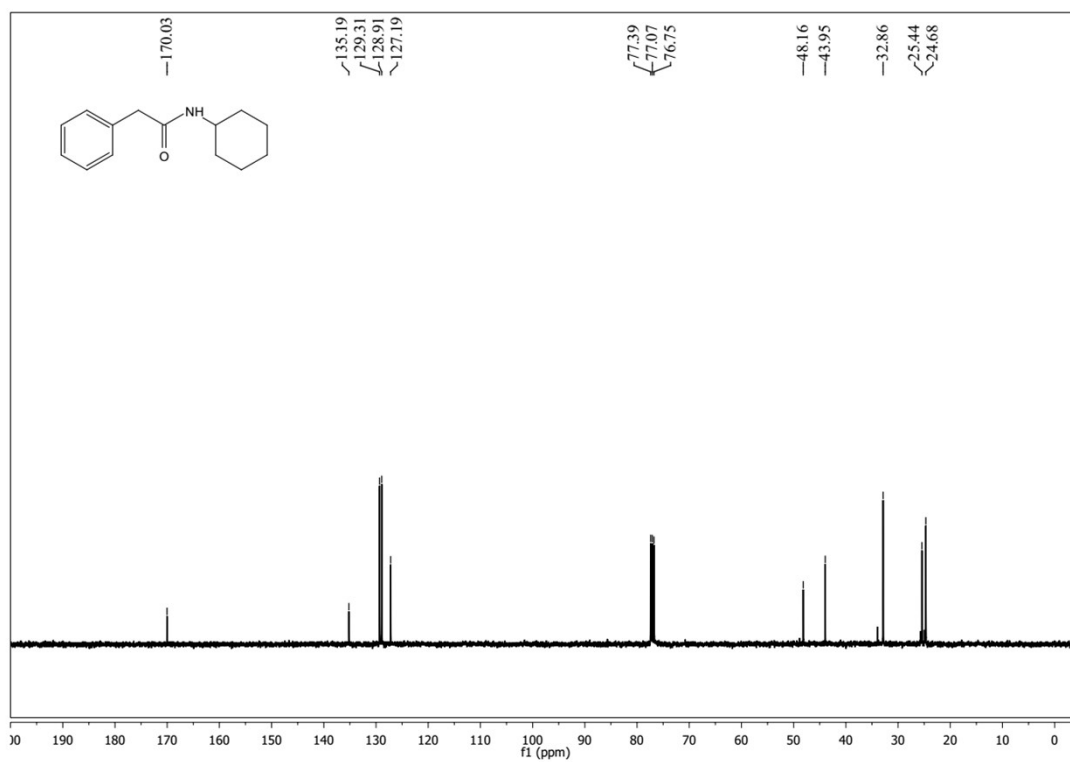

**<sup>1</sup>H NMR Spectra of 3be**

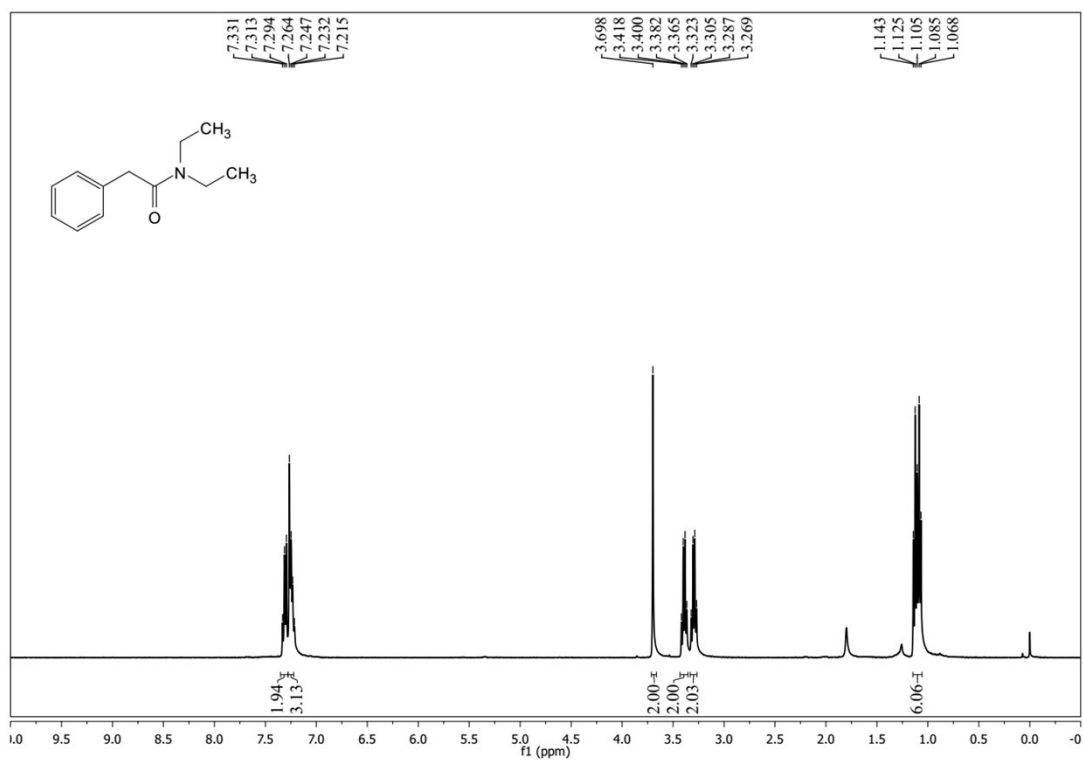

### <sup>13</sup>C NMR Spectra of 3be

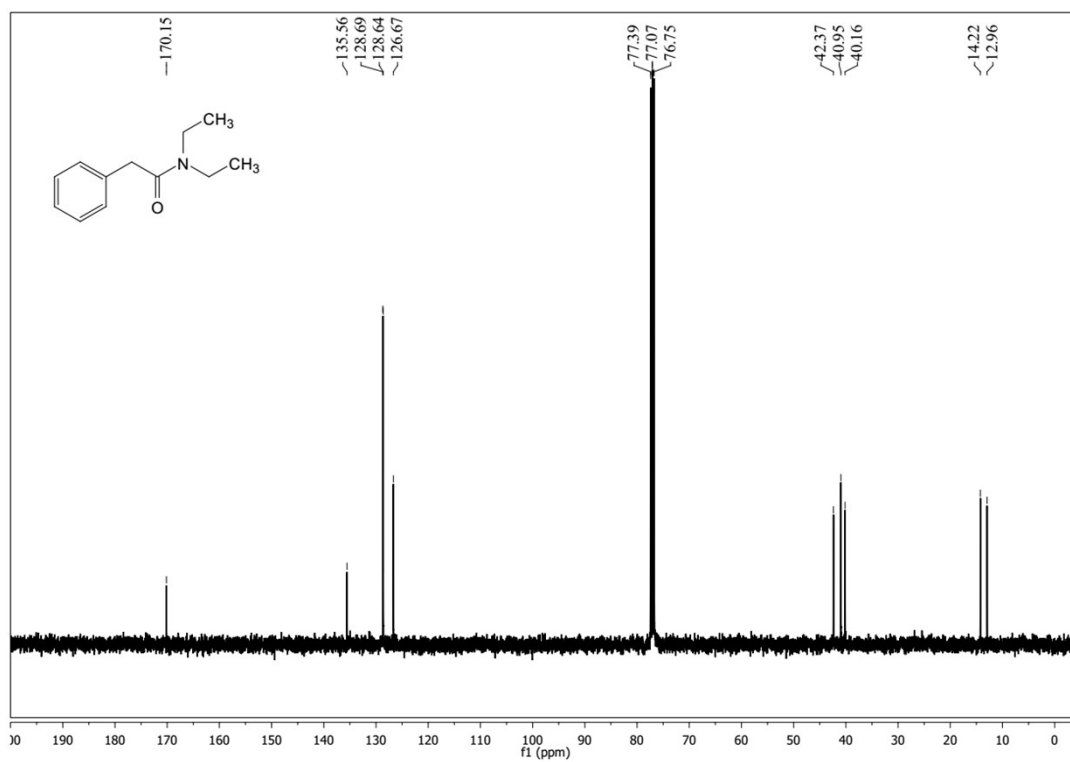

### <sup>1</sup>H NMR Spectra of 3bf

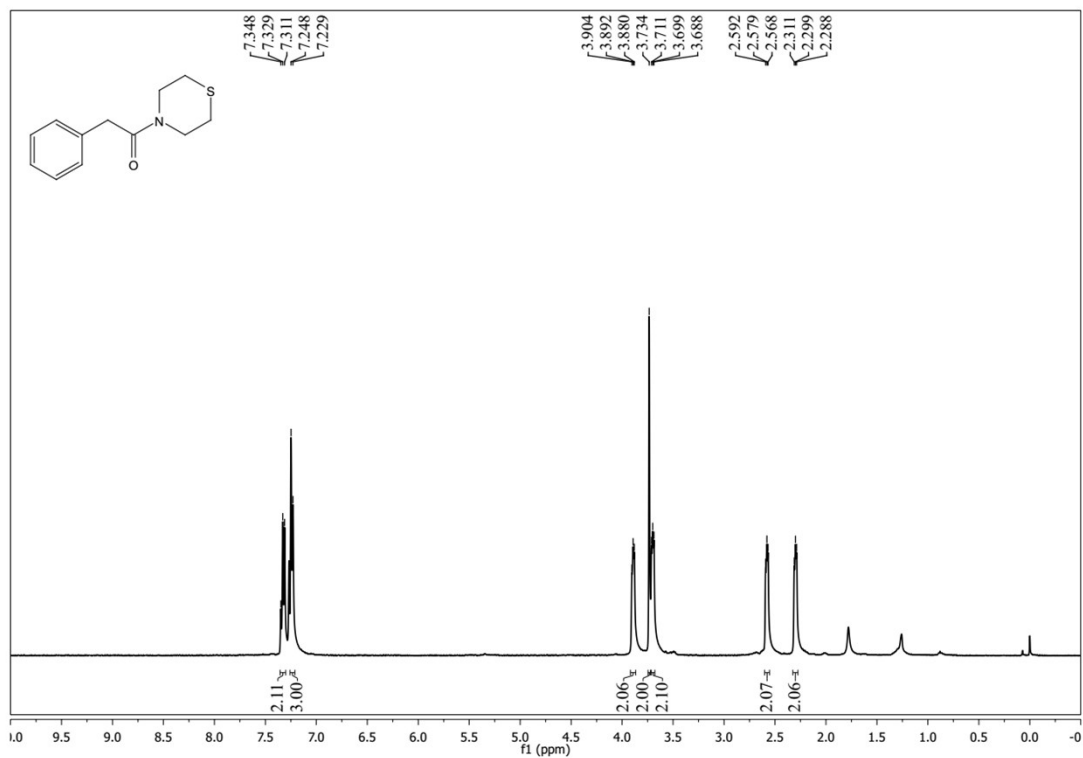

### <sup>13</sup>C NMR Spectra of 3bf

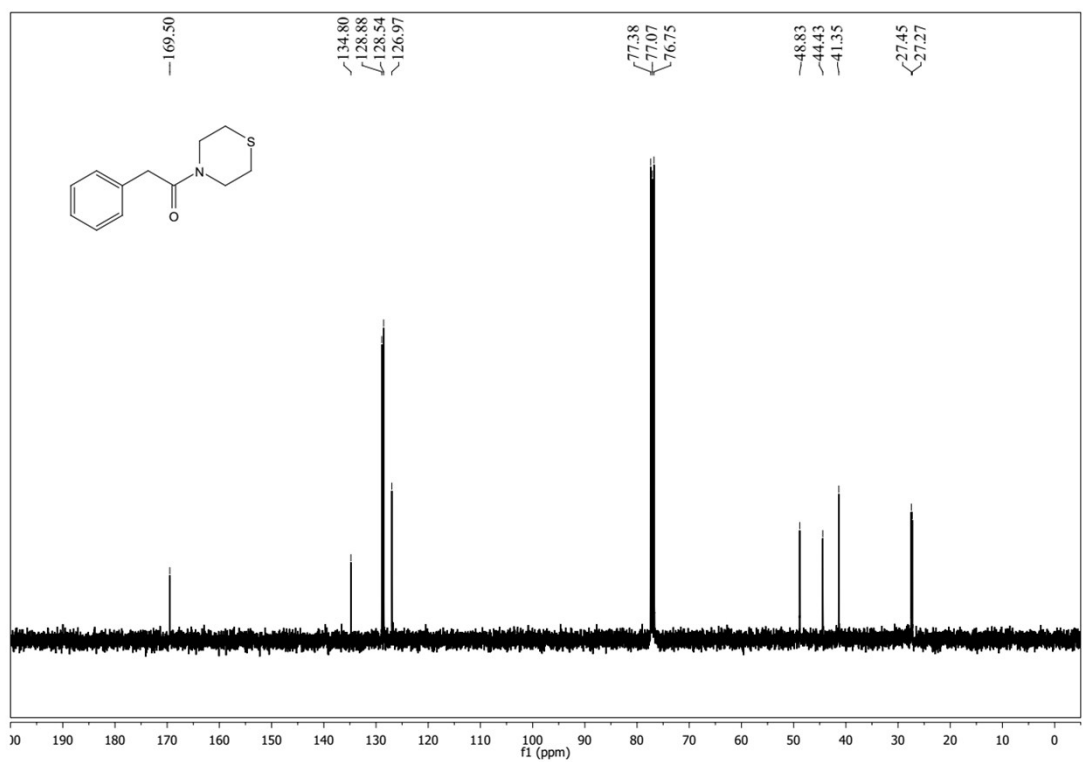

### <sup>1</sup>H NMR Spectra of 3bg

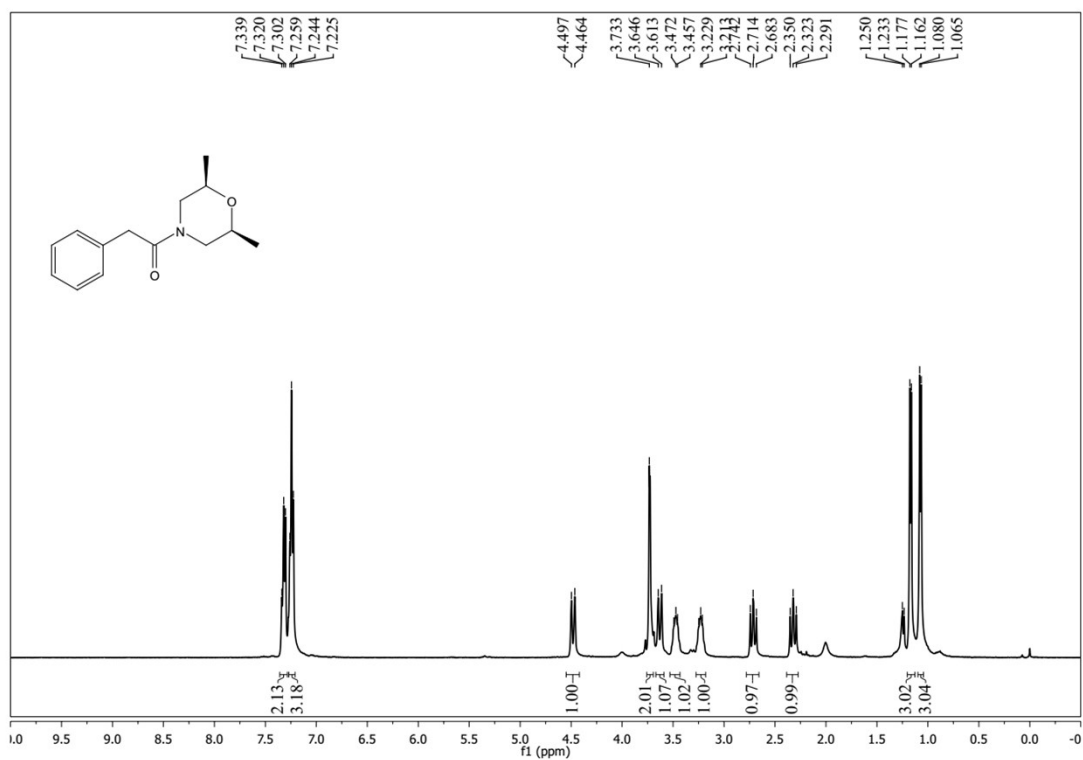

### <sup>13</sup>C NMR Spectra of 3bg

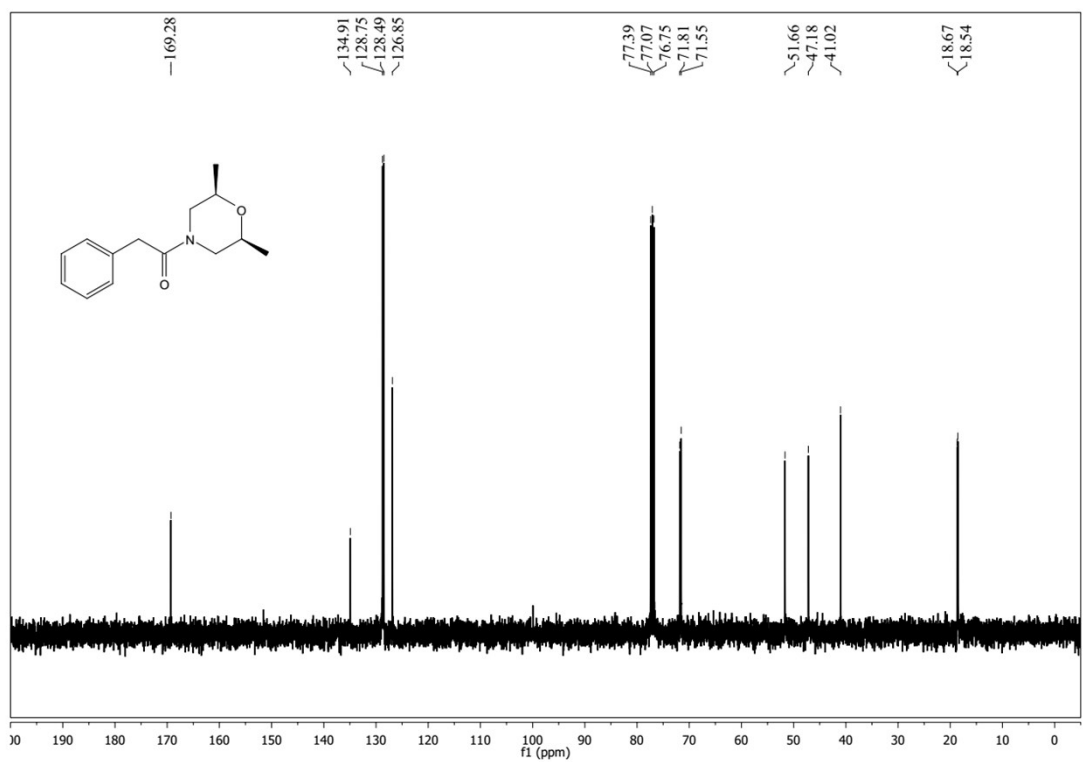

### <sup>1</sup>H NMR Spectra of 3bh

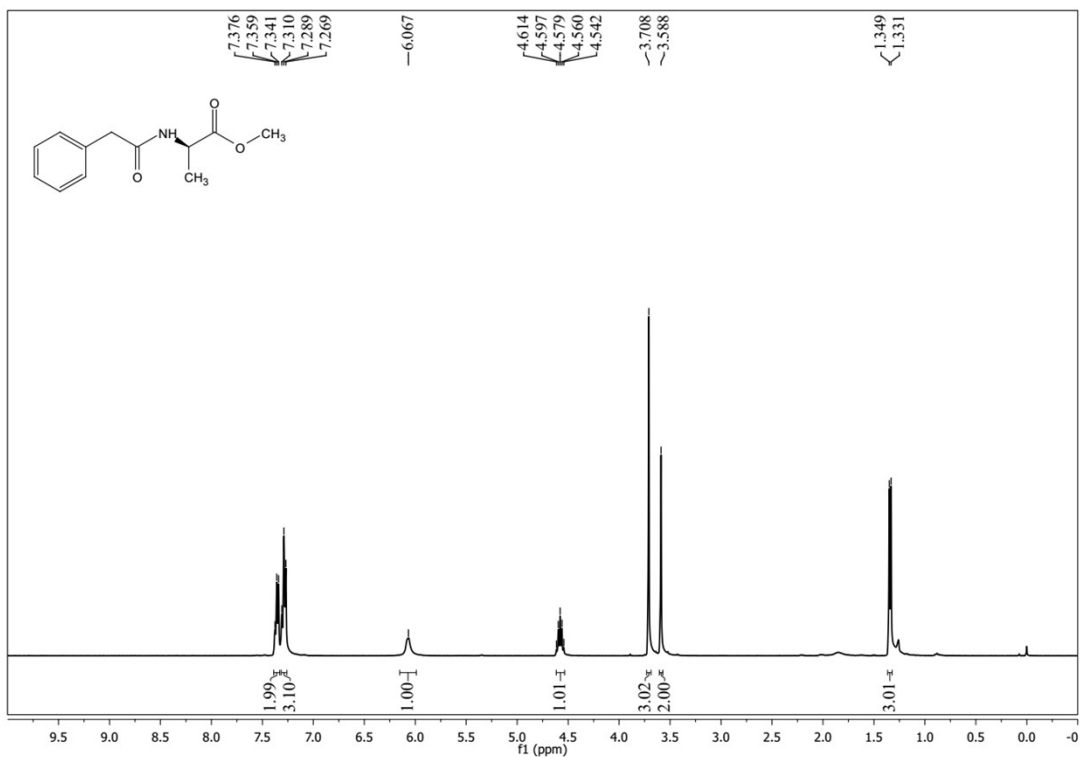

### <sup>13</sup>C NMR Spectra of 3bh

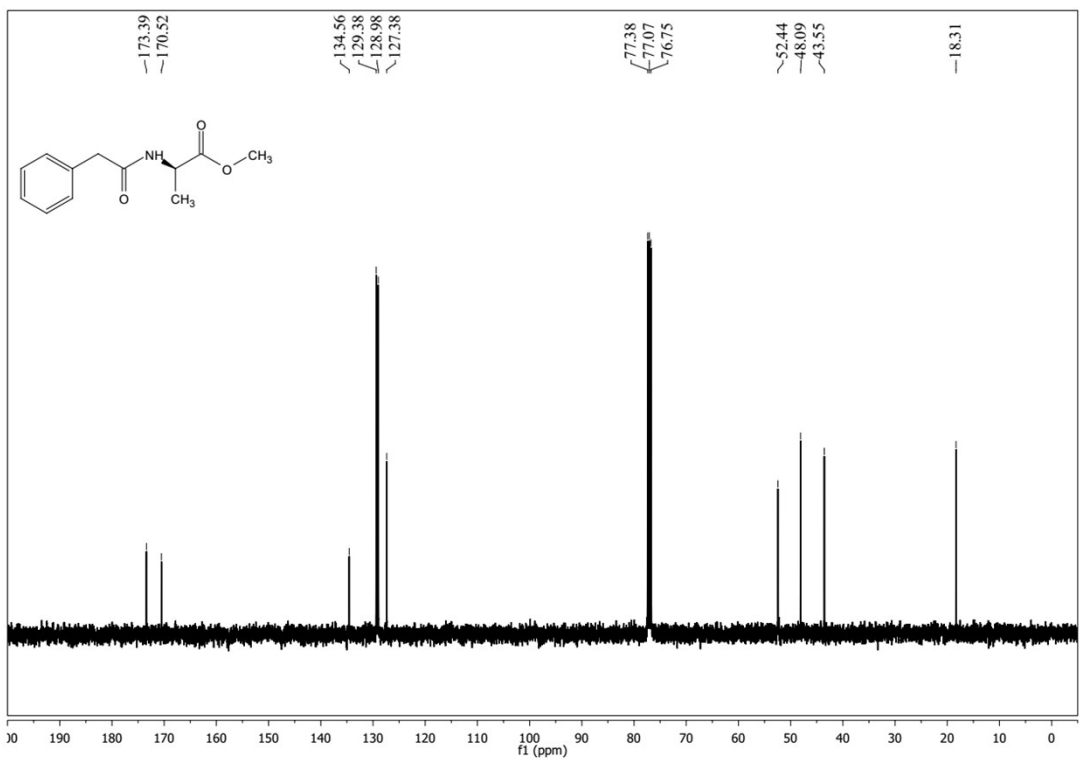

### <sup>1</sup>H NMR Spectra of 3bi



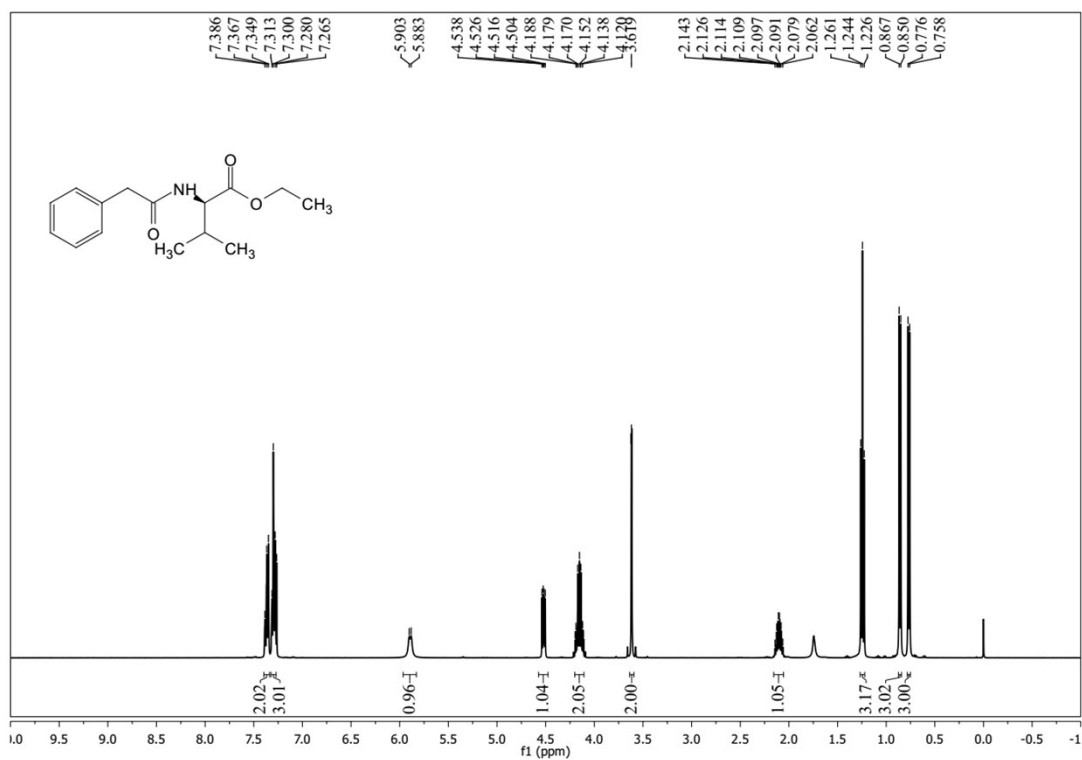

### <sup>13</sup>C NMR Spectra of 3bi

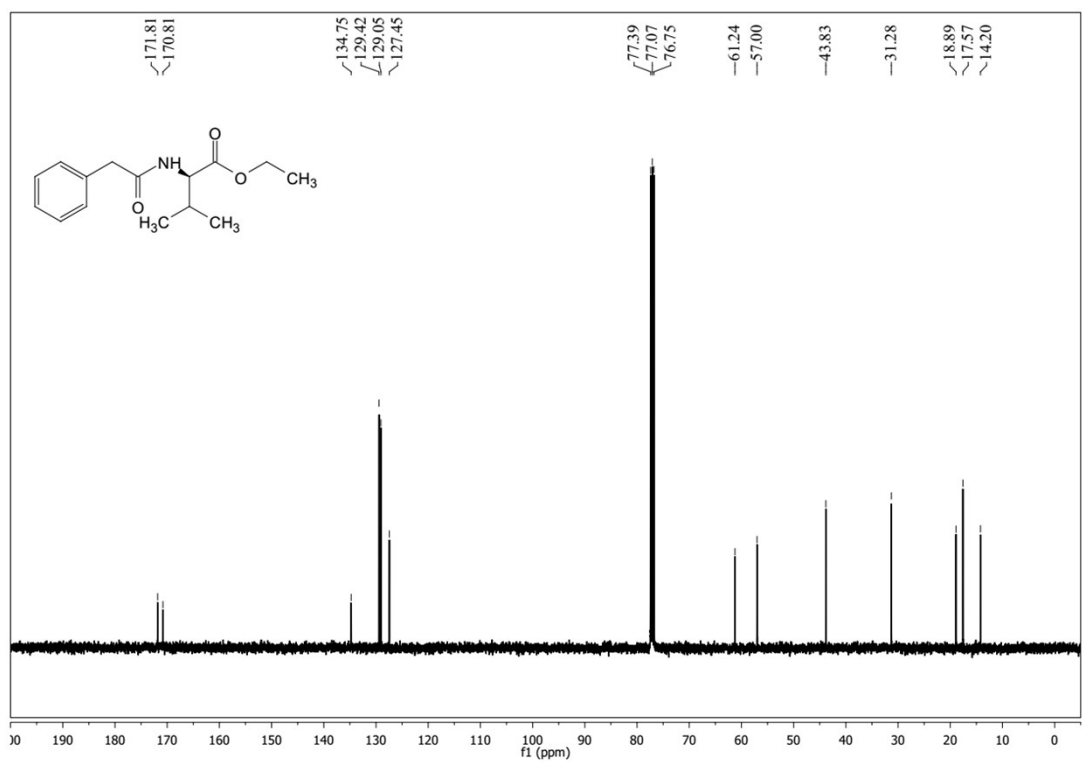

### <sup>1</sup>H NMR Spectra of 3bj

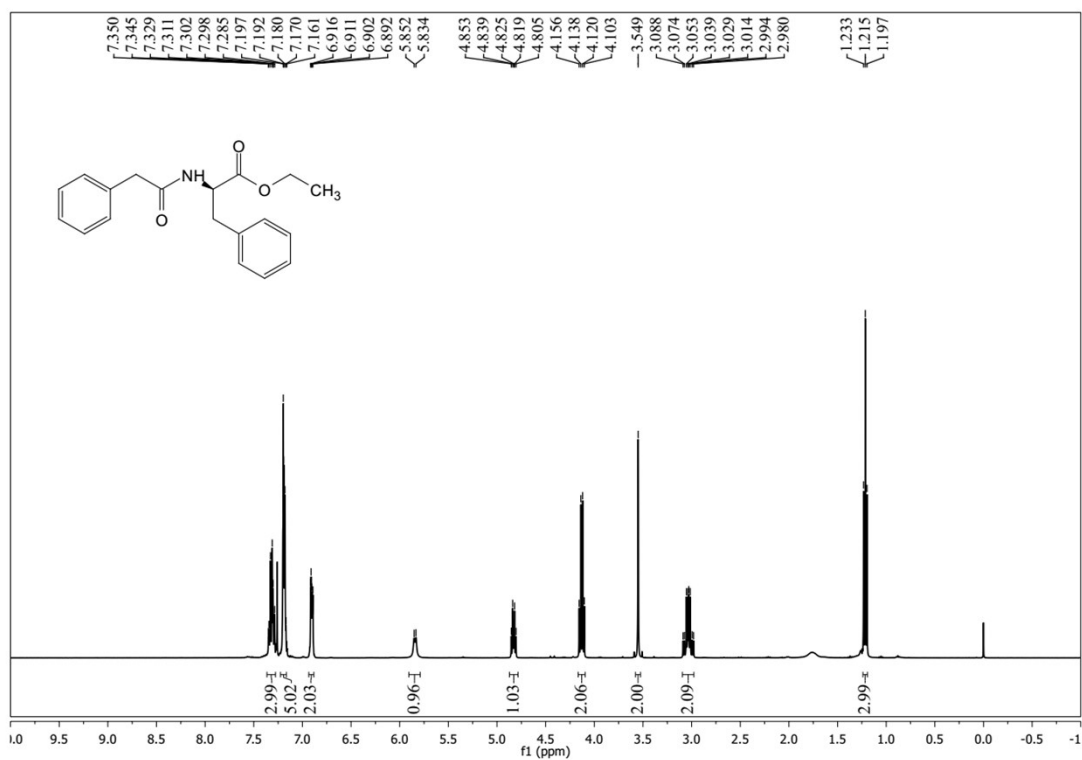

### <sup>13</sup>C NMR Spectra of 3bj

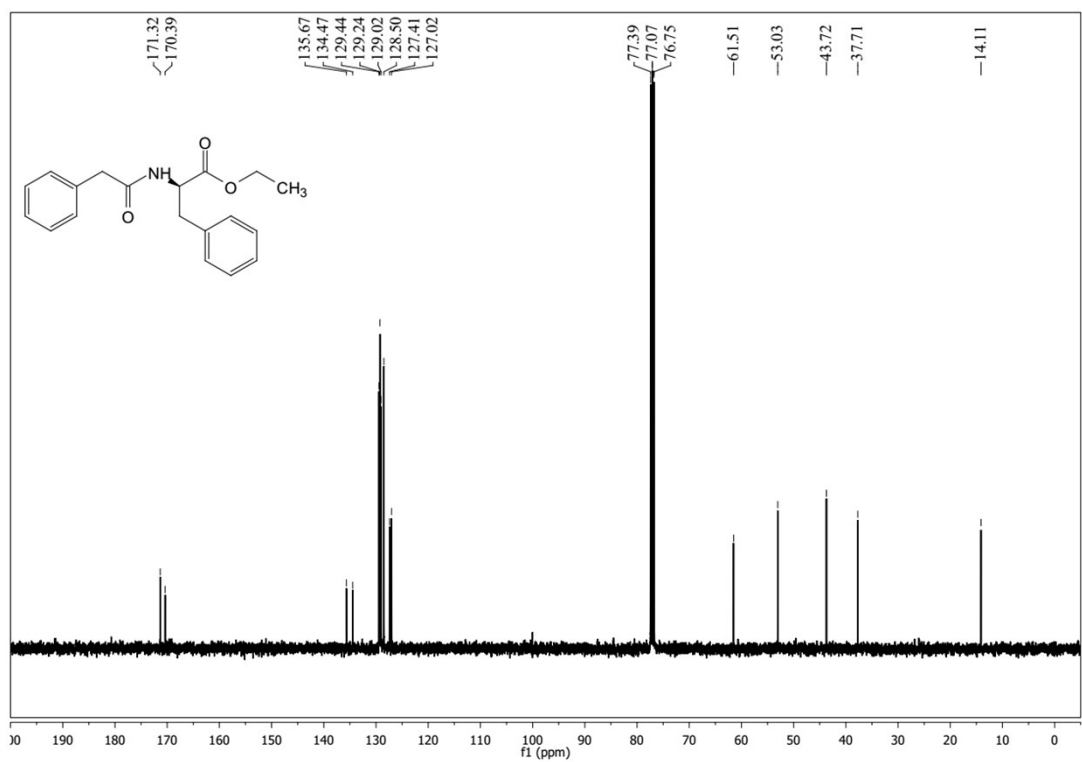

### <sup>1</sup>H NMR Spectra of 5aa

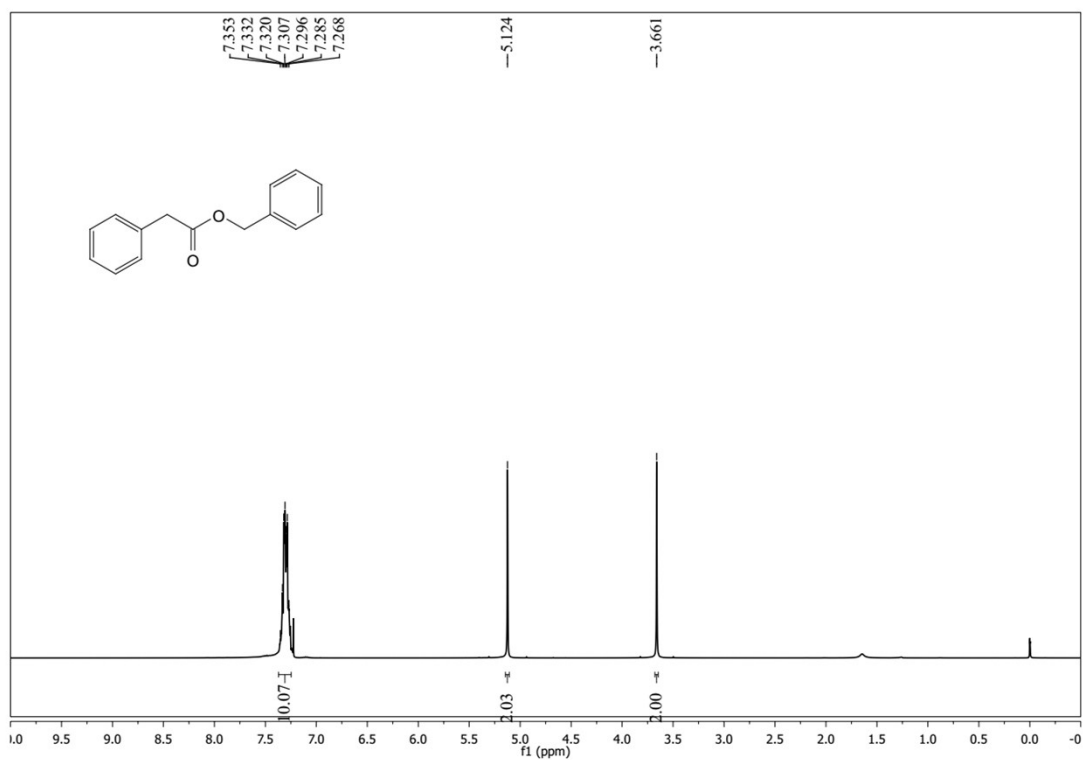

### <sup>13</sup>C NMR Spectra of 5aa

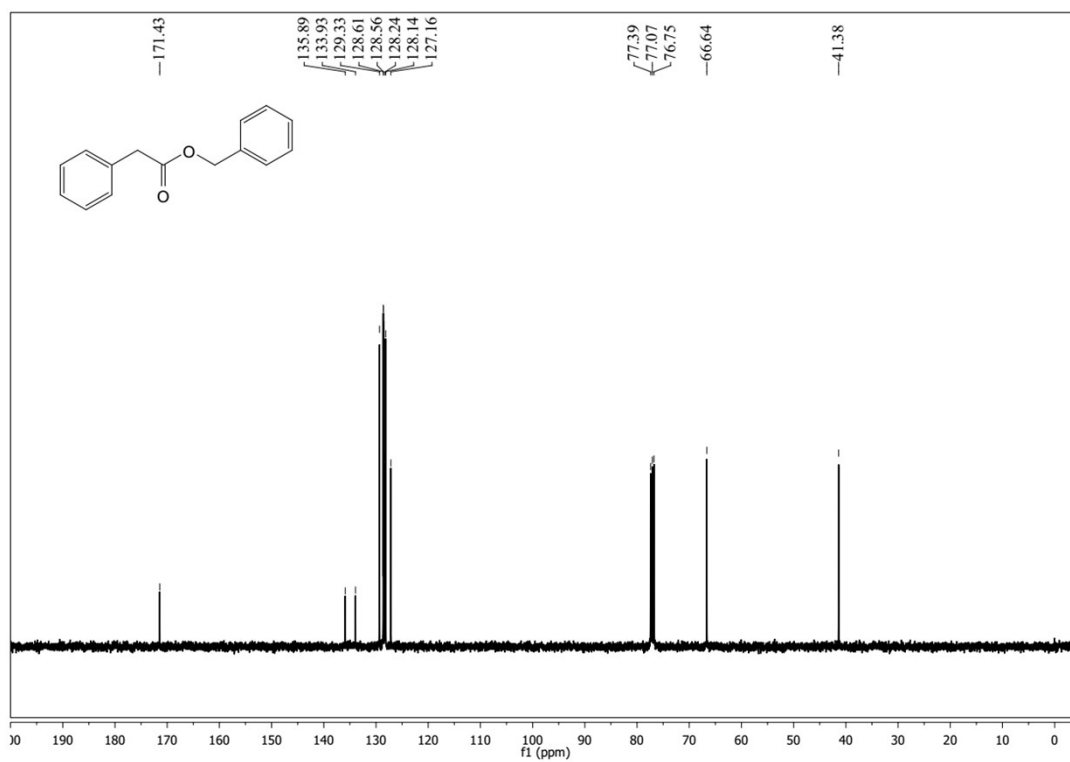

### <sup>1</sup>H NMR Spectra of 5ab

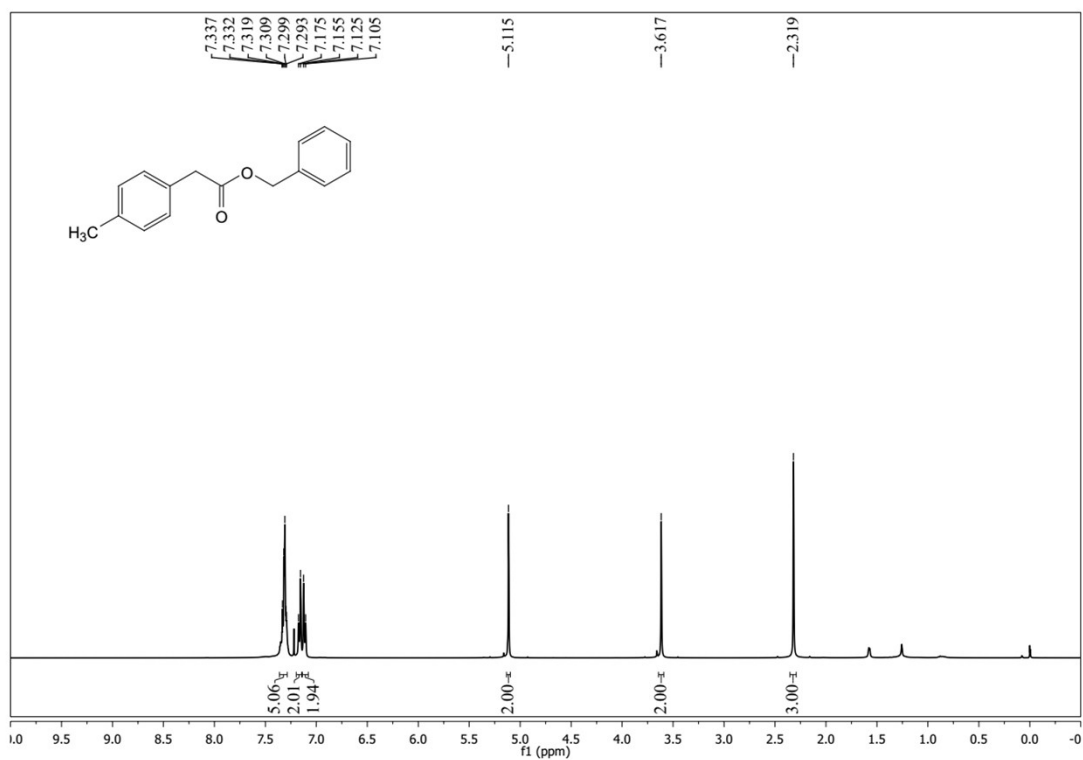

### <sup>13</sup>C NMR Spectra of 5ab

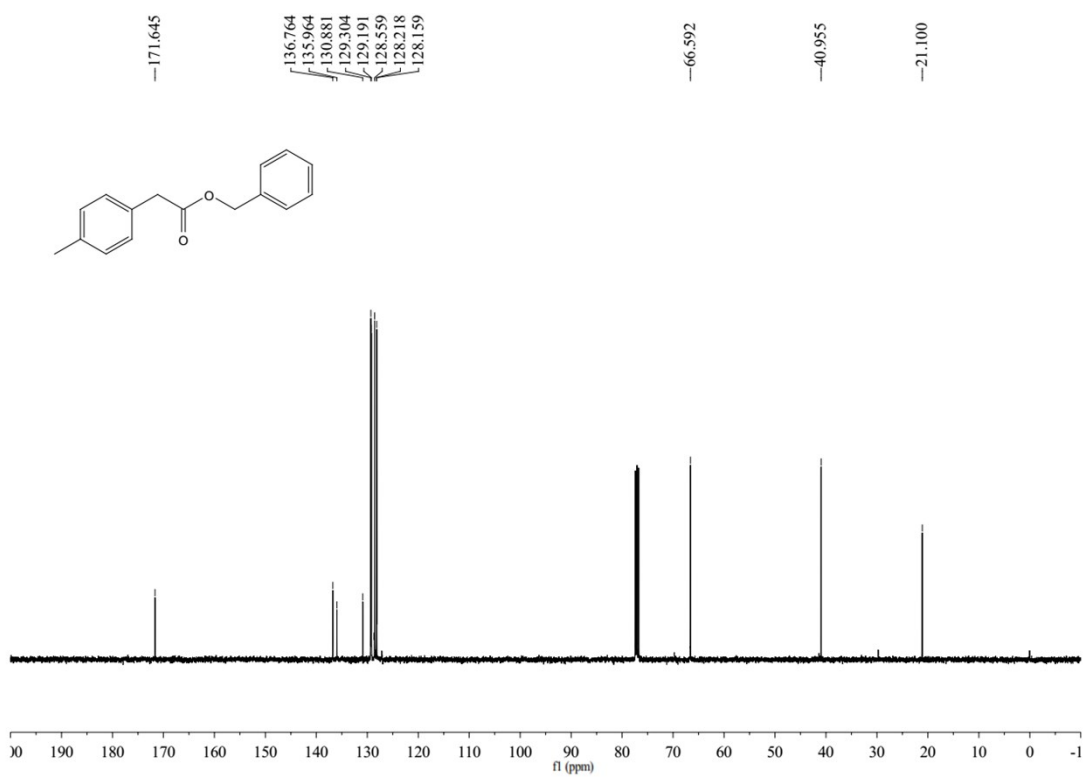

### <sup>1</sup>H NMR Spectra of 5ac

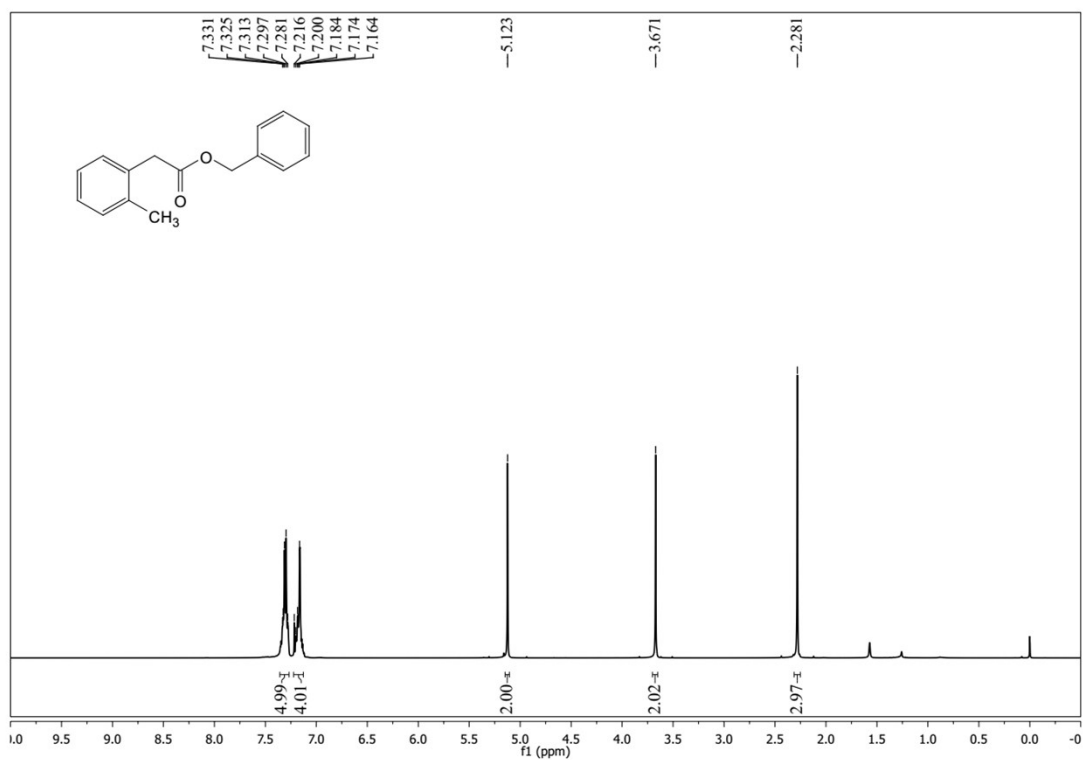

### <sup>13</sup>C NMR Spectra of 5ac

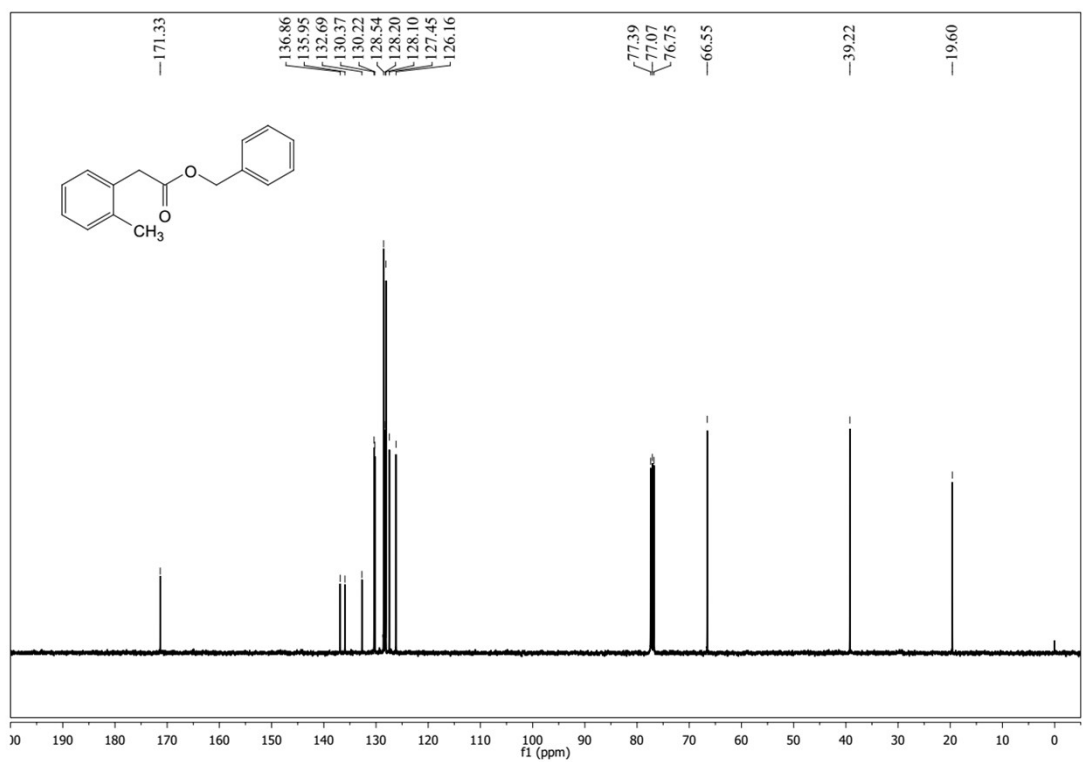

### <sup>1</sup>H NMR Spectra of 5ad

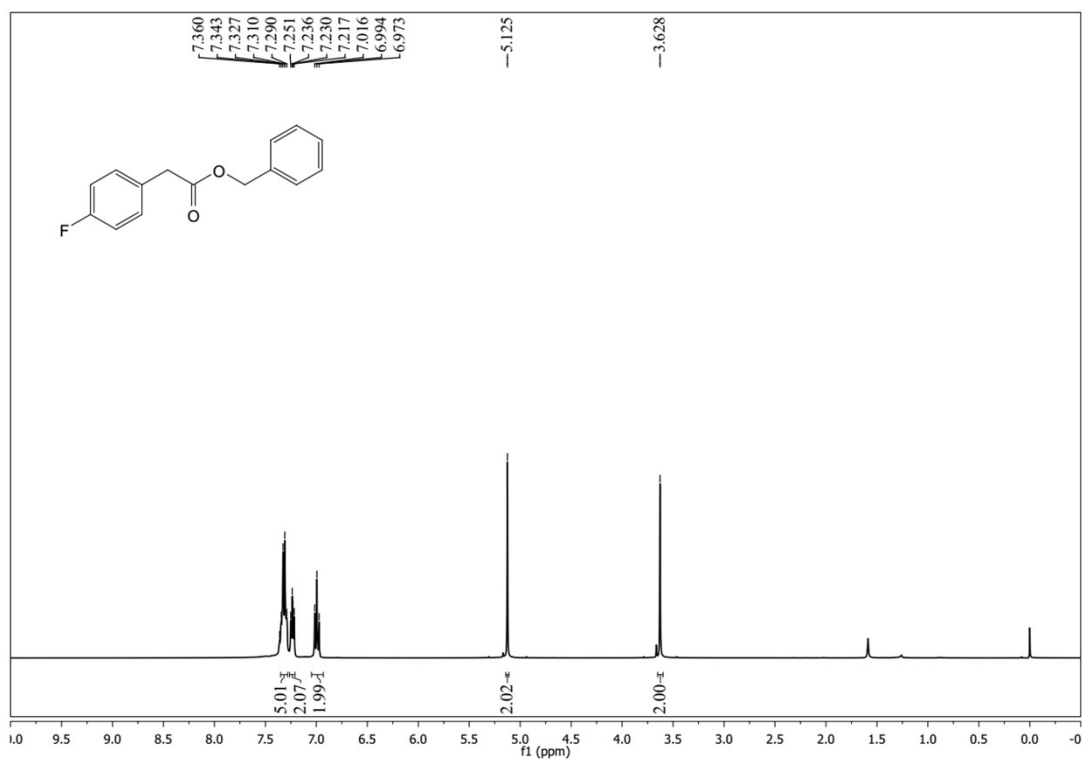

### <sup>13</sup>C NMR Spectra of 5ad

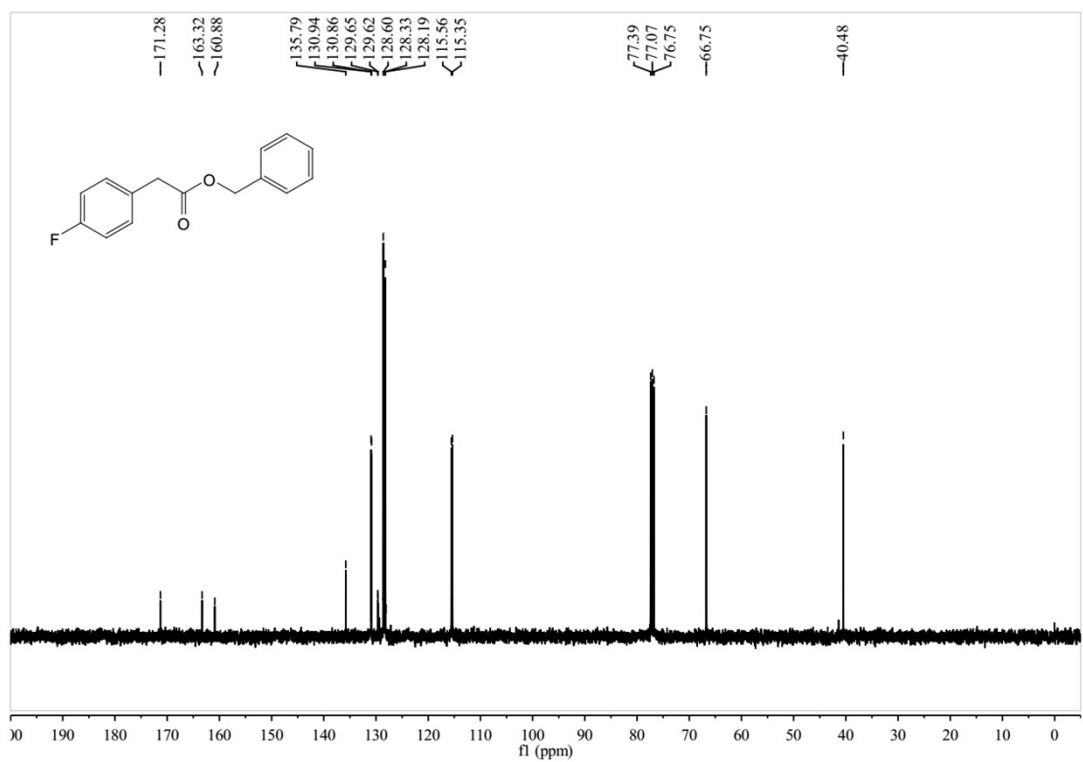

### <sup>1</sup>H NMR Spectra of 5ae

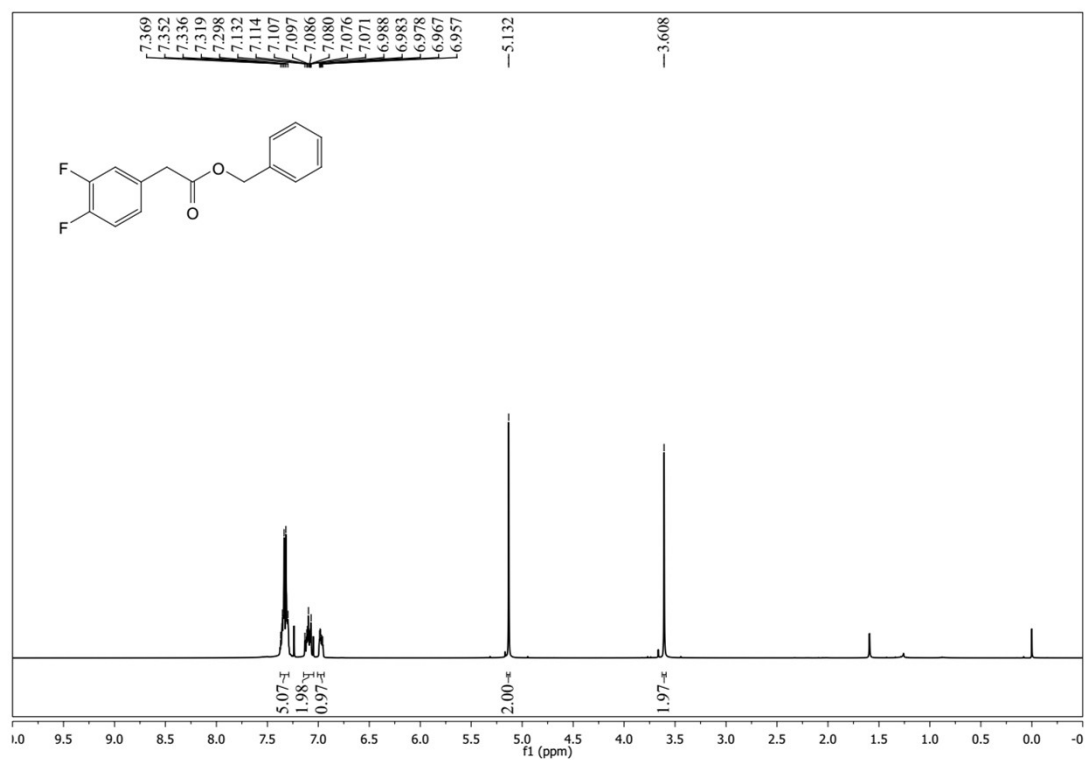

### <sup>13</sup>C NMR Spectra of 5ae

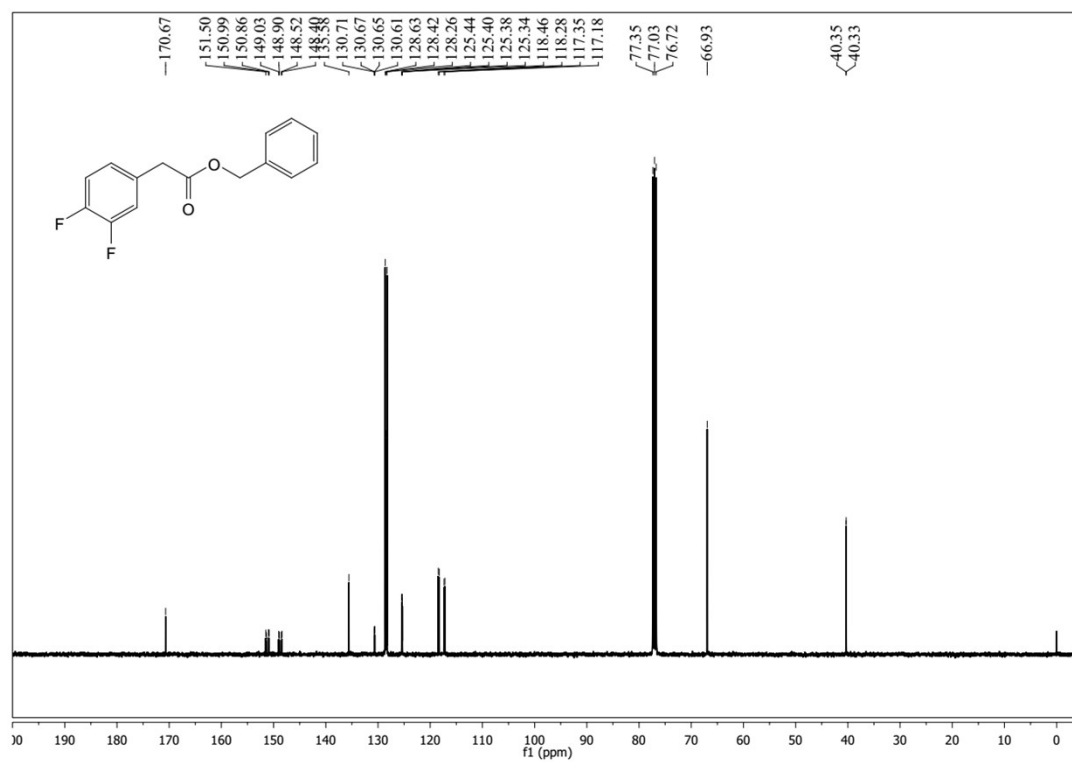

### <sup>1</sup>H NMR Spectra of 5af

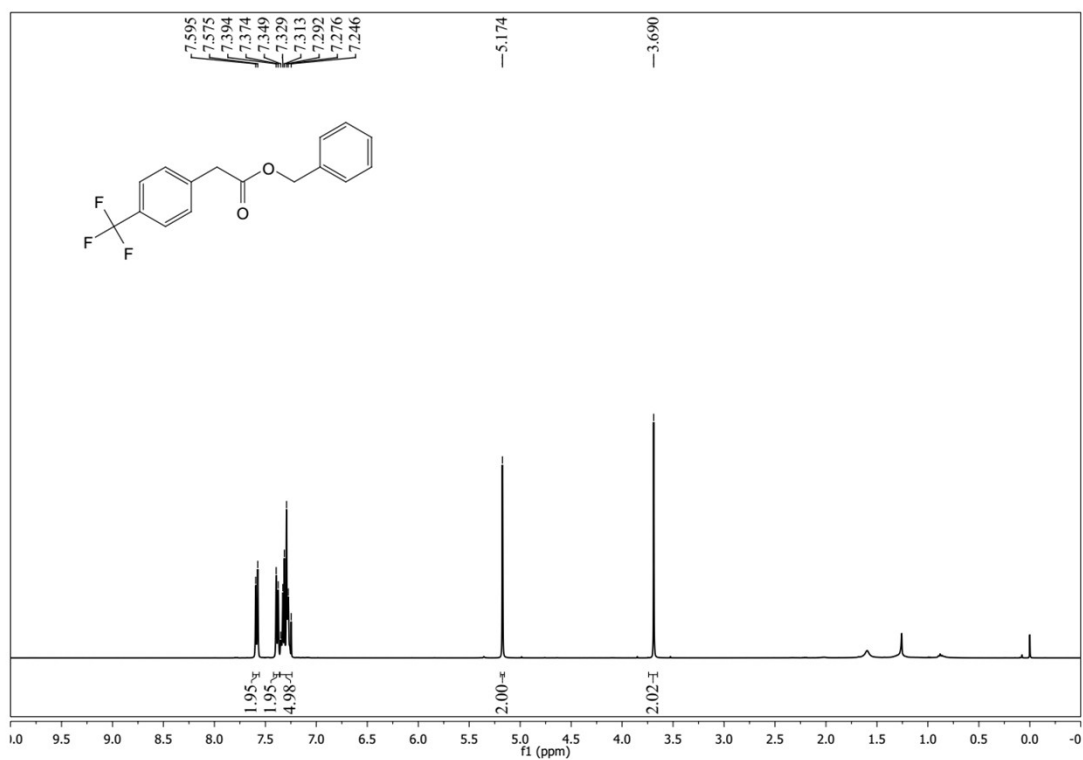

### <sup>13</sup>C NMR Spectra of 5af

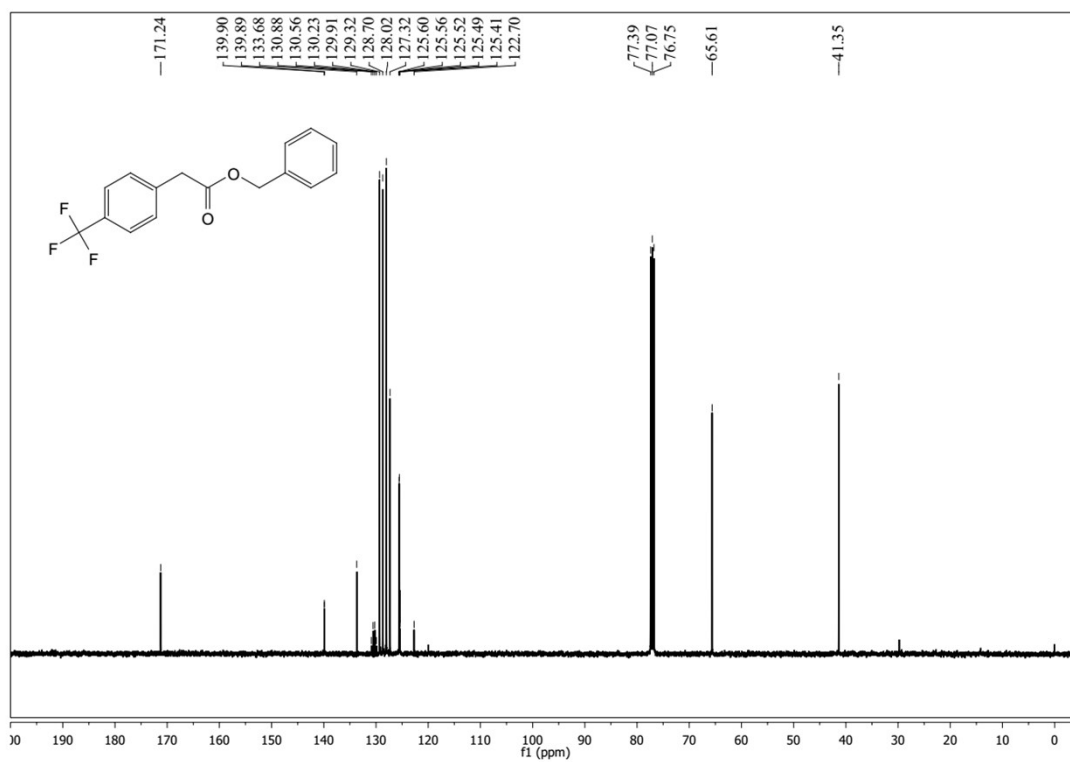

### <sup>1</sup>H NMR Spectra of 5ag



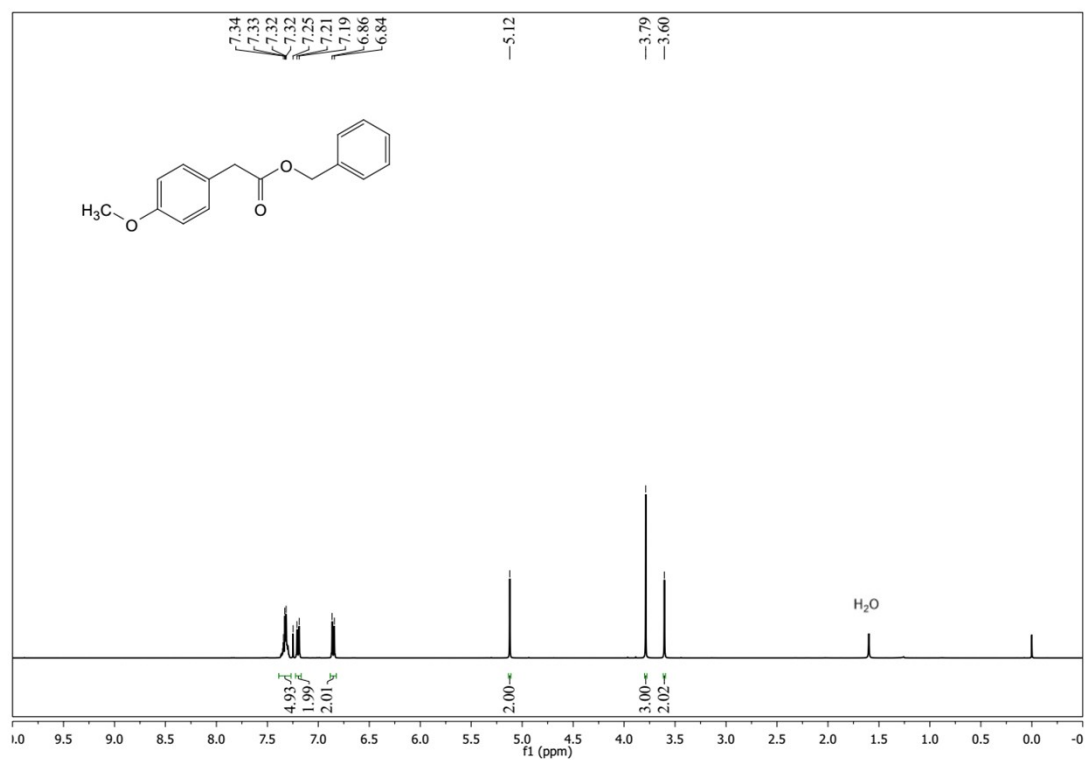

**<sup>13</sup>C NMR Spectra of 5ag**

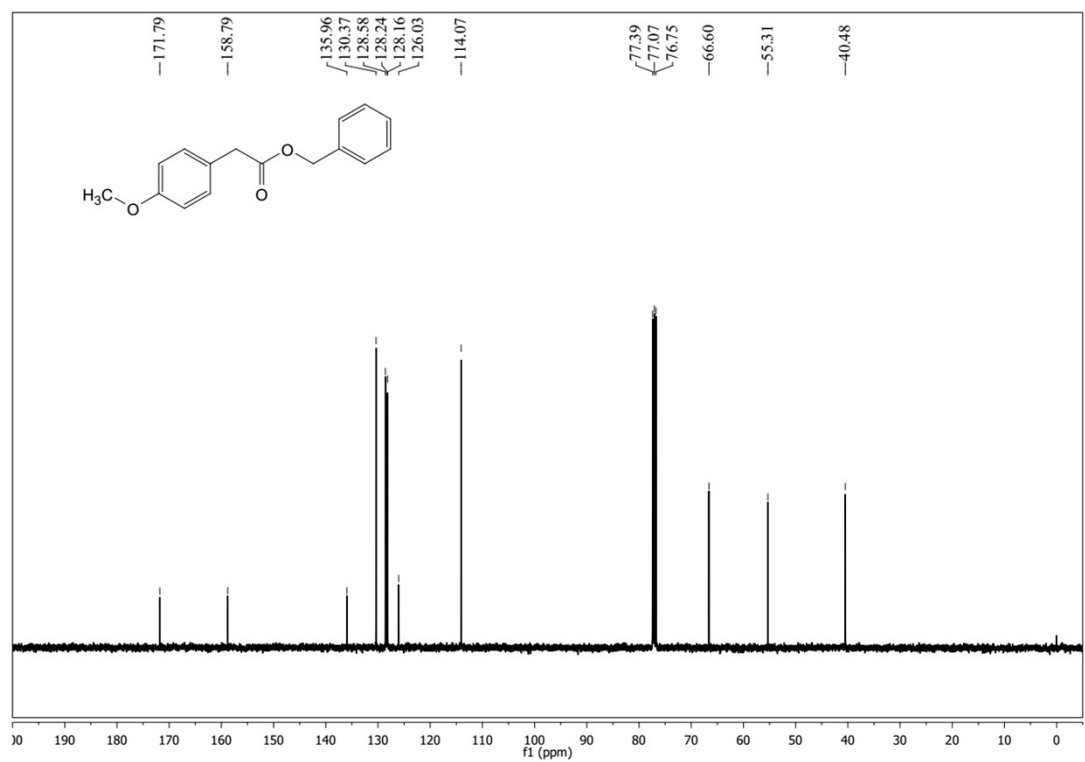

**<sup>1</sup>H NMR Spectra of 5ah**

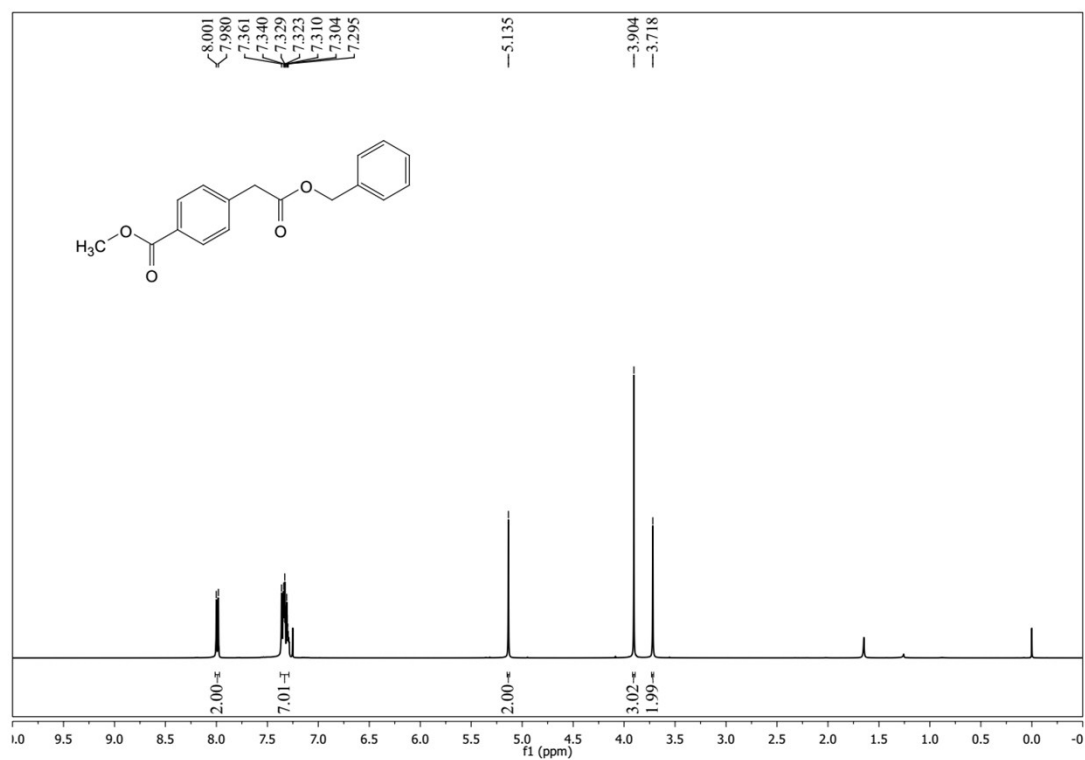

### <sup>13</sup>C NMR Spectra of 5ah

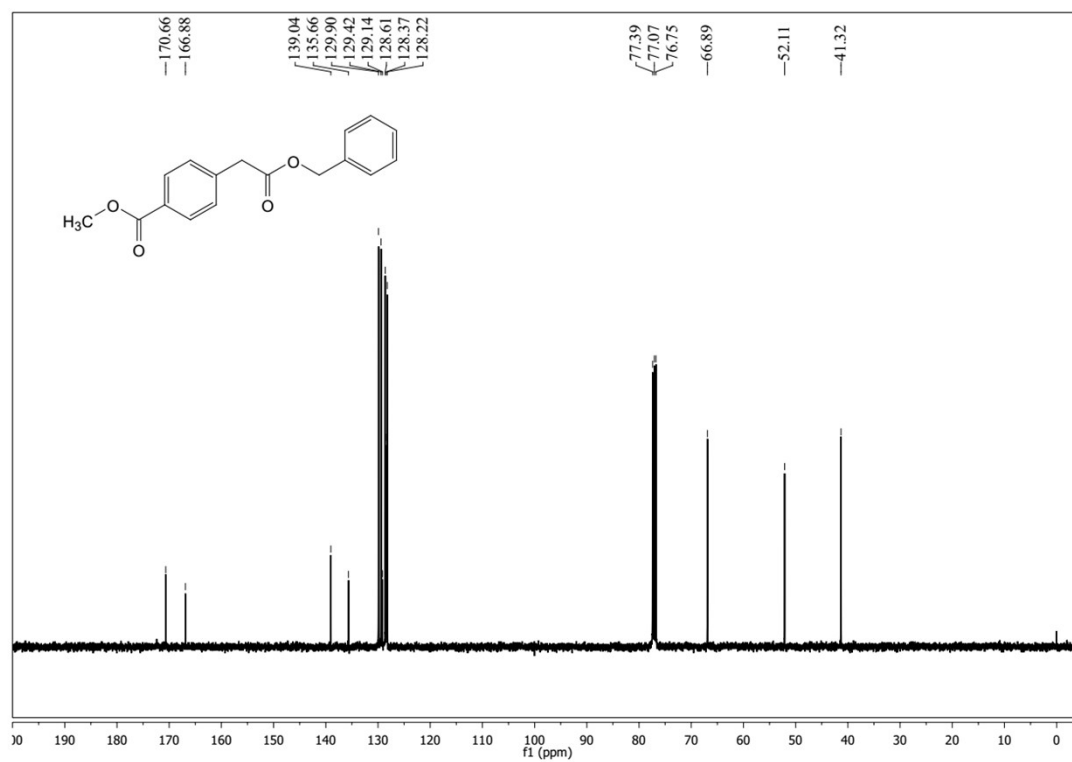

### <sup>1</sup>H NMR Spectra of 5ai

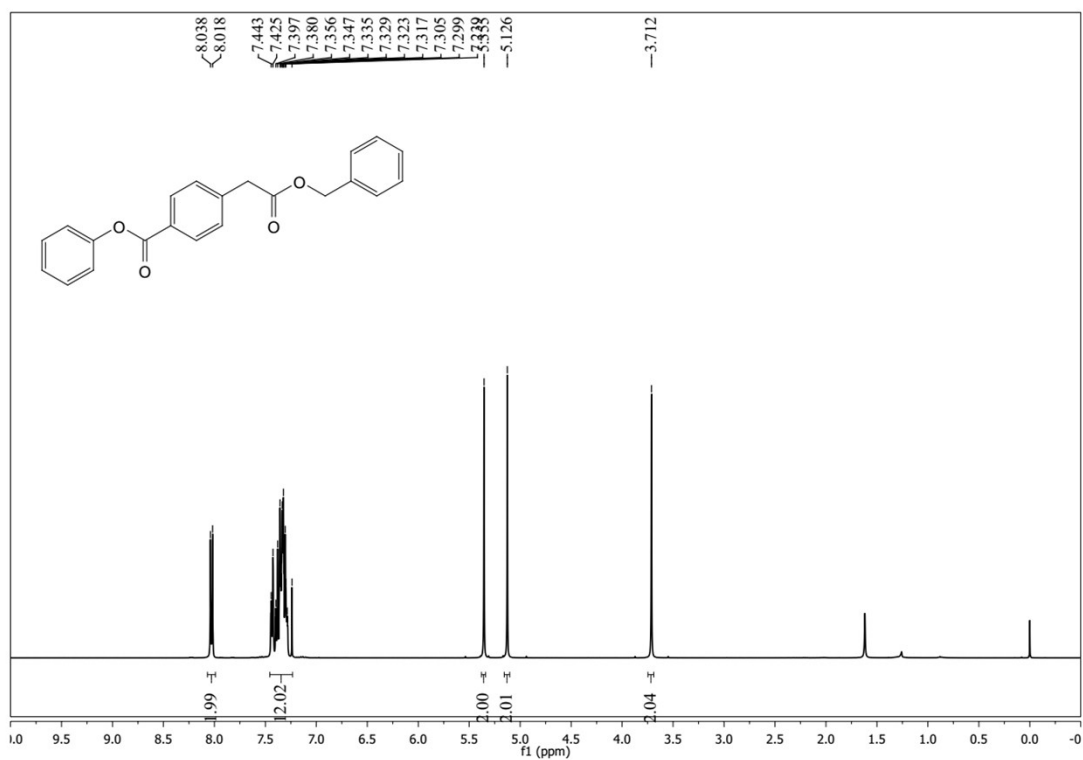

### <sup>13</sup>C NMR Spectra of 5ai

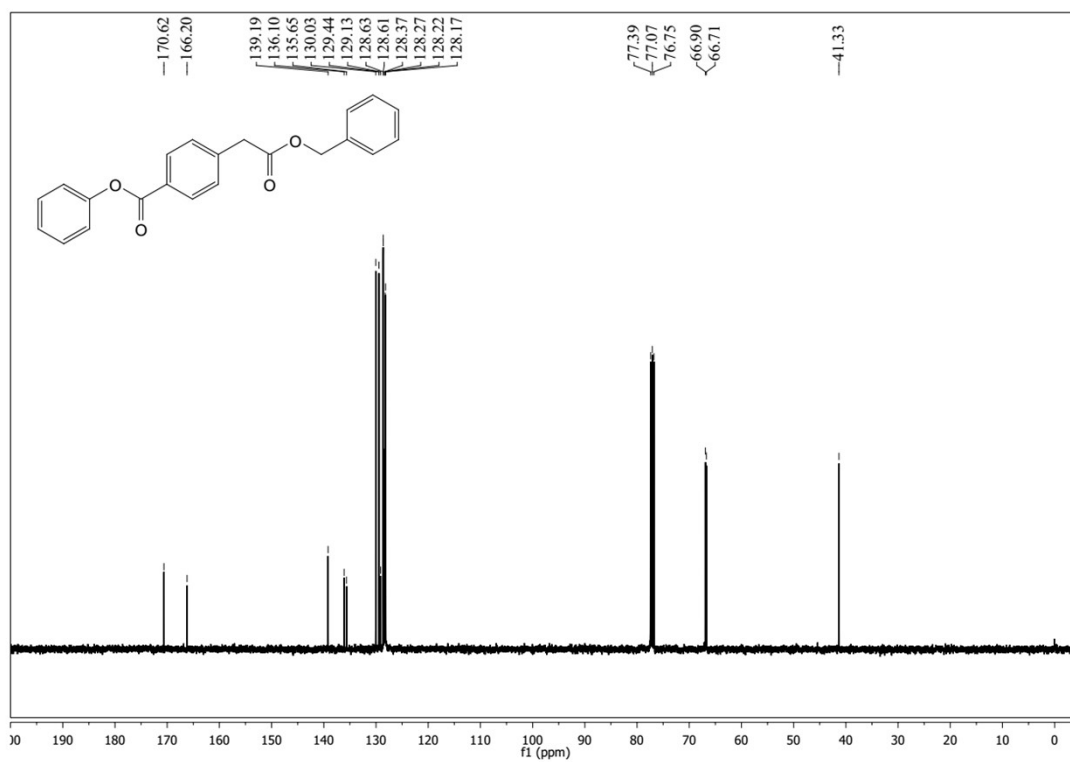

### <sup>1</sup>H NMR Spectra of 5aj

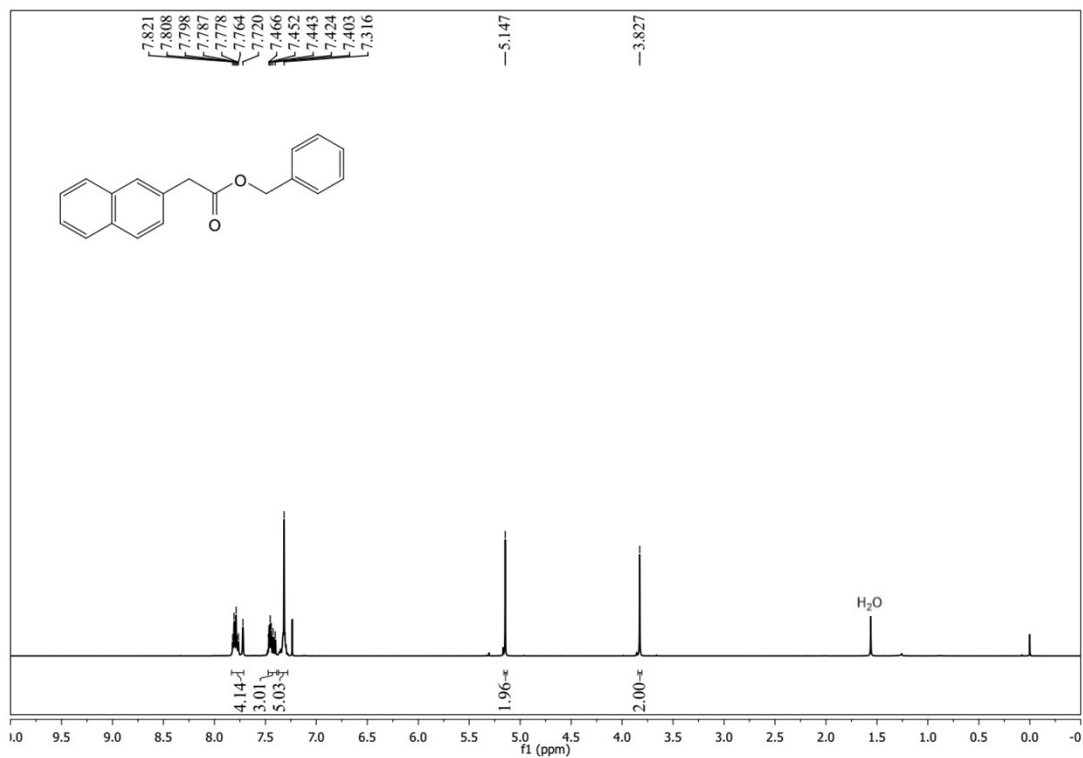

**<sup>13</sup>C NMR Spectra of 5aj**

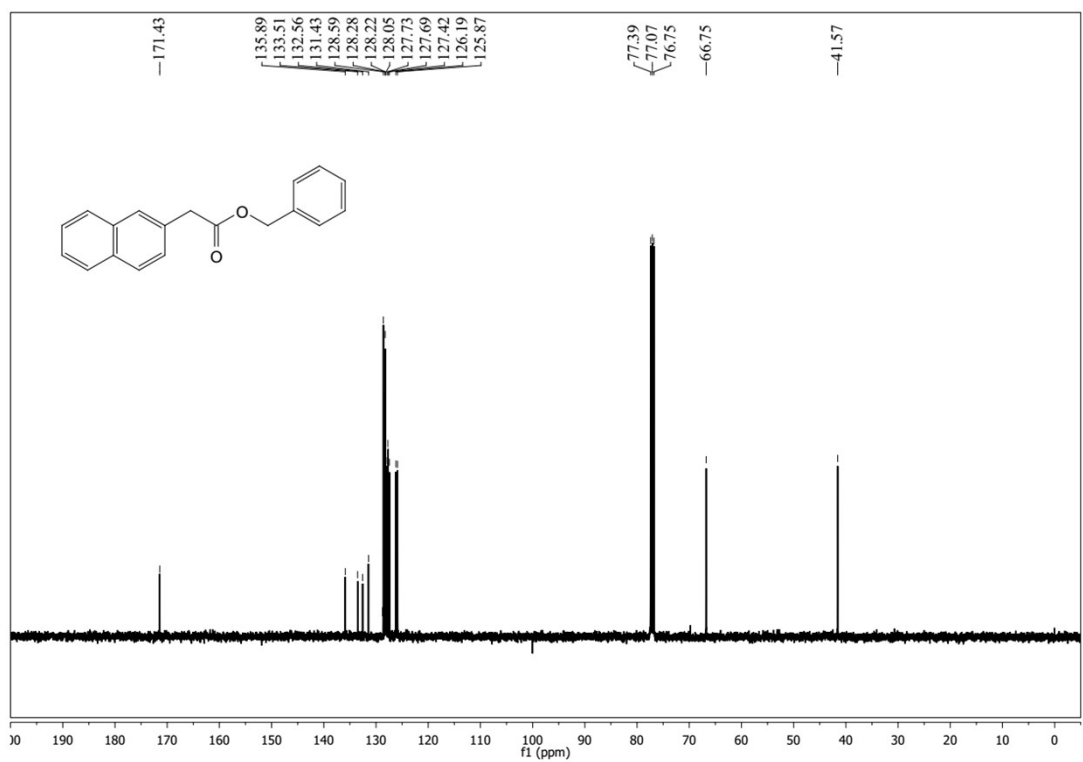

**<sup>1</sup>H NMR Spectra of 5ak**

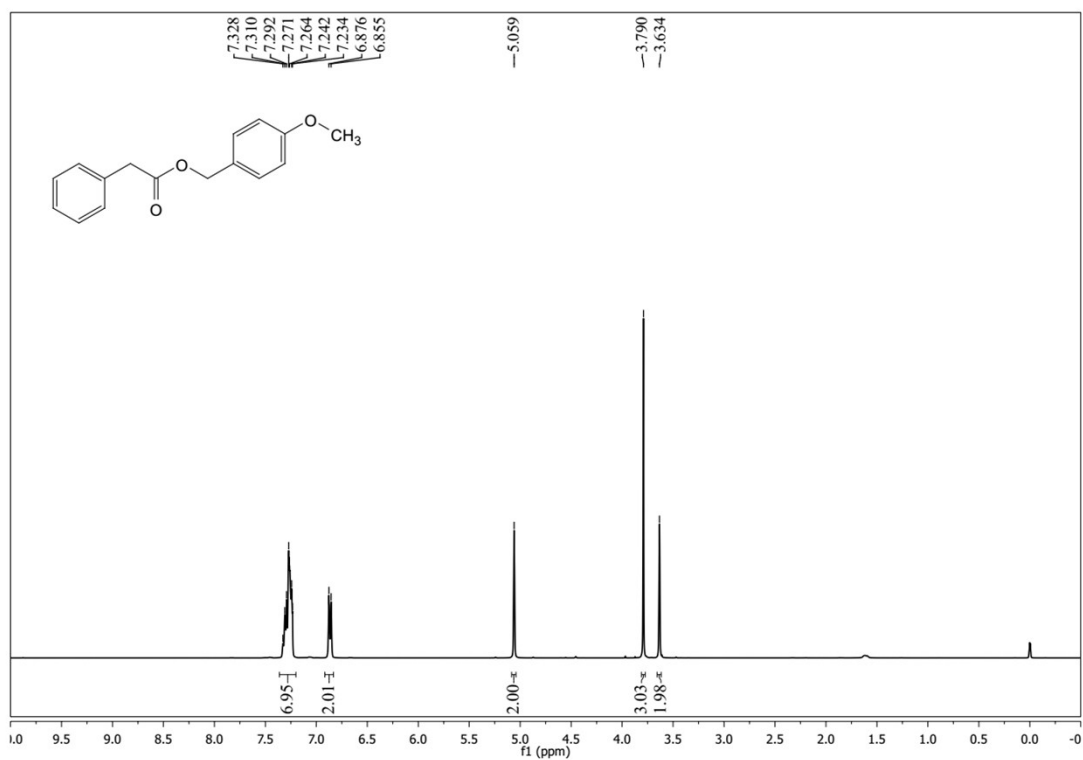

### <sup>13</sup>C NMR Spectra of 5ak

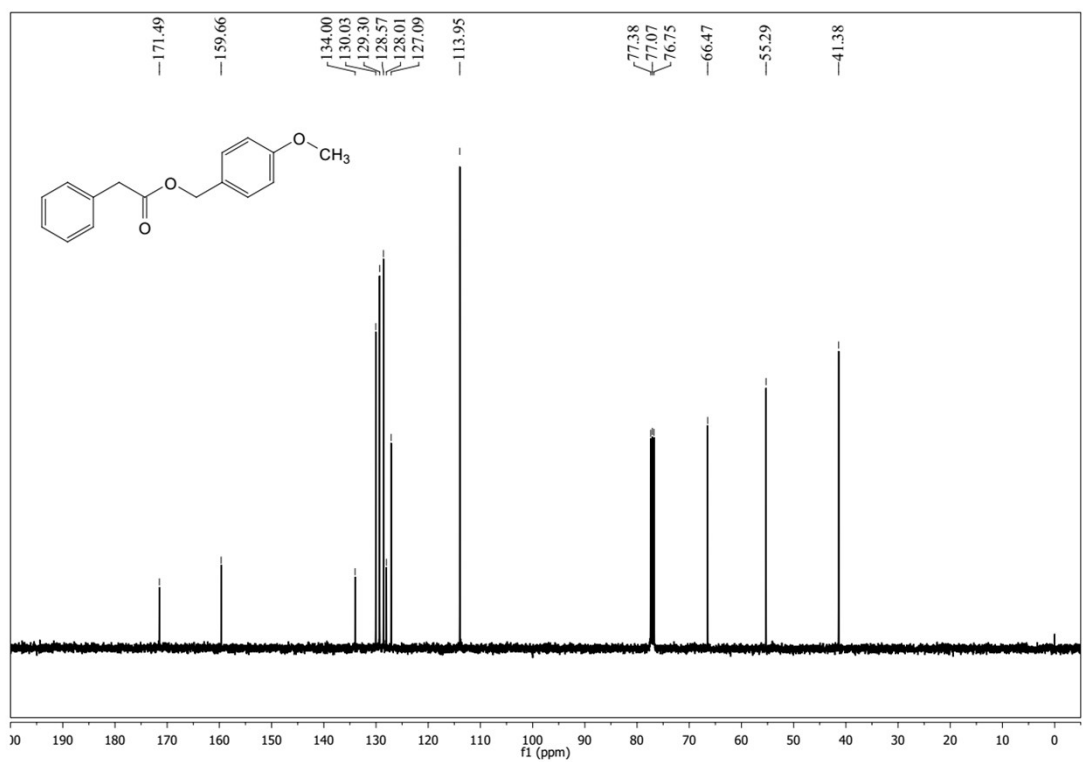

### <sup>1</sup>H NMR Spectra of 5al

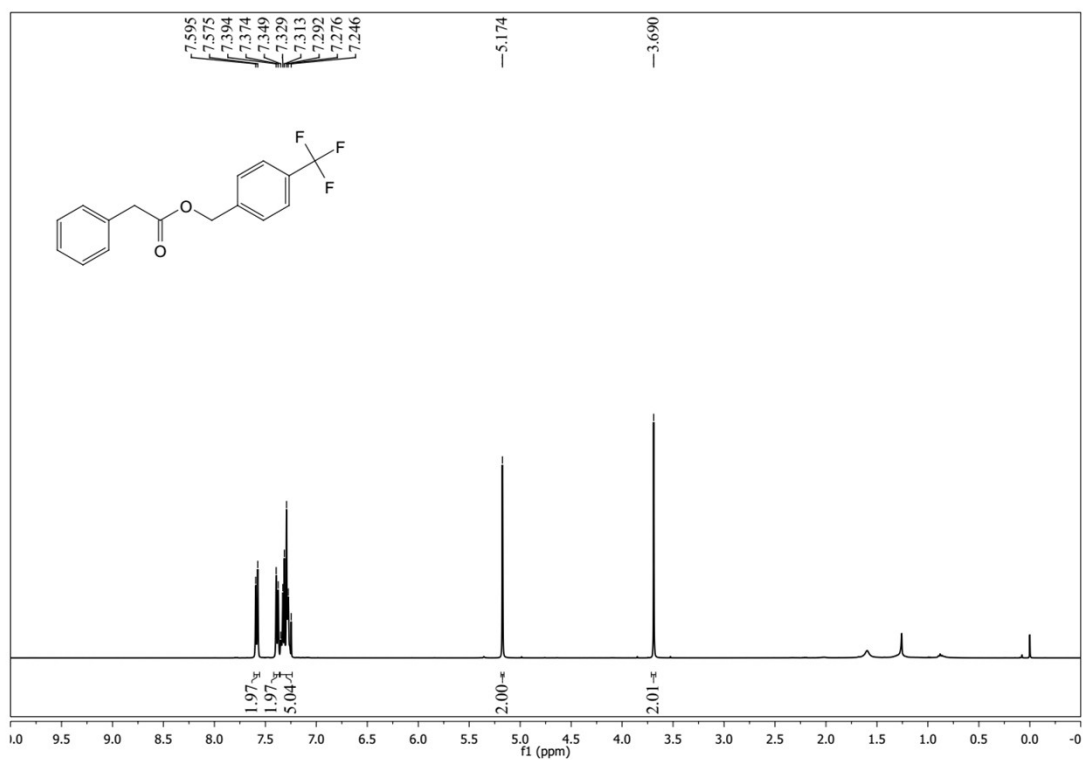

### <sup>13</sup>C NMR Spectra of 5a

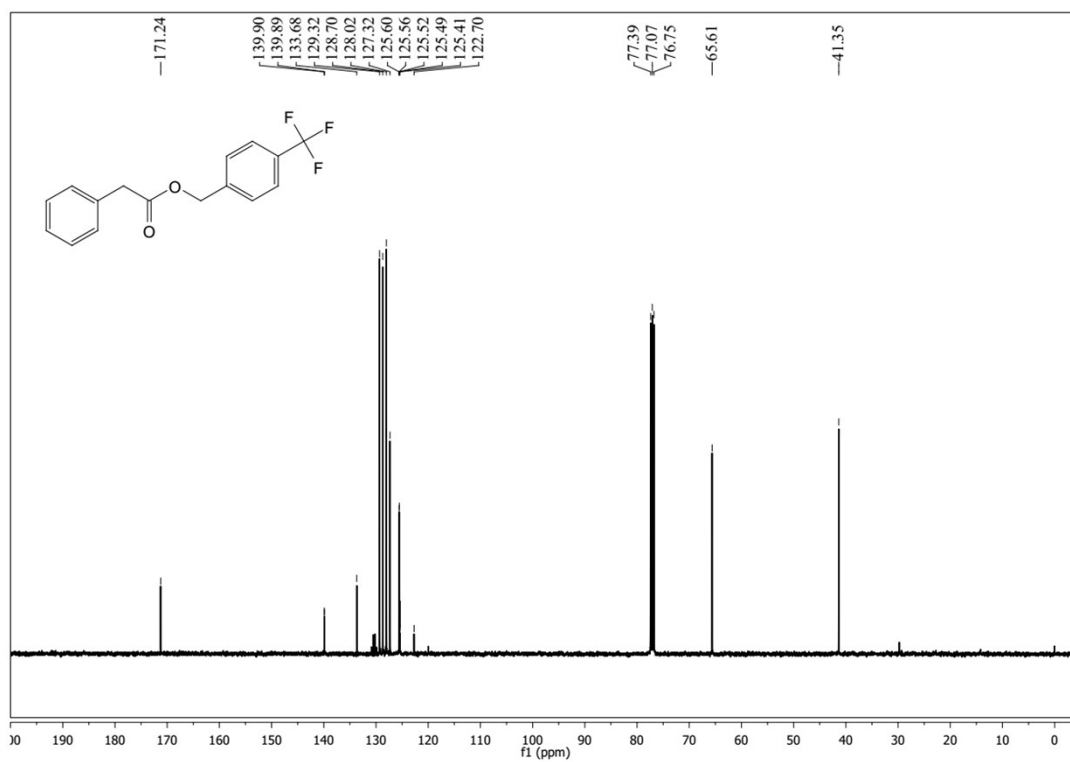

### <sup>1</sup>H NMR Spectra of 5am

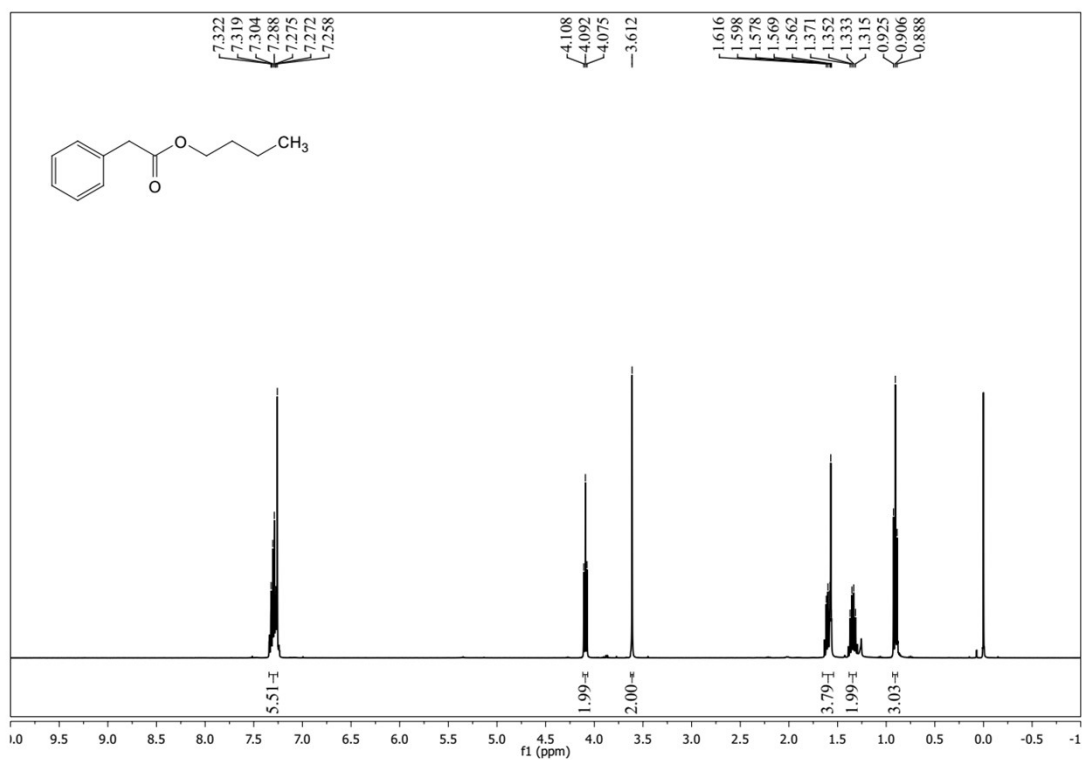

### <sup>13</sup>C NMR Spectra of 5an

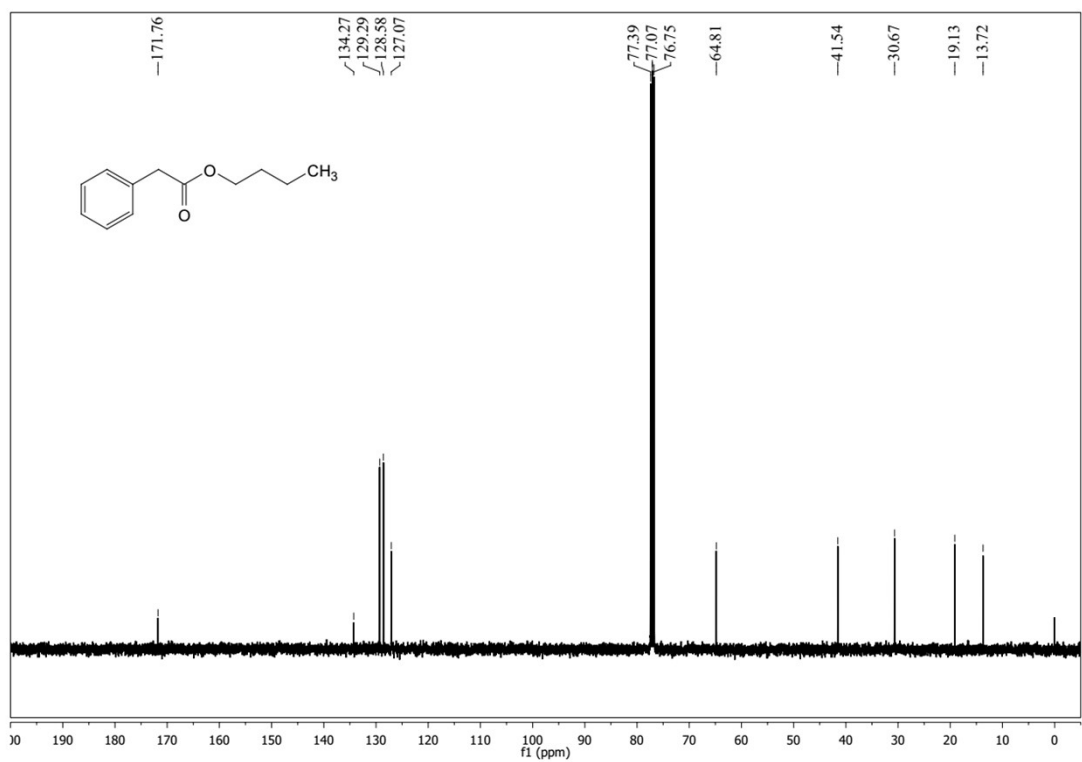

### <sup>1</sup>H NMR Spectra of 5an

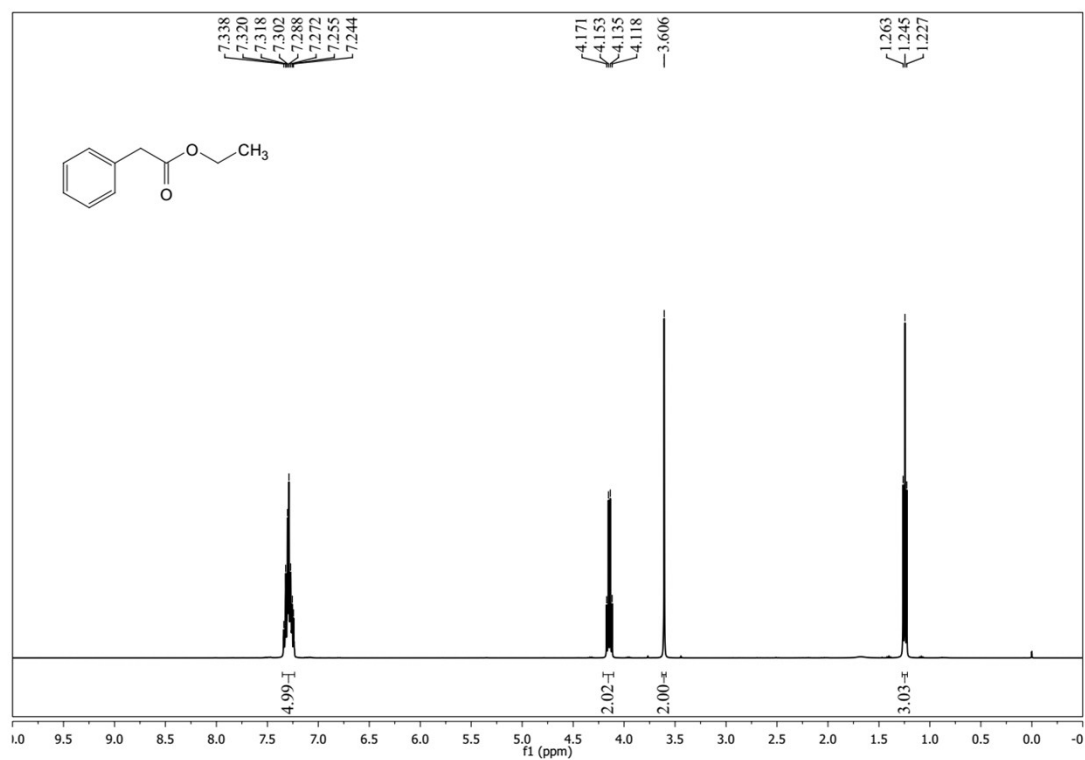

### <sup>13</sup>C NMR Spectra of 5an

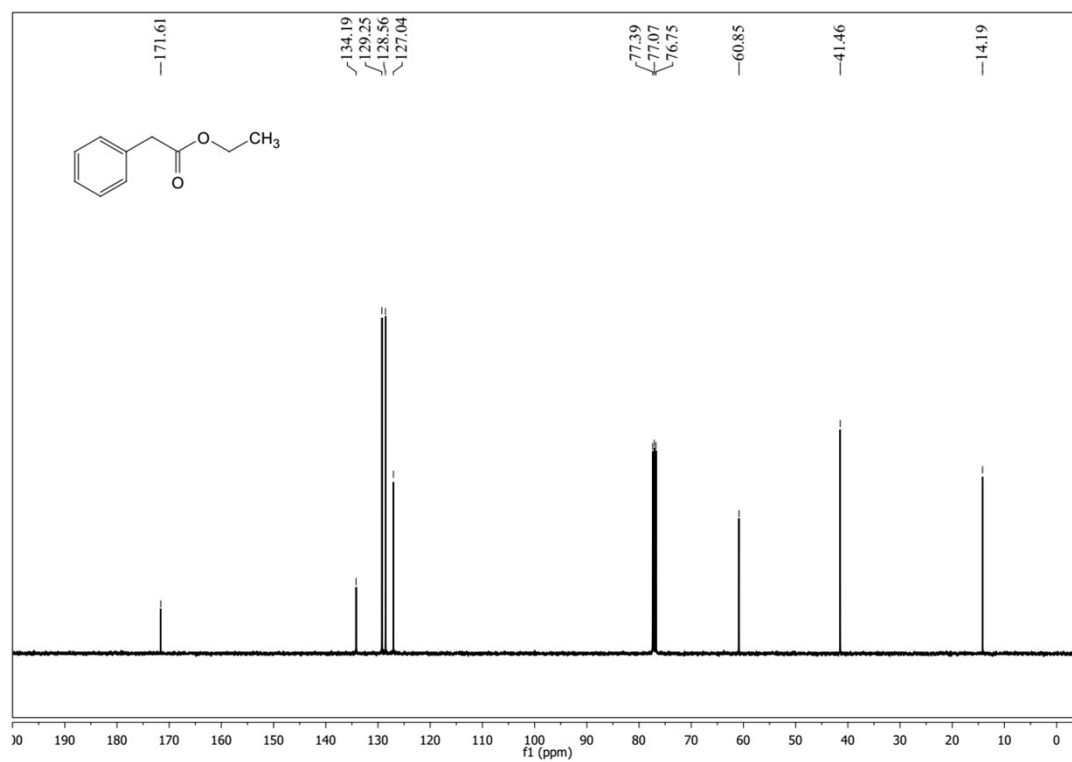

### <sup>1</sup>H NMR Spectra of 5ao



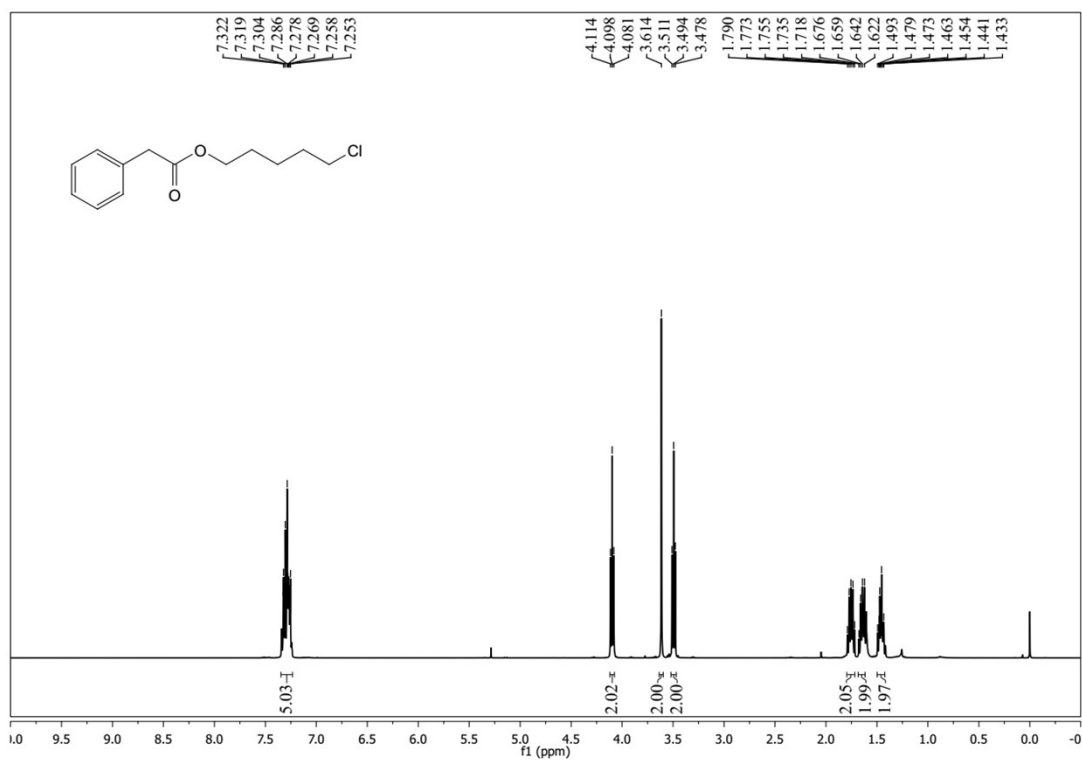

### <sup>13</sup>C NMR Spectra of 5ap

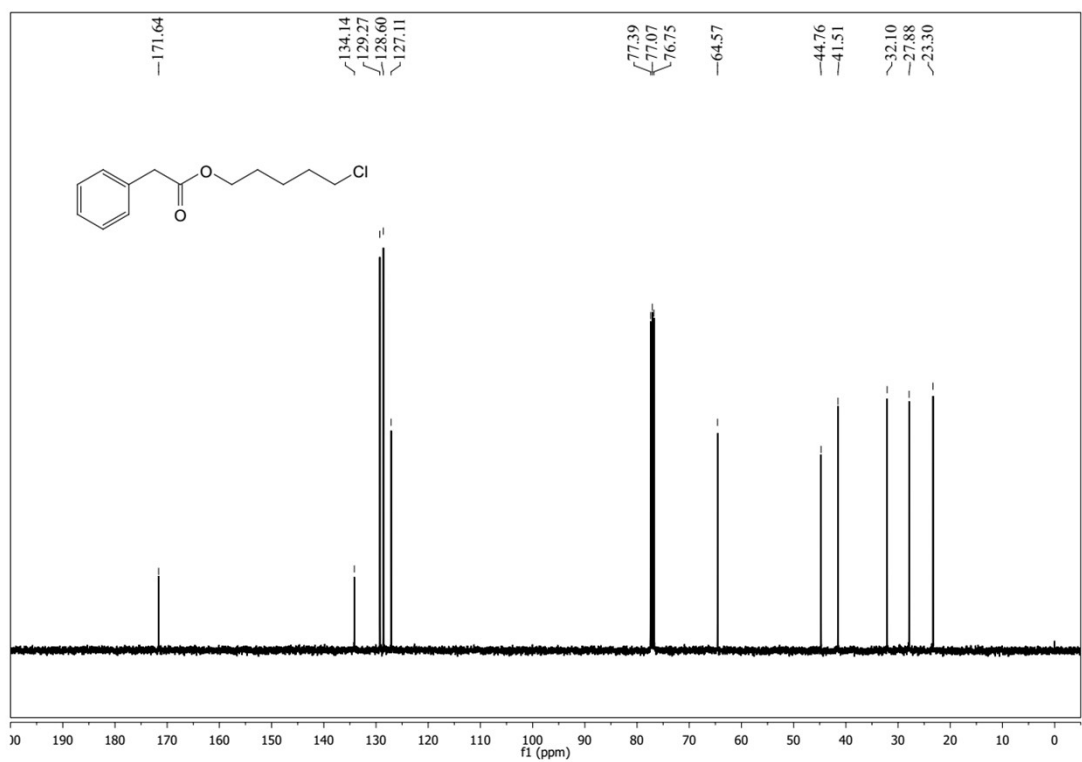

### <sup>1</sup>H NMR Spectra of 5ap

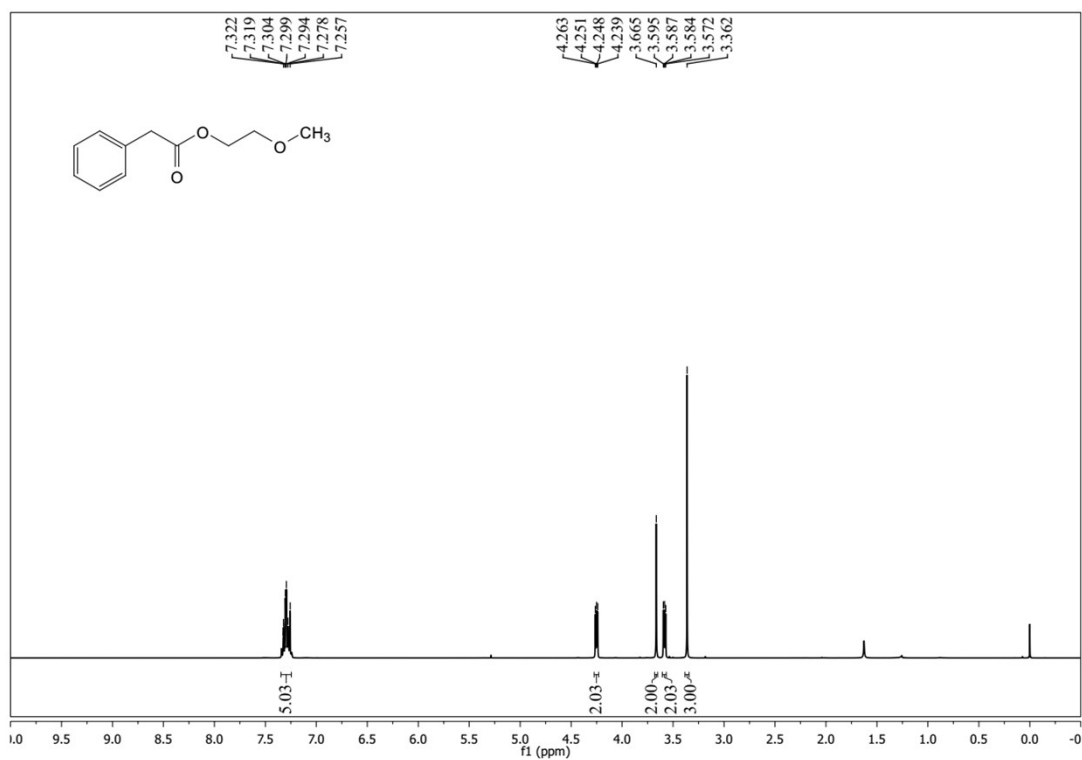

### <sup>13</sup>C NMR Spectra of 5ap

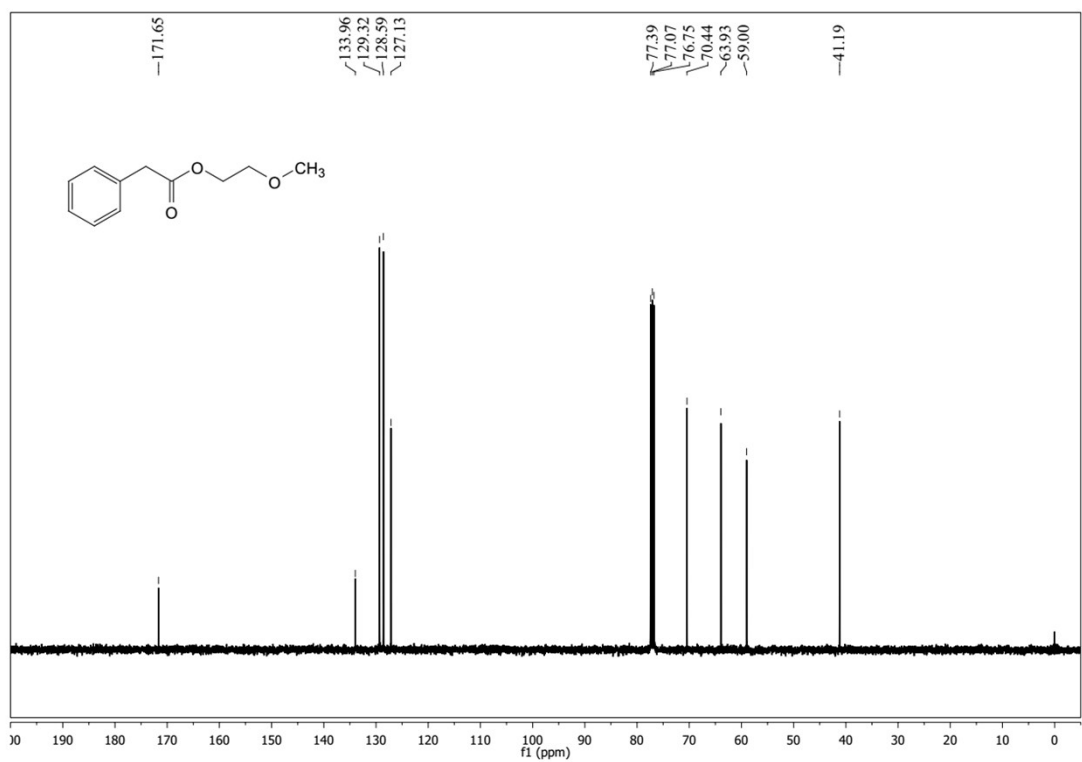

### <sup>1</sup>H NMR Spectra of 5aq

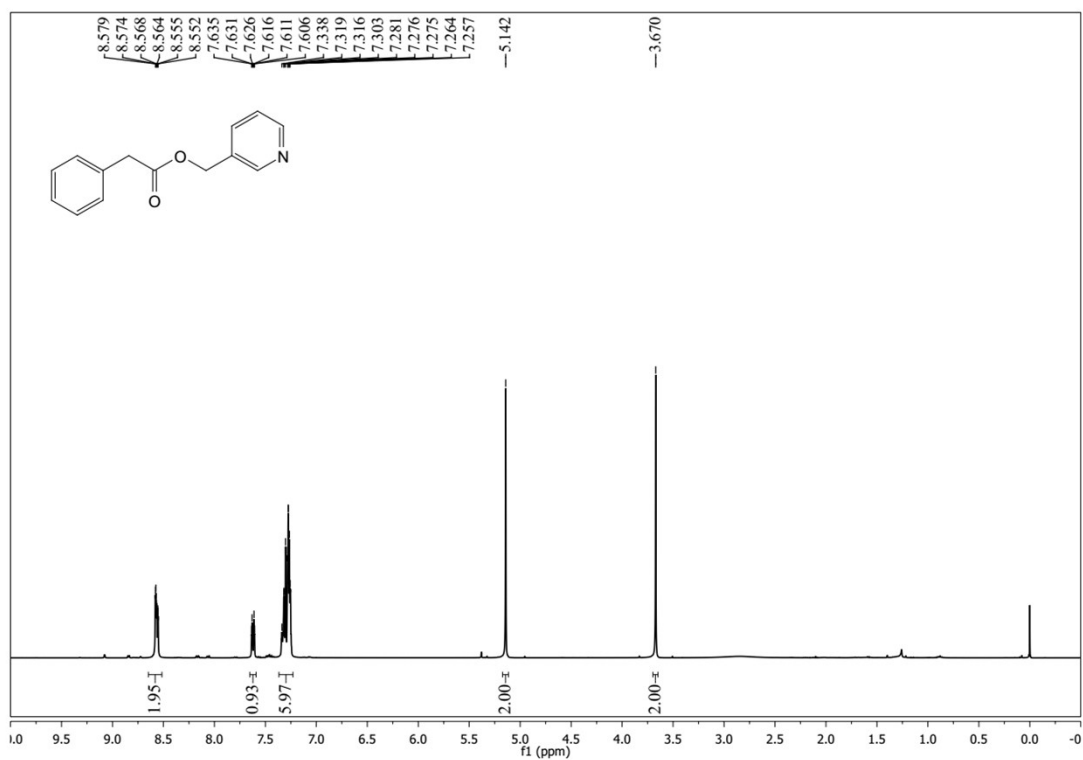

### <sup>13</sup>C NMR Spectra of 5aq

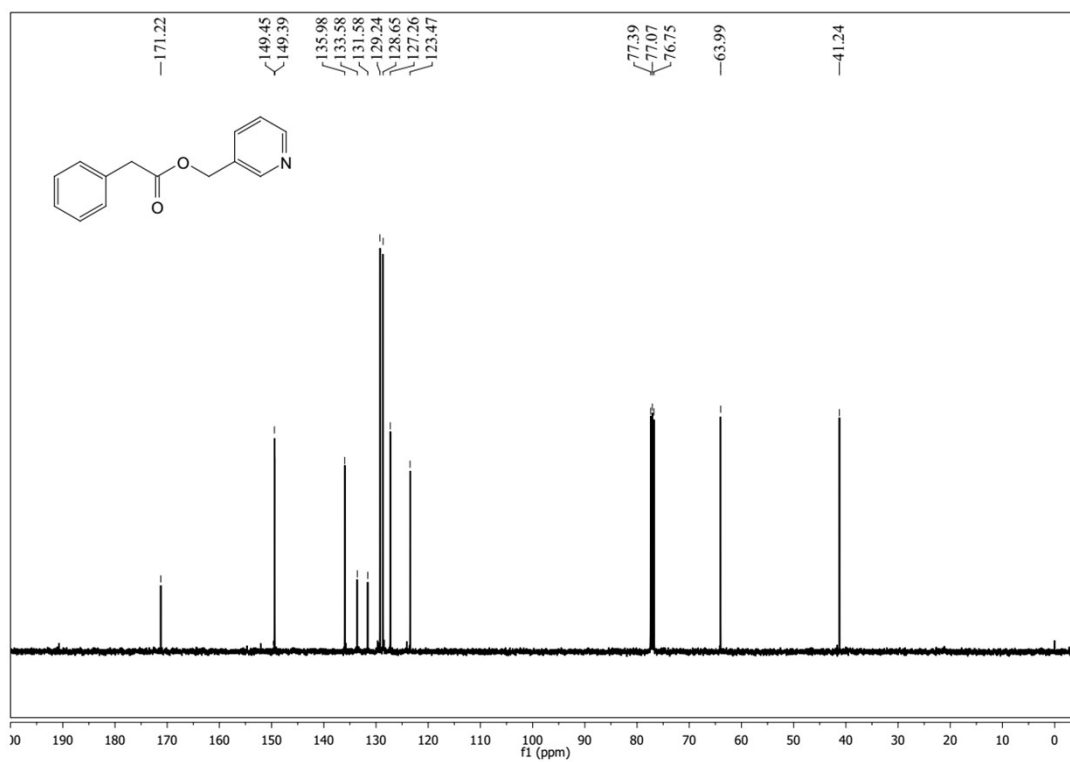

### <sup>1</sup>H NMR Spectra of 5ar

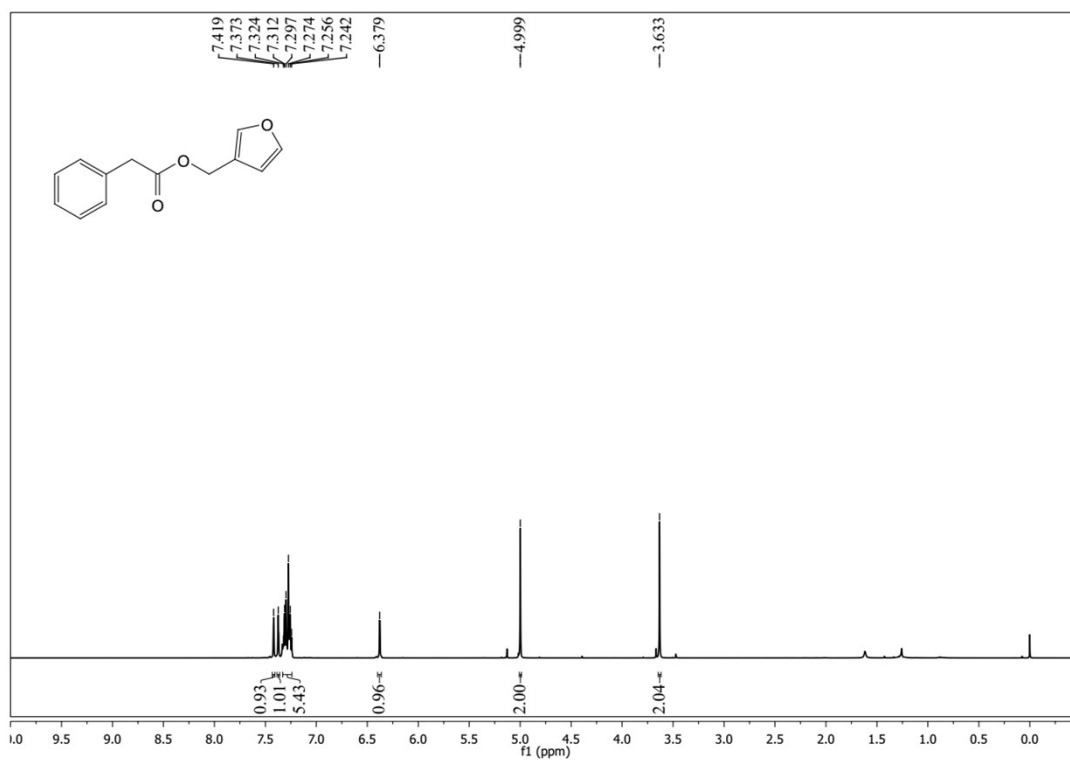

### <sup>13</sup>C NMR Spectra of 5ar

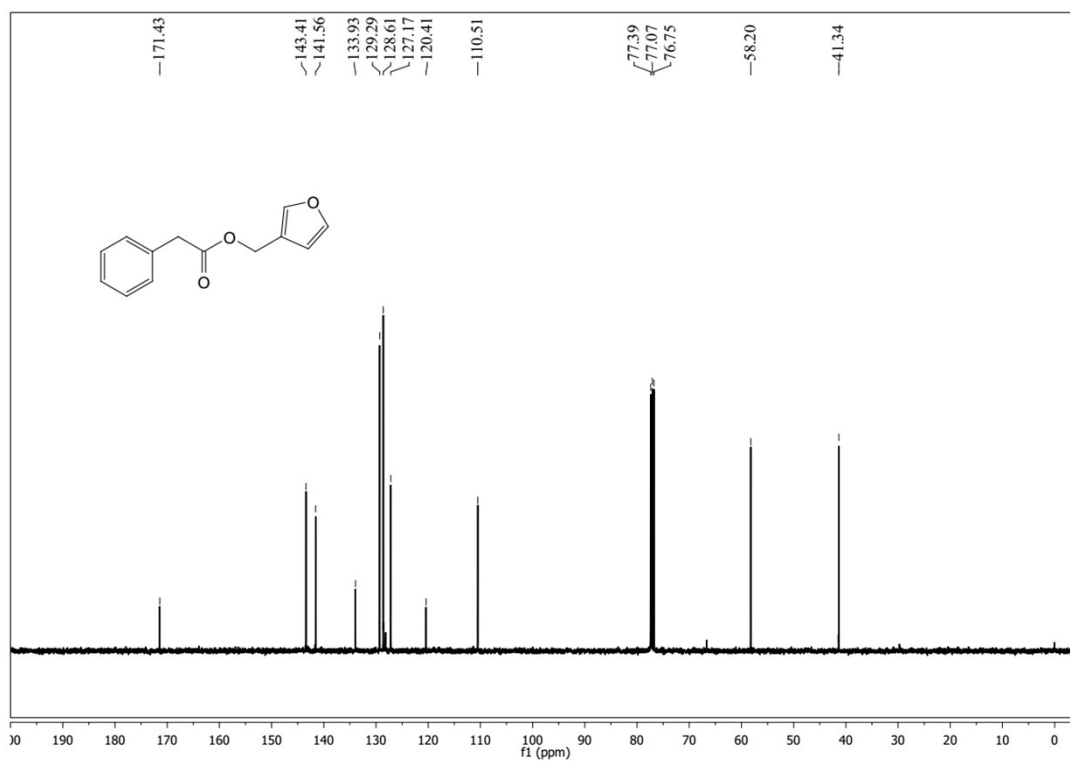

### <sup>1</sup>H NMR Spectra of 5as

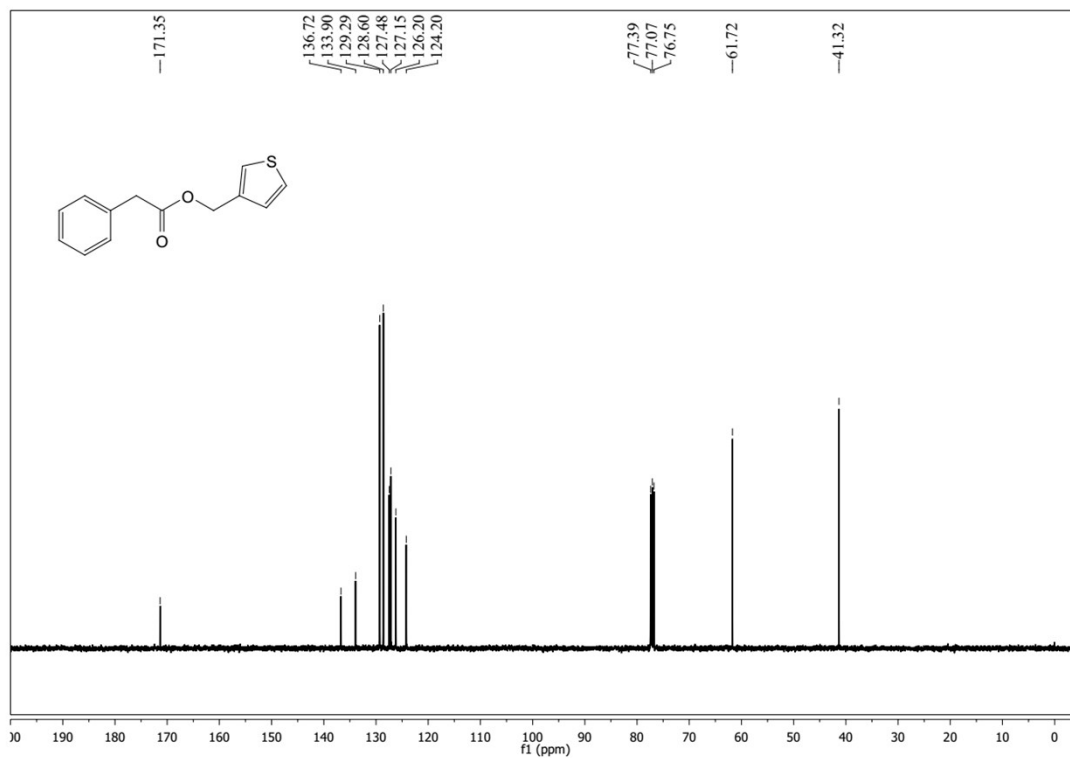

**<sup>13</sup>C NMR Spectra of 5as**

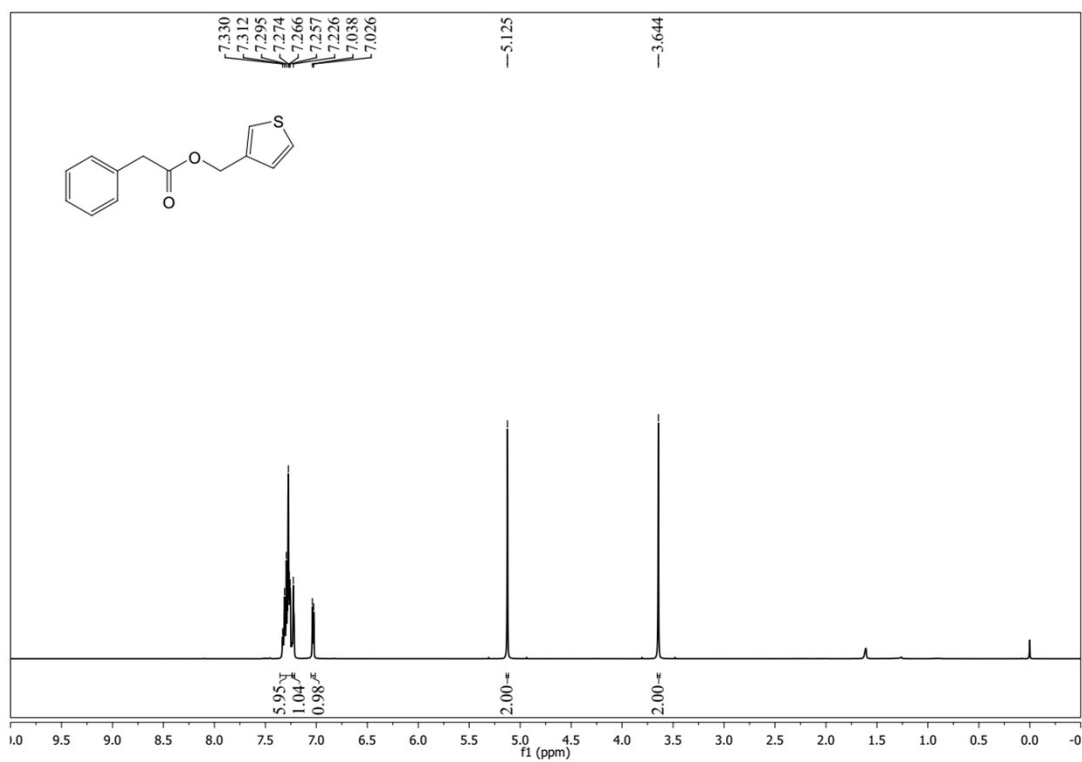

**<sup>1</sup>H NMR Spectra of 5at**

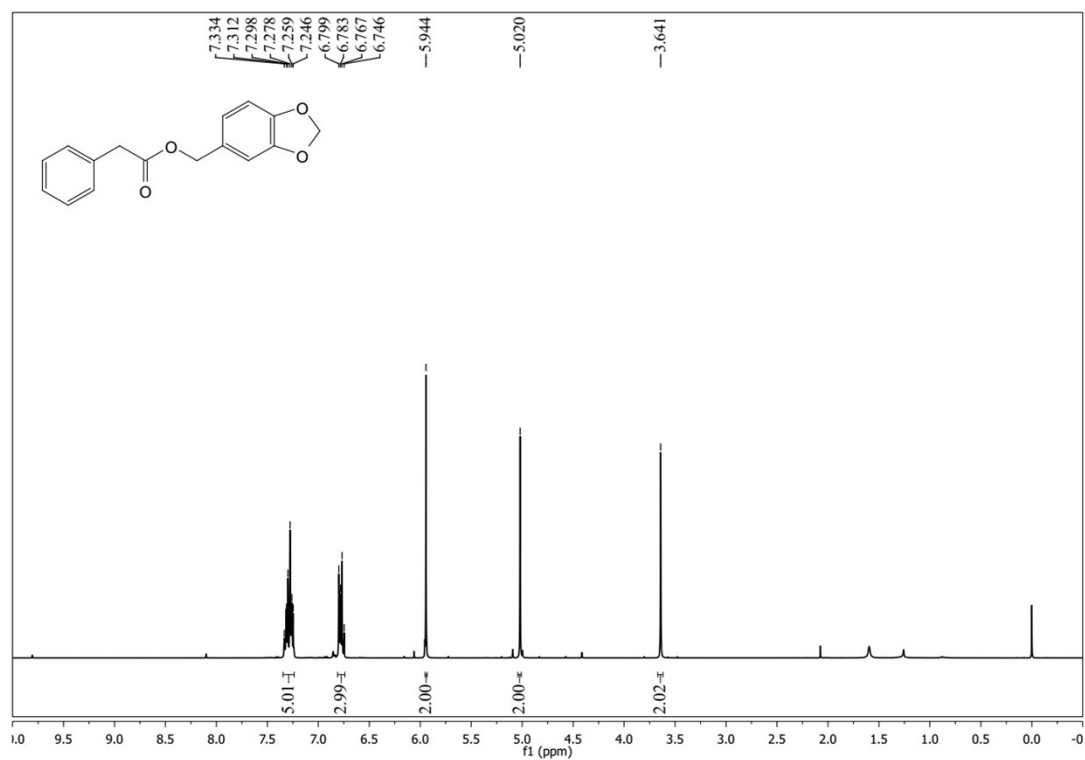

### <sup>13</sup>C NMR Spectra of 5at

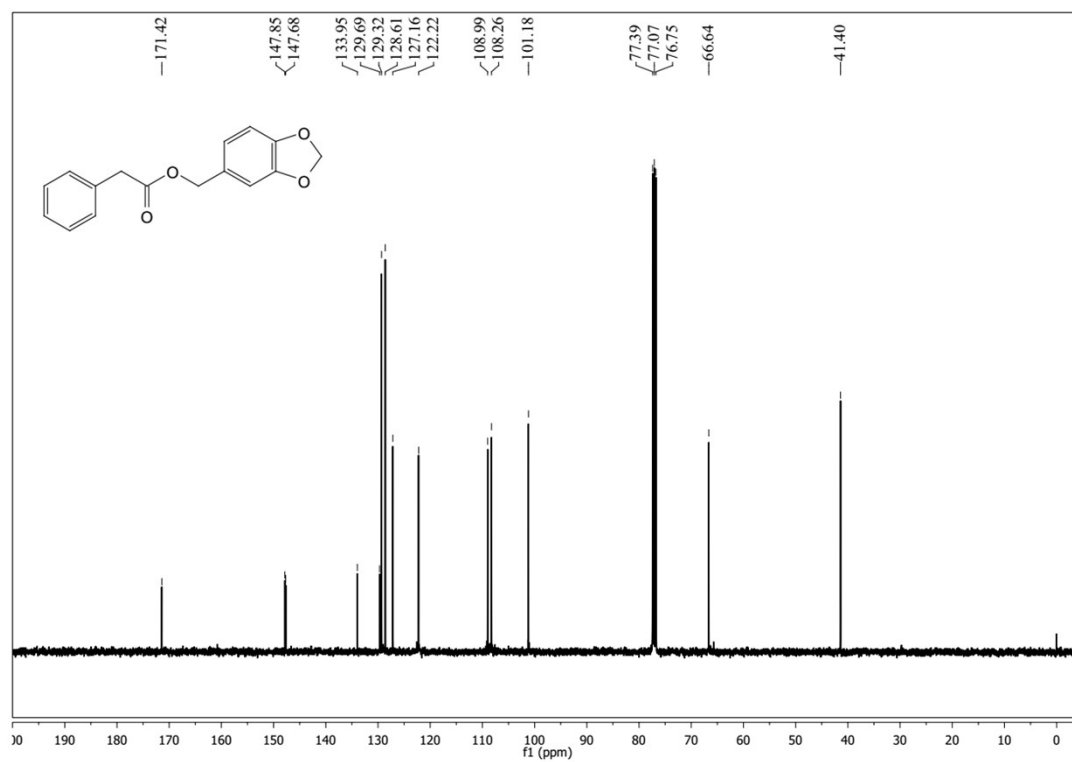

### <sup>1</sup>H NMR Spectra of 5au

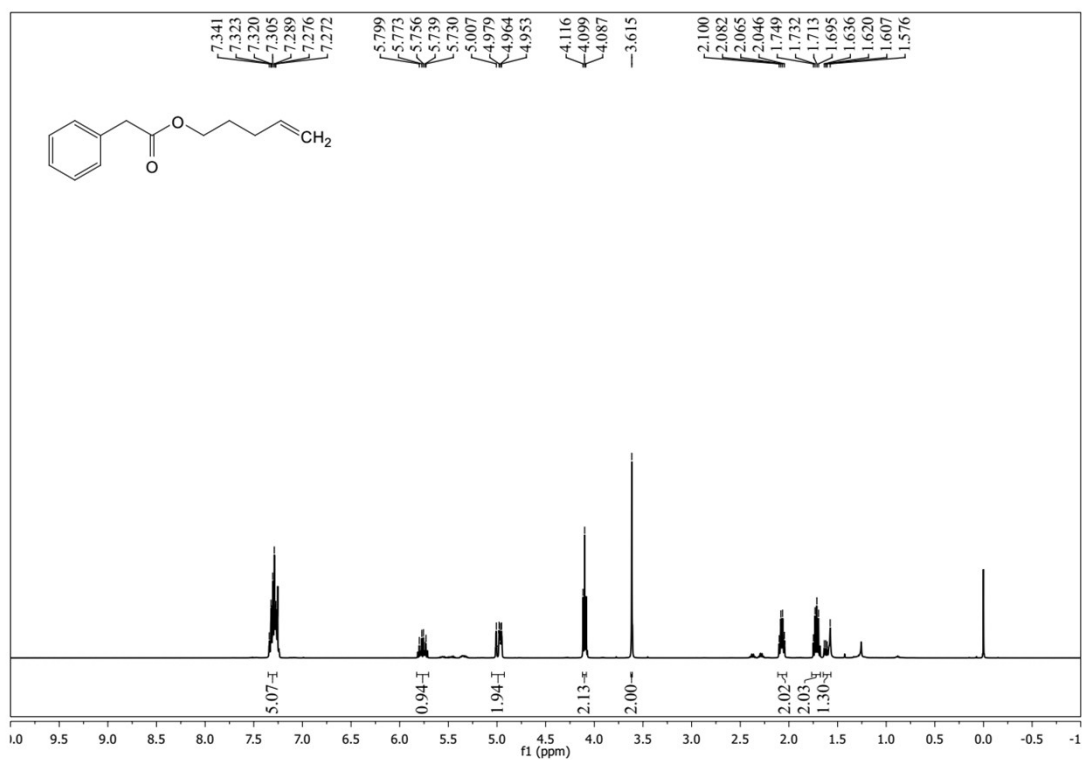

### <sup>13</sup>C NMR Spectra of 5au

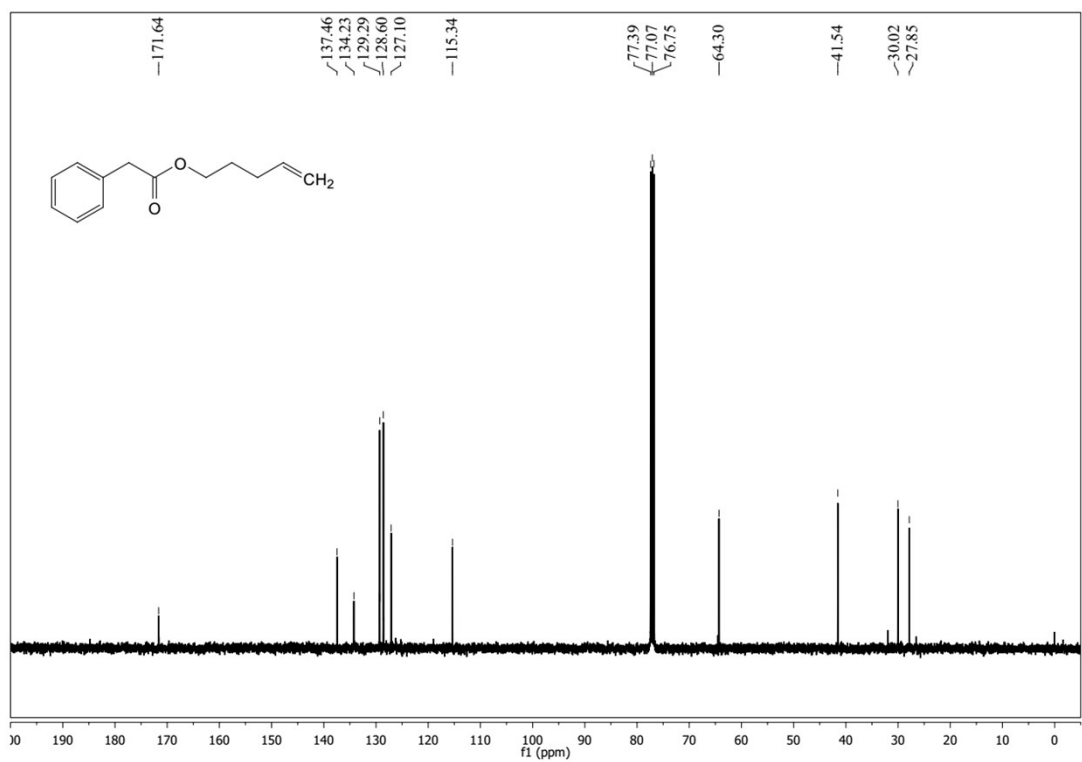

### <sup>1</sup>H NMR Spectra of 5av

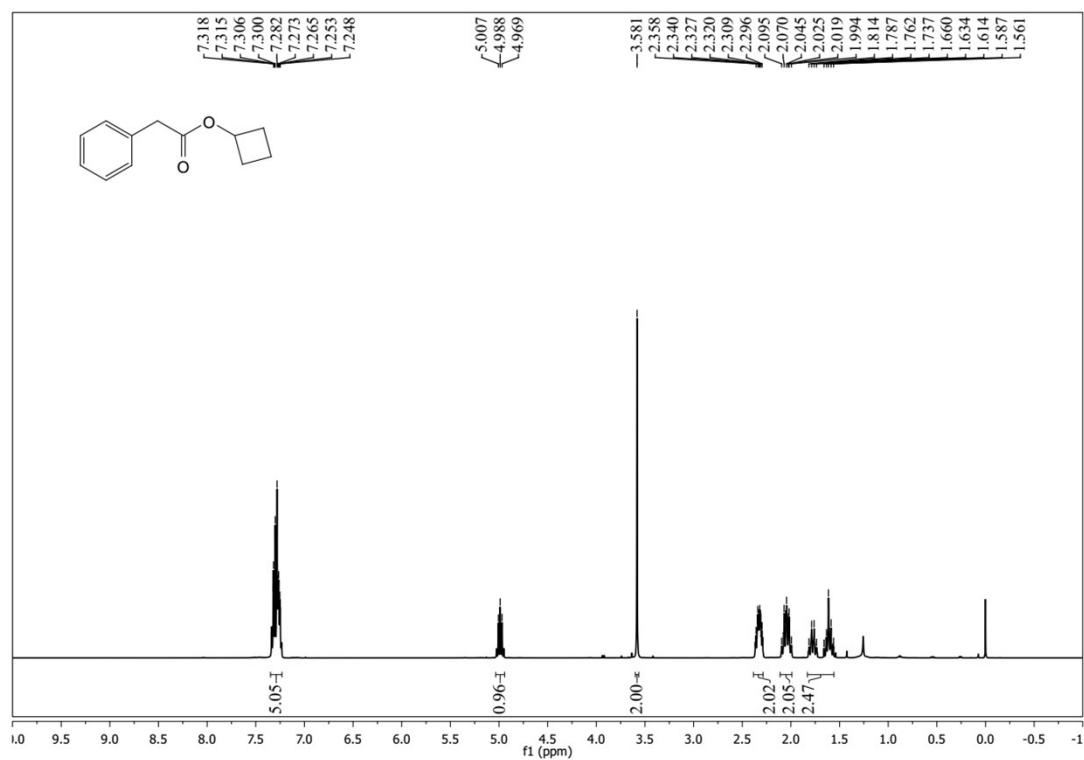

### <sup>13</sup>C NMR Spectra of 5av

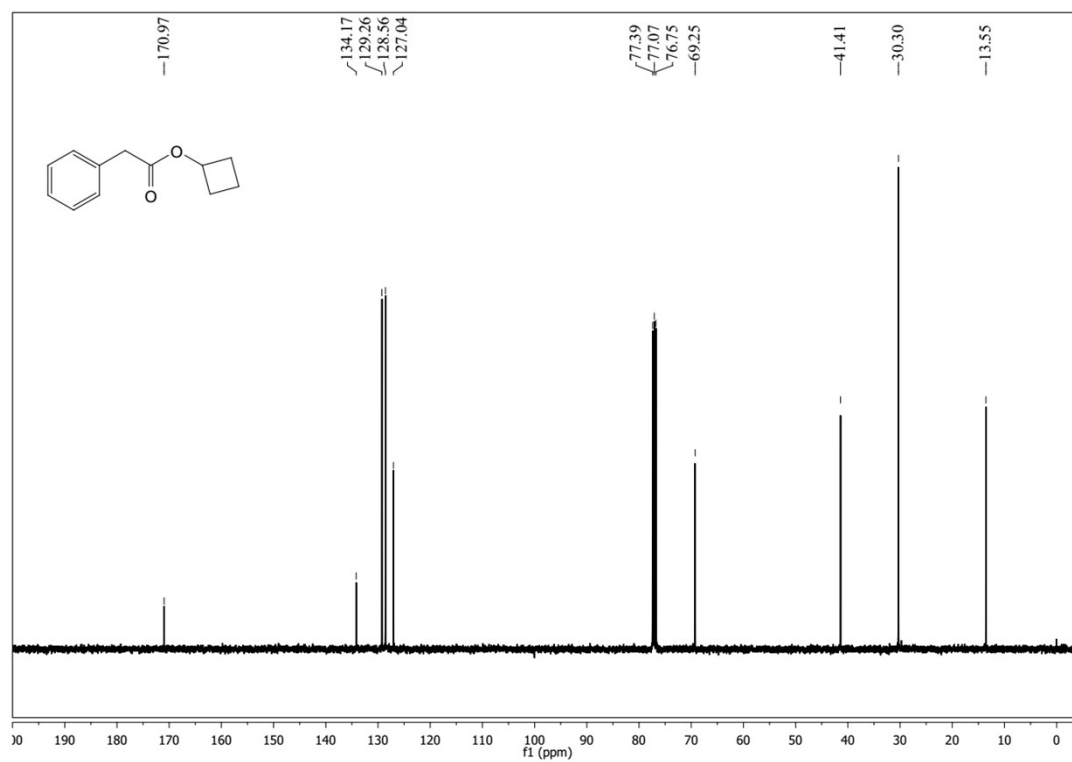

### <sup>1</sup>H NMR Spectra of 5aw



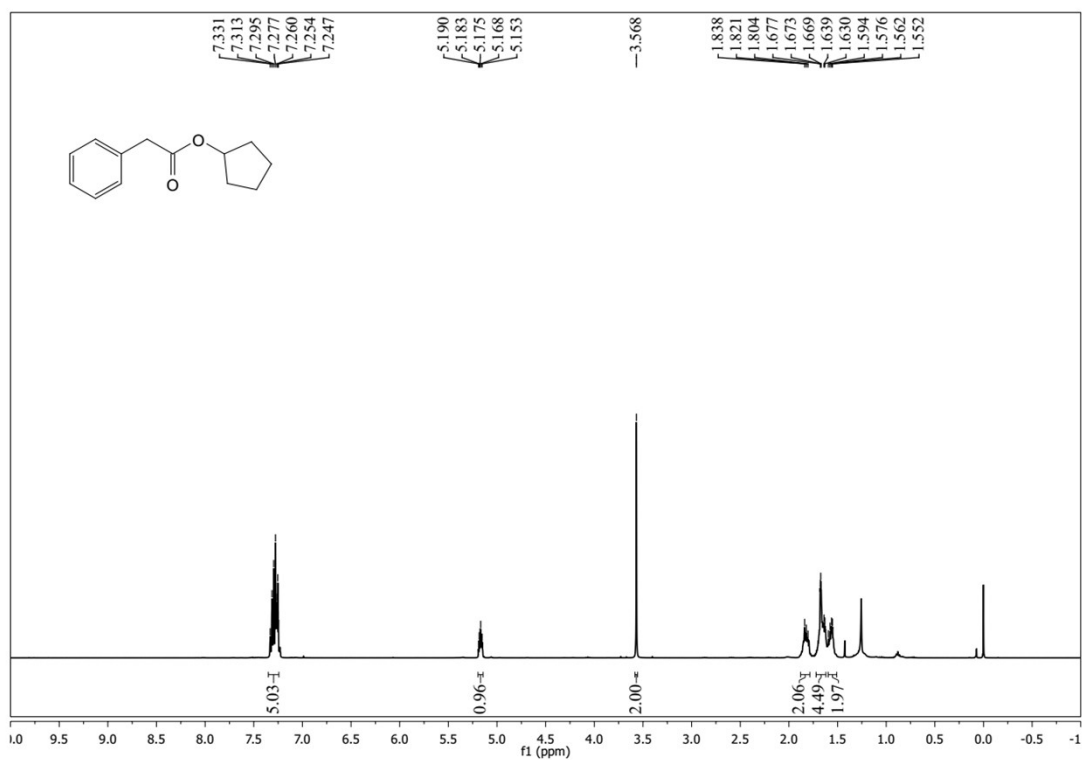

### <sup>13</sup>C NMR Spectra of 5aw

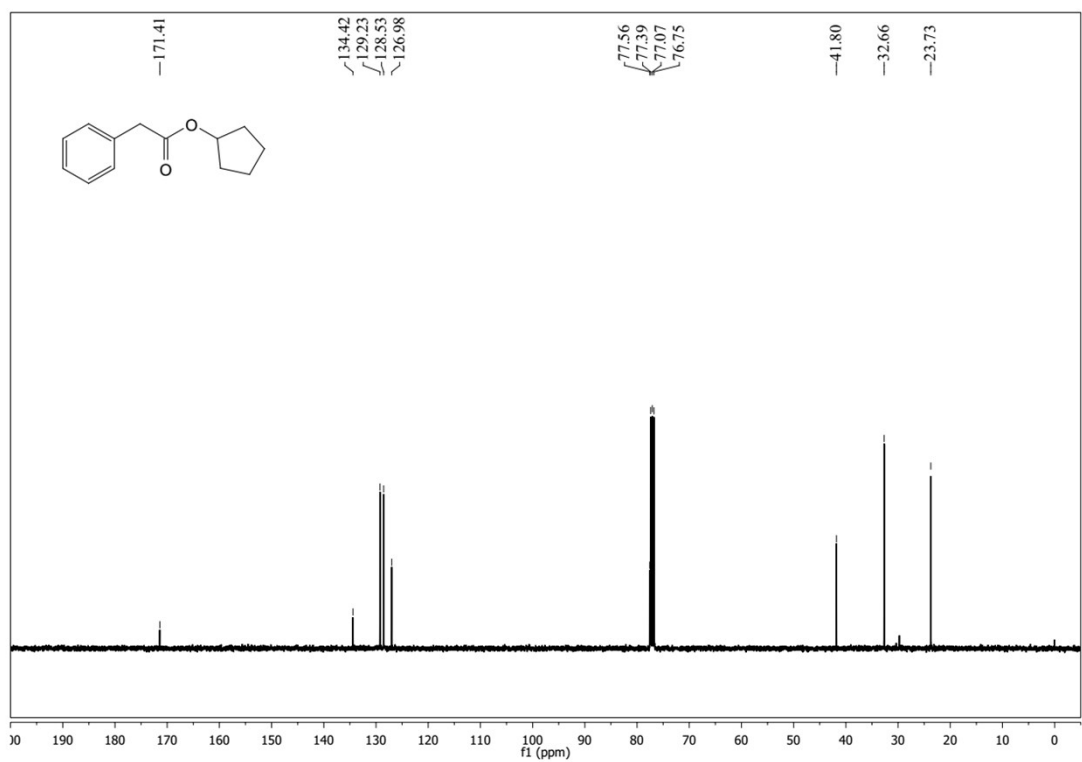

### <sup>1</sup>H NMR Spectra of 5ax

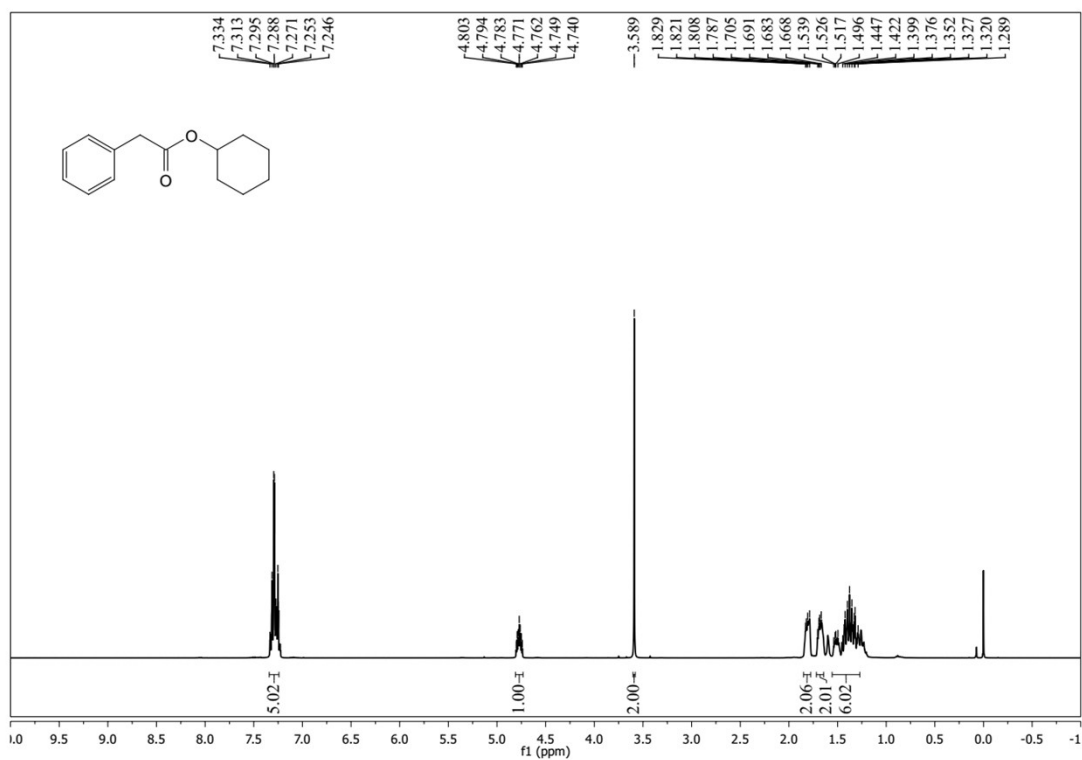

### <sup>13</sup>C NMR Spectra of 5ax

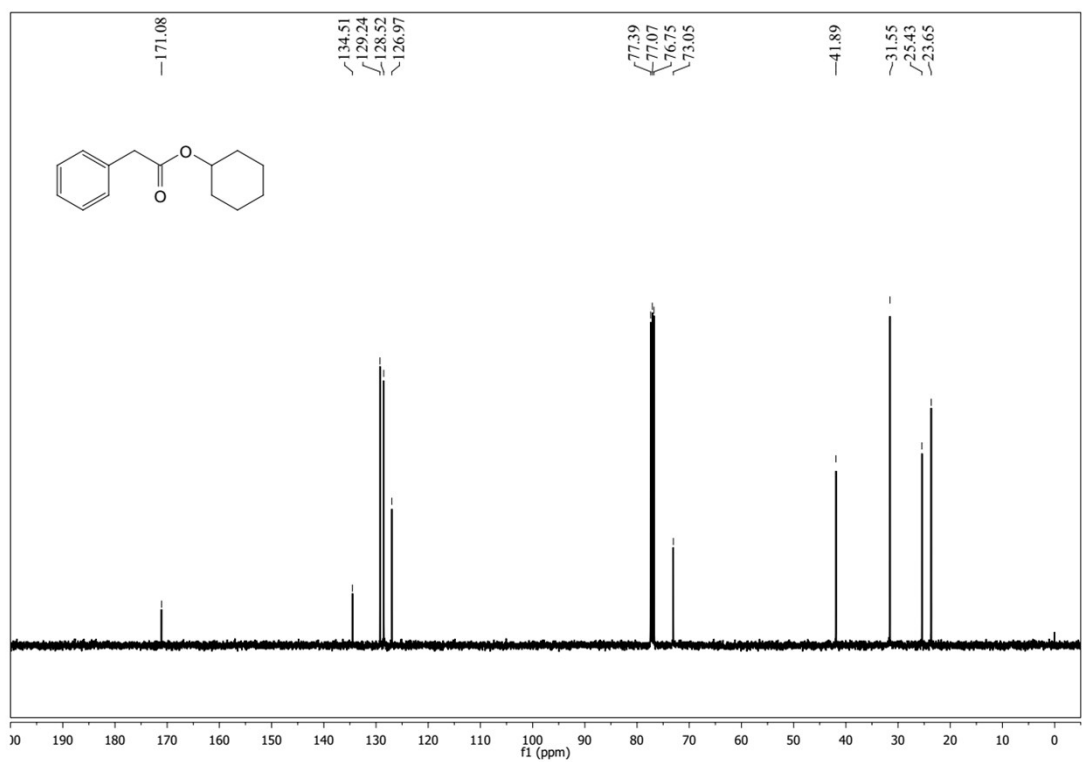

### <sup>1</sup>H NMR Spectra of 5ay

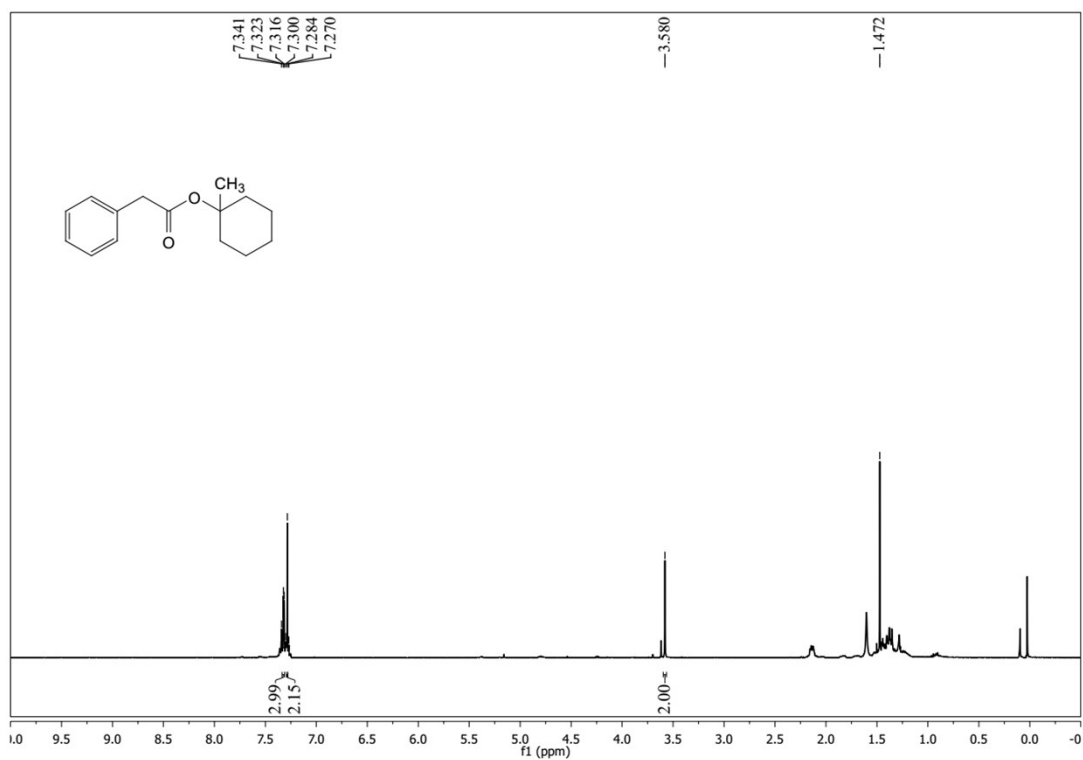

### <sup>13</sup>C NMR Spectra of 5a

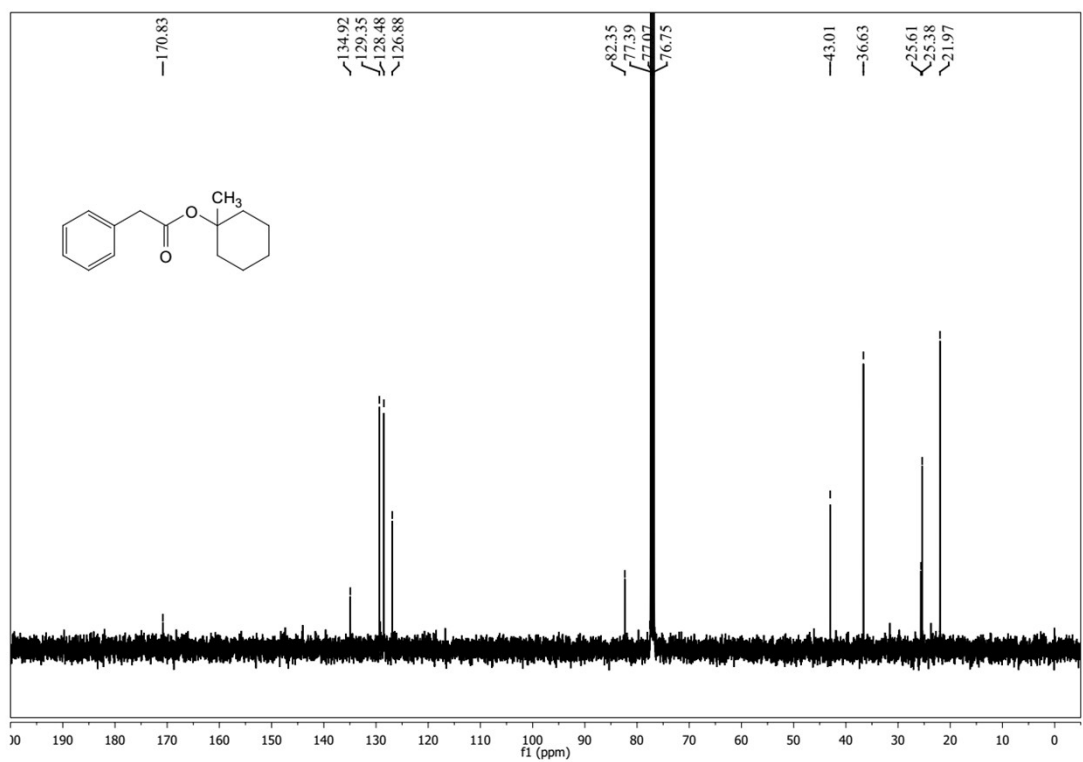

### <sup>1</sup>H NMR Spectra of 7aa

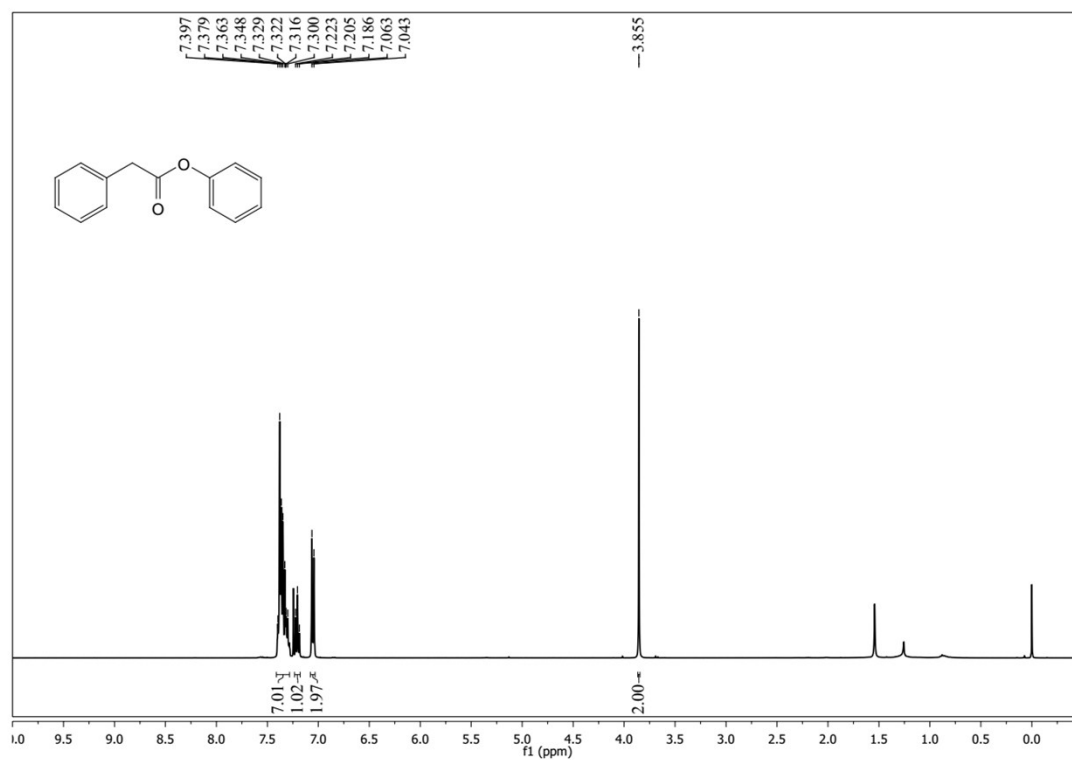

### <sup>13</sup>C NMR Spectra of 7aa

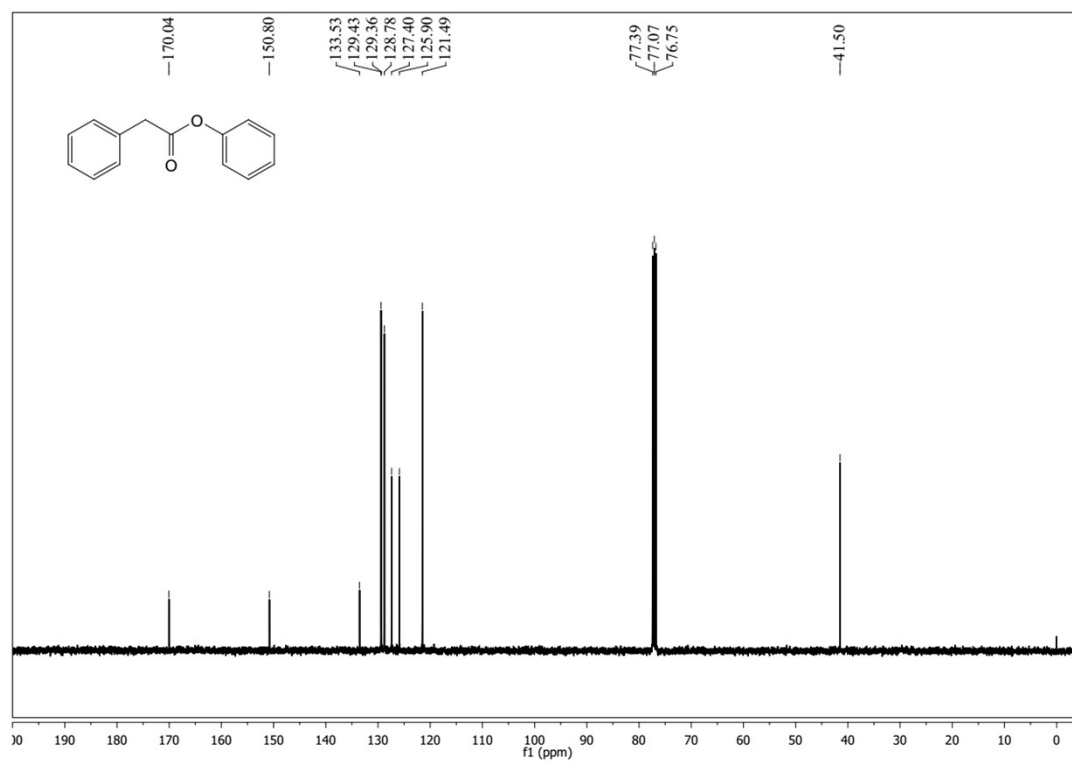

### <sup>1</sup>H NMR Spectra of 7ab

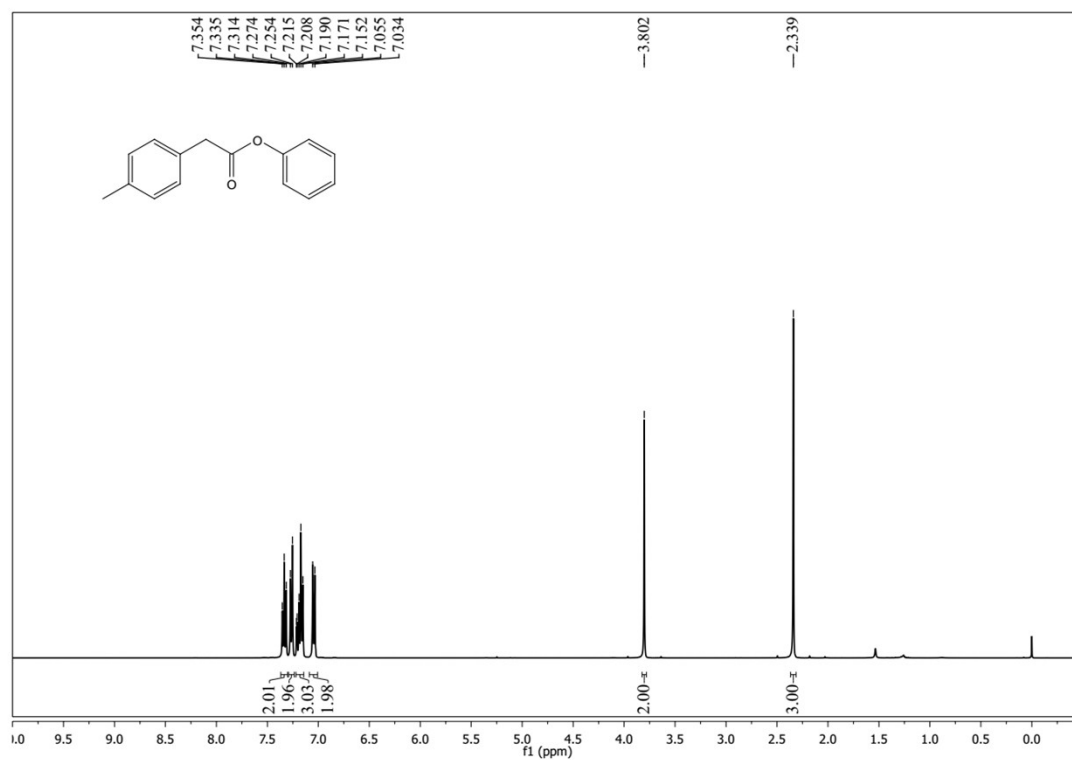

### <sup>13</sup>C NMR Spectra of 7ab

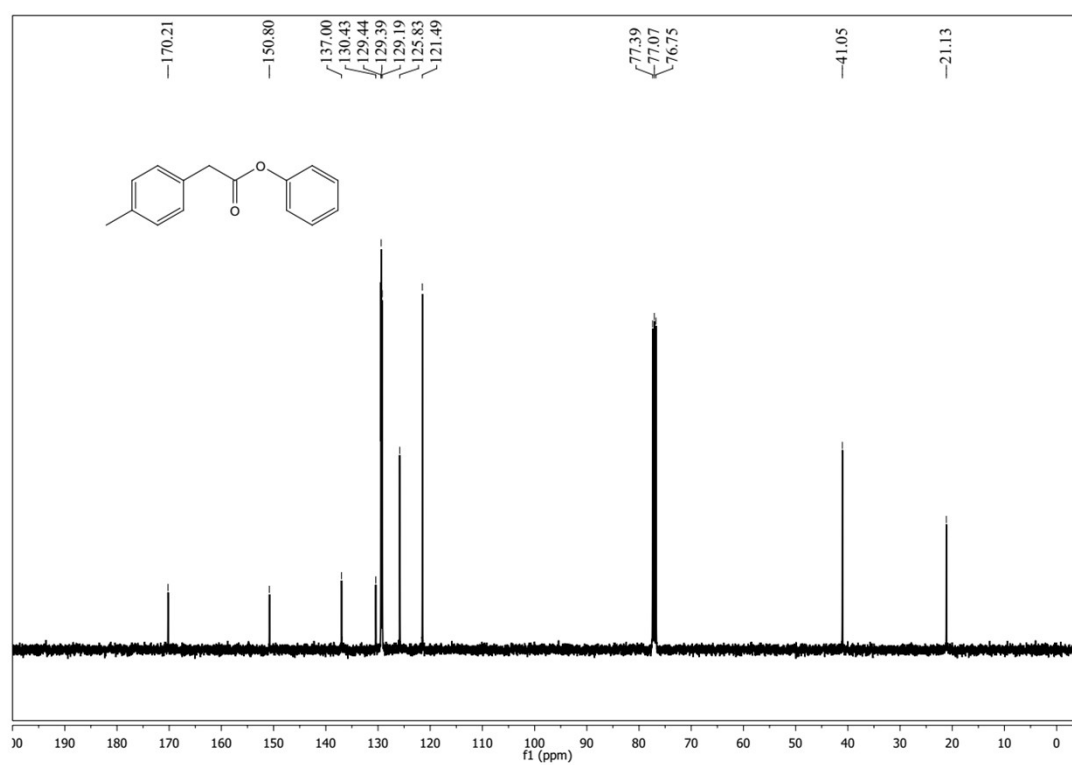

### <sup>1</sup>H NMR Spectra of 7ac

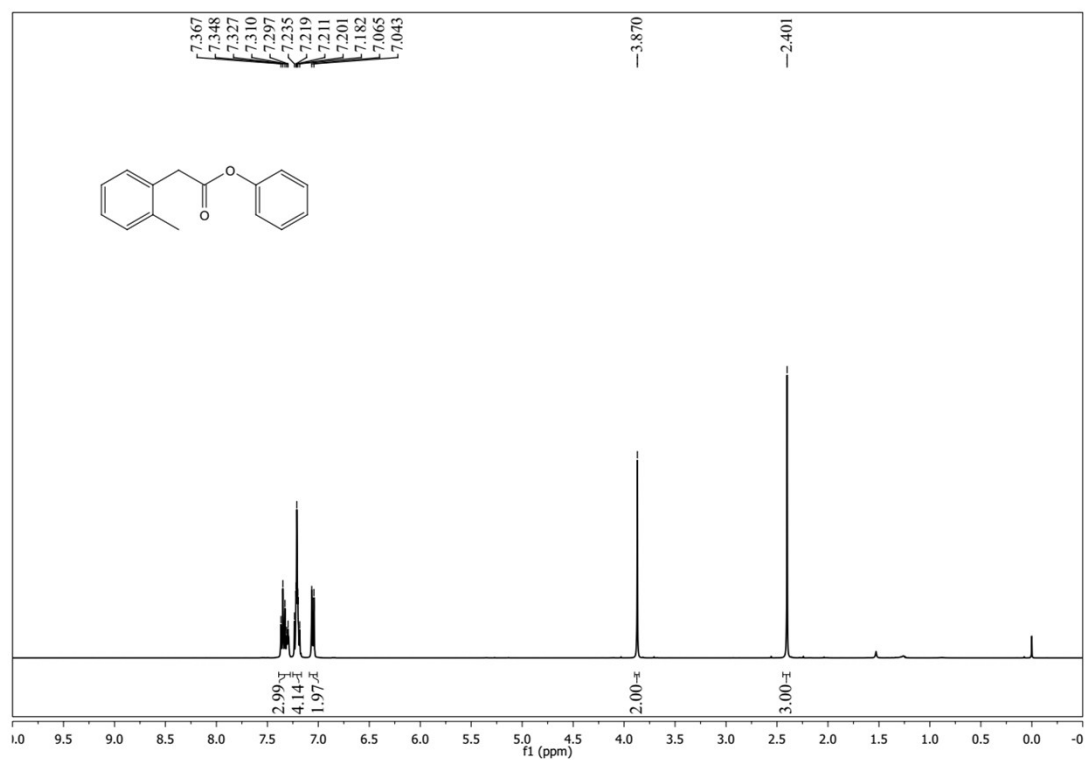

### <sup>13</sup>C NMR Spectra of 7ac

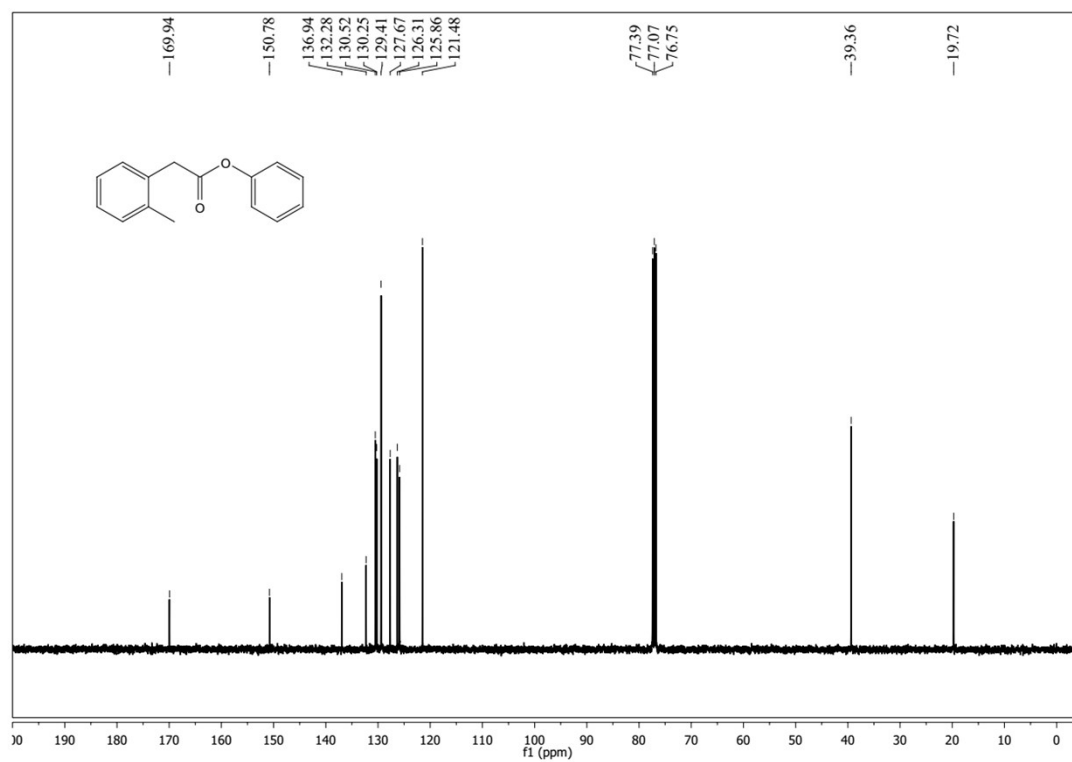

### <sup>1</sup>H NMR Spectra of 7ad

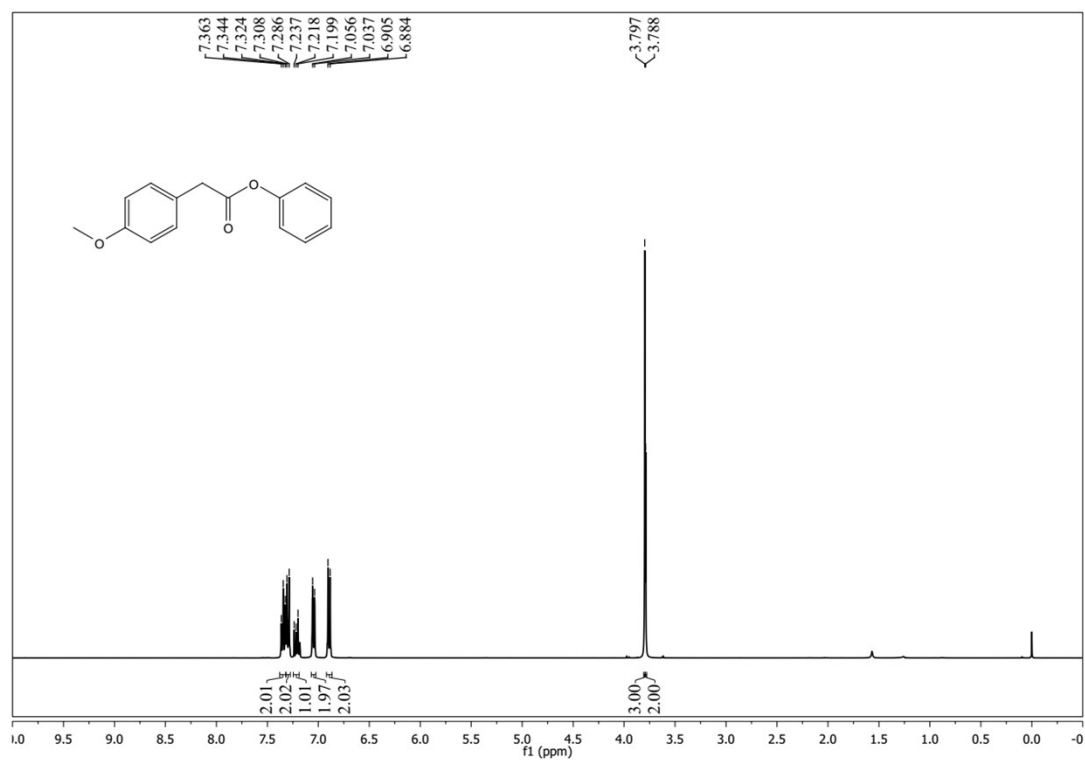

### <sup>13</sup>C NMR Spectra of 7ad

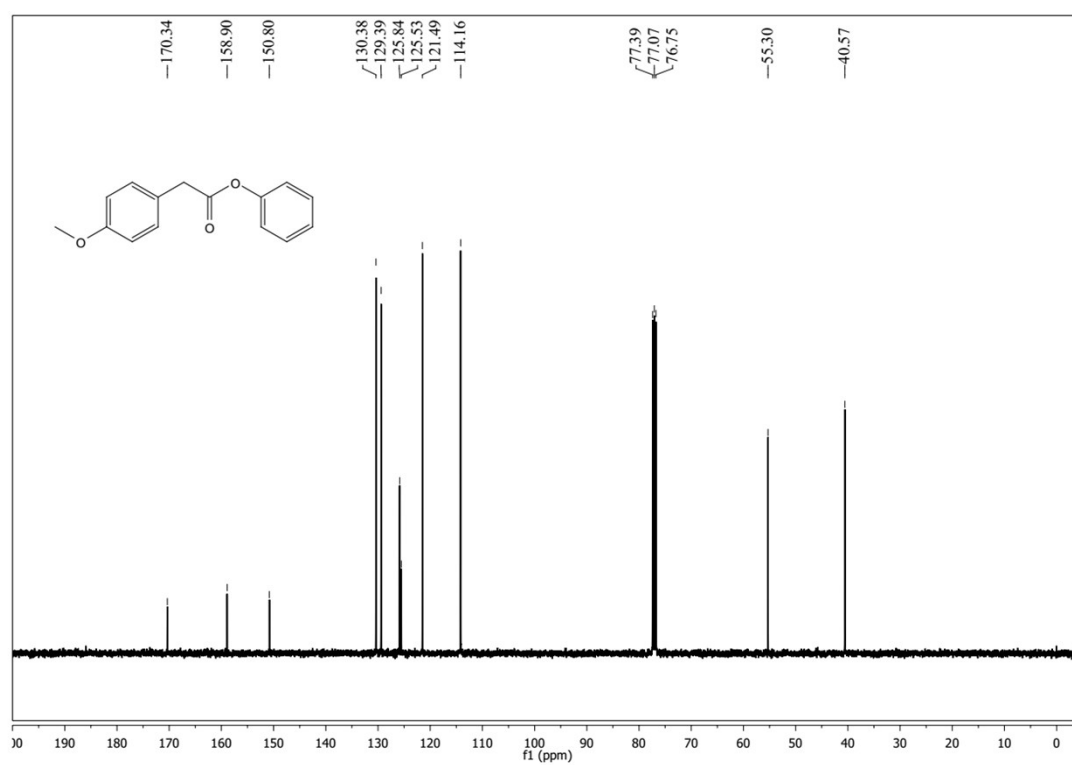

### <sup>1</sup>H NMR Spectra of 7ae

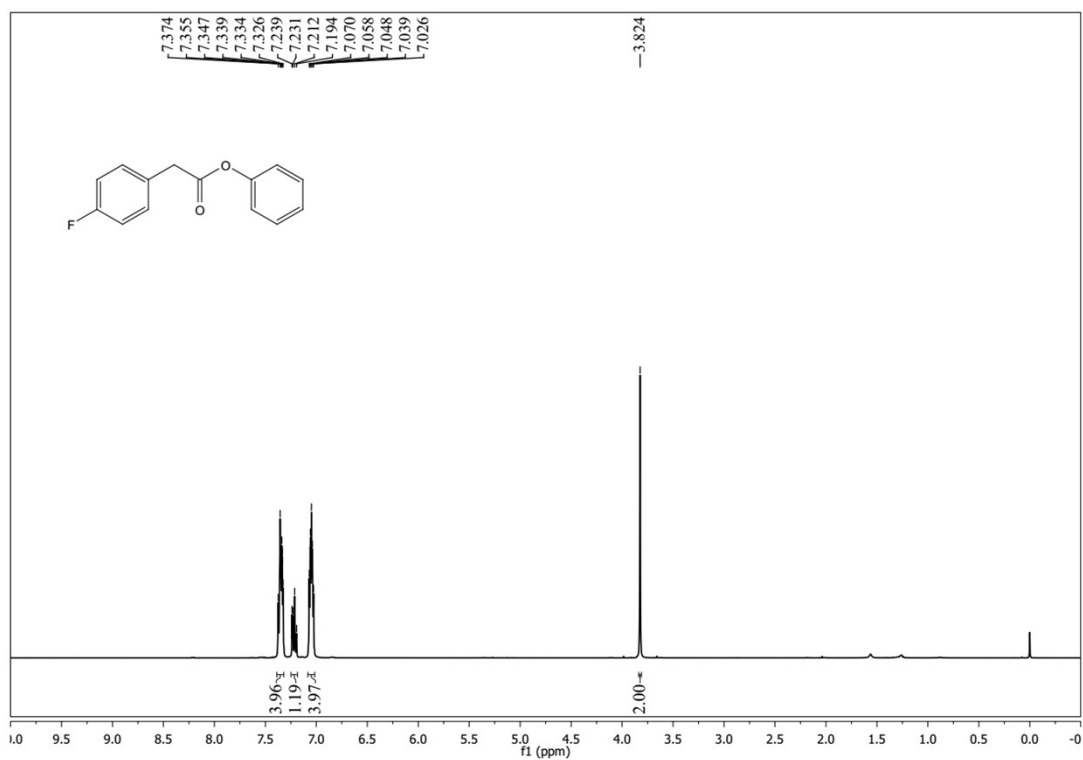

### <sup>13</sup>C NMR Spectra of 7ae

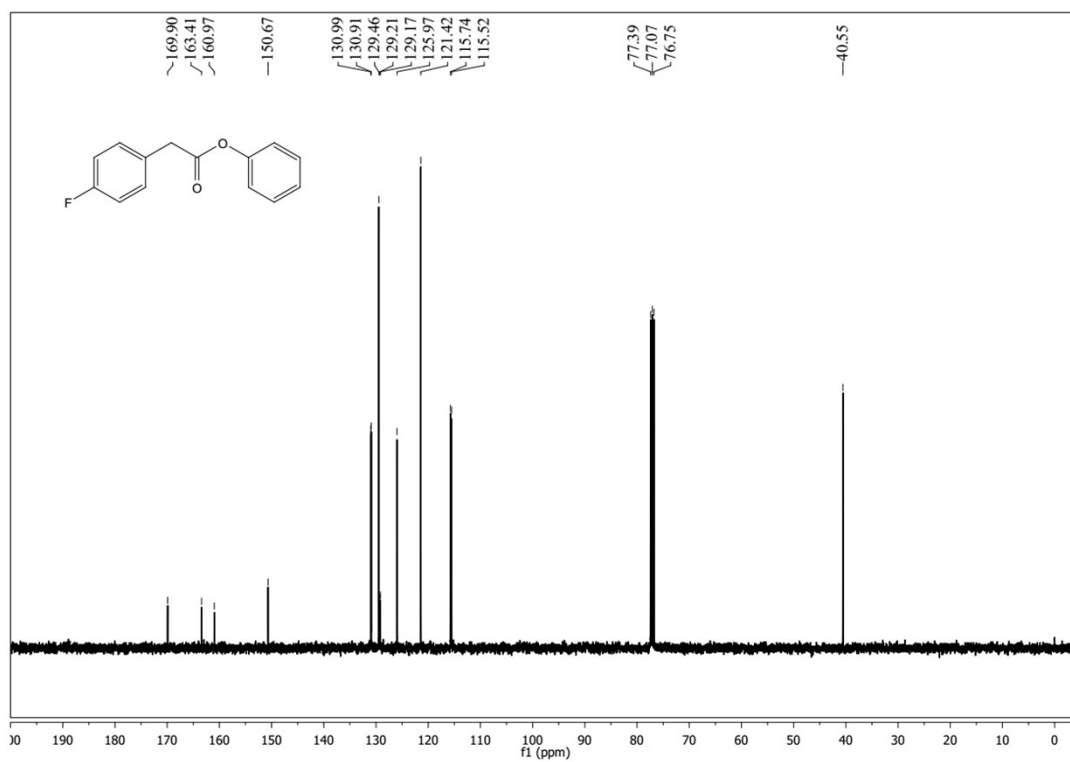

### <sup>1</sup>H NMR Spectra of 7af



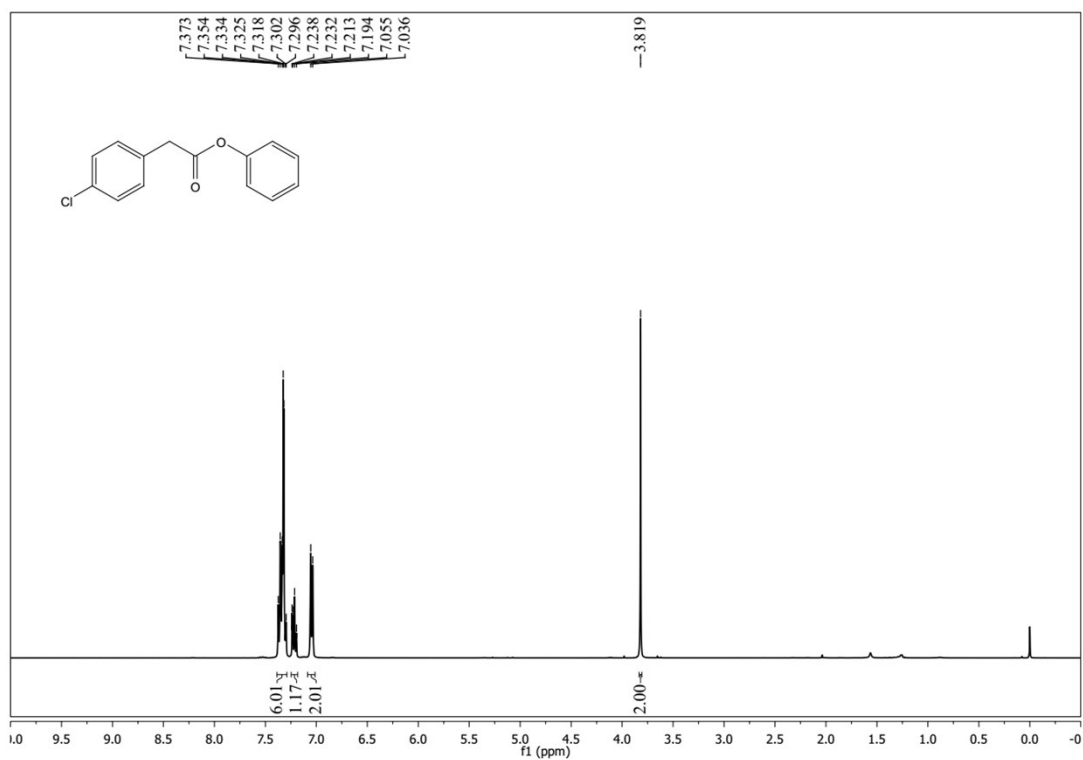

### <sup>13</sup>C NMR Spectra of 7af

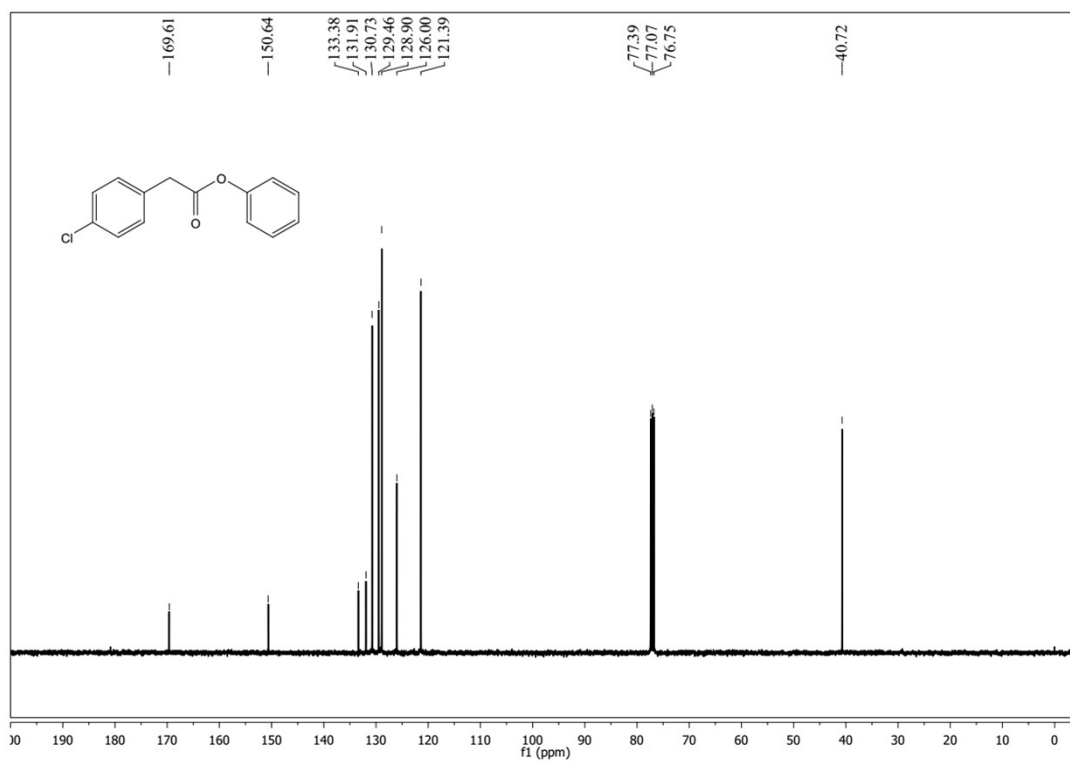

### <sup>1</sup>H NMR Spectra of 7ag

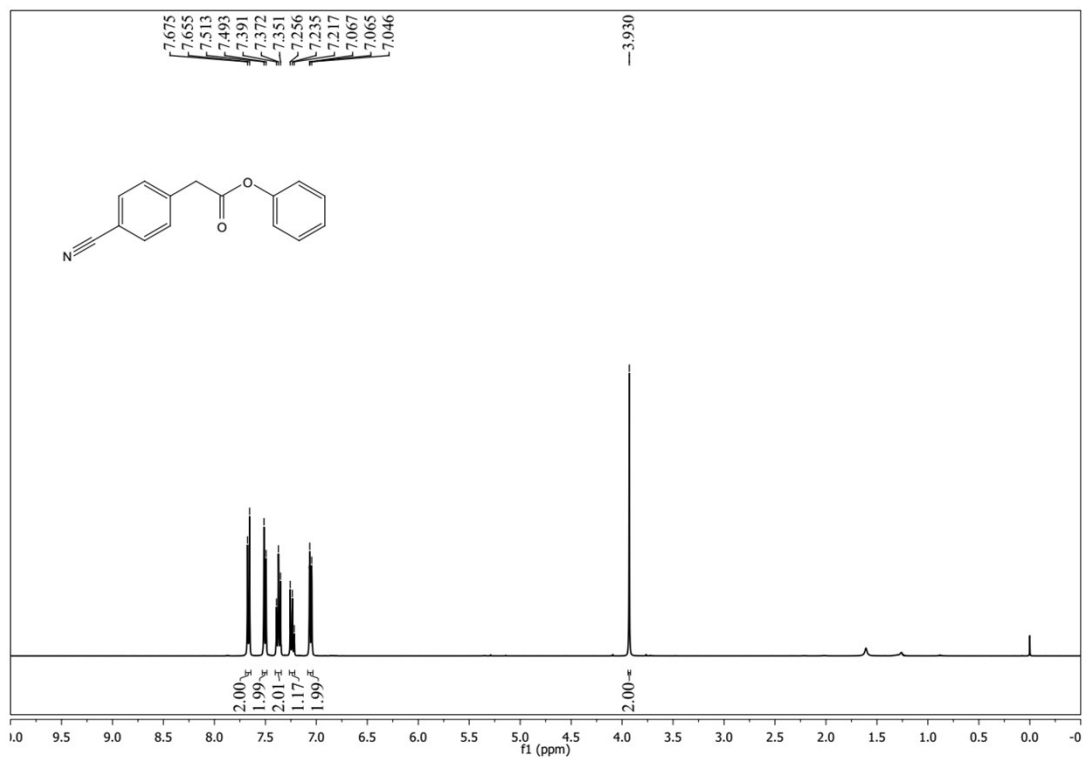

**<sup>13</sup>C NMR Spectra of 7ag**

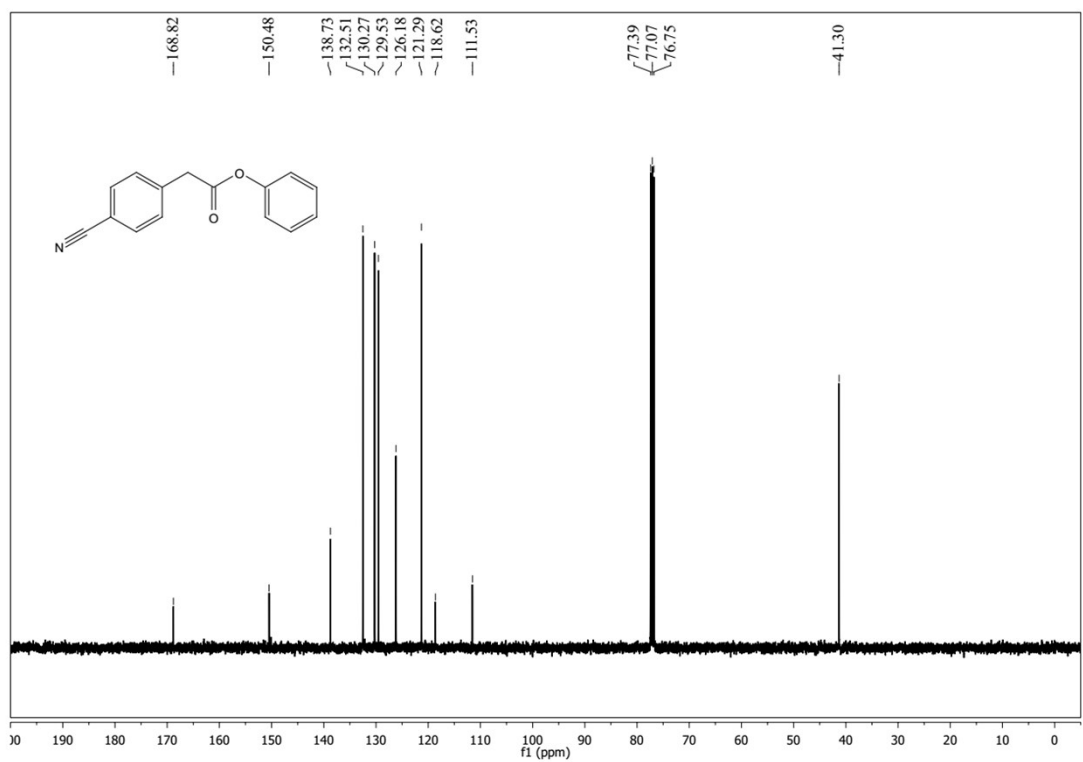

**<sup>1</sup>H NMR Spectra of 7ah**

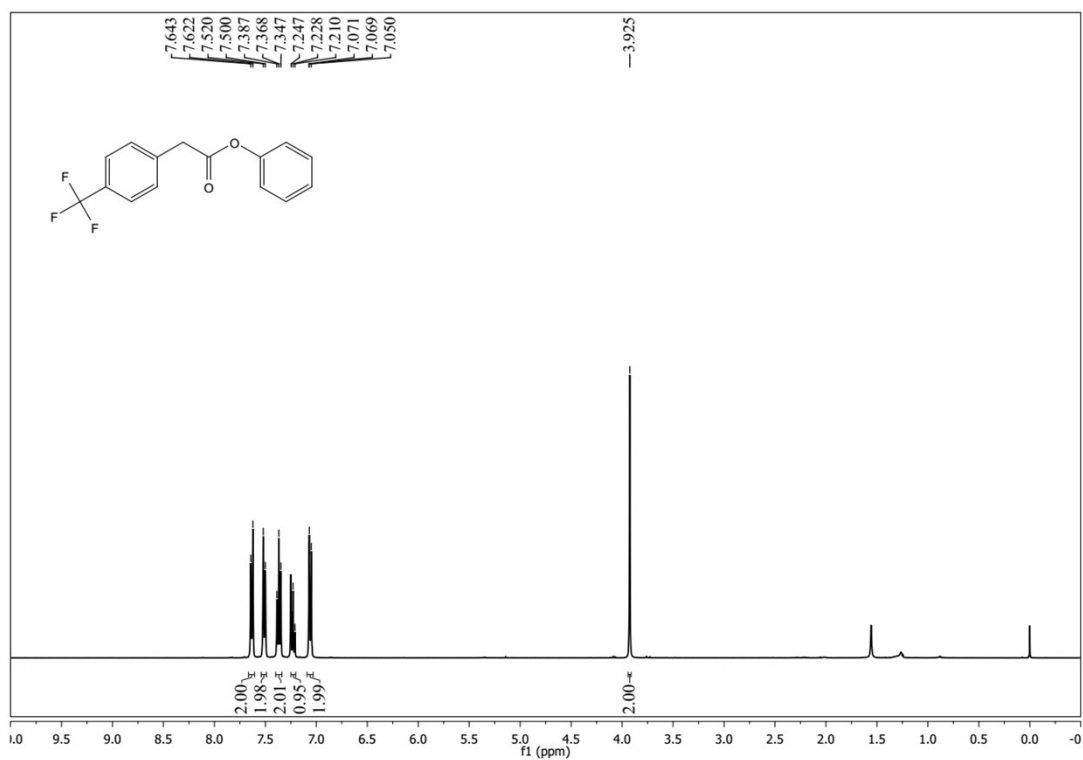

### <sup>13</sup>C NMR Spectra of 7ah

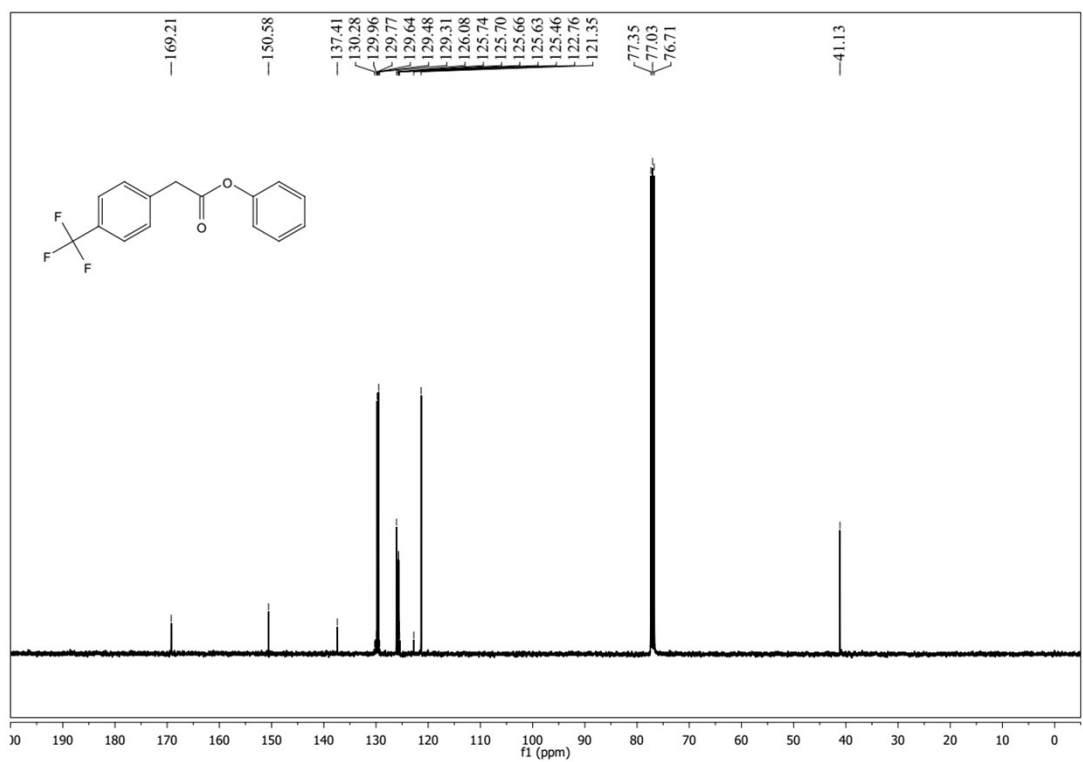

### <sup>1</sup>H NMR Spectra of 7ai

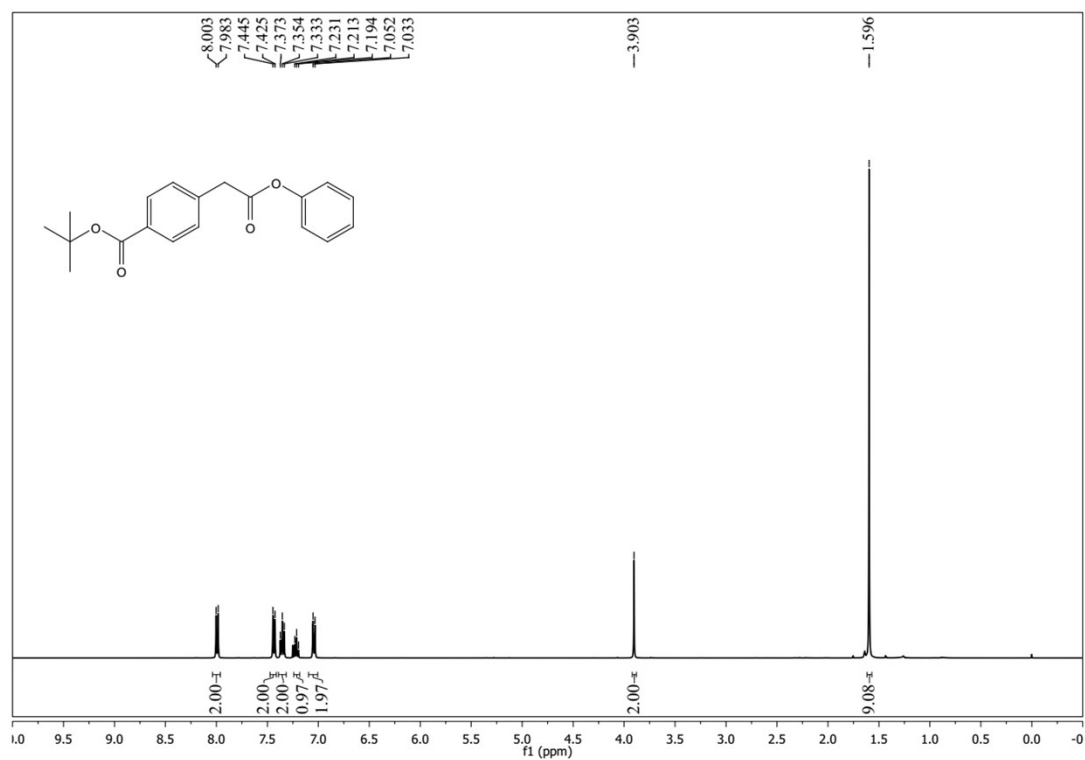

### <sup>13</sup>C NMR Spectra of 7ai

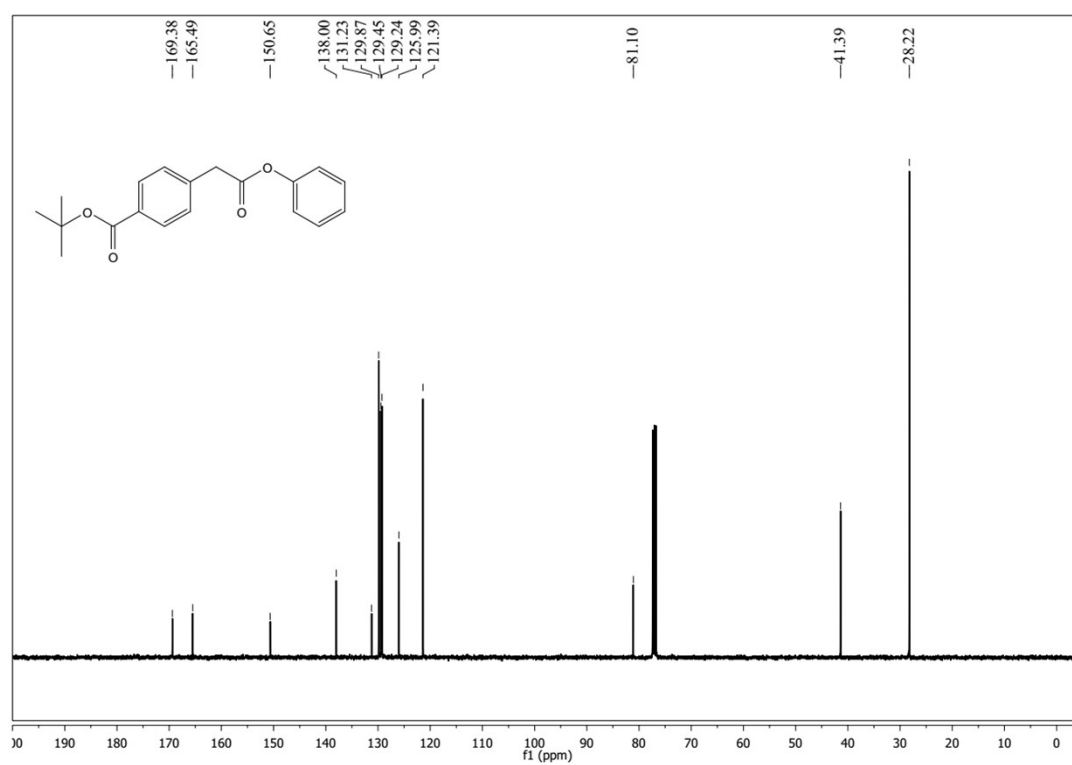

### <sup>1</sup>H NMR Spectra of 7aj

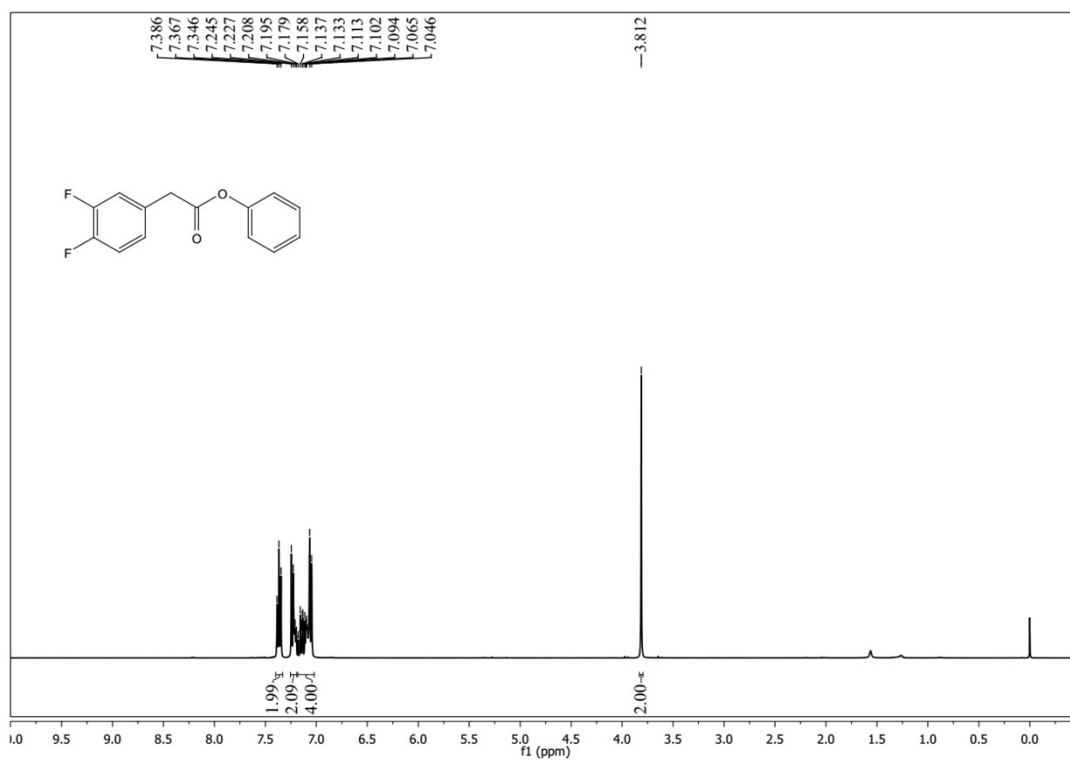

### <sup>13</sup>C NMR Spectra of 7aj

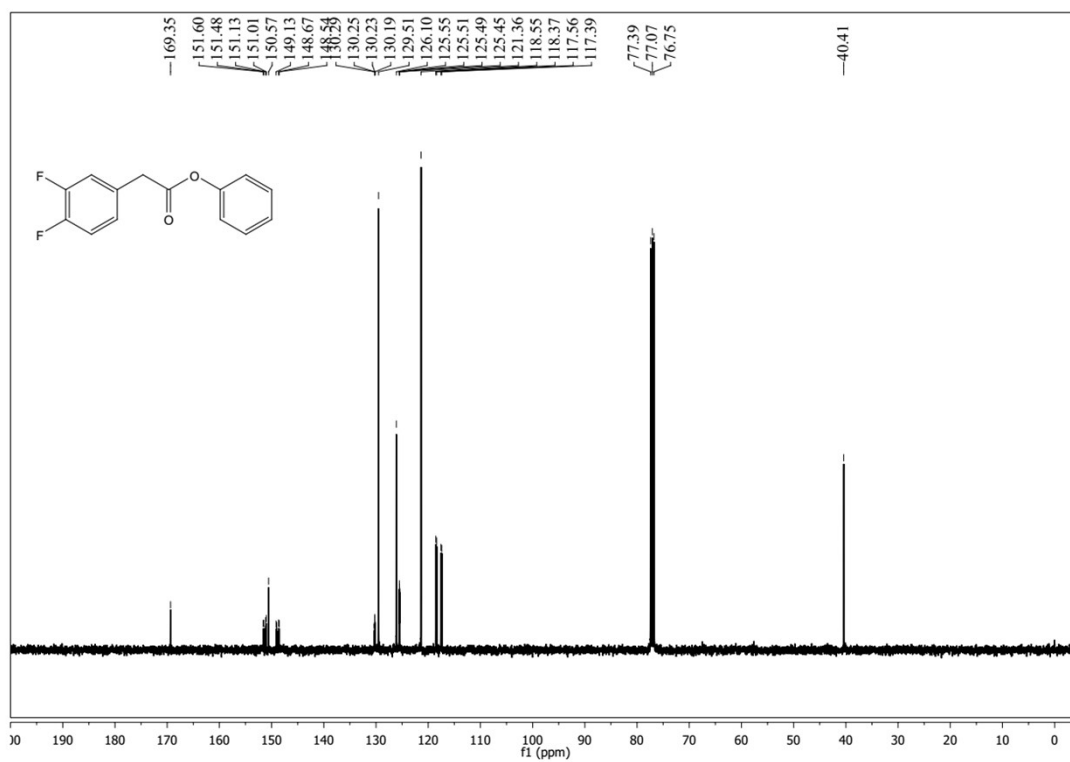

### <sup>1</sup>H NMR Spectra of 7ak

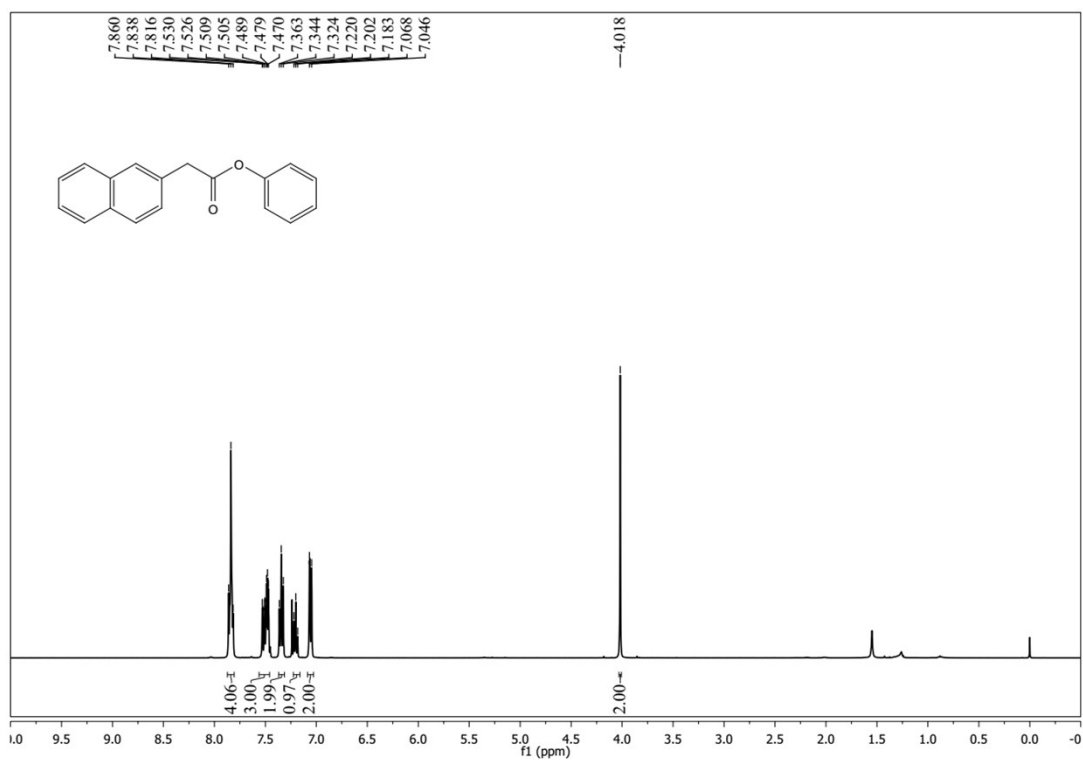

**<sup>13</sup>C NMR Spectra of 7ak**

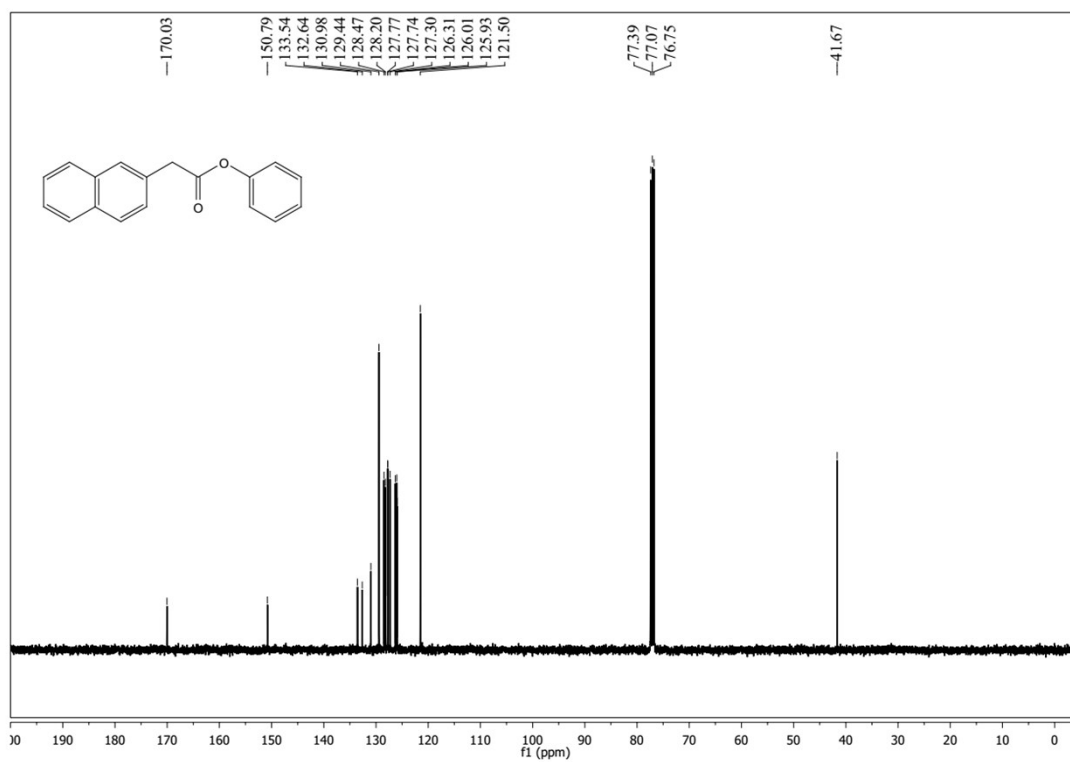

**<sup>1</sup>H NMR Spectra of 7al**

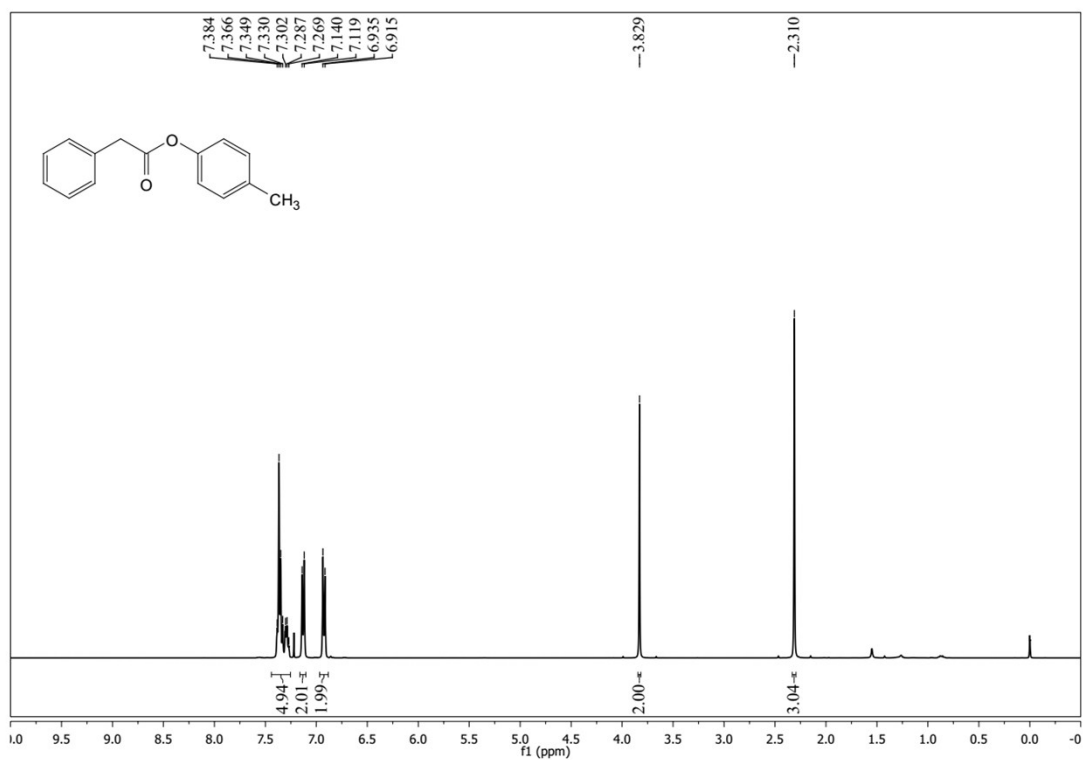

### <sup>13</sup>C NMR Spectra of 7al

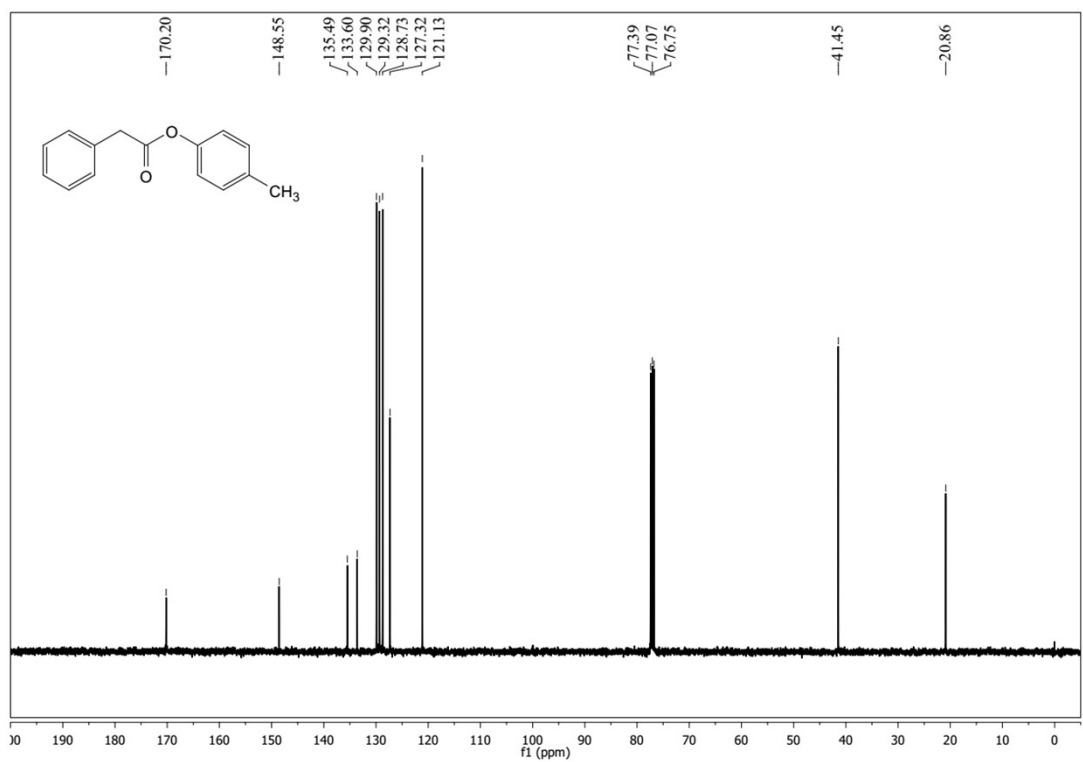

### <sup>1</sup>H NMR Spectra of 7am

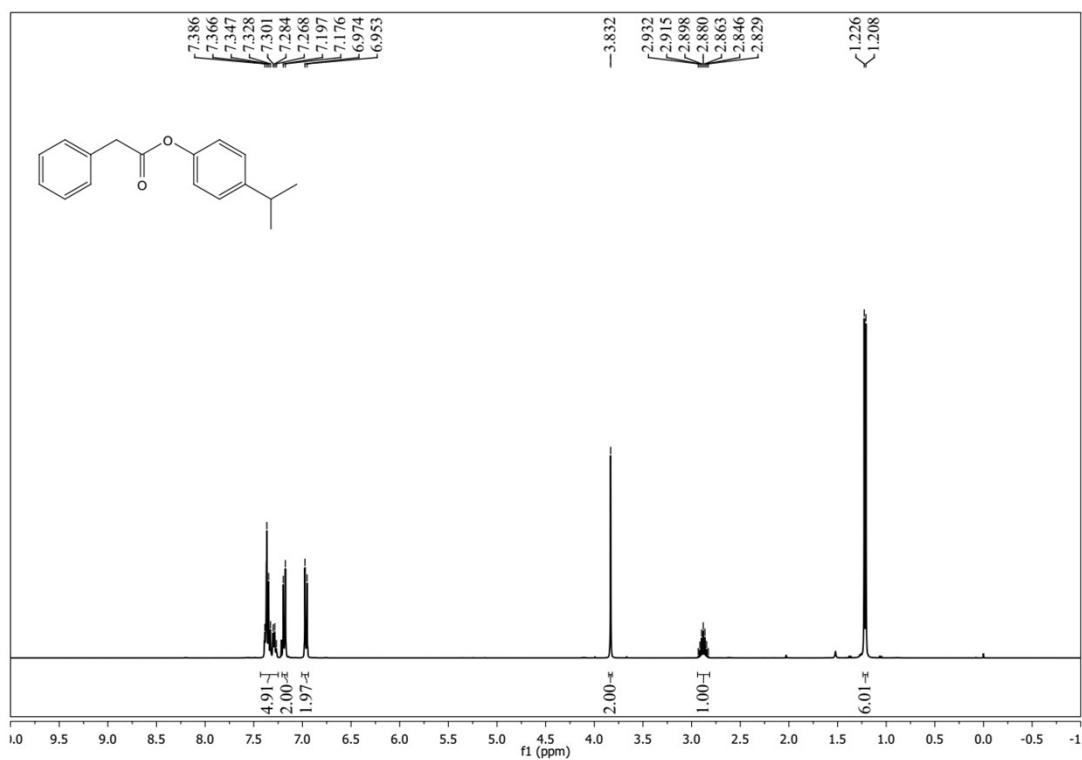

### <sup>13</sup>C NMR Spectra of 7am

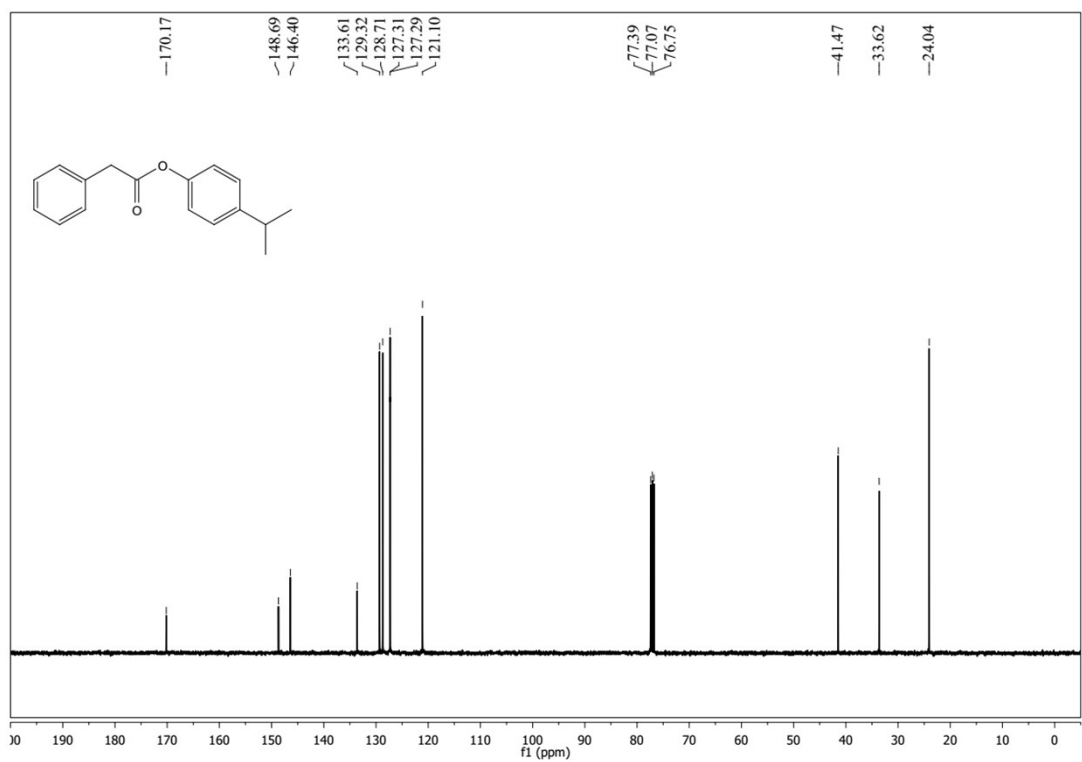

### <sup>1</sup>H NMR Spectra of 7an



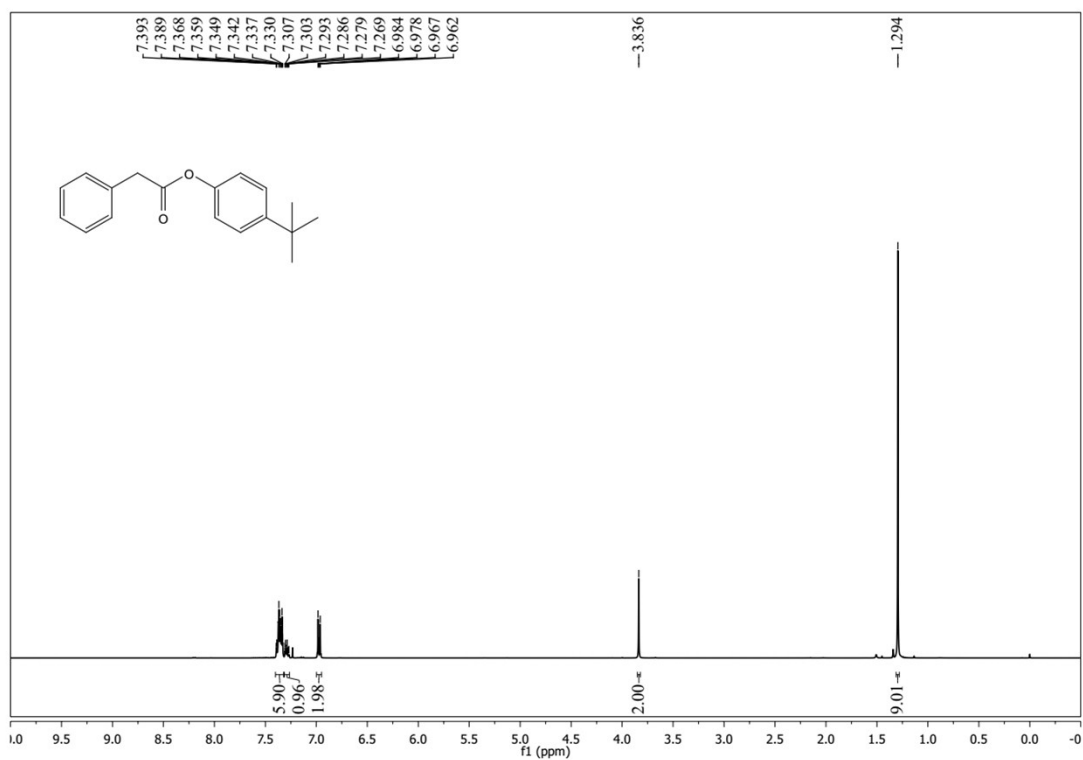

### <sup>13</sup>C NMR Spectra of 7an

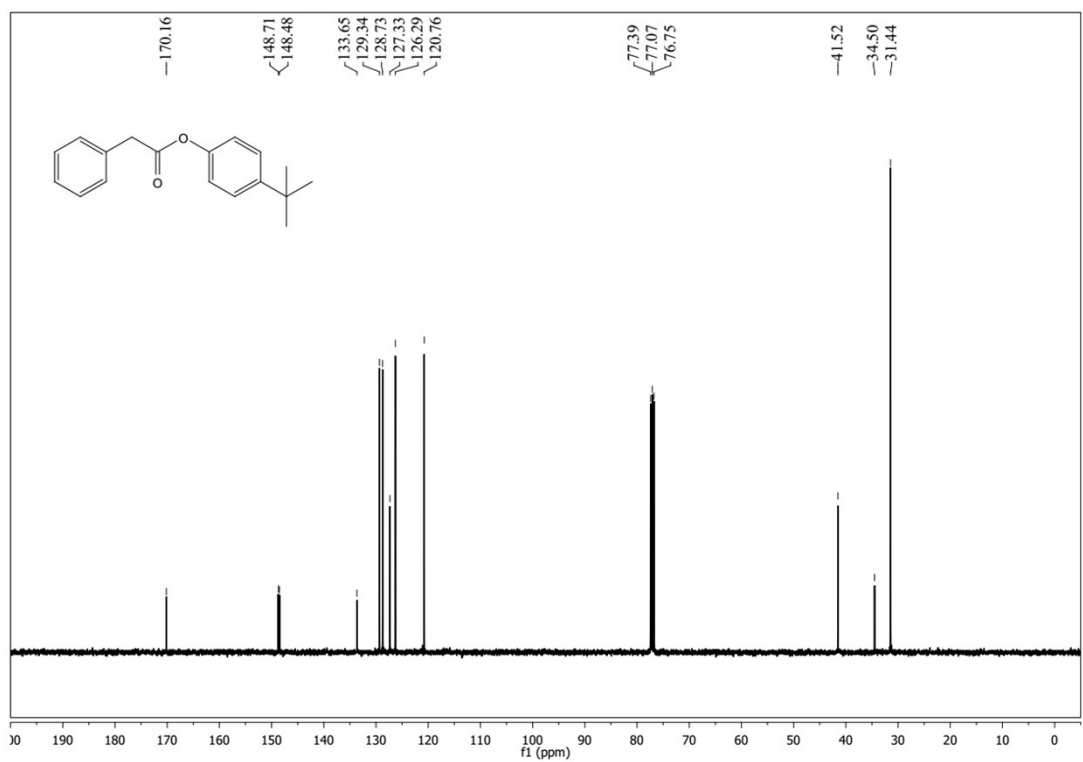

### <sup>1</sup>H NMR Spectra of 7ao

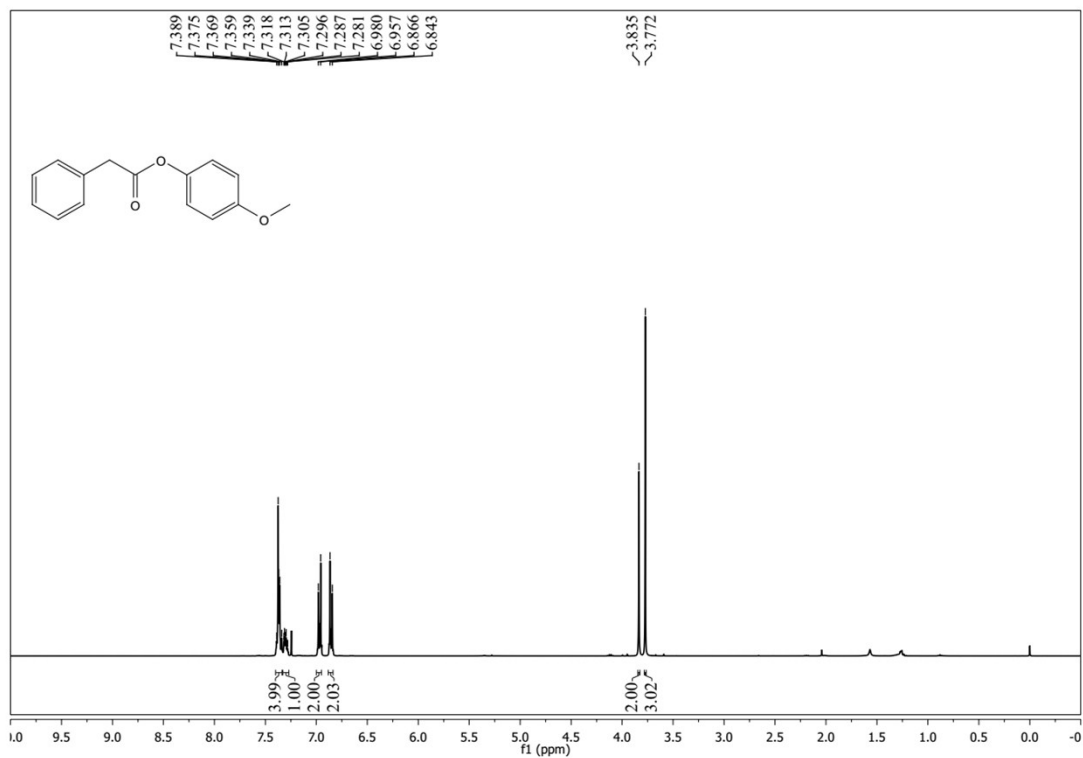

**<sup>13</sup>C NMR Spectra of 7ao**

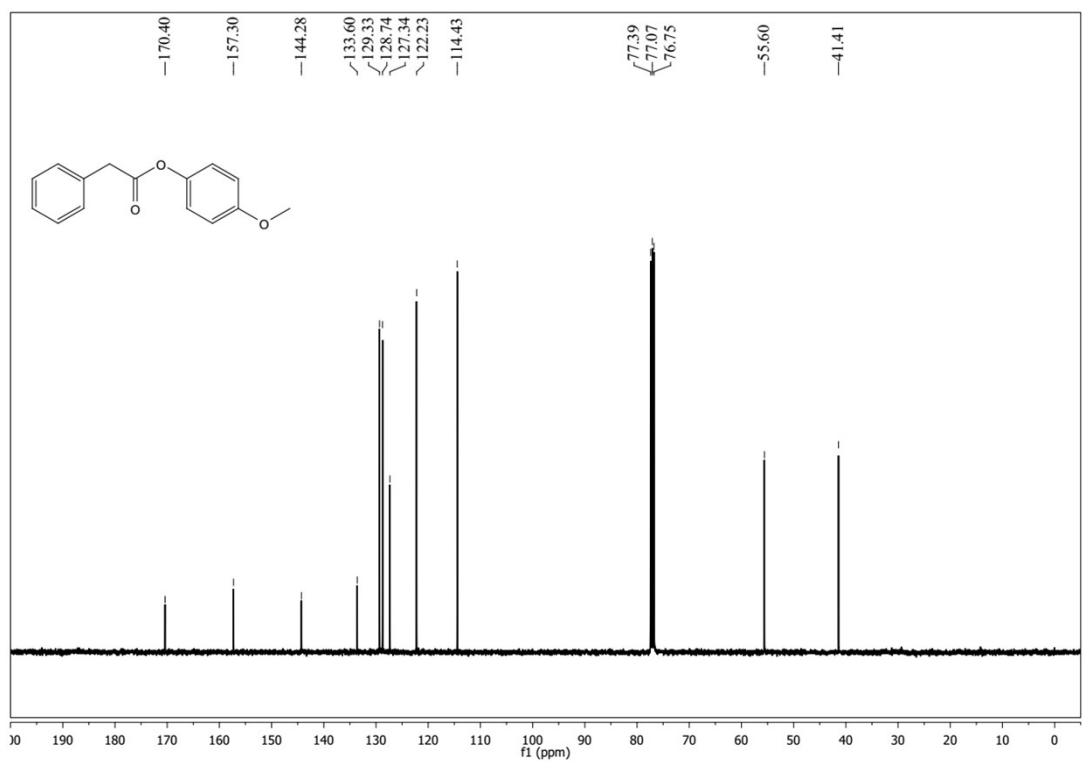

**<sup>1</sup>H NMR Spectra of 7ap**

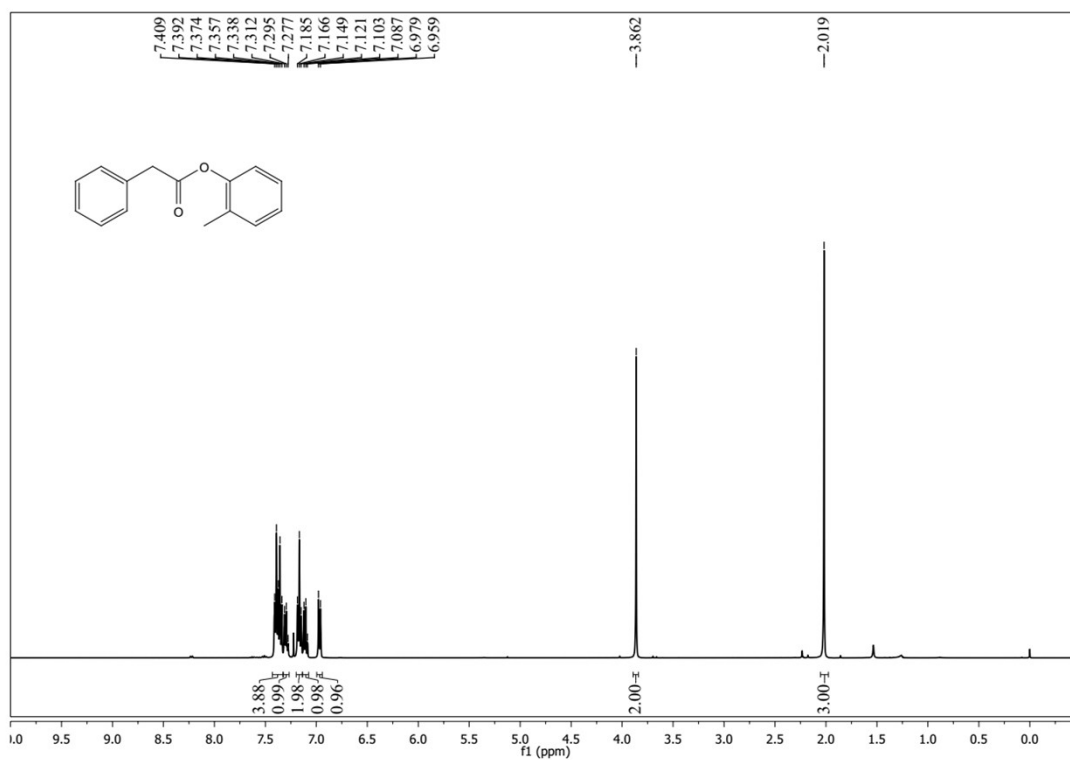

### <sup>13</sup>C NMR Spectra of 7ap

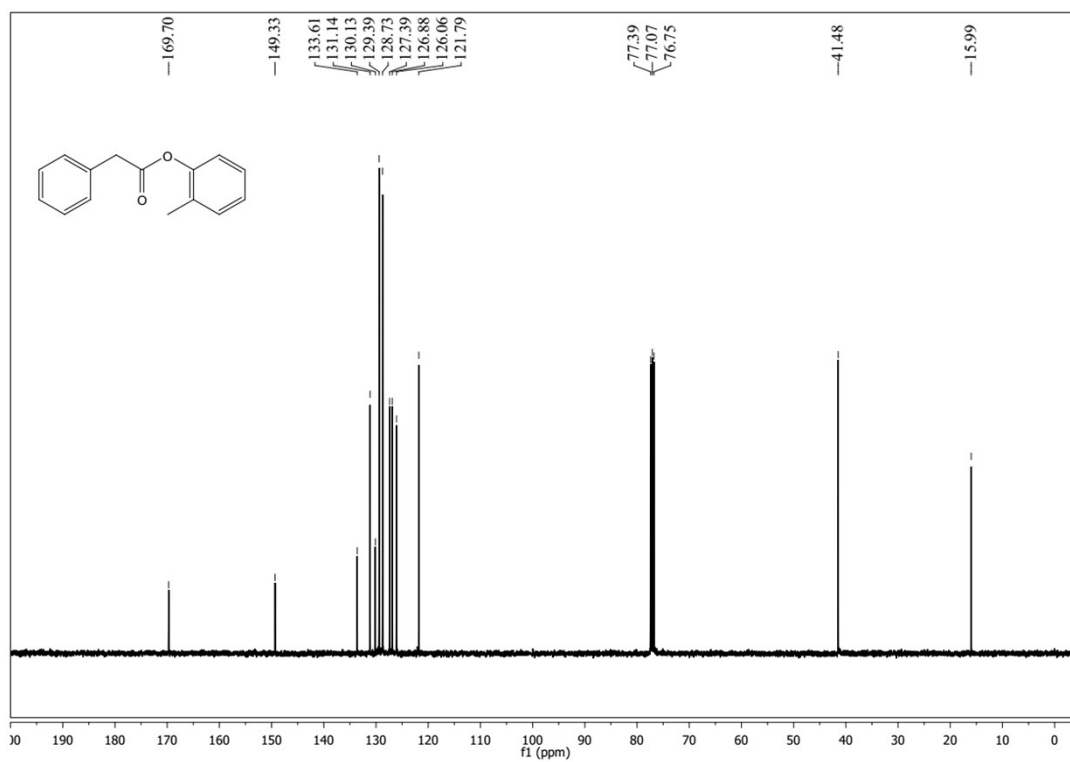

### <sup>1</sup>H NMR Spectra of 7aq

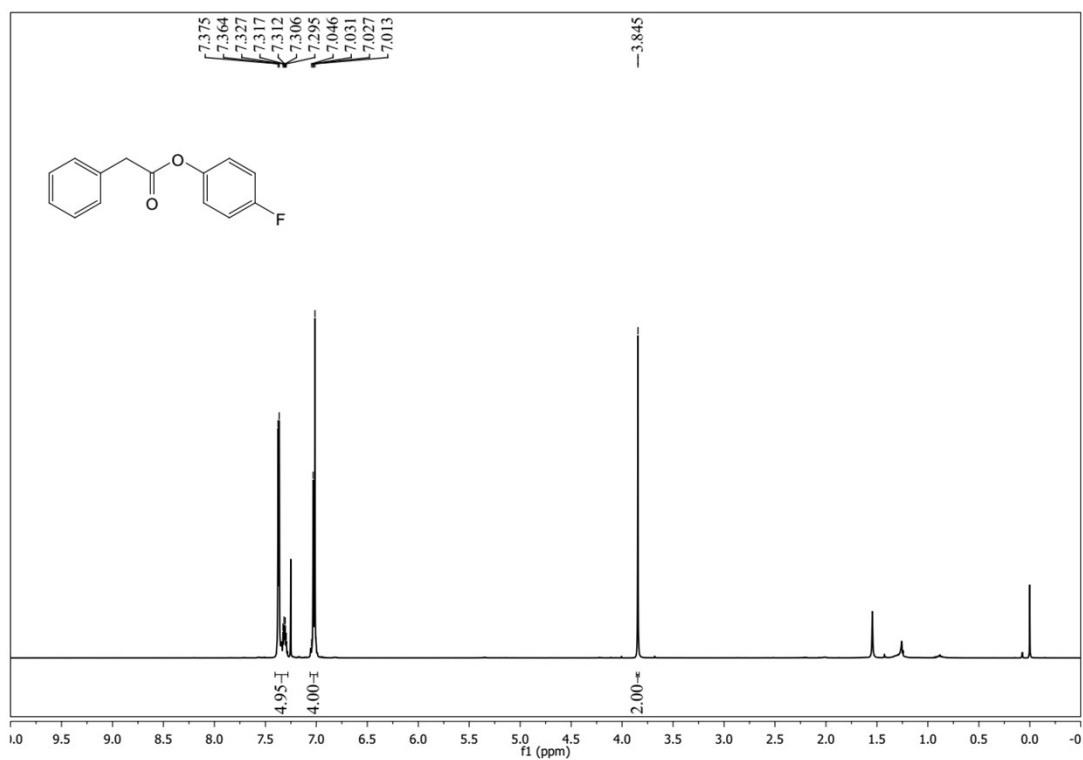

### <sup>13</sup>C NMR Spectra of 7aq

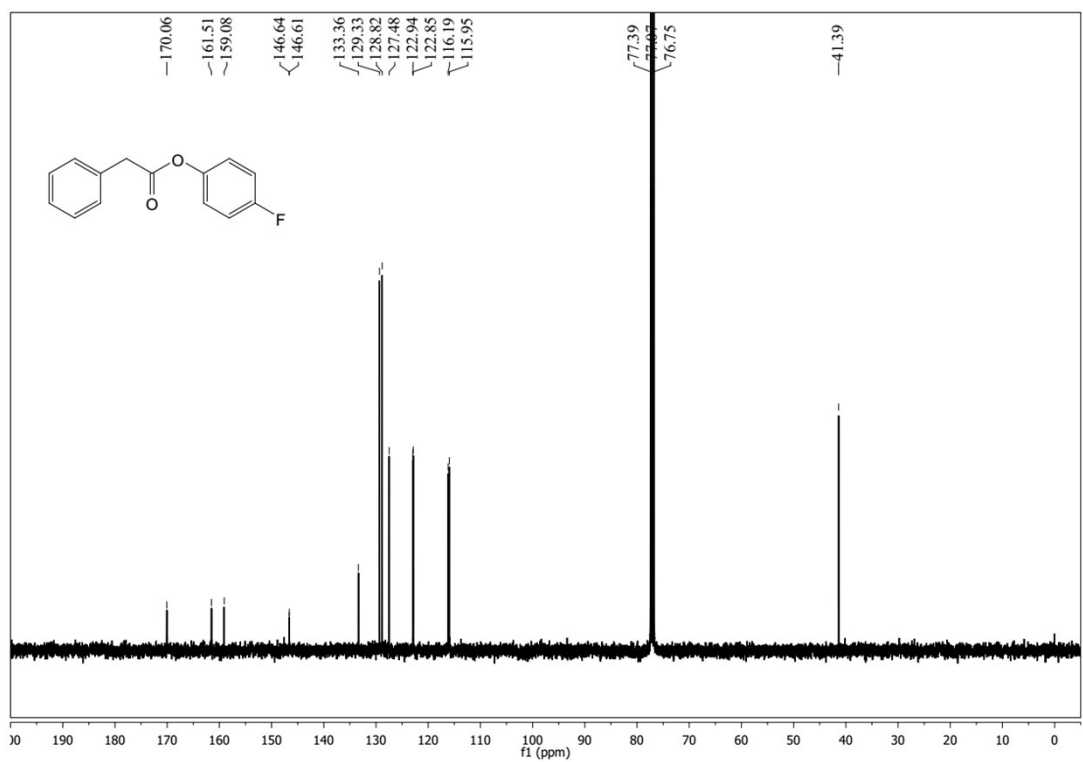

### <sup>1</sup>H NMR Spectra of 7ar

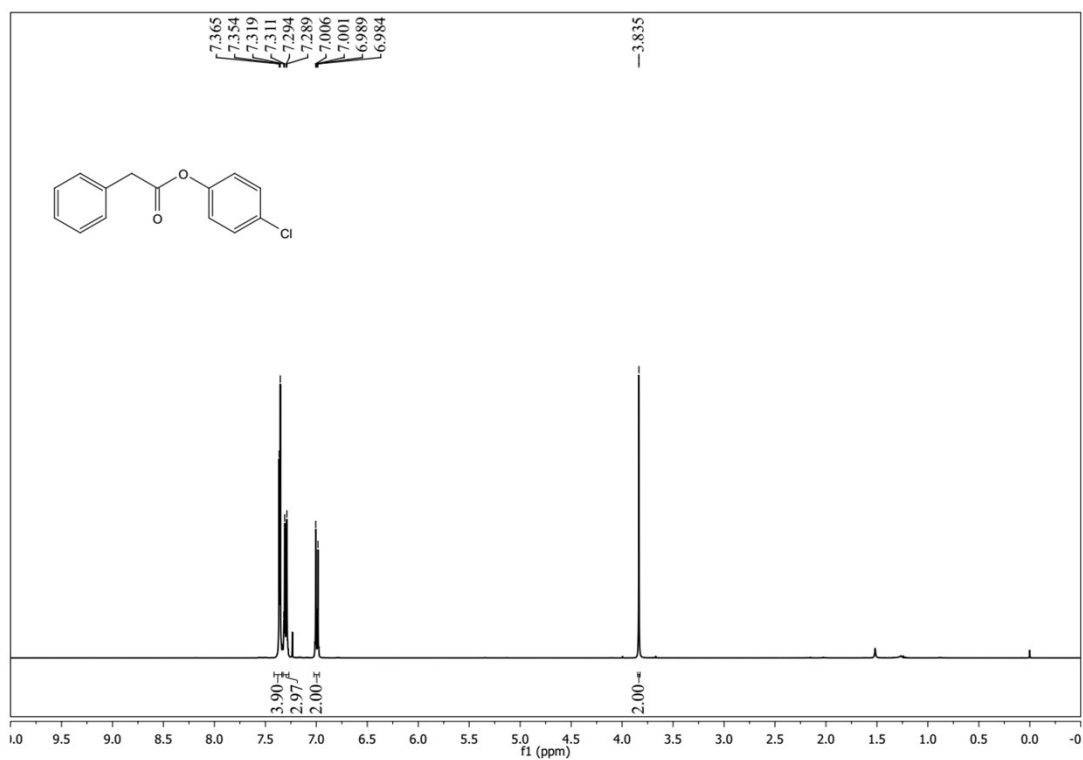

### <sup>13</sup>C NMR Spectra of 7ar

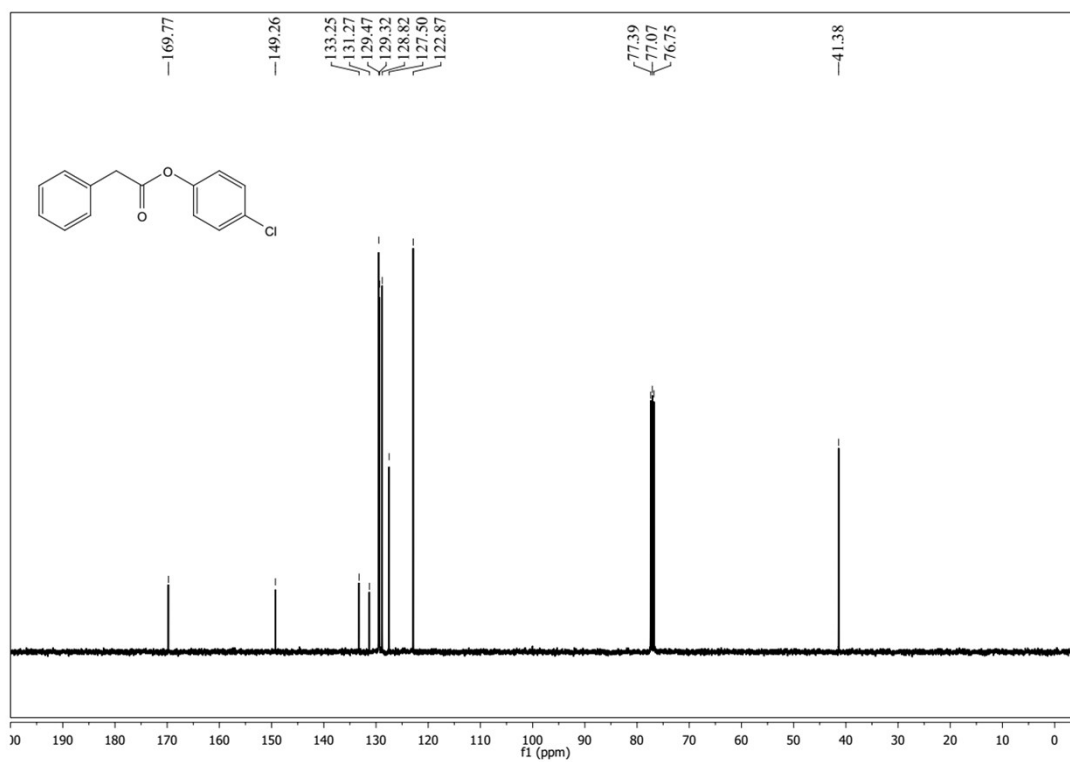

### <sup>1</sup>H NMR Spectra of 7as

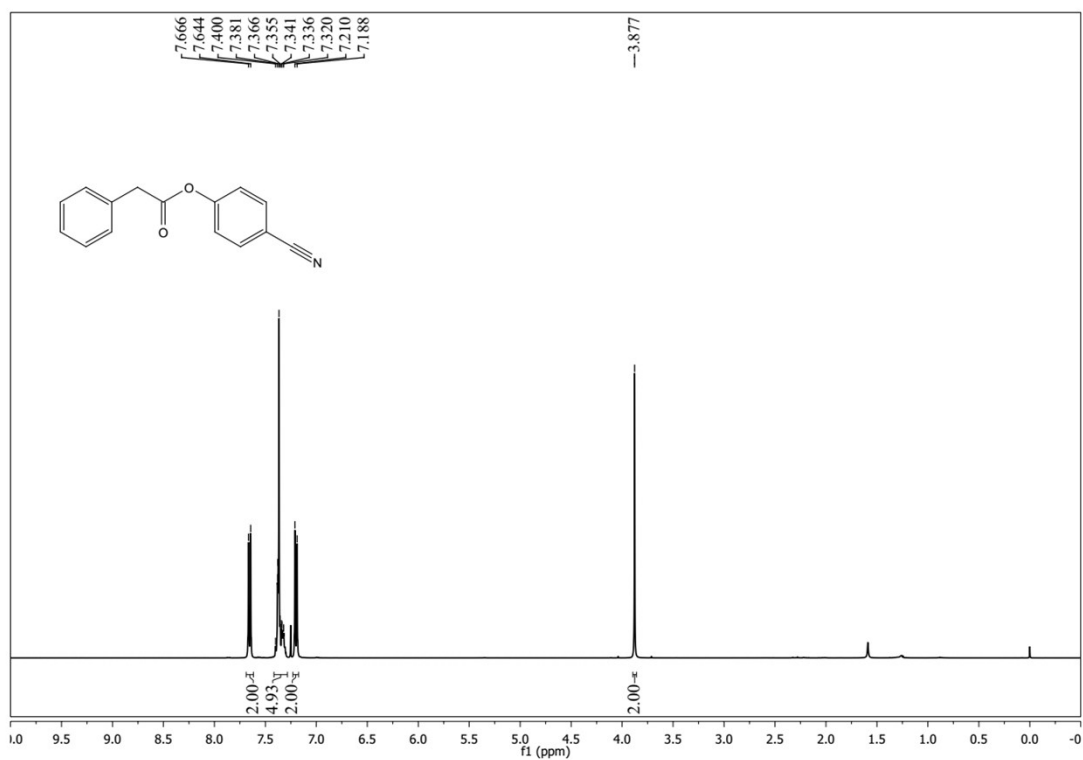

### <sup>13</sup>C NMR Spectra of 7as

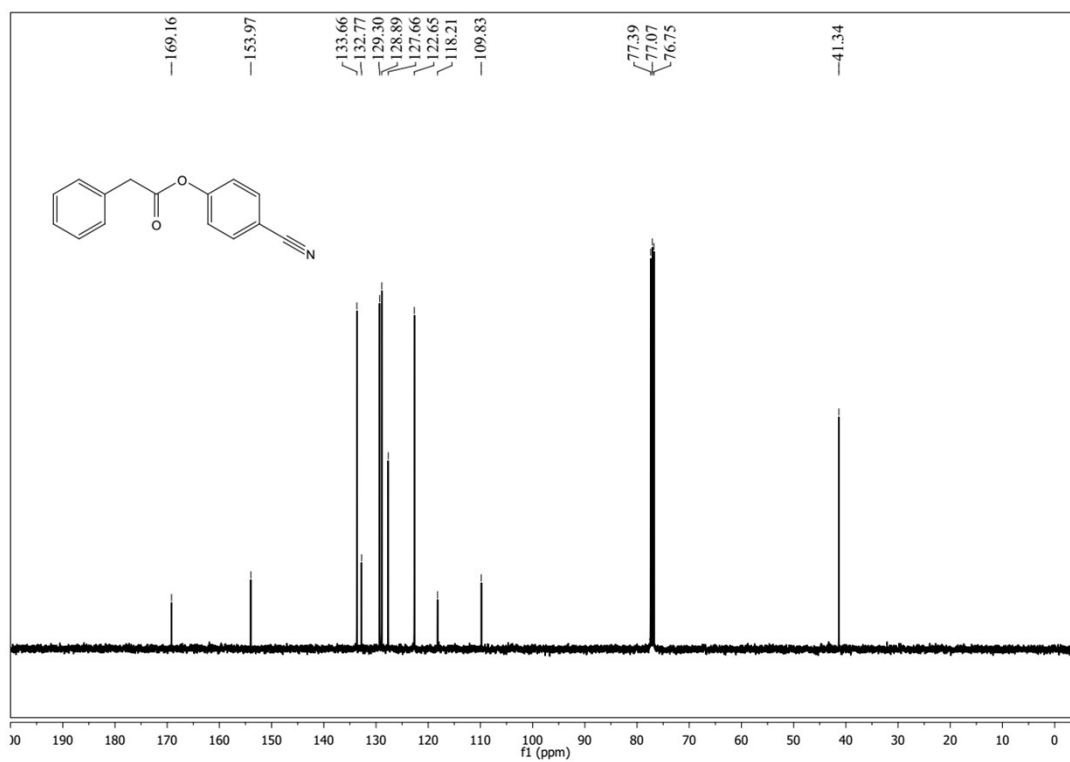

### <sup>1</sup>H NMR Spectra of 7at

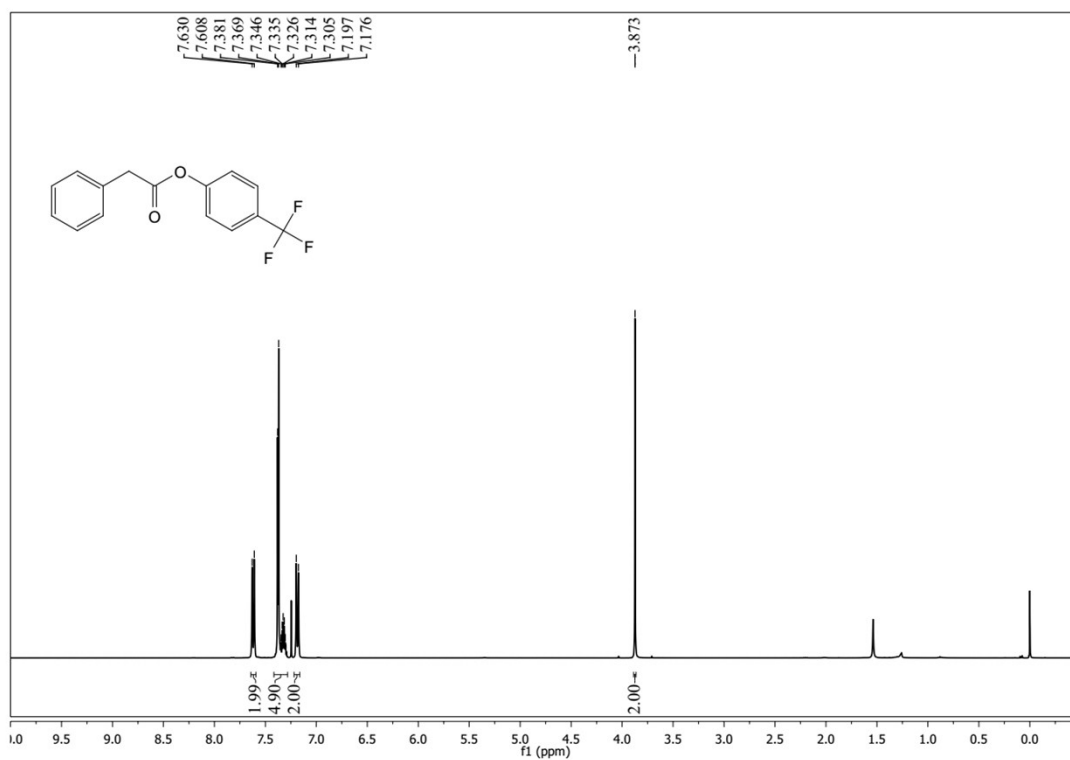

### <sup>13</sup>C NMR Spectra of 7at

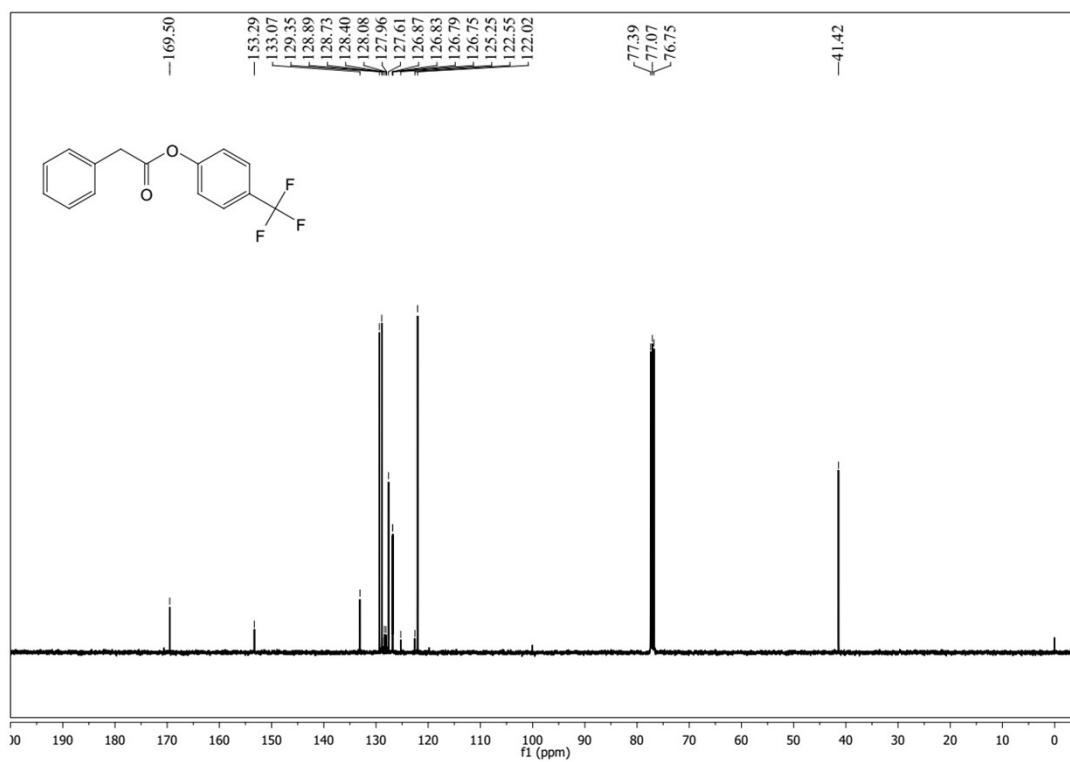

### <sup>1</sup>H NMR Spectra of 7au

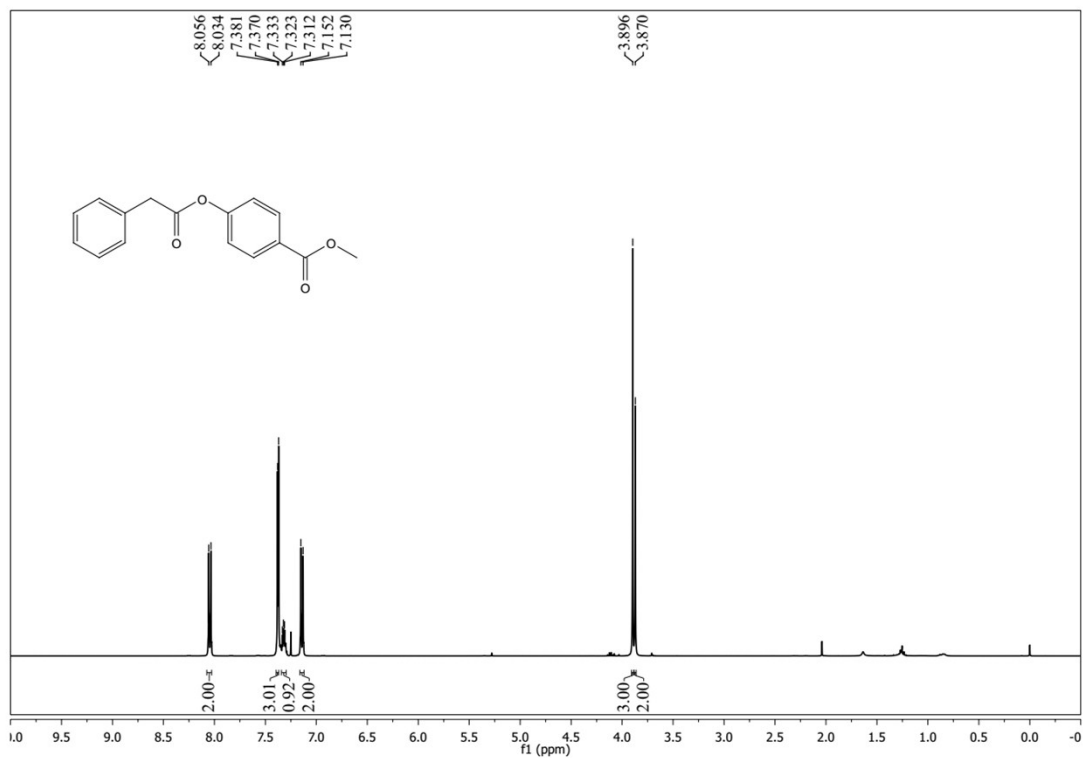

**<sup>13</sup>C NMR Spectra of 7au**

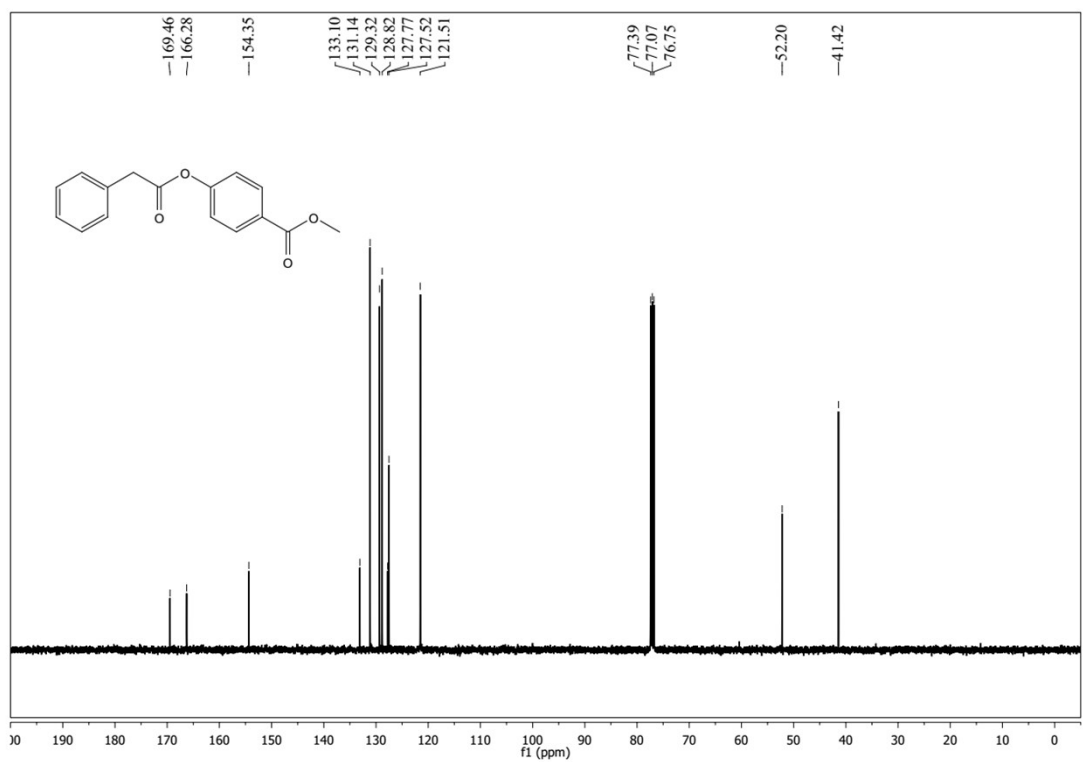



### <sup>1</sup>H NMR Spectra of 7av

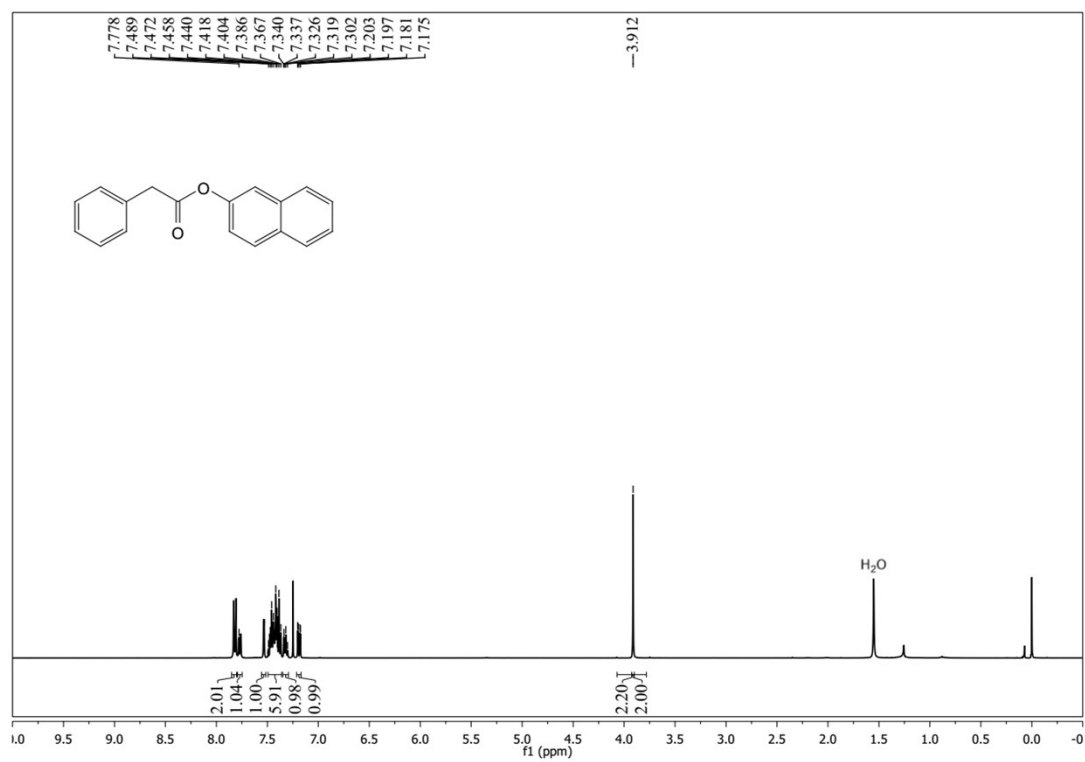

### <sup>13</sup>C NMR Spectra of 7av

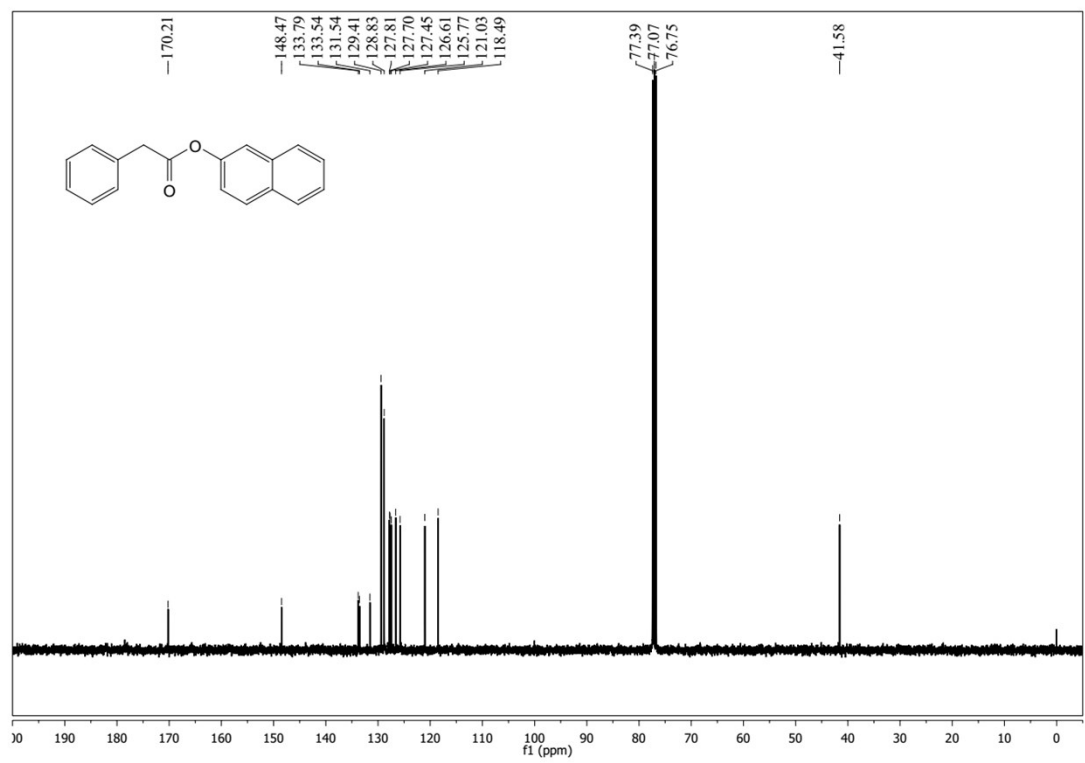

### <sup>1</sup>H NMR Spectra of 7aw

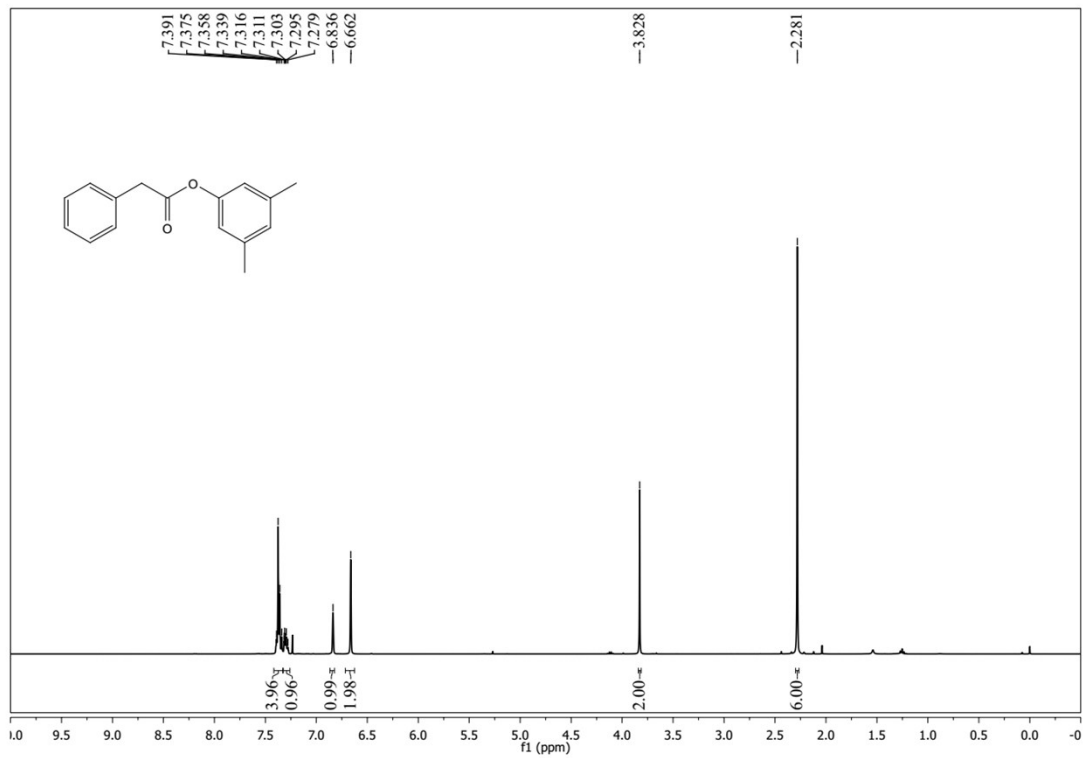

### <sup>13</sup>C NMR Spectra of 7aw

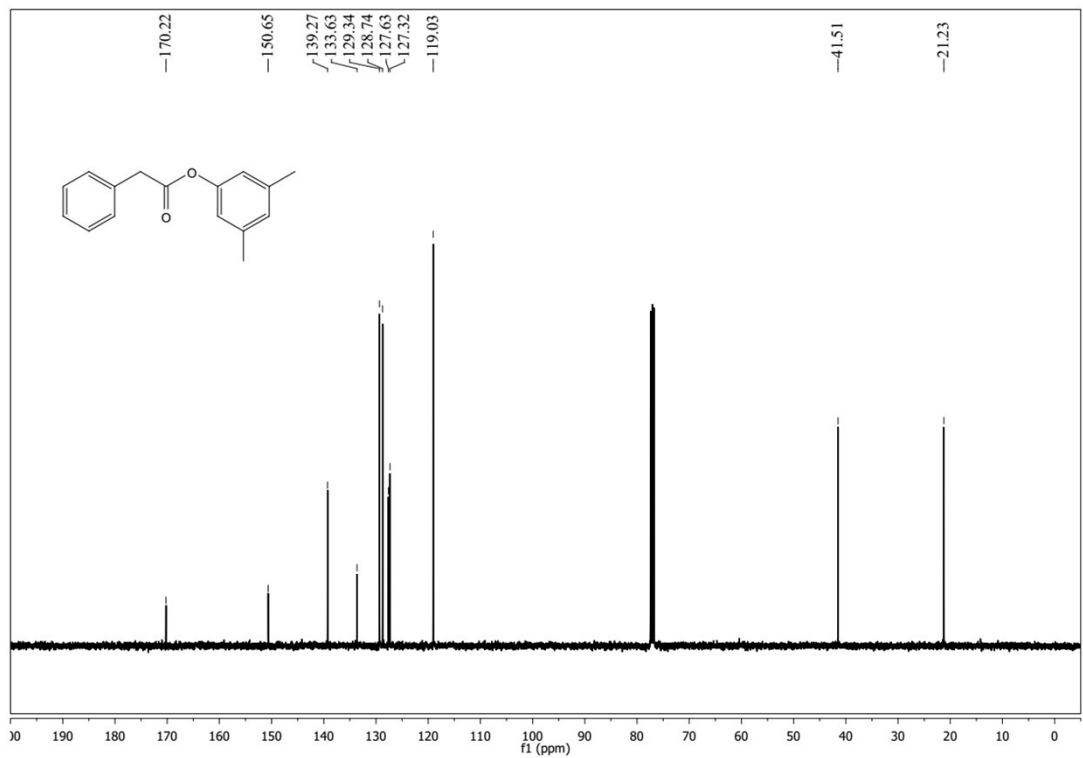

### <sup>1</sup>H NMR Spectra of 7ax

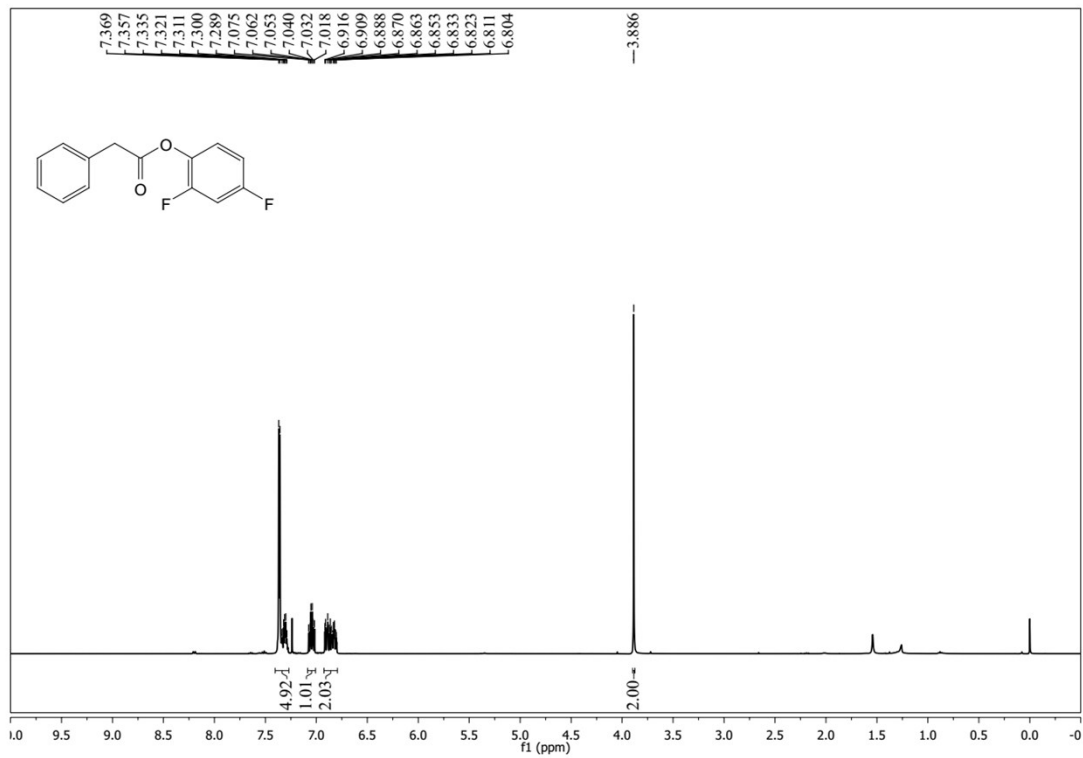

### <sup>13</sup>C NMR Spectra of 7ax

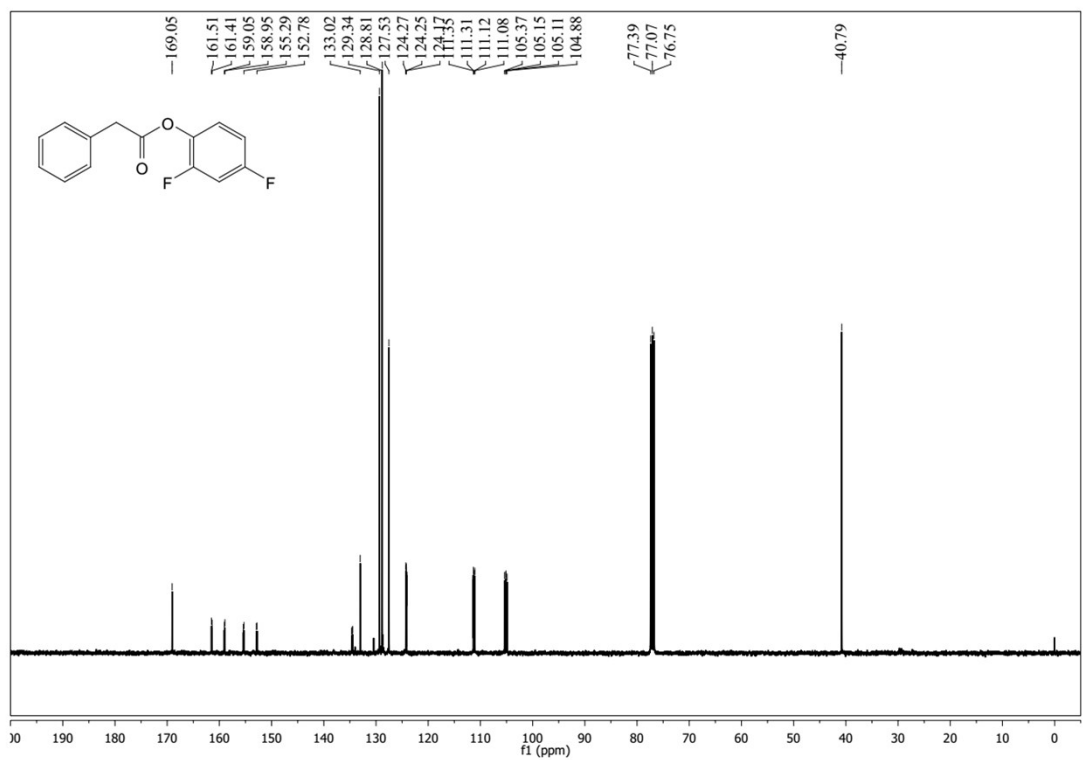

### <sup>1</sup>H NMR Spectra of 7ay

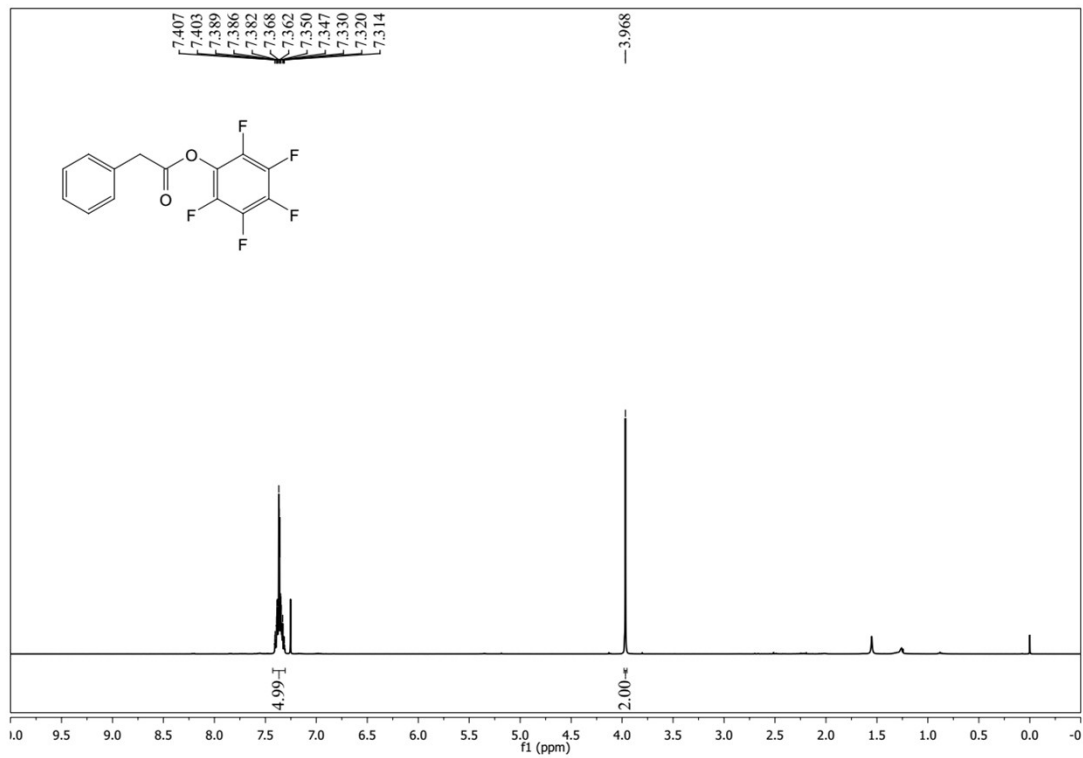

### <sup>13</sup>C NMR Spectra of 7ay

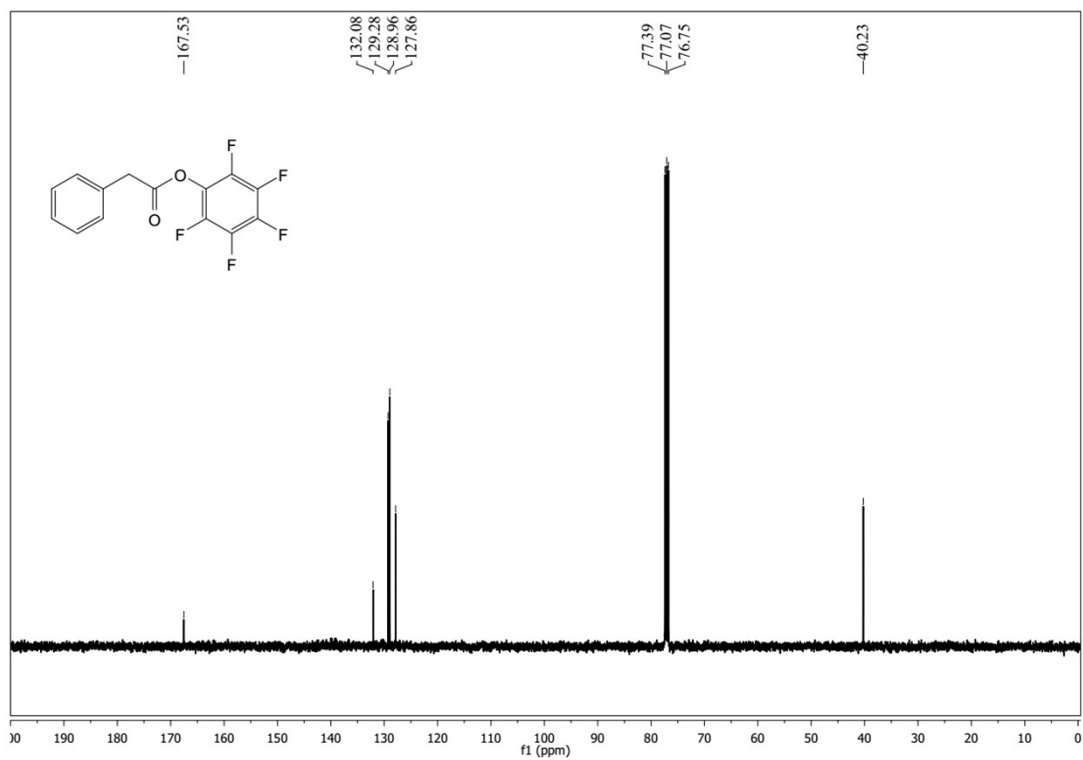

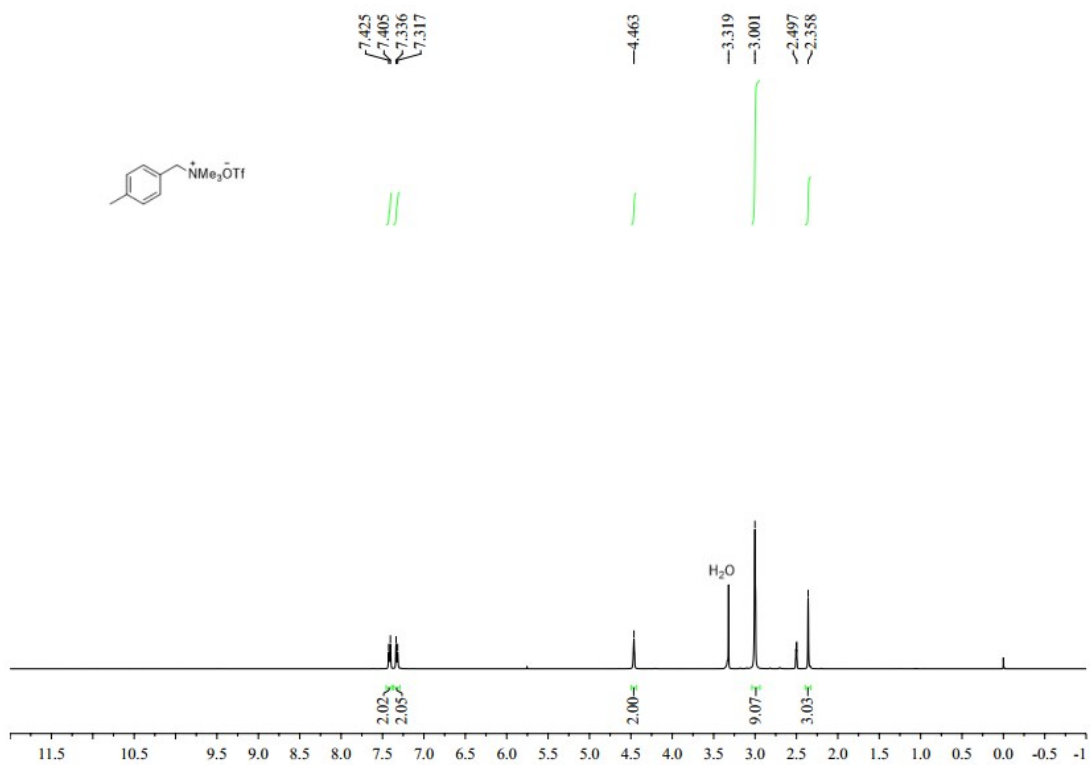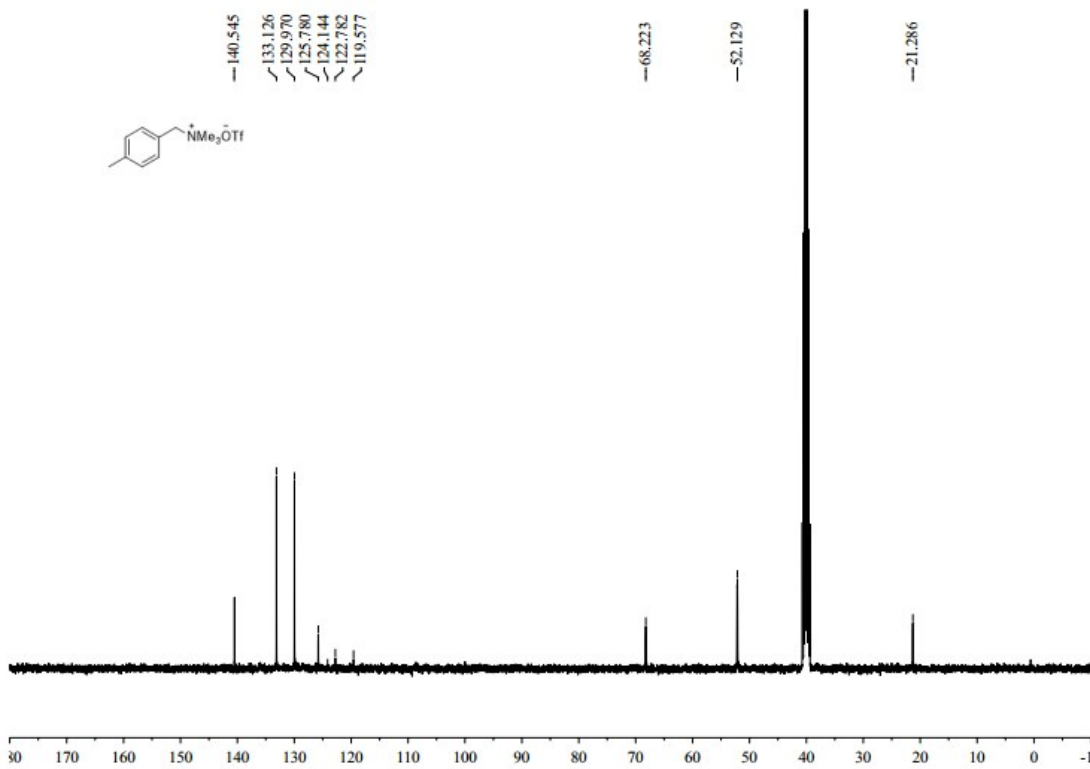

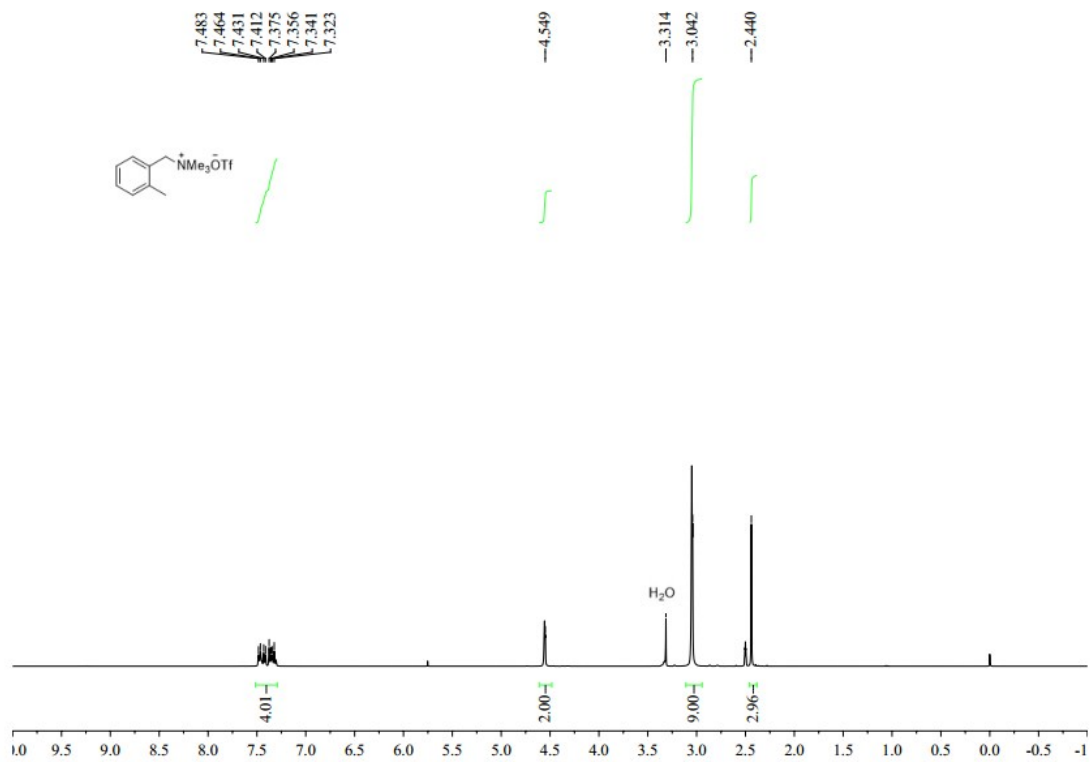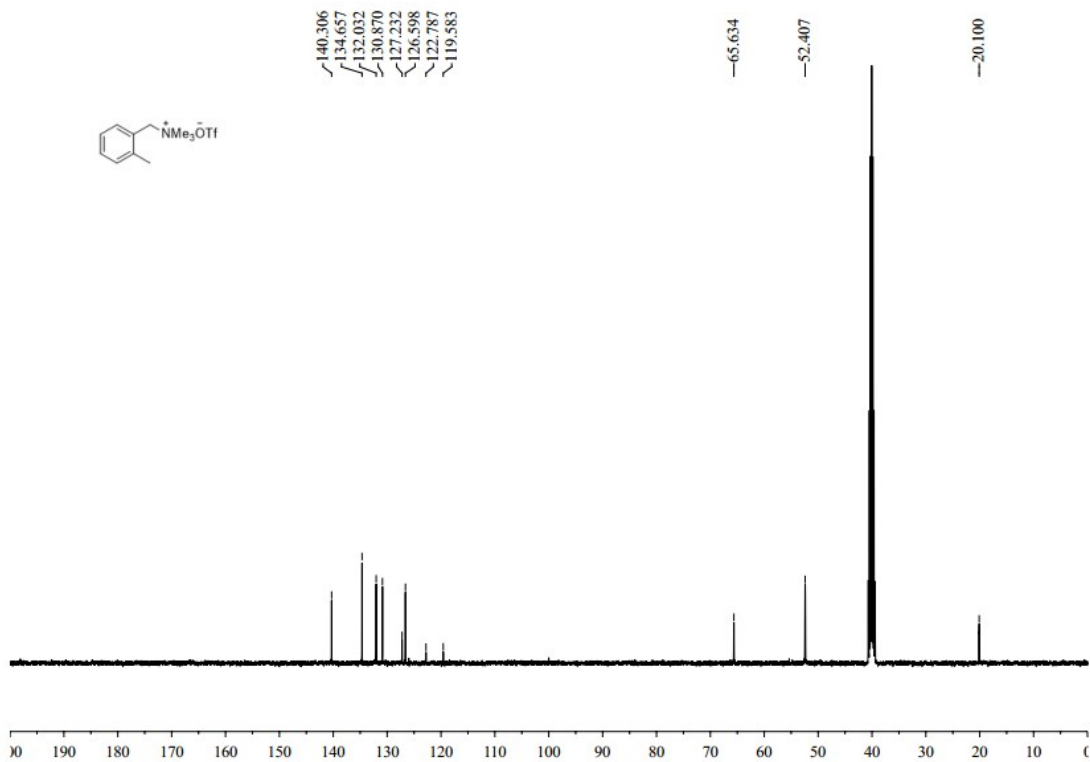

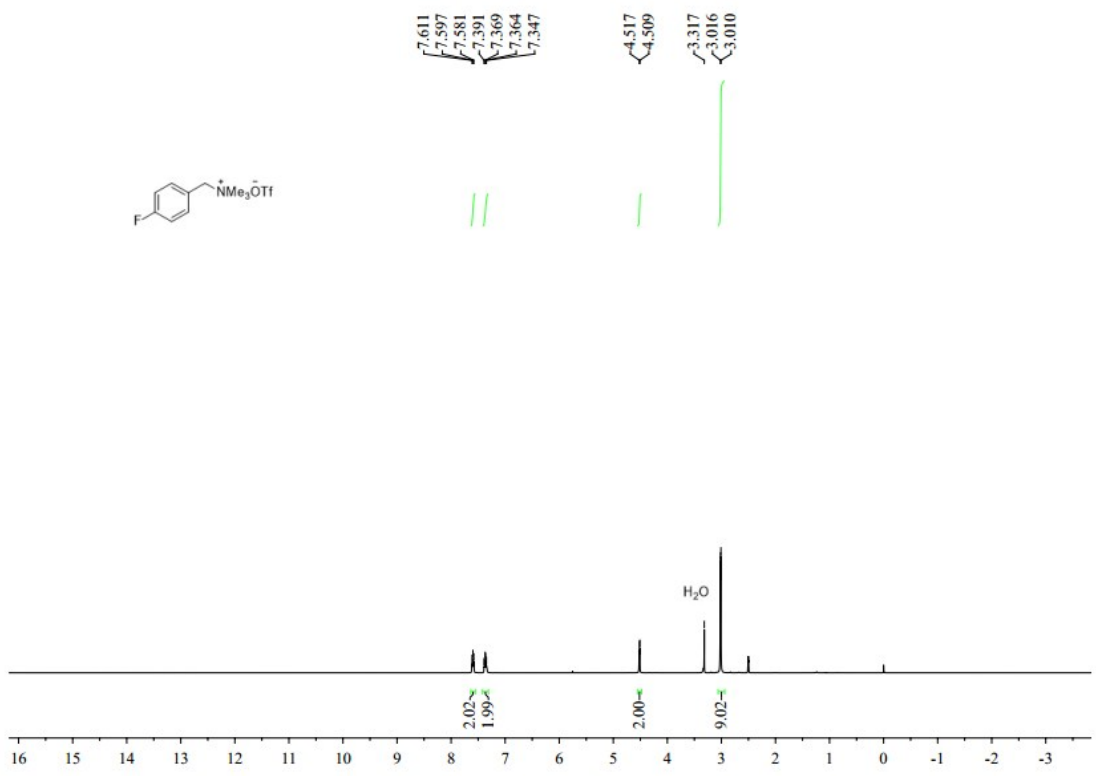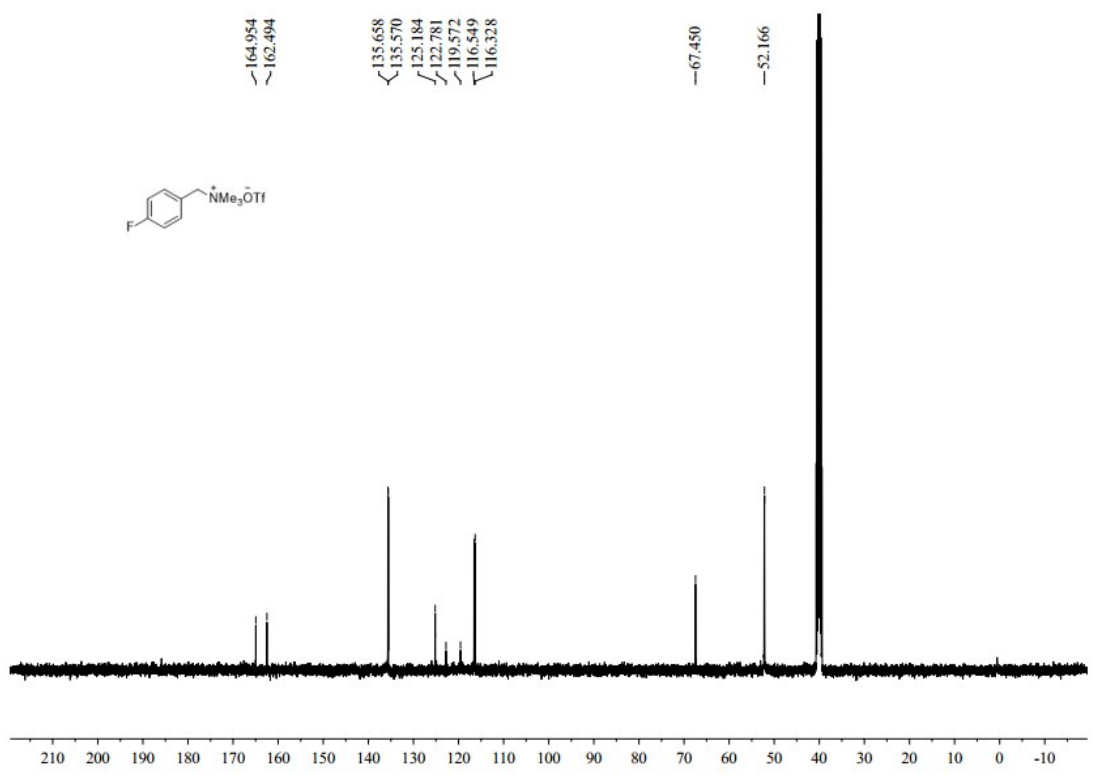

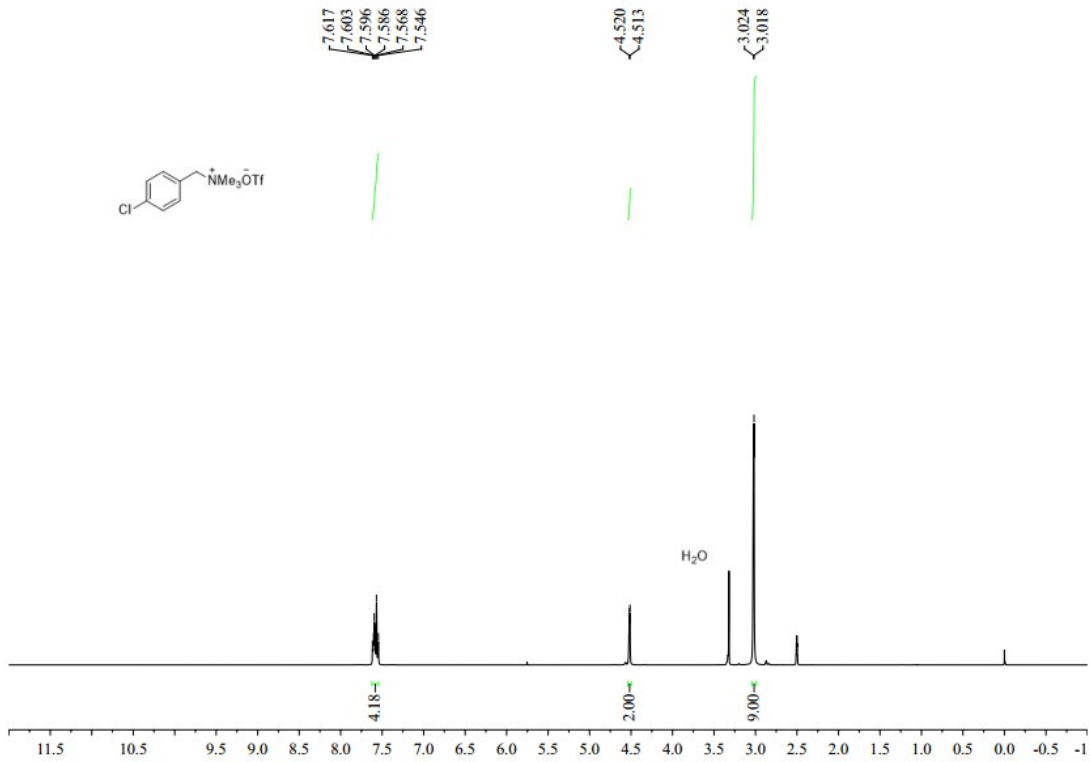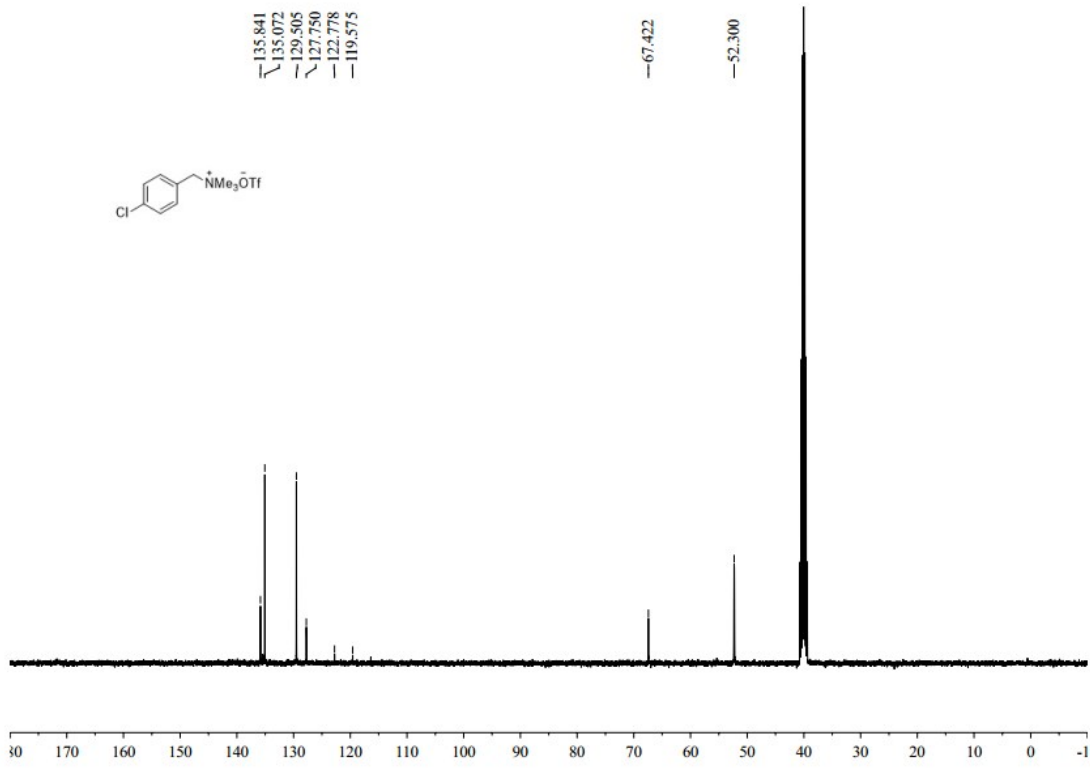



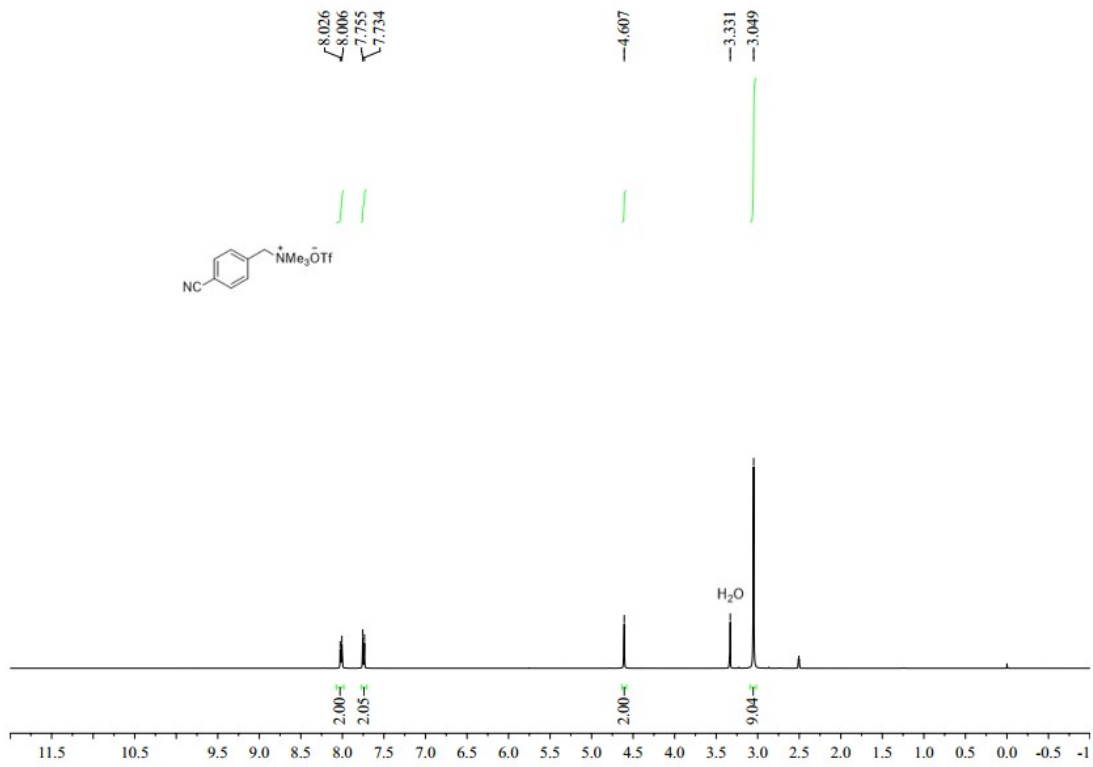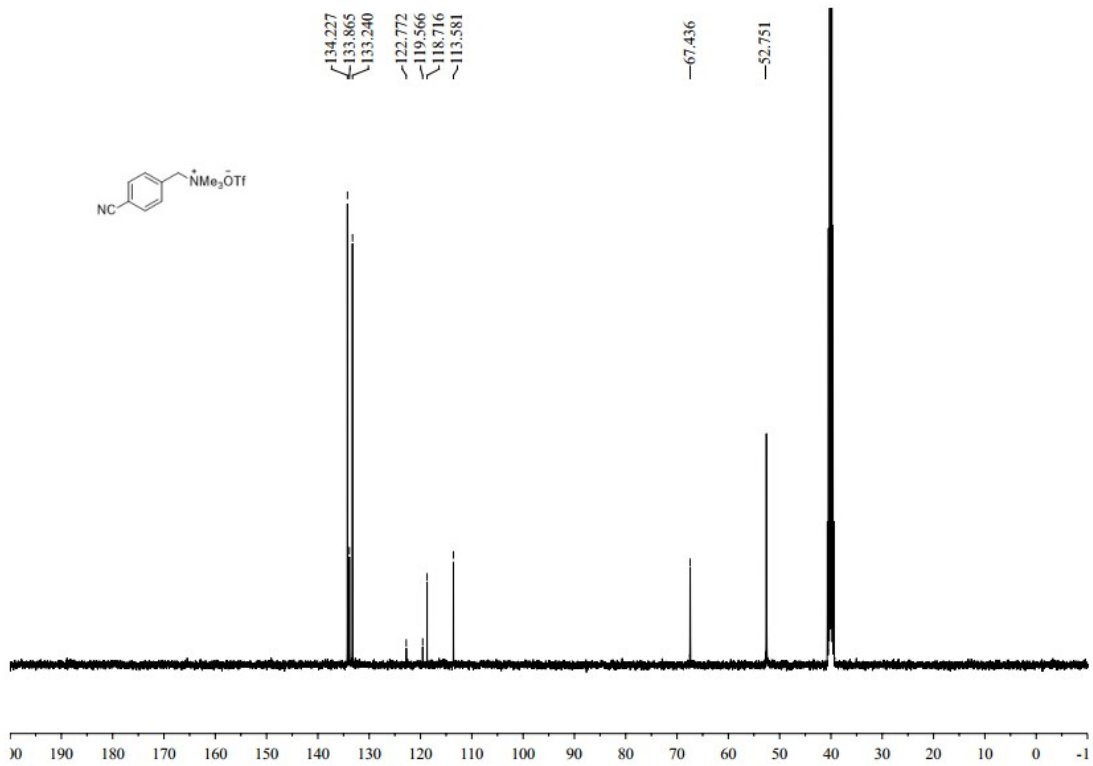

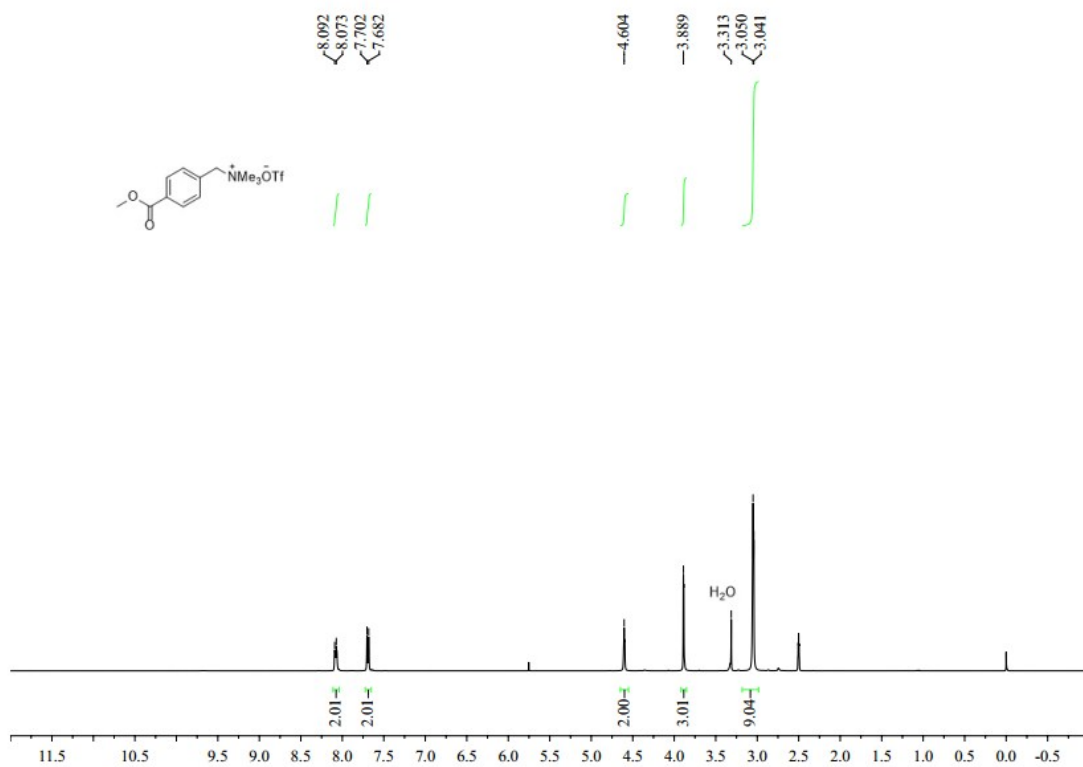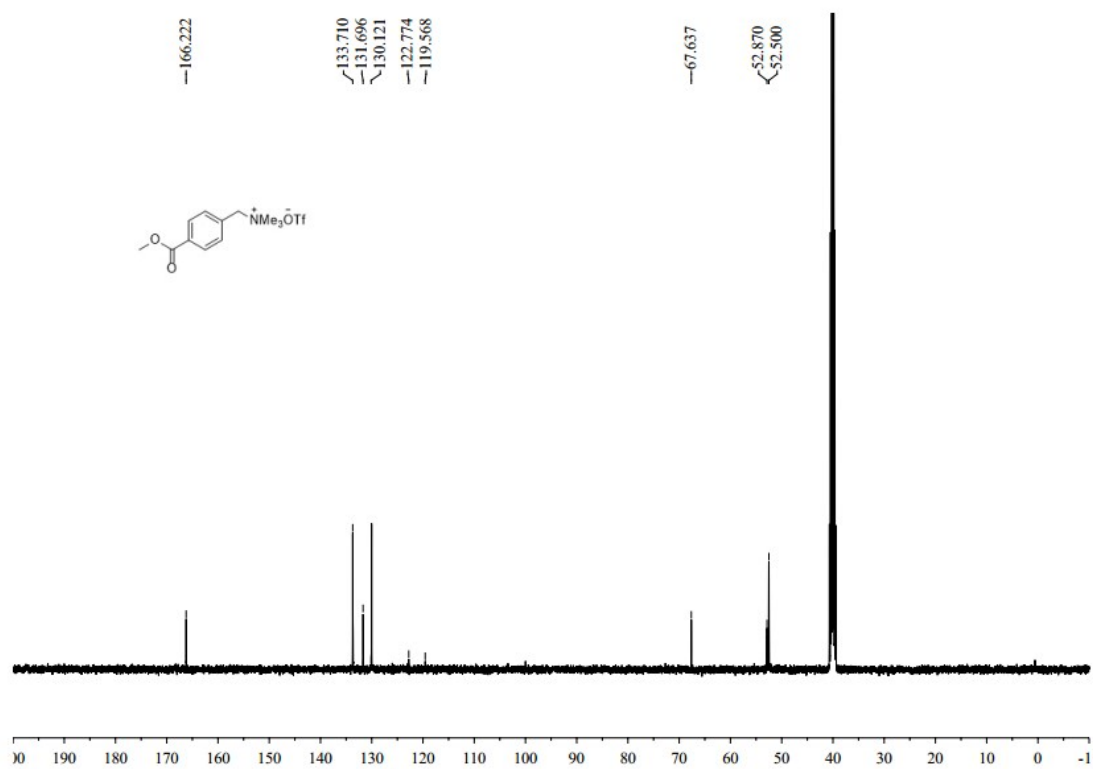

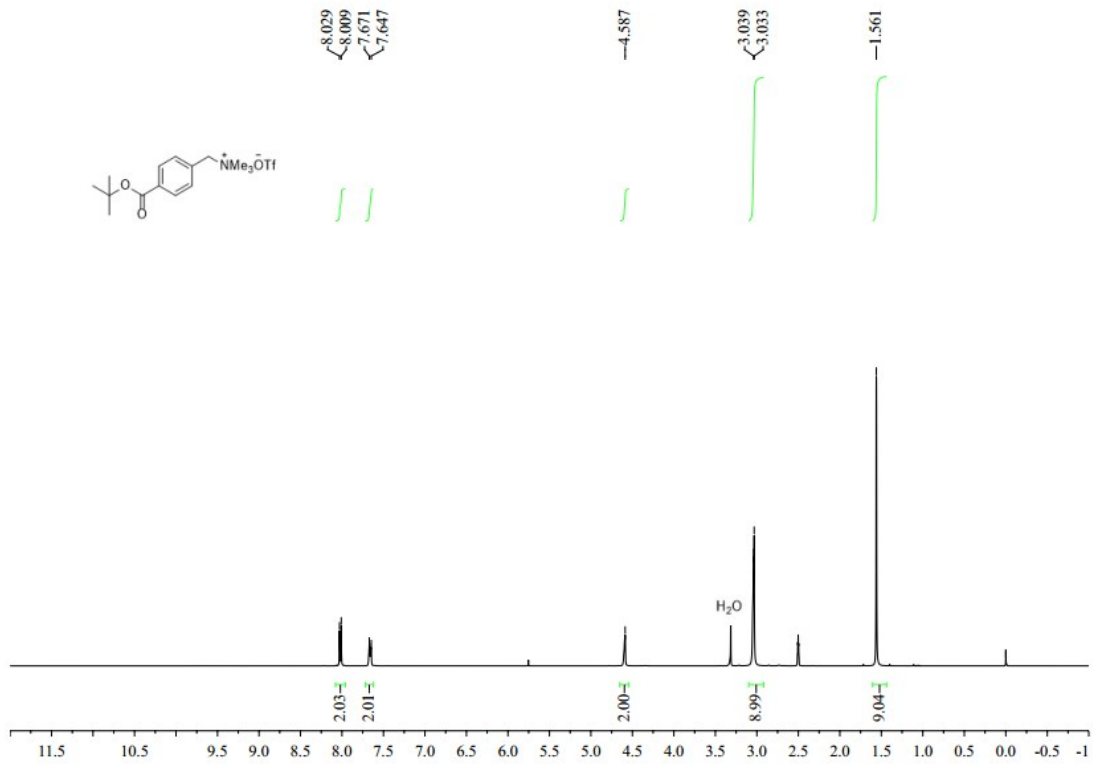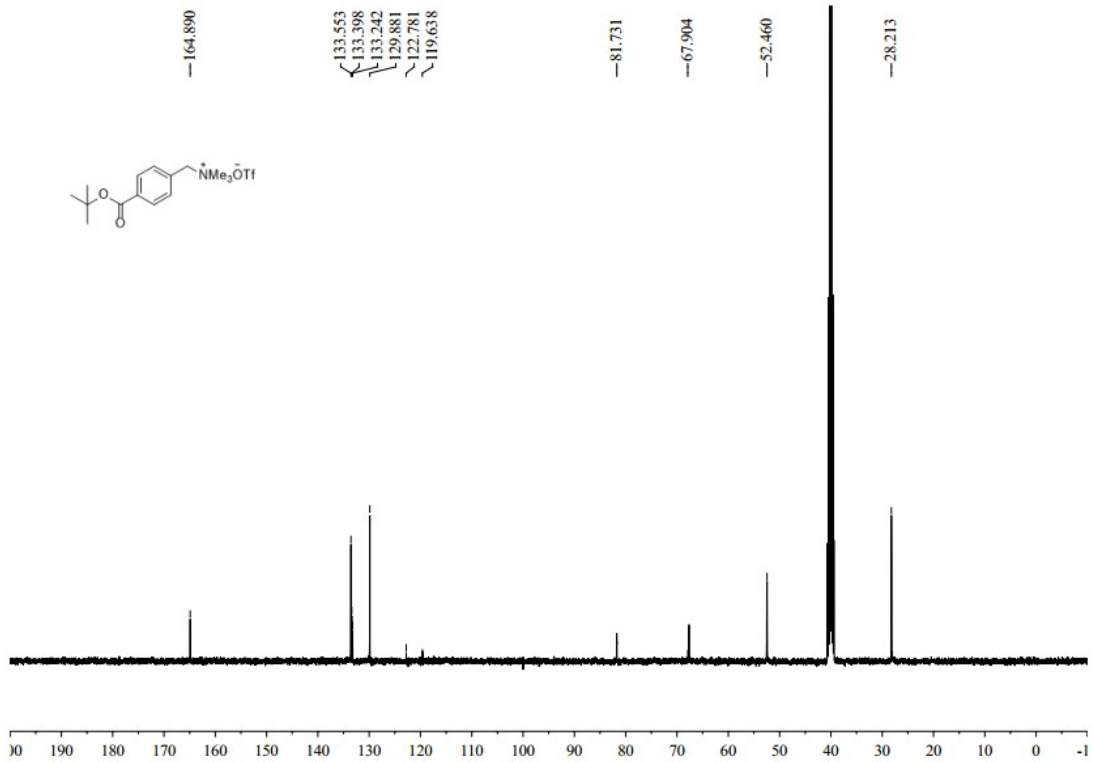

Supplement: c8ob00488a1.pdf [file c8ob00488a1.pdf]
